# Supplementary material for: Enantioselective Meerwein–Ponndorf–Verley reduction of β,γ-unsaturated α-keto esters by asymmetric binary-acid catalysis in the green solvent iPrOH
Source: Royal Society of Chemistry journal article supplement (doi:10.1039/d2gc03441g), 2023-01-01
Supplement: d2gc03441g1.pdf [file d2gc03441g1.pdf]

## Supporting Information

### Enantioselective Meerwein-Ponndorf-Verley Reduction of $\beta,\gamma$ - Unsaturated $\alpha$ -Keto Esters by Asymmetric Binary-Acid Catalysis in Green Solvent *i*PrOH

Huixin Qiu,<sup>a</sup> Jiayi Ren,<sup>a</sup> Long Zhang,<sup>\*b</sup> Ran Song,<sup>a</sup> Wen Si,<sup>a</sup> Daoshan Yang,<sup>a</sup> Lirong Wen,<sup>\*a</sup> and Jian Lv<sup>\*a</sup>

<sup>a</sup> Key Laboratory of Optic-electric Sensing and Analytic Chemistry for Life Science, MOE, College of Chemistry and Molecular Engineering, Qingdao University of Science & Technology, Qingdao 266042 (China), E-mail: lvjian@iccas.ac.cn (J. Lv); wenlirong@qust.edu.cn (L. Wen).

<sup>b</sup> Center of Basic Molecular Science, Department of Chemistry, Tsinghua University, Beijing 100084 (China), E-mail: zhanglong@tsinghua.edu.cn (L. Zhang).

### TABLE OF CONTENTS

|                                                             |      |
|-------------------------------------------------------------|------|
| I. General Experiment Information and Materials.....        | S2   |
| II. Optimization.....                                       | S3   |
| III. Experimental Procedures and Characterization Data..... | S9   |
| IV. X-ray Structure.....                                    | S56  |
| V. Computational Data.....                                  | S57  |
| VI. Nonlinear effect.....                                   | S89  |
| VII. Control Experiments.....                               | S90  |
| VIII. NMR Spectrum.....                                     | S92  |
| IX. HPLC Data.....                                          | S182 |
| X. Reference.....                                           | S231 |

## I. General Experiment Information and Materials

All commercial reagents were used without further purification unless otherwise noted. Solvents were freshly dried according to *the purification handbook Purification of Laboratory Chemicals* before using. Proton and carbon magnetic resonance spectra ( $^1\text{H}$  NMR and  $^{13}\text{C}$  NMR) were recorded on a Bruker Avance 400 and 500MHz spectrometer. Tetramethylsilane (TMS) served as the internal standard for  $^1\text{H}$  NMR, and  $\text{CDCl}_3$  served as the internal standard for  $^{13}\text{C}$  NMR.  $^1\text{H}$  NMR data were reported as follows: chemical shift, multiplicity (s = singlet, d = doublet, t = triplet, m = multiplet, td = triplet of doublet, dt = doublet of triplet, dd = doublet of doublet), coupling constants (Hz), and integration. Infrared Spectroscopy was conducted on Thermo Fisher Nicolet is10. The X-ray single-crystal diffraction was performed on Saturn 724+ instrument. High resolution mass spectra were obtained on an Ultima Global spectrometer with an ESI source.

## II. Optimization

**Table S1.** Screening of different Lewis acids in MPV reaction of **2a**<sup>a</sup>

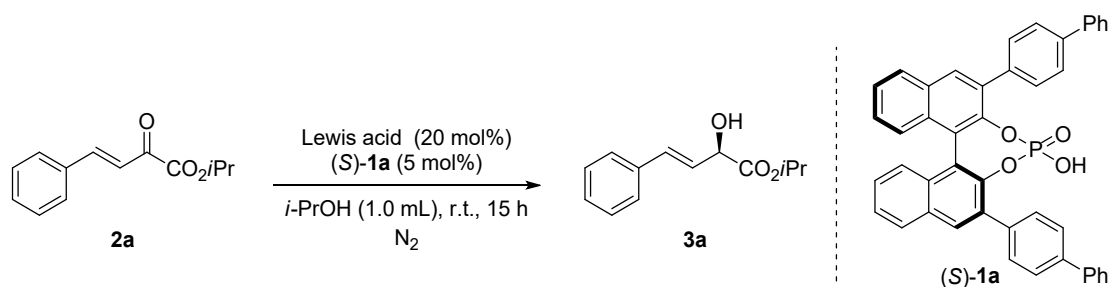

| Entry           | Lewis acid           | Yield (%) <sup>b</sup> | ee (%) <sup>c</sup> |
|-----------------|----------------------|------------------------|---------------------|
| 1               | HfCl <sub>4</sub>    | 95                     | 24                  |
| 2               | ScBr <sub>3</sub>    | 75                     | 59                  |
| 3               | Ni(OTf) <sub>2</sub> | NR                     | —                   |
| 4               | FeCl <sub>3</sub>    | NR                     | —                   |
| 5               | Cu(OTf) <sub>2</sub> | NR                     | —                   |
| 6               | InBr <sub>3</sub>    | NR                     | —                   |
| 7               | FeBr <sub>3</sub>    | NR                     | —                   |
| 8               | Bi(OAc) <sub>3</sub> | NR                     | —                   |
| 9               | Zn(OTf) <sub>2</sub> | trace                  | —                   |
| 10              | Hf(OTf) <sub>4</sub> | NR                     | —                   |
| 11              | InCl                 | trace                  | —                   |
| 12              | In(OAc) <sub>3</sub> | NR                     | —                   |
| 13              | InI <sub>3</sub>     | trace                  | —                   |
| 14              | CuBr <sub>2</sub>    | NR                     | —                   |
| 15              | CuBr                 | NR                     | —                   |
| 16              | Zn(OAc) <sub>2</sub> | NR                     | —                   |
| 17              | In(OTf) <sub>3</sub> | trace                  | —                   |
| 18              | Sc(OTf) <sub>3</sub> | 97                     | 91                  |
| 19              | Mg(OTf) <sub>2</sub> | NR                     | —                   |
| 20              | InCl <sub>3</sub>    | NR                     | —                   |
| 21              | Bi(OTf) <sub>3</sub> | NR                     | —                   |
| 22 <sup>d</sup> | Sc(OTf) <sub>3</sub> | 98                     | 90                  |

<sup>a</sup> Reaction conditions: **2a** (0.1 mmol) and Lewis acid (20 mol %), (*S*)-**1a** (5 mol%) in *i*-PrOH (1.0 mL) under N<sub>2</sub> at room temperature for 15 h. <sup>b</sup> Isolated yield. <sup>c</sup> Determined by HPLC analysis on a chiral stationary phase. <sup>d</sup> At 50 °C for 8 h. NR = No Reaction.

**Table S2.** Screening of different chiral ligands in MPV reaction of **2a** <sup>a</sup>

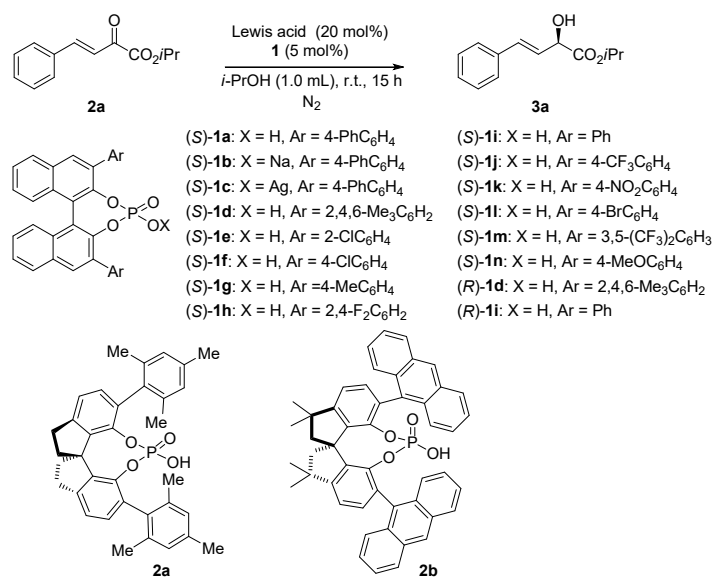

| Entry | Lewis acid             | Ligands        | Yield (%) <sup>b</sup> | ee (%) <sup>c</sup> |
|-------|------------------------|----------------|------------------------|---------------------|
| 1     | Sc(OTf) <sub>3</sub>   | (S)- <b>1a</b> | 97                     | 91                  |
| 2     | Sc(OTf) <sub>3</sub>   | (S)- <b>1b</b> | 83                     | 82                  |
| 3     | Sc(OTf) <sub>3</sub>   | (S)- <b>1c</b> | 97                     | 84                  |
| 4     | Sc(OTf) <sub>3</sub>   | (S)- <b>1d</b> | 96                     | 93                  |
| 5     | Sc(OTf) <sub>3</sub>   | (S)- <b>1e</b> | 97                     | 92                  |
| 6     | Sc(OTf) <sub>3</sub>   | (S)- <b>1f</b> | 84                     | 56                  |
| 7     | Sc(OTf) <sub>3</sub>   | (S)- <b>1g</b> | 95                     | 58                  |
| 8     | Sc(OTf) <sub>3</sub>   | (S)- <b>1h</b> | 96                     | 78                  |
| 9     | Sc(OTf) <sub>3</sub>   | (S)- <b>1i</b> | 96                     | 88                  |
| 10    | Sc(OTf) <sub>3</sub>   | (S)- <b>1j</b> | 98                     | 84                  |
| 11    | Sc(OTf) <sub>3</sub>   | (S)- <b>1k</b> | 88                     | 64                  |
| 12    | Sc(OTf) <sub>3</sub>   | (S)- <b>1l</b> | 97                     | 88                  |
| 13    | Sc(OTf) <sub>3</sub>   | (S)- <b>1m</b> | 90                     | Racemic             |
| 14    | Sc(OTf) <sub>3</sub>   | (S)- <b>1o</b> | 88                     | 84                  |
| 15    | Sc(OTf) <sub>3</sub>   | (R)- <b>1d</b> | 98                     | 96 (S)              |
| 16    | Sc(OTf) <sub>3</sub>   | (R)- <b>1i</b> | 95                     | 88 (S)              |
| 17    | Sc(OTf) <sub>3</sub>   | <b>2a</b>      | 99                     | 94                  |
| 18    | Sc(OTf) <sub>3</sub> = | <b>2b</b>      | 98                     | 90                  |

<sup>a</sup> Reaction conditions: **2a** (0.1 mmol) and Lewis acid (20 mol %), **1** (5 mol%) in *i*-PrOH (1.0 mL) under N<sub>2</sub> at room temperature for 15 h. <sup>b</sup> Isolated yield. <sup>c</sup> Determined by HPLC analysis on a chiral stationary phase.

**Table S3.** Screening of different ratio of binary acid in MPV reaction of **2a** <sup>a</sup>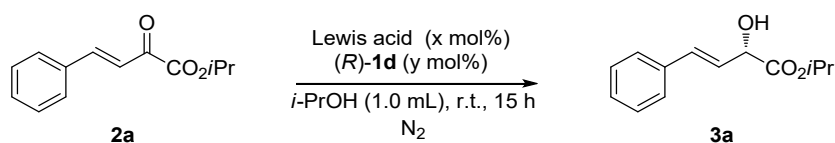

| Entry           | x   | y   | Yield (%) <sup>b</sup> | ee (%) <sup>c</sup> |
|-----------------|-----|-----|------------------------|---------------------|
| 1               | 20  | 5   | 98                     | 96                  |
| 2               | 15  | 5   | 98                     | 94                  |
| 3               | 10  | 5   | 97                     | 96                  |
| 4               | 5   | 5   | 97                     | 98                  |
| 5               | 20  | 1   | 98                     | 94                  |
| 6               | 15  | 1   | 99                     | 94                  |
| 7               | 10  | 1   | 98                     | 96                  |
| 8 <sup>d</sup>  | 5   | 1   | 98                     | 98                  |
| 9 <sup>d</sup>  | 5   | 0.5 | 85                     | 96                  |
| 10 <sup>d</sup> | 3   | 1   | 98                     | 98                  |
| 11 <sup>d</sup> | 1   | 1   | 89                     | 98                  |
| 12 <sup>d</sup> | 3   | 0.5 | 99                     | 98                  |
| 13 <sup>d</sup> | 1   | 0.5 | 88                     | 98                  |
| 14 <sup>e</sup> | 0.5 | 0.5 | 90                     | 98                  |
| 15 <sup>e</sup> | 0.5 | 0.2 | 88                     | 98                  |
| 16 <sup>e</sup> | 0.5 | 0.1 | 86                     | 96                  |

<sup>a</sup> Reaction conditions: **2a** (0.1 mmol) and Lewis acid (20 mol %), **1** (5 mol%) in *i*-PrOH (1.0 mL) under N<sub>2</sub> at room temperature for 15 h. <sup>b</sup> Isolated yield. <sup>c</sup> Determined by HPLC analysis on a chiral stationary phase. <sup>d</sup> **2a** (0.2 mmol) in *i*-PrOH (2.0 mL). <sup>e</sup> **2a** (0.5 mmol) in *i*-PrOH (5.0 mL).

**Table S4.** Screening of different chiral ligands in MPV reaction of **14a**<sup>a</sup>

**14a** Lewis acid (20 mol%)  
**1** (5 mol%)  
 $\xrightarrow{i\text{-PrOH (1.0 mL), r.t., 15 h}$   
 $N_2}$

**15a**

(S)-**1a**: X = H, Ar = 4-PhC<sub>6</sub>H<sub>4</sub>  
 (S)-**1b**: X = Na, Ar = 4-PhC<sub>6</sub>H<sub>4</sub>  
 (S)-**1c**: X = Ag, Ar = 4-PhC<sub>6</sub>H<sub>4</sub>  
 (S)-**1d**: X = H, Ar = 2,4,6-Me<sub>3</sub>C<sub>6</sub>H<sub>2</sub>  
 (S)-**1e**: X = H, Ar = 2-ClC<sub>6</sub>H<sub>4</sub>  
 (S)-**1f**: X = H, Ar = 4-ClC<sub>6</sub>H<sub>4</sub>  
 (S)-**1g**: X = H, Ar = 4-MeC<sub>6</sub>H<sub>4</sub>

(S)-**1h**: X = H, Ar = 2,4-F<sub>2</sub>C<sub>6</sub>H<sub>2</sub>  
 (S)-**1i**: X = H, Ar = Ph  
 (S)-**1j**: X = H, Ar = 4-CF<sub>3</sub>C<sub>6</sub>H<sub>4</sub>  
 (S)-**1k**: X = H, Ar = 4-NO<sub>2</sub>C<sub>6</sub>H<sub>4</sub>  
 (S)-**1l**: X = H, Ar = 4-BrC<sub>6</sub>H<sub>4</sub>  
 (S)-**1m**: X = H, Ar = 3,5-(CF<sub>3</sub>)<sub>2</sub>C<sub>6</sub>H<sub>3</sub>  
 (S)-**1n**: X = H, Ar = 4-MeOC<sub>6</sub>H<sub>4</sub>

| entry           | Lewis acid           | Ligands        | Yield (%) <sup>b</sup> | ee (%) <sup>c</sup> |
|-----------------|----------------------|----------------|------------------------|---------------------|
| 1               | Sc(OTf) <sub>3</sub> | (S)- <b>1a</b> | 36                     | Racemic             |
| 2               | Sc(OTf) <sub>3</sub> | (S)- <b>1b</b> | 22                     | racemic             |
| 3               | Sc(OTf) <sub>3</sub> | (S)- <b>1c</b> | 24                     | 2                   |
| 4               | Sc(OTf) <sub>3</sub> | (S)- <b>1d</b> | 67                     | 58                  |
| 5               | Sc(OTf) <sub>3</sub> | (S)- <b>1e</b> | 21                     | Racemic             |
| 6               | Sc(OTf) <sub>3</sub> | (S)- <b>1f</b> | 21                     | Racemic             |
| 7               | Sc(OTf) <sub>3</sub> | (S)- <b>1g</b> | 33                     | Racemic             |
| 8               | Sc(OTf) <sub>3</sub> | (S)- <b>1h</b> | 47                     | 2                   |
| 9               | Sc(OTf) <sub>3</sub> | (S)- <b>1i</b> | 36                     | Racemic             |
| 10              | Sc(OTf) <sub>3</sub> | (S)- <b>1j</b> | 35                     | 2                   |
| 11              | Sc(OTf) <sub>3</sub> | (S)- <b>1k</b> | 37                     | 2                   |
| 12              | Sc(OTf) <sub>3</sub> | (S)- <b>1l</b> | 48                     | Racemic             |
| 13              | Sc(OTf) <sub>3</sub> | (S)- <b>1m</b> | 36                     | 6                   |
| 14              | Sc(OTf) <sub>3</sub> | (S)- <b>1n</b> | 33                     | racemic             |
| 15 <sup>d</sup> | Sc(OTf) <sub>3</sub> | (S)- <b>1d</b> | 89                     | 88                  |
| 16 <sup>e</sup> | Sc(OTf) <sub>3</sub> | (S)- <b>1d</b> | 34                     | 12                  |
| 17 <sup>f</sup> | Sc(OTf) <sub>3</sub> | (S)- <b>1d</b> | 76                     | 78                  |

<sup>a</sup> Reaction conditions: **14a** (0.1 mmol) and Sc(OTf)<sub>3</sub> (20 mol %), **1** (5 mol%) in *i*-PrOH (1.0 mL) under N<sub>2</sub> at 50 °C for 8 h. <sup>b</sup> Isolated yield. <sup>c</sup> Determined by HPLC analysis on a chiral stationary phase. <sup>d</sup> 3 Å MS (10 mg). <sup>e</sup> 4 Å MS (10 mg). <sup>f</sup> 5 Å MS (10 mg).

**Table S5.** Screening of different ratio of binary acid in MPV reaction of **14a**<sup>a</sup>

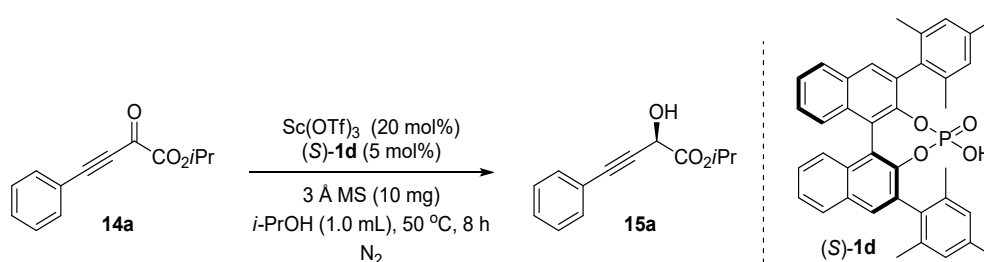

| Entry | x  | y  | Yield (%) <sup>b</sup> | ee (%) <sup>c</sup> |
|-------|----|----|------------------------|---------------------|
| 1     | 20 | 5  | 89                     | 88                  |
| 2     | 20 | 10 | 87                     | 88                  |
| 3     | 10 | 10 | 92                     | 90                  |
| 4     | 10 | 5  | 90                     | 92                  |
| 5     | 5  | 5  | 93                     | 90                  |

<sup>a</sup> Reaction conditions: **14a** (0.1 mmol),  $\text{Sc}(\text{OTf})_3$  (x mol %), **(S)-1d** (y mol%), and 3 Å MS (10 mg) in *i*-PrOH (1.0 mL) under  $\text{N}_2$  at 50 °C for 8 h. <sup>b</sup> Isolated yield. <sup>c</sup> Determined by HPLC analysis on a chiral stationary phase. nr = no reaction.

**Table S6.** Screening of different amount of Al(O*i*Pr)<sub>3</sub> as additive in MPV reaction of **14f**<sup>a</sup>

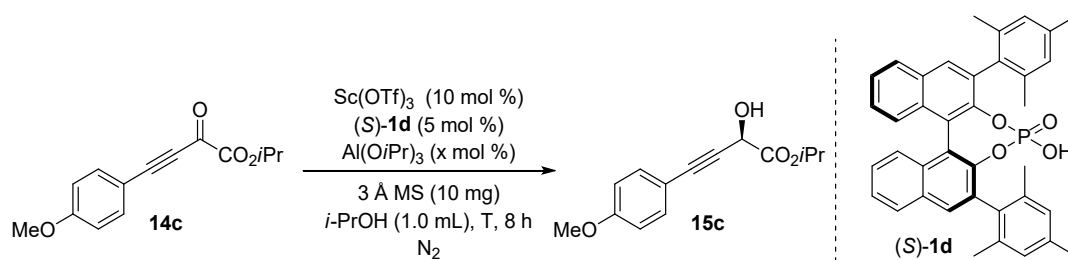

| Entry          | x  | T (°C) | Yield (%) <sup>b</sup> | ee (%) <sup>c</sup> |
|----------------|----|--------|------------------------|---------------------|
| 1              | 20 | 50     | 95                     | 90                  |
| 2              | 10 | 50     | 94                     | 86                  |
| 3              | 5  | 50     | 90                     | 86                  |
| 4 <sup>d</sup> | 20 | rt     | 90                     | 92                  |
| 5 <sup>d</sup> | 20 | 0      | 94                     | 95                  |
| 6 <sup>d</sup> | 20 | -20    | 90                     | 92                  |

<sup>a</sup> Reaction conditions: **14f** (0.1 mmol), Sc(OTf)<sub>3</sub> (10 mol %), (S)-**1d** (5 mol %), Al(O*i*Pr)<sub>3</sub> (x mol %), and 3 Å MS (10 mg) in *i*-PrOH (1.0 mL) under N<sub>2</sub> at 50 °C for 8 h. <sup>b</sup> Isolated yield. <sup>c</sup> Determined by HPLC analysis on a chiral stationary phase. <sup>d</sup> For 12 h.





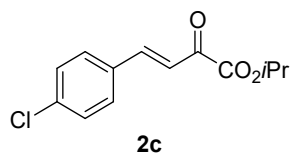

Prepared according to the general procedure I above and obtained as yellow oil, eluent: petroleum ether/ethyl acetate (20:1 to 10:1).  $^1\text{H}$  NMR (500 MHz,  $\text{CDCl}_3$ )  $\delta$  7.76 (d,  $J = 16.1$  Hz, 1H), 7.54 (d,  $J = 8.5$  Hz, 2H), 7.37 (d,  $J = 8.4$  Hz, 2H), 7.30 (d,  $J = 16.1$  Hz, 1H), 5.24 – 5.15 (m, 1H), 1.37 (d,  $J = 6.3$  Hz, 6H) ppm.  $^{13}\text{C}$  NMR (126 MHz,  $\text{CDCl}_3$ )  $\delta$  182.4, 161.2, 146.0, 137.0, 132.1, 129.6, 128.9, 120.5, 70.3, 21.1 ppm.

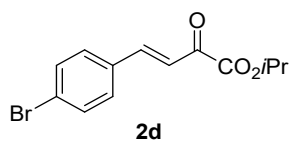

Prepared according to the general procedure I above and obtained as yellow oil, eluent: petroleum ether/ethyl acetate (20:1 to 10:1).  $^1\text{H}$  NMR (500 MHz,  $\text{CDCl}_3$ )  $\delta$  7.74 (d,  $J = 16.1$  Hz, 1H), 7.53 (d,  $J = 8.4$  Hz, 2H), 7.46 (d,  $J = 8.4$  Hz, 2H), 7.32 (d,  $J = 16.1$  Hz, 1H), 5.24 – 5.15 (m, 1H), 1.37 (d,  $J = 6.3$  Hz, 6H) ppm.  $^{13}\text{C}$  NMR (126 MHz,  $\text{CDCl}_3$ )  $\delta$  182.4, 161.2, 146.1, 132.5, 131.9, 129.8, 125.5, 120.6, 70.3, 21.2 ppm.

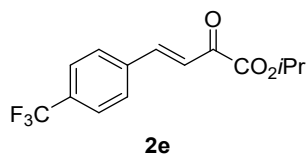

Prepared according to the general procedure I above and obtained as yellow oil, eluent: petroleum ether/ethyl acetate (20:1 to 10:1).  $^1\text{H}$  NMR (500 MHz,  $\text{CDCl}_3$ )  $\delta$  7.82 (d,  $J = 16.2$  Hz, 1H), 7.72 (d,  $J = 8.2$  Hz, 2H), 7.66 (d,  $J = 8.2$  Hz, 2H), 7.41 (d,  $J = 16.2$  Hz, 1H), 5.26 – 5.17 (m, 1H), 1.38 (d,  $J = 6.3$  Hz, 6H) ppm.  $^{13}\text{C}$  NMR (126 MHz,  $\text{CDCl}_3$ )  $\delta$  182.8, 161.5, 145.8, 137.4, 132.7 (q,  $J = 32.8$  Hz), 129.0, 126.0 (q,  $J = 3.7$  Hz), 123.7 (q,  $J = 272.4$  Hz), 122.8, 70.9, 21.6 ppm.

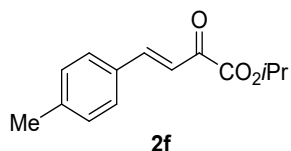

Prepared according to the general procedure I above and obtained as yellow oil, eluent: petroleum ether/ethyl acetate (20:1 to 10:1).  $^1\text{H}$  NMR (500 MHz,  $\text{CDCl}_3$ )  $\delta$  7.83 (d,  $J = 16.1$  Hz, 1H), 7.54 (d,  $J = 7.8$  Hz, 2H), 7.31 (d,  $J = 16.1$  Hz, 1H), 7.24 (d,  $J = 7.8$  Hz,

2H), 5.29 – 5.20 (m, 1H), 2.41 (s, 3H), 1.41 (d,  $J = 6.3$  Hz, 6H) ppm.  $^{13}\text{C}$  NMR (126 MHz,  $\text{CDCl}_3$ )  $\delta$  182.8, 161.6, 147.8, 141.9, 130.9, 129.3, 128.6, 119.2, 70.0, 21.2, 21.1 ppm.

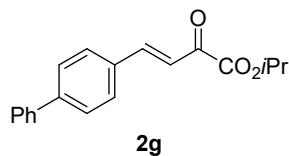

Prepared according to the general procedure I above and obtained as yellow oil, eluent: petroleum ether/ethyl acetate (20:1 to 10:1).  $^1\text{H}$  NMR (500 MHz,  $\text{CDCl}_3$ )  $\delta$  7.89 (d,  $J = 16.1$  Hz, 1H), 7.73 – 7.60 (m, 6H), 7.49 – 7.44 (m, 2H), 7.42 – 7.35 (m, 2H), 5.32 – 5.17 (m, 1H), 1.41 (d,  $J = 6.3$  Hz, 6H) ppm.  $^{13}\text{C}$  NMR (101 MHz,  $\text{CDCl}_3$ )  $\delta$  183.2, 162.0, 147.8, 144.3, 139.9, 133.0, 129.6, 129.0, 128.2, 127.7, 127.1, 120.5, 70.7, 21.7 ppm.

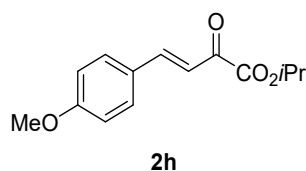

Prepared according to the general procedure I above and obtained as yellow oil, eluent: petroleum ether/ethyl acetate (20:1 to 10:1).  $^1\text{H}$  NMR (500 MHz,  $\text{CDCl}_3$ )  $\delta$  7.78 (d,  $J = 16.0$  Hz, 1H), 7.56 (d,  $J = 8.6$  Hz, 2H), 7.19 (d,  $J = 16.0$  Hz, 1H), 6.91 (d,  $J = 8.6$  Hz, 2H), 5.24 – 5.15 (m, 1H), 3.83 (s, 3H), 1.37 (d,  $J = 6.3$  Hz, 6H) ppm.  $^{13}\text{C}$  NMR (126 MHz,  $\text{CDCl}_3$ )  $\delta$  183.1, 162.6, 162.2, 148.1, 131.0, 126.8, 118.4, 114.6, 70.5, 55.4, 21.7 ppm.

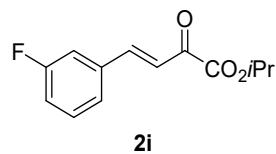

Prepared according to the general procedure I above and obtained as yellow oil, eluent: petroleum ether/ethyl acetate (20:1 to 10:1).  $^1\text{H}$  NMR (500 MHz,  $\text{CDCl}_3$ )  $\delta$  7.76 (d,  $J = 16.1$  Hz, 1H), 7.38 (s, 2H), 7.35 – 7.28 (m, 2H), 7.16 – 7.10 (m, 1H), 5.25 – 5.16 (m, 1H), 1.38 (d,  $J = 6.3$  Hz, 6H) ppm.  $^{13}\text{C}$  NMR (126 MHz,  $\text{CDCl}_3$ )  $\delta$  182.9, 163.0 (d,  $^1J_{\text{C-F}} = 247.0$  Hz), 161.6, 146.5 (d,  $^4J_{\text{C-F}} = 2.5$  Hz), 136.3 (d,  $^3J_{\text{C-F}} = 7.6$  Hz), 130.6 (d,  $^3J_{\text{C-F}} = 8.8$  Hz), 125.0 (d,  $^4J_{\text{C-F}} = 2.5$  Hz), 121.8, 118.3 (d,  $^2J_{\text{C-F}} = 21.4$  Hz), 115.0 (d,  $J = 21.4$

Hz), 70.8, 21.6 ppm.

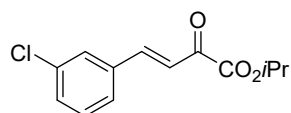

**2j**

Prepared according to the general procedure I above and obtained as yellow oil, eluent: petroleum ether/ethyl acetate (20:1 to 10:1). <sup>1</sup>H NMR (500 MHz, CDCl<sub>3</sub>) δ 7.74 (d, *J* = 16.1 Hz, 1H), 7.59 (s, 1H), 7.48 (d, *J* = 7.5 Hz, 1H), 7.40 (d, *J* = 8.0 Hz, 1H), 7.37 – 7.30 (m, 2H), 5.25 – 5.17 (m, 1H), 1.38 (d, *J* = 6.3 Hz, 6H) ppm. <sup>13</sup>C NMR (126 MHz, CDCl<sub>3</sub>) δ 182.9, 161.6, 146.3, 135.9, 135.1, 131.3, 130.3, 128.5, 127.1, 121.8, 70.9, 21.6 ppm.

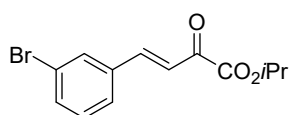

**2k**

Prepared according to the general procedure I above and obtained as yellow oil, eluent: petroleum ether/ethyl acetate (20:1 to 10:1). <sup>1</sup>H NMR (500 MHz, CDCl<sub>3</sub>) δ 7.79 – 7.73 (m, 2H), 7.56 (t, *J* = 9.1 Hz, 2H), 7.38 – 7.29 (m, 2H), 5.29 – 5.20 (m, 1H), 1.41 (d, *J* = 6.3 Hz, 6H) ppm. <sup>13</sup>C NMR (126 MHz, CDCl<sub>3</sub>) δ 182.8, 161.6, 146.1, 136.1, 134.2, 131.5, 130.6, 127.6, 123.2, 121.8, 70.9, 21.7 ppm.

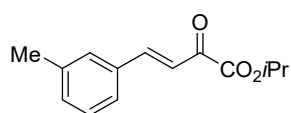

**2l**

Prepared according to the general procedure I above and obtained as yellow oil, eluent: petroleum ether/ethyl acetate (20:1 to 10:1). <sup>1</sup>H NMR (500 MHz, CDCl<sub>3</sub>) δ 7.84 (d, *J* = 16.1 Hz, 1H), 7.46 (d, *J* = 6.8 Hz, 2H), 7.37 – 7.27 (m, 3H), 5.30 – 5.21 (m, 1H), 2.41 (s, 3H), 1.42 (d, *J* = 6.3 Hz, 6H) ppm. <sup>13</sup>C NMR (126 MHz, CDCl<sub>3</sub>) δ 183.3, 162.0, 148.5, 138.8, 134.0, 132.5, 129.6, 129.0, 126.3, 120.5, 70.6, 21.7, 21.3 ppm.

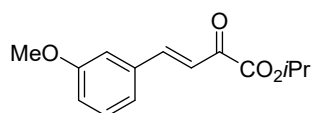

**2m**

Prepared according to the general procedure I above and obtained as yellow oil, eluent: petroleum ether/ethyl acetate (20:1 to 10:1). <sup>1</sup>H NMR (500 MHz, CDCl<sub>3</sub>) δ 7.78 (d, *J* =

16.1 Hz, 1H), 7.34 – 7.27 (m, 2H), 7.20 (d,  $J = 7.5$  Hz, 1H), 7.11 (s, 1H), 6.98 (d, 1H), 5.25 – 5.16 (m, 1H), 3.82 (s, 3H), 1.37 (d,  $J = 6.3$  Hz, 6H) ppm.  $^{13}\text{C}$  NMR (126 MHz,  $\text{CDCl}_3$ )  $\delta$  183.2, 161.9, 160.0, 148.2, 135.4, 130.1, 121.8, 120.9, 117.6, 113.5, 70.7, 55.4, 21.6 ppm.

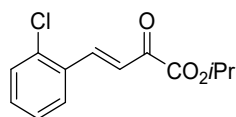

**2n**

Prepared according to the general procedure I above and obtained as yellow oil, eluent: petroleum ether/ethyl acetate (20:1 to 10:1).  $^1\text{H}$  NMR (500 MHz,  $\text{CDCl}_3$ )  $\delta$  8.25 (d,  $J = 16.2$  Hz, 1H), 7.74 (d,  $J = 7.7$  Hz, 1H), 7.44 (d,  $J = 7.9$  Hz, 1H), 7.37 (t,  $J = 7.1$  Hz, 1H), 7.34 – 7.28 (m, 2H), 5.29 – 5.20 (m, 1H), 1.40 (d,  $J = 6.3$  Hz, 6H) ppm.  $^{13}\text{C}$  NMR (126 MHz,  $\text{CDCl}_3$ )  $\delta$  183.4, 161.8, 143.8, 136.0, 132.2, 132.2, 130.4, 127.9, 127.2, 123.1, 70.8, 21.7 ppm.

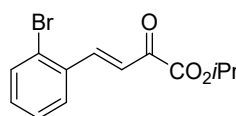

**2o**

Prepared according to the general procedure I above and obtained as yellow oil, eluent: petroleum ether/ethyl acetate (20:1 to 10:1).  $^1\text{H}$  NMR (500 MHz,  $\text{CDCl}_3$ )  $\delta$  8.13 (d,  $J = 16.1$  Hz, 1H), 7.64 (d,  $J = 7.7$  Hz, 1H), 7.56 (d,  $J = 7.9$  Hz, 1H), 7.28 (t,  $J = 7.4$  Hz, 1H), 7.20 (t, 1H), 7.14 (d,  $J = 16.1$  Hz, 1H), 5.20 – 5.11 (m, 1H), 1.32 (d,  $J = 6.2$  Hz, 6H) ppm.  $^{13}\text{C}$  NMR (101 MHz,  $\text{CDCl}_3$ )  $\delta$  178.1, 156.5, 141.2, 128.7, 128.4, 127.0, 122.8, 122.6, 121.2, 118.1, 65.5, 16.4 ppm.

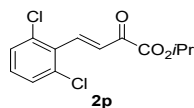

Prepared according to the general procedure I above and obtained as yellow oil, eluent: petroleum ether/ethyl acetate (20:1 to 10:1).  $^1\text{H}$  NMR (500 MHz,  $\text{CDCl}_3$ )  $\delta$  7.93 (d,  $J = 16.6$  Hz, 1H), 7.48 (d,  $J = 16.6$  Hz, 1H), 7.37 (d,  $J = 8.0$  Hz, 2H), 7.22 (t,  $J = 8.1$  Hz, 1H), 5.26 – 5.18 (m, 1H), 1.38 (d,  $J = 6.3$  Hz, 6H) ppm.  $^{13}\text{C}$  NMR (101 MHz,  $\text{CDCl}_3$ )  $\delta$  183.5, 161.4, 141.3, 135.5, 131.5, 130.6, 129.0, 128.9, 70.9, 21.7 ppm.

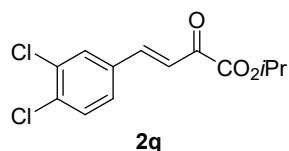

Prepared according to the general procedure I above and obtained as yellow oil, eluent: petroleum ether/ethyl acetate (20:1 to 10:1).  $^1\text{H}$  NMR (400 MHz,  $\text{CDCl}_3$ )  $\delta$  7.74 – 7.67 (m, 2H), 7.50 – 7.41 (m, 2H), 7.32 (d,  $J = 16.2$  Hz, 1H), 5.26 – 5.15 (m, 1H), 1.38 (d,  $J = 6.3$  Hz, 6H) ppm.  $^{13}\text{C}$  NMR (101 MHz,  $\text{CDCl}_3$ )  $\delta$  182.6, 161.5, 145.0, 135.5, 134.1, 133.5, 131.1, 130.4, 127.8, 122.1, 71.0, 21.6 ppm.

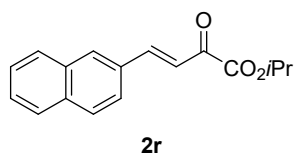

Prepared according to the general procedure I above and obtained as yellow oil, eluent: petroleum ether/ethyl acetate (20:1 to 10:1);  $^1\text{H}$  NMR (400 MHz,  $\text{CDCl}_3$ )  $\delta$  7.99 (d,  $J = 16.5$  Hz, 2H), 7.89 – 7.81 (m, 3H), 7.74 (dd,  $J = 8.6, 1.5$  Hz, 1H), 7.57 – 7.49 (m, 2H), 7.44 (d,  $J = 16.0$  Hz, 1H), 5.30 – 5.19 (m, 1H), 1.41 (d,  $J = 6.3$  Hz, 6H) ppm.  $^{13}\text{C}$  NMR (101 MHz,  $\text{CDCl}_3$ )  $\delta$  183.2, 162.0, 148.3, 134.8, 133.2, 131.9, 131.6, 128.9, 128.9, 128.0, 127.9, 127.0, 123.6, 120.8, 70.7, 21.7 ppm.

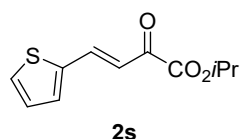

Prepared according to the general procedure I above and obtained as yellow oil, eluent: petroleum ether/ethyl acetate (20:1 to 10:1).  $^1\text{H}$  NMR (400 MHz,  $\text{CDCl}_3$ )  $\delta$  7.95 (d,  $J = 15.7$  Hz, 1H), 7.49 (d,  $J = 5.1$  Hz, 1H), 7.40 (d,  $J = 3.6$  Hz, 1H), 7.14 – 7.07 (m, 2H), 5.25 – 5.14 (m, 1H), 1.38 (s, 3H), 1.36 (s, 3H) ppm.  $^{13}\text{C}$  NMR (101 MHz,  $\text{CDCl}_3$ )  $\delta$  182.6, 161.8, 140.3, 139.8, 133.6, 130.8, 128.7, 119.4, 70.7, 21.7 ppm.

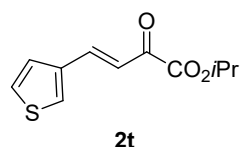

Prepared according to the general procedure I above and obtained as yellow oil, eluent: petroleum ether/ethyl acetate (20:1 to 10:1).  $^1\text{H}$  NMR (400 MHz,  $\text{CDCl}_3$ )  $\delta$  7.82 (d,  $J = 16.0$  Hz, 1H), 7.68 – 7.65 (m, 1H), 7.40 – 7.35 (m, 2H), 7.13 (d,  $J = 16.0$  Hz, 1H), 5.25

– 5.15 (m, 1H), 1.38 (s, 3H), 1.37 (s, 3H) ppm.  $^{13}\text{C}$  NMR (101 MHz,  $\text{CDCl}_3$ )  $\delta$  183.4, 161.9, 141.3, 137.7, 131.2, 127.4, 125.3, 120.5, 70.6, 21.7 ppm.

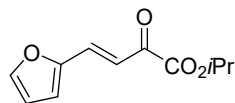

**2u**

Prepared according to the general procedure I above and obtained as yellow oil, eluent: petroleum ether/ethyl acetate (20:1 to 10:1).  $^1\text{H}$  NMR (400 MHz,  $\text{CDCl}_3$ )  $\delta$  7.58 (d,  $J$  = 15.6 Hz, 2H), 7.18 (d,  $J$  = 15.8 Hz, 1H), 6.80 (d,  $J$  = 3.4 Hz, 1H), 6.52 (dd,  $J$  = 3.5, 1.8 Hz, 1H), 5.24 – 5.13 (m, 1H), 1.37 (s, 3H), 1.35 (s, 3H) ppm.  $^{13}\text{C}$  NMR (101 MHz,  $\text{CDCl}_3$ )  $\delta$  182.8, 161.7, 151.1, 146.2, 133.4, 118.4, 118.2, 113.1, 70.6, 21.6 ppm.

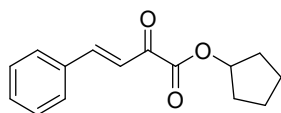

**2v**

Prepared according to the general procedure I above and obtained as yellow oil, eluent: petroleum ether/ethyl acetate (20:1 to 10:1).  $^1\text{H}$  NMR (400 MHz,  $\text{CDCl}_3$ )  $\delta$  7.73 (d,  $J$  = 16.2 Hz, 1H), 7.55 – 7.50 (m, 2H), 7.38 – 7.30 (m, 3H), 7.21 (d,  $J$  = 16.2 Hz, 1H), 5.32 – 5.25 (m, 1H), 1.95 – 1.83 (m, 2H), 1.81 – 1.67 (m, 4H), 1.61 – 1.51 (m, 2H) ppm.  $^{13}\text{C}$  NMR (101 MHz,  $\text{CDCl}_3$ )  $\delta$  183.4, 162.3, 148.2, 134.1, 131.6, 129.1, 129.0, 120.8, 79.7, 32.6, 23.8 ppm.

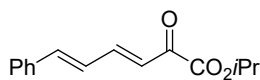

**6**

Prepared according to the general procedure I above and obtained as yellow oil, eluent: petroleum ether/ethyl acetate (20:1 to 10:1).  $^1\text{H}$  NMR (500 MHz,  $\text{CDCl}_3$ )  $\delta$  7.67 – 7.58 (m, 1H), 7.50 (d,  $J$  = 6.9 Hz, 2H), 7.40 – 7.34 (m, 3H), 7.08 (d,  $J$  = 15.5 Hz, 1H), 7.02 – 6.95 (m, 1H), 6.87 (d,  $J$  = 15.3 Hz, 1H), 5.25 – 5.16 (m, 1H), 1.38 (d,  $J$  = 6.3 Hz, 6H) ppm.  $^{13}\text{C}$  NMR (101 MHz,  $\text{CDCl}_3$ )  $\delta$  183.3, 161.9, 148.2, 144.4, 135.7, 129.9, 129.0, 127.6, 126.6, 124.2, 70.5, 21.7 ppm.

## B) Synthesis of $\beta,\gamma$ -unsaturated $\alpha$ -keto esters **4**

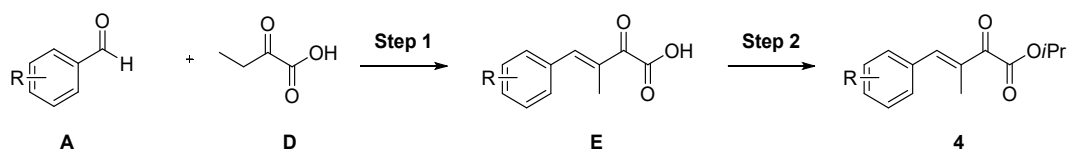

**General procedure II:** To a solution of aqueous 0.5 M NaOH (0.6 g, 15 mmol) in water (30 mL), under  $N_2$  at room temperature, 2-oxobutyric acid **D** (0.936 mL, 11 mmol) was added in portions (5 mL of EtOH were used to wash the product container). The reaction was then left stirring for 5 min and a solution of benzaldehyde derivatives **A** (1.4 g, 10 mmol) in EtOH (5 mL) was then slowly added. The reaction was left to stir at 25 °C overnight. Water was added (5.6 mL) and the solution evaporated under reduced pressure to eliminate the excess of EtOH. The solution was then washed with toluene and evaporated (3 x 4 mL) to eliminate traces of this solvent. The aqueous solution was then cooled down in an ice bath and conc. HCl (2 mL) was slowly added under magnetically stirring. A white solid precipitated from the solution which was kept at 0 °C for another hour. The solid **E** was filtered and dried at 40 °C under vacuum.

To a stirred solution of **E** (8.5 mmol) and isopropyl alcohol (12.75 mmol) in  $CH_2Cl_2$  (40 mL) in an ice bath was added a solution of 4-Dimethylaminopyridine (0.85 mmol, 10 mol%) and *N,N'*-diisopropylcarbodiimide (9.4 mmol) in  $CH_2Cl_2$  (10 mL) via a dropping funnel. The reaction mixture was allowed to warm up to room temperature and stirred overnight. Then, the reaction solution was filtrated, and the corresponding solution was concentrated under reduced pressure. Purification of mixture by column chromatography on silica gel (PE/EA = 20:1 to 10:1, v/v) gave the desired products **4**.

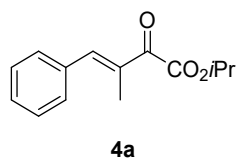

Prepared according to the general procedure II above and obtained as yellow oil, eluent: petroleum ether/ethyl acetate (20:1 to 10:1).  $^1H$  NMR (400 MHz,  $CDCl_3$ )  $\delta$  7.49 – 7.37 (m, 6H), 5.35 – 5.25 (m, 1H), 2.14 (d,  $J = 1.3$  Hz, 3H), 1.41 (s, 3H), 1.39 (s, 3H) ppm.  $^{13}C$  NMR (101 MHz,  $CDCl_3$ )  $\delta$  190.2, 165.0, 146.6, 134.8, 133.3, 130.2, 129.7, 128.7, 70.4, 21.7, 12.1 ppm.



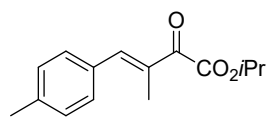

**4b**

Prepared according to the general procedure II above and obtained as yellow oil, eluent: petroleum ether/ethyl acetate (20:1 to 10:1).  $^1\text{H}$  NMR (500 MHz,  $\text{CDCl}_3$ )  $\delta$  7.42 (d,  $J = 8.5$  Hz, 3H), 7.28 (d,  $J = 7.8$  Hz, 2H), 5.37 – 5.29 (m, 1H), 2.42 (s, 3H), 2.17 (s, 3H), 1.43 (d,  $J = 6.2$  Hz, 6H) ppm.  $^{13}\text{C}$  NMR (126 MHz,  $\text{CDCl}_3$ )  $\delta$  190.3, 165.1, 146.8, 140.3, 132.4, 132.1, 130.4, 129.4, 70.2, 21.7, 21.5, 12.1 ppm.

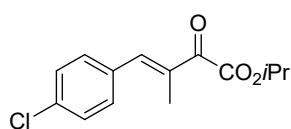

**4c**

Prepared according to the general procedure II above and obtained as yellow oil, eluent: petroleum ether/ethyl acetate (20:1 to 10:1).  $^1\text{H}$  NMR (400 MHz,  $\text{CDCl}_3$ )  $\delta$  7.42 – 7.36 (m, 5H), 5.33 – 5.23 (m, 1H), 2.10 (d,  $J = 1.3$  Hz, 3H), 1.39 (s, 3H), 1.38 (s, 3H) ppm.  $^{13}\text{C}$  NMR (101 MHz,  $\text{CDCl}_3$ )  $\delta$  189.8, 164.7, 144.9, 135.8, 133.8, 133.3, 131.4, 129.0, 70.5, 21.7, 12.1 ppm.

### C) Synthesis of $\alpha,\beta$ -alkynyl keto esters **14**

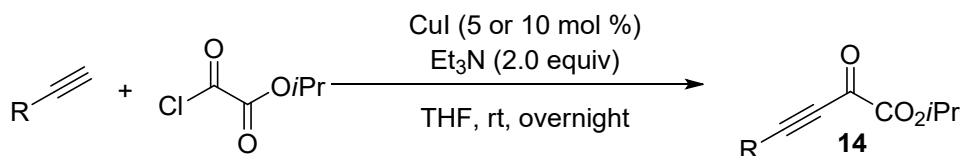

**General procedure III:** In a two-necked round-bottomed flask equipped with a magnetic stirred bar, a rubber septum, and a nitrogen balloon was placed CuI (5 or 10 mol %), and to it was added THF (0.4 M), triethylamine (2.0 equiv), alkyne and isopropyl 2-chloro-2-oxoacetate (1.2 equiv). After the mixture was stirred overnight at room temperature, the reaction was quenched with sat.  $\text{NaHCO}_3$  aq, and the whole mixture was filtered with a celite pad and extracted with ethyl acetate (10 mL $\times$ 3). The combined extracts were washed with brine, dried over anhydrous  $\text{Na}_2\text{SO}_4$ , and concentrated in vacuo. The crude product was purified by silica gel chromatography (*n*-hexane/ethyl acetate = 20/1) to give the  $\alpha,\beta$ -alkynyl ketoester **14**.

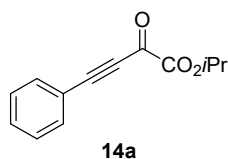

Prepared according to the general procedure III above and obtained as yellow oil, eluent: petroleum ether/ethyl acetate (30:1 to 10:1).  $^1\text{H}$  NMR (500 MHz,  $\text{CDCl}_3$ )  $\delta$  7.64 (d,  $J = 8.3$  Hz, 2H), 7.50 (t,  $J = 7.5$  Hz, 1H), 7.40 (t,  $J = 7.8$  Hz, 2H), 5.25 – 5.13 (m, 1H), 1.39 (s, 3H), 1.38 (s, 3H) ppm.  $^{13}\text{C}$  NMR (126 MHz,  $\text{CDCl}_3$ )  $\delta$  170.0, 158.8, 133.8, 131.8, 128.8, 119.2, 97.8, 87.2, 71.7, 21.6 ppm.

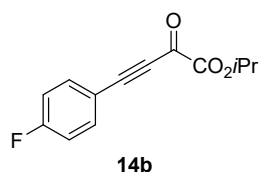

Prepared according to the general procedure III above and obtained as yellow oil, eluent: petroleum ether/ethyl acetate (30:1 to 10:1).  $^1\text{H}$  NMR (500 MHz,  $\text{CDCl}_3$ )  $\delta$  7.65 (dd,  $J = 8.6, 5.5$  Hz, 2H), 7.10 (t,  $J = 8.6$  Hz, 2H), 5.24 – 5.11 (m, 1H), 1.39 (s, 3H), 1.37 (s, 3H) ppm.  $^{13}\text{C}$  NMR (126 MHz,  $\text{CDCl}_3$ )  $\delta$  169.9, 164.6 (d,  $^1J_{\text{C-F}} = 256.2$  Hz), 158.8, 136.2 (d,  $^3J_{\text{C-F}} = 9.3$  Hz), 116.4 (d,  $^2J_{\text{C-F}} = 22.6$  Hz), 115.3 (d,  $^4J_{\text{C-F}} = 3.3$  Hz), 96.6, 87.2, 71.7, 21.5 ppm.

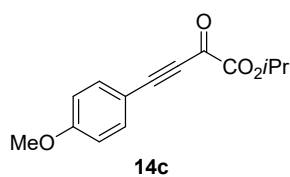

Prepared according to the general procedure III above and obtained as yellow oil, eluent: petroleum ether/ethyl acetate (30:1 to 10:1).  $^1\text{H}$  NMR (500 MHz,  $\text{CDCl}_3$ )  $\delta$  7.60 (d,  $J = 8.6$  Hz, 2H), 6.91 (d,  $J = 8.6$  Hz, 2H), 5.23 – 5.09 (m, 1H), 3.84 (s, 3H), 1.38 (s, 3H), 1.37 (s, 3H) ppm.  $^{13}\text{C}$  NMR (126 MHz,  $\text{CDCl}_3$ )  $\delta$  169.8, 162.6, 159.1, 136.0, 114.6, 110.9, 99.5, 87.8, 71.5, 55.5, 21.6 ppm.

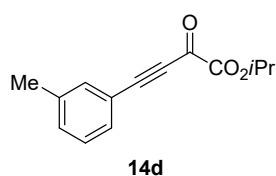

Prepared according to the general procedure III above and obtained as yellow oil, eluent: petroleum ether/ethyl acetate (30:1 to 10:1).  $^1\text{H}$  NMR (500 MHz,  $\text{CDCl}_3$ )  $\delta$  7.46 (d,  $J = 8.2$  Hz, 2H), 7.30 (q,  $J = 8.2, 7.6$  Hz, 2H), 5.25 – 5.11 (m, 1H), 2.36 (s, 3H), 1.40 (s, 3H), 1.39 (s, 3H) ppm.  $^{13}\text{C}$  NMR (126 MHz,  $\text{CDCl}_3$ )  $\delta$  170.0, 158.9, 138.7, 134.2, 132.8, 130.9, 128.7, 119.0, 100.0, 98.3, 87.0, 71.6, 21.6, 21.1 ppm.

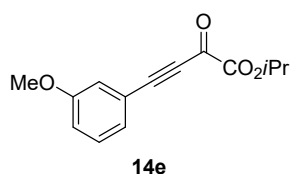

Prepared according to the general procedure III above and obtained as yellow oil, eluent: petroleum ether/ethyl acetate (30:1 to 10:1).  $^1\text{H}$  NMR (500 MHz,  $\text{CDCl}_3$ )  $\delta$  7.31 (t,  $J = 7.9$  Hz, 1H), 7.26 – 7.24 (m, 1H), 7.14 (s, 1H), 7.08 – 7.03 (m, 1H), 5.25 – 5.10 (m, 1H), 3.81 (s, 3H), 1.40 (s, 3H), 1.39 (s, 3H) ppm.  $^{13}\text{C}$  NMR (126 MHz,  $\text{CDCl}_3$ )  $\delta$  170.0, 159.5, 158.8, 129.9, 126.3, 120.1, 118.7, 118.0, 97.7, 86.8, 71.7, 55.4, 21.6 ppm.

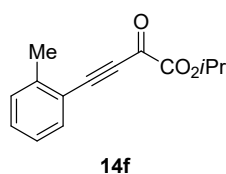

Prepared according to the general procedure III above and obtained as yellow oil,

eluent: petroleum ether/ethyl acetate (30:1 to 10:1).  $^1\text{H}$  NMR (500 MHz,  $\text{CDCl}_3$ )  $\delta$  7.61 (d,  $J = 7.7$  Hz, 1H), 7.41 (t,  $J = 7.5$  Hz, 1H), 7.29 (d,  $J = 7.7$  Hz, 1H), 7.23 (t,  $J = 7.6$  Hz, 1H), 5.26 – 5.17 (m, 1H), 2.56 (s, 3H), 1.41 (s, 3H), 1.40 (s, 3H) ppm.  $^{13}\text{C}$  NMR (126 MHz,  $\text{CDCl}_3$ )  $\delta$  169.9, 158.7, 143.6, 134.4, 131.9, 130.0, 126.0, 119.0, 97.1, 91.1, 71.6, 21.6, 20.5.

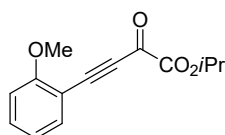

14g

Prepared according to the general procedure III above and obtained as yellow oil, eluent: petroleum ether/ethyl acetate (30:1 to 10:1).  $^1\text{H}$  NMR (500 MHz,  $\text{CDCl}_3$ )  $\delta$  7.56 (dd,  $J = 7.6, 1.5$  Hz, 1H), 7.49 – 7.43 (m, 1H), 6.99 – 6.89 (m, 2H), 5.24 – 5.13 (m, 1H), 3.91 (s, 3H), 1.39 (s, 3H), 1.38 (s, 3H) ppm.  $^{13}\text{C}$  NMR (126 MHz,  $\text{CDCl}_3$ )  $\delta$  170.0, 162.4, 158.9, 135.8, 133.8, 120.7, 111.1, 108.4, 95.5, 91.5, 71.5, 56.0, 21.6 ppm.

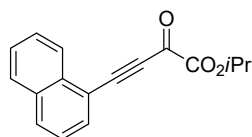

14h

Prepared according to the general procedure III above and obtained as yellow oil, eluent: petroleum ether/ethyl acetate (30:1 to 10:1).  $^1\text{H}$  NMR (500 MHz,  $\text{CDCl}_3$ )  $\delta$  8.47 (d,  $J = 8.3$  Hz, 1H), 8.02 (d,  $J = 8.2$  Hz, 1H), 7.91 (dd,  $J = 18.0, 7.6$  Hz, 2H), 7.66 (t,  $J = 7.6$  Hz, 1H), 7.58 (t,  $J = 7.5$  Hz, 1H), 7.50 (t,  $J = 7.7$  Hz, 1H), 5.34 – 5.23 (m, 1H), 1.47 (s, 3H), 1.46 (s, 3H) ppm.  $^{13}\text{C}$  NMR (126 MHz,  $\text{CDCl}_3$ )  $\delta$  169.8, 158.7, 134.6, 134.2, 133.1, 132.9, 128.7, 128.1, 127.2, 125.8, 125.3, 116.7, 96.5, 92.2, 71.8, 21.7 ppm.

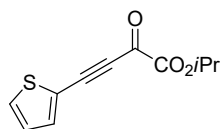

14i

Prepared according to the general procedure III above and obtained as yellow oil, eluent: petroleum ether/ethyl acetate (30:1 to 10:1).  $^1\text{H}$  NMR (500 MHz,  $\text{CDCl}_3$ )  $\delta$  7.61 (s, 2H), 7.15 – 7.07 (m, 1H), 5.24 – 5.09 (m, 1H), 1.39 (d,  $J = 3.8$  Hz, 3H), 1.38 – 1.34

(m, 3H) ppm.  $^{13}\text{C}$  NMR (126 MHz,  $\text{CDCl}_3$ )  $\delta$  169.4, 158.8, 138.6, 133.7, 128.1, 119.0, 92.6, 92.1, 71.8, 21.6 ppm.

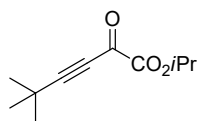

**14j**

Prepared according to the general procedure III above and obtained as yellow oil, eluent: petroleum ether/ethyl acetate (30:1 to 10:1).  $^1\text{H}$  NMR (500 MHz,  $\text{CDCl}_3$ )  $\delta$  5.17 – 5.10 (m, 1H), 1.36 (s, 3H), 1.35 (s, 3H), 1.33 (s, 9H) ppm.  $^{13}\text{C}$  NMR (126 MHz,  $\text{CDCl}_3$ )  $\delta$  170.5, 158.9, 109.2, 78.3, 71.4, 29.7, 28.2, 21.5 ppm.

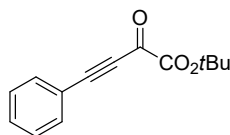

**14k**

Prepared according to the general procedure III above and obtained as yellow oil, eluent: petroleum ether/ethyl acetate (30:1 to 10:1).  $^1\text{H}$  NMR (500 MHz,  $\text{CDCl}_3$ )  $\delta$  7.64 (d,  $J = 8.3$  Hz, 2H), 7.50 (t,  $J = 8.1$  Hz, 1H), 7.40 (t,  $J = 7.6$  Hz, 2H), 1.59 (s, 9H) ppm.  $^{13}\text{C}$  NMR (126 MHz,  $\text{CDCl}_3$ ) 170.9, 158.2, 133.7, 131.7, 128.8, 119.3, 97.3, 87.3, 84.9, 27.8

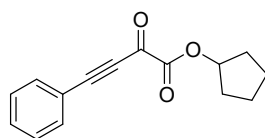

**14l**

Prepared according to the general procedure III above and obtained as yellow oil, eluent: petroleum ether/ethyl acetate (30:1 to 10:1).  $^1\text{H}$  NMR (500 MHz,  $\text{CDCl}_3$ )  $\delta$  7.67 – 7.61 (m, 2H), 7.51 (t,  $J = 7.5$  Hz, 1H), 7.41 (t,  $J = 7.7$  Hz, 2H), 5.41 – 5.30 (m, 1H), 2.01 – 1.93 (m, 2H), 1.90 – 1.79 (m, 4H), 1.70 – 1.62 (m, 2H) ppm.  $^{13}\text{C}$  NMR (126 MHz,  $\text{CDCl}_3$ )  $\delta$  170.0, 159.1, 133.8, 131.8, 128.8, 119.2, 97.7, 87.2, 80.6, 32.6, 23.7.

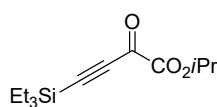

**14m**

Prepared according to the general procedure III above and obtained as yellow oil, eluent: petroleum ether/ethyl acetate (30:1 to 10:1).  $^1\text{H}$  NMR (500 MHz,  $\text{CDCl}_3$ )  $\delta$  5.26 – 5.05 (m, 1H), 1.37 – 1.32 (m, 6H), 1.07 – 0.99 (m, 9H), 0.75 – 0.65 (m, 6H) ppm.  $^{13}\text{C}$  NMR (126 MHz,  $\text{CDCl}_3$ )  $\delta$  169.7, 158.4, 105.1, 101.6, 71.6, 21.5, 7.2, 3.7.

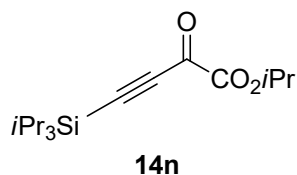

Prepared according to the general procedure III above and obtained as yellow oil, eluent: petroleum ether/ethyl acetate (30:1 to 10:1).  $^1\text{H}$  NMR (500 MHz,  $\text{CDCl}_3$ )  $\delta$  5.21 – 5.12 (m, 1H), 1.35 (s, 3H), 1.34 (s, 3H), 1.12 (d,  $J = 6.0$  Hz, 2H).  $^{13}\text{C}$  NMR (126 MHz,  $\text{CDCl}_3$ )  $\delta$  169.6, 158.3, 104.7, 102.5, 71.5, 21.5, 18.4, 11.0.

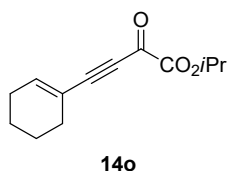

Prepared according to the general procedure III above and obtained as yellow oil, eluent: petroleum ether/ethyl acetate (30:1 to 10:1).  $^1\text{H}$  NMR (500 MHz,  $\text{CDCl}_3$ )  $\delta$  6.68 – 6.53 (m, 1H), 5.19 – 5.06 (m, 1H), 2.22 – 2.16 (m, 4H), 1.67 – 1.59 (m, 4H), 1.35 (s, 3H), 1.33 (s, 3H) ppm.  $^{13}\text{C}$  NMR (126 MHz,  $\text{CDCl}_3$ )  $\delta$  170.1, 159.0, 146.0, 118.9, 100.6, 85.8, 71.4, 27.9, 26.4, 21.8, 21.5, 20.9 ppm

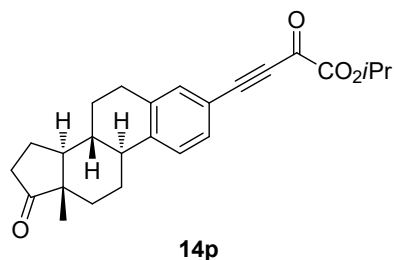

Prepared according to the general procedure III above and obtained as yellow oil, eluent: petroleum ether/ethyl acetate (30:1 to 10:1).  $^1\text{H}$  NMR (500 MHz,  $\text{CDCl}_3$ )  $\delta$  7.49 – 7.38 (m, 2H), 7.34 (d,  $J = 8.1$  Hz, 1H), 5.25 – 5.09 (m, 1H), 2.96 – 2.87 (m, 2H), 2.52 (dd,  $J = 19.0, 8.8$  Hz, 1H), 2.42 (dd,  $J = 12.7, 3.8$  Hz, 1H), 2.37 – 2.30 (m, 1H), 2.15 (dd,  $J = 18.8, 9.0$  Hz, 1H), 2.10 – 1.96 (m, 3H), 1.66 – 1.60 (m, 2H), 1.57 – 1.43 (m,

4H), 1.40 (s, 3H), 1.39 (s, 3H), 0.92 (s, 3H) ppm.  $^{13}\text{C}$  NMR (126 MHz,  $\text{CDCl}_3$ )  $\delta$  170.0, 159.0, 144.6, 137.4, 134.4, 131.2, 125.9, 116.4, 98.7, 87.2, 71.6, 50.5, 47.9, 44.7, 37.7, 35.8, 31.5, 29.0, 26.1, 25.5, 21.6, 13.8 ppm.

#### D) Synthesis of 2-hydroxy-3-enoic acid esters **3**

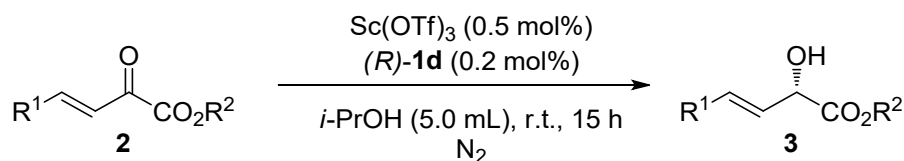

**General procedure IV:** To a 25 mL flask,  $\beta,\gamma$ -unsaturated  $\alpha$ -keto ester **2** (0.5 mmol),  $Sc(OTf)_3$  (0.0025 mmol, 1.23 mg),  $(R)$ -**1d** (0.001 mmol, 0.58 mg) were dissolved in solvent  $i$ -PrOH (5 mL) under nitrogen atmosphere at room temperature. The reaction mixture was stirred for 15 h. Then, the reaction solution was filtrated, and the corresponding solution was concentrated under reduced pressure. Purification of mixture by column chromatography on silica gel (PE/EA = 20:1 to 10:1, v/v) gave the desired products **3**.

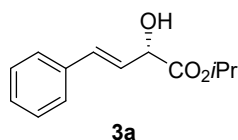

**3a:** Prepared according to the general procedure IV above and obtained as white solid (96 mg, 88% yield, 98% ee, M.P. = 94 °C), eluent: petroleum ether/ethyl acetate (10:1 to 8:1),  $[\alpha]_D^{30} = +39.7$  ( $c = 0.68$ ,  $CH_2Cl_2$ ).  $^1H$  NMR (500 MHz,  $CDCl_3$ )  $\delta$  7.31 (d,  $J = 7.5$  Hz, 2H), 7.24 (t,  $J = 7.5$  Hz, 2H), 7.18 (t,  $J = 7.2$  Hz, 1H), 6.73 (d,  $J = 15.8$  Hz, 1H), 6.17 (dd,  $J = 15.9, 5.4$  Hz, 1H), 5.10 – 4.99 (m, 1H), 4.70 (s, 1H), 3.10 (s, 1H), 1.24 (d,  $J = 6.2$  Hz, 3H), 1.20 (d,  $J = 6.2$  Hz, 3H) ppm.  $^{13}C$  NMR (126 MHz,  $CDCl_3$ )  $\delta$  172.9, 136.3, 132.0, 128.6, 127.9, 126.7, 125.6, 71.3, 70.3, 21.8, 21.7 ppm. IR (KBr,  $cm^{-1}$ ): 3446, 2979, 2928, 1730, 1636, 1450, 1385, 1241, 1201, 1105, 1076, 966, 781, 744, 693, 561. HRMS (ESI) calcd for  $C_{13}H_{16}O_3Na^+$  ( $M+Na$ ) $^+$  243.0997, found 243.0997. Daicel Chiralpak AD-H, n-hexane/2-propanol = 90/10,  $v = 1.0$  mL  $\cdot$  min $^{-1}$ ,  $\lambda = 254$  nm, retention time: 10.6 min (major) and 9.0 min (minor)

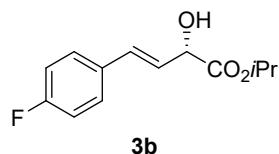

**3b:** Prepared according to the general procedure IV above and obtained as yellow oil (111 mg, 95% yield, 96% ee), eluent: petroleum ether/ethyl acetate (10:1 to 8:1),  $[\alpha]_D^{30} = +30.8$  ( $c = 0.50$ ,  $CH_2Cl_2$ ).  $^1H$  NMR (500 MHz,  $CDCl_3$ )  $\delta$  7.39 – 7.32 (m, 2H), 7.00 (t,



$J = 8.6$  Hz, 2H), 6.77 (d,  $J = 15.9$  Hz, 1H), 6.16 (dd,  $J = 15.8, 5.4$  Hz, 1H), 5.18 – 5.07 (m, 1H), 4.77 (d,  $J = 5.3$  Hz, 1H), 3.20 (s, 1H), 1.31 (d,  $J = 6.3$  Hz, 3H), 1.27 (d,  $J = 6.3$  Hz, 3H) ppm.  $^{13}\text{C}$  NMR (126 MHz,  $\text{CDCl}_3$ )  $\delta$  172.3, 162.0 (d,  $^1J_{\text{C-F}} = 247.0$  Hz), 132.0 (d,  $^4J_{\text{C-F}} = 2.5$  Hz), 130.3, 127.7 (d,  $^3J_{\text{C-F}} = 7.6$  Hz), 124.9 (d,  $^5J_{\text{C-F}} = 1.26$  Hz), 115.0 (d,  $^2J_{\text{C-F}} = 21.4$  Hz), 70.7, 69.8, 21.2, 21.2 ppm. IR (KBr,  $\text{cm}^{-1}$ ): 3386, 2923, 1632, 1383, 1050. HRMS (ESI) calcd for  $\text{C}_{13}\text{H}_{15}\text{FO}_3\text{Na}^+$  ( $\text{M}+\text{Na}$ ) $^+$  261.0903, found 261.0883. Daicel Chiralpak AD-H, n-hexane/2-propanol = 90/10,  $v = 0.8$  mL $\cdot$ min $^{-1}$ ,  $\lambda = 254$  nm, retention time: 11.8 min (major) and 9.3 min (minor).

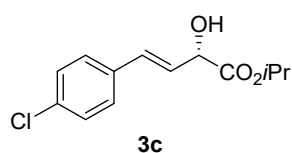

**3c:** Prepared according to the general procedure IV above and obtained as yellow oil (123 mg, 98% yield, 96% ee), eluent: petroleum ether/ethyl acetate (10:1 to 8:1),  $[\alpha]_{\text{D}}^{30} = +52.6$  ( $c = 0.65$ ,  $\text{CH}_2\text{Cl}_2$ ).  $^1\text{H}$  NMR (500 MHz,  $\text{CDCl}_3$ )  $\delta$  7.33 – 7.26 (m, 4H), 6.76 (dd,  $J = 15.9, 1.4$  Hz, 1H), 6.22 (dd,  $J = 15.9, 5.3$  Hz, 1H), 5.19 – 5.05 (m, 1H), 4.77 (s, 1H), 3.21 (s, 1H), 1.31 (d,  $J = 6.3$  Hz, 3H), 1.27 (d,  $J = 6.3$  Hz, 3H) ppm.  $^{13}\text{C}$  NMR (101 MHz,  $\text{CDCl}_3$ )  $\delta$  172.7, 134.8, 133.6, 130.6, 128.8, 127.9, 126.3, 71.1, 70.4, 21.8, 21.8 ppm. IR (KBr,  $\text{cm}^{-1}$ ): 3385, 2922, 1646, 1384, 1049. HRMS (ESI) calcd for  $\text{C}_{13}\text{H}_{15}\text{ClO}_3\text{Na}^+$  ( $\text{M}+\text{Na}$ ) $^+$  277.0606, found 277.0607. Daicel Chiralpak AD-H, n-hexane/2-propanol = 90/10,  $v = 1.0$  mL $\cdot$ min $^{-1}$ ,  $\lambda = 254$  nm, retention time: 15.0 min (major) and 10.6 min (minor)

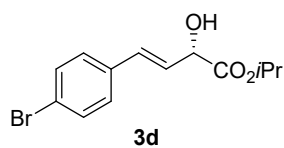

**3d:** Prepared according to the general procedure IV above and obtained as yellow solid (143 mg, 96% yield, 92% ee), eluent: petroleum ether/ethyl acetate (10:1 to 8:1),  $[\alpha]_{\text{D}}^{30} = +55.9$  ( $c = 0.59$ ,  $\text{CH}_2\text{Cl}_2$ ).  $^1\text{H}$  NMR (500 MHz,  $\text{CDCl}_3$ )  $\delta$  7.44 (d,  $J = 8.4$  Hz, 2H), 7.25 (d,  $J = 8.4$  Hz, 2H), 6.75 (d,  $J = 15.9$  Hz, 1H), 6.24 (dd,  $J = 15.9, 5.2$  Hz, 1H), 5.19 – 5.07 (m, 1H), 4.76 (s, 1H), 3.14 (s, 1H), 1.32 (d,  $J = 6.3$  Hz, 3H), 1.28 (d,  $J = 6.3$  Hz, 3H) ppm.  $^{13}\text{C}$  NMR (126 MHz,  $\text{CDCl}_3$ )  $\delta$  172.6, 135.2, 131.7, 130.7, 126.4, 121.8, 71.2,

70.4, 21.7. IR (KBr,  $\text{cm}^{-1}$ ): 3386, 2923, 1383, 1050. HRMS (ESI) calcd for  $\text{C}_{13}\text{H}_{15}\text{BrO}_3\text{Na}^+$  ( $\text{M}+\text{Na}$ ) $^+$  321.0102, found 321.0115. Daicel Chiralpak AD-H, n-hexane/2-propanol = 90/10,  $v = 1.0 \text{ mL}\cdot\text{min}^{-1}$ ,  $\lambda = 254 \text{ nm}$ , retention time: 15.2 min (major) and 10.7 min (minor)

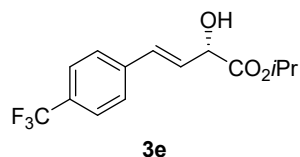

**3e:** Prepared according to the general procedure IV above and obtained as yellow oil (139 mg, 97% yield, 90% ee), eluent: petroleum ether/ethyl acetate (10:1 to 8:1),  $[\alpha]_{\text{D}}^{30} = +23.3$  ( $c = 2.16$ ,  $\text{CH}_2\text{Cl}_2$ ).  $^1\text{H}$  NMR (500 MHz,  $\text{CDCl}_3$ )  $\delta$  7.56 (d,  $J = 8.2 \text{ Hz}$ , 2H), 7.47 (d,  $J = 8.0 \text{ Hz}$ , 2H), 6.86 (dd,  $J = 15.8, 2.1 \text{ Hz}$ , 1H), 6.35 (dd,  $J = 15.9, 5.1 \text{ Hz}$ , 1H), 5.21 – 5.03 (m, 1H), 4.90 – 4.71 (m, 1H), 3.28 (d,  $J = 5.6 \text{ Hz}$ , 1H), 1.32 (d,  $J = 6.3 \text{ Hz}$ , 3H), 1.28 (d,  $J = 6.2 \text{ Hz}$ , 3H) ppm.  $^{13}\text{C}$  NMR (126 MHz,  $\text{CDCl}_3$ )  $\delta$  172.5, 139.8, 130.3, 129.7 (q,  $J = 32.5 \text{ Hz}$ ), 128.3, 126.8, 125.6 (q,  $J = 4.0 \text{ Hz}$ ), 124.1 (q,  $J = 271.8 \text{ Hz}$ ), 100.0, 71.1, 70.5, 21.7 ppm. IR (KBr,  $\text{cm}^{-1}$ ): 3442, 3051, 2989, 2936, 1732, 1670, 1626, 1577, 1458, 1418, 1378, 1366, 1326, 1169, 1129, 1102, 1069, 991, 843, 645. HRMS (ESI) calcd for  $\text{C}_{14}\text{H}_{15}\text{F}_3\text{O}_3\text{Na}^+$  ( $\text{M}+\text{Na}$ ) $^+$  311.0871, found 311.0879. Daicel Chiralpak AD-H, n-hexane/2-propanol = 80/20,  $v = 0.8 \text{ mL}\cdot\text{min}^{-1}$ ,  $\lambda = 254 \text{ nm}$ , retention time: 19.1 min (major) and 13.9 min (minor).

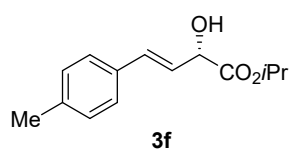

**3f:** Prepared according to the general procedure IV above and obtained as yellow oil (113 mg, 97% yield, 98% ee), eluent: petroleum ether/ethyl acetate (10:1 to 8:1),  $[\alpha]_{\text{D}}^{30} = +17.9$  ( $c = 0.98$ ,  $\text{CH}_2\text{Cl}_2$ ).  $^1\text{H}$  NMR (500 MHz,  $\text{CDCl}_3$ )  $\delta$  7.29 (d,  $J = 8.0 \text{ Hz}$ , 2H), 7.13 (d,  $J = 7.9 \text{ Hz}$ , 2H), 6.82 – 6.73 (m, 1H), 6.19 (dd,  $J = 15.8, 5.6 \text{ Hz}$ , 1H), 5.17 – 5.08 (m, 1H), 4.77 (s, 1H), 3.12 (d,  $J = 4.9 \text{ Hz}$ , 1H), 2.34 (s, 3H), 1.31 (d,  $J = 6.3 \text{ Hz}$ , 3H), 1.27 (d,  $J = 6.3 \text{ Hz}$ , 3H) ppm.  $^{13}\text{C}$  NMR (126 MHz,  $\text{CDCl}_3$ )  $\delta$  173.0, 137.9, 133.5, 131.9, 129.3, 126.6, 124.6, 71.4, 70.2, 21.8, 21.7, 21.2 ppm. IR (KBr,  $\text{cm}^{-1}$ ): 3386, 2923, 2853, 1632, 1383, 1049. HRMS (ESI) calcd for  $\text{C}_{14}\text{H}_{18}\text{O}_3\text{Na}^+$  ( $\text{M}+\text{Na}$ ) $^+$  257.1154, found

257.1160. Daicel Chiralpak AD-H, n-hexane/2-propanol = 90/10,  $v = 0.8 \text{ mL} \cdot \text{min}^{-1}$ ,  $\lambda = 254 \text{ nm}$ , retention time: 12.0 min (major) and 9.8 min (minor).

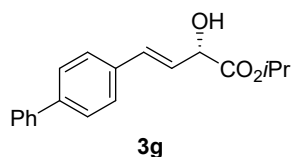

**3g:** Prepared according to the general procedure IV above and obtained as white solid (137 mg, 93% yield, 96% ee, M.P. = 92 °C), eluent: petroleum ether/ethyl acetate (10:1 to 8:1),  $[\alpha]_{\text{D}}^{30} = +91.5$  ( $c = 0.32$ ,  $\text{CH}_2\text{Cl}_2$ ).  $^1\text{H NMR}$  (400 MHz,  $\text{CDCl}_3$ )  $\delta$  7.59 (dd,  $J = 11.1, 7.9 \text{ Hz}$ , 4H), 7.46 (dd,  $J = 15.3, 8.0 \text{ Hz}$ , 4H), 7.36 (t,  $J = 7.3 \text{ Hz}$ , 1H), 6.87 (d,  $J = 16.9 \text{ Hz}$ , 1H), 6.31 (dd,  $J = 15.9, 5.4 \text{ Hz}$ , 1H), 5.22 – 5.09 (m, 1H), 4.84 (dd,  $J = 5.4, 1.4 \text{ Hz}$ , 1H), 3.26 (d,  $J = 11.1 \text{ Hz}$ , 1H), 1.34 (d,  $J = 6.3 \text{ Hz}$ , 3H), 1.31 (d,  $J = 6.3 \text{ Hz}$ , 3H) ppm.  $^{13}\text{C NMR}$  (101 MHz,  $\text{CDCl}_3$ )  $\delta$  171.8, 139.7, 139.5, 134.3, 130.5, 127.8, 126.3, 126.2, 126.1, 125.9, 124.7, 70.3, 69.2, 20.7, 20.7 ppm. IR (KBr,  $\text{cm}^{-1}$ ): 3446, 3029, 2981, 2932, 1729, 1488, 1465, 1450, 1408, 1385, 1375, 1288, 1206, 1106, 1076, 1006, 968, 952, 829, 755, 692 ppm. HRMS (ESI) calcd for  $\text{C}_{19}\text{H}_{20}\text{O}_3\text{Na}^+$  ( $\text{M}+\text{Na}$ ) $^+$  319.1310, found 319.1306. Daicel Chiralpak AD-H, n-hexane/2-propanol = 90/10,  $v = 1.0 \text{ mL} \cdot \text{min}^{-1}$ ,  $\lambda = 254 \text{ nm}$ , retention time: 16.3 min (major) and 12.9 min (minor).

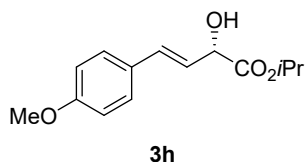

**3h:** Prepared according to the general procedure IV above and obtained as yellow oil (118 mg, 95% yield, 99% ee), eluent: petroleum ether/ethyl acetate (10:1 to 8:1),  $[\alpha]_{\text{D}}^{30} = +44.39$  ( $c = 0.89$ , in  $\text{CH}_2\text{Cl}_2$ ).  $^1\text{H NMR}$  (500 MHz,  $\text{CDCl}_3$ )  $\delta$  7.32 (d,  $J = 8.6 \text{ Hz}$ , 2H), 6.86 (d,  $J = 8.6 \text{ Hz}$ , 2H), 6.74 (d,  $J = 15.8 \text{ Hz}$ , 1H), 6.09 (dd,  $J = 15.8, 5.7 \text{ Hz}$ , 1H), 5.12 (hept,  $J = 6.3 \text{ Hz}$ , 1H), 4.75 (t,  $J = 5.2 \text{ Hz}$ , 1H), 3.81 (s, 3H), 3.12 (d,  $J = 5.8 \text{ Hz}$ , 1H), 1.31 (d,  $J = 6.3 \text{ Hz}$ , 3H), 1.27 (d,  $J = 6.3 \text{ Hz}$ , 3H) ppm.  $^{13}\text{C NMR}$  (100 MHz,  $\text{CDCl}_3$ )  $\delta$  173.1, 159.5, 131.6, 129.0, 127.9, 123.4, 114.0, 71.4, 70.1, 55.3, 21.8, 21.7 ppm. IR (KBr,  $\text{cm}^{-1}$ ): 3418, 2922, 1730, 1632, 1513, 1252, 1069. HRMS (ESI) calcd for  $\text{C}_{14}\text{H}_{18}\text{O}_4\text{Na}^+$  ( $\text{M}+\text{Na}$ ) $^+$  273.1103, found 273.1107. Daicel Chiralpak AD-H, n-hexane/2-propanol = 90/10,  $v = 0.8 \text{ mL} \cdot \text{min}^{-1}$ ,  $\lambda = 254 \text{ nm}$ , retention time: 17.9 min

(major) and 14.1 min (minor).

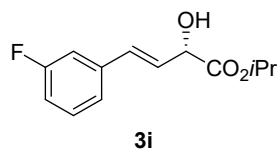

**3i:** Prepared according to the general procedure IV above and obtained as yellow solid (108 mg, 91% yield, 90% ee, M.P. = 70 °C), eluent: petroleum ether/ethyl acetate (10:1 to 8:1),  $[\alpha]_D^{30} = +31.1$  ( $c = 1.19$ ,  $\text{CH}_2\text{Cl}_2$ ).  $^1\text{H NMR}$  (400 MHz,  $\text{CDCl}_3$ )  $\delta$  7.23 – 7.17 (m, 1H), 7.06 (d,  $J = 7.7$  Hz, 1H), 7.03 – 6.98 (m, 1H), 6.91 – 6.84 (m, 1H), 6.71 (dd,  $J = 15.9, 1.3$  Hz, 1H), 6.18 (dd,  $J = 15.8, 5.2$  Hz, 1H), 5.12 – 4.98 (m, 1H), 4.71 (s, 1H), 3.17 (d,  $J = 4.3$  Hz, 1H), 1.24 (d,  $J = 6.3$  Hz, 3H), 1.20 (d,  $J = 6.3$  Hz, 3H) ppm.  $^{13}\text{C NMR}$  (101 MHz,  $\text{CDCl}_3$ )  $\delta$  172.6, 163.1 (d,  $^1J_{\text{C-F}} = 246.4$  Hz), 138.6 (d  $^3J_{\text{C-F}} = 8.1$  Hz), 130.6 (d,  $^4J_{\text{C-F}} = 3.0$  Hz), 130.1 (d,  $^3J_{\text{C-F}} = 8.1$  Hz), 127.0, 122.6 (d,  $^4J_{\text{C-F}} = 3.0$  Hz), 114.7 (d,  $^2J_{\text{C-F}} = 22.2$  Hz), 113.1 (d,  $^2J_{\text{C-F}} = 22.2$  Hz), 71.1, 70.4, 21.8, 21.7 ppm. IR (KBr,  $\text{cm}^{-1}$ ): 3444, 3082, 2983, 2933, 1729, 1611, 1582, 1489, 1447, 1386, 1261, 1205, 1139, 1104, 1071, 965, 843, 683. HRMS (ESI) calcd for  $\text{C}_{13}\text{H}_{15}\text{FO}_3\text{Na}^+$  ( $\text{M}+\text{Na}$ ) $^+$  261.0903, found 261.0898. Daicel Chiralpak AD-H, n-hexane/2-propanol = 80/20,  $v = 0.8$   $\text{mL}\cdot\text{min}^{-1}$ ,  $\lambda = 254$  nm, retention time: 9.1 min (major) and 7.9 min (minor)

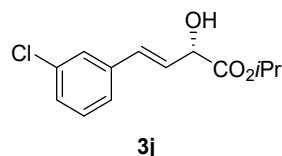

**3j:** Prepared according to the general procedure IV above and obtained as yellow oil (117 mg, 92% yield, 89% ee), eluent: petroleum ether/ethyl acetate (10:1 to 8:1),  $[\alpha]_D^{30} = +27.8$  ( $c = 0.49$ ,  $\text{CH}_2\text{Cl}_2$ ).  $^1\text{H NMR}$  (500 MHz,  $\text{CDCl}_3$ )  $\delta$  7.37 (s, 1H), 7.28 – 7.19 (m, 3H), 6.76 (d,  $J = 15.9$  Hz, 1H), 6.26 (dd,  $J = 15.8, 5.2$  Hz, 1H), 5.23 – 5.06 (m, 1H), 4.79 (s, 1H), 3.23 (s, 1H), 1.32 (d,  $J = 6.3$  Hz, 3H), 1.28 (d,  $J = 6.2$  Hz, 3H) ppm.  $^{13}\text{C NMR}$  (126 MHz,  $\text{CDCl}_3$ )  $\delta$  172.1, 137.7, 134.1, 129.9, 129.3, 127.4, 126.7, 126.0, 124.5, 70.6, 69.9, 21.2, 21.2 ppm. IR (KBr,  $\text{cm}^{-1}$ ): 3443, 2983, 2923, 1729, 1695, 1607, 1567, 1555, 1470, 1454, 1431, 1375, 1255, 1201, 1100, 1078, 907, 784, 684. HRMS (ESI) calcd for  $\text{C}_{13}\text{H}_{15}\text{ClO}_3\text{Na}^+$  ( $\text{M}+\text{Na}$ ) $^+$  277.0607, found 277.0614. Daicel Chiralpak AD-H, n-hexane/2-propanol = 80/20,  $v = 0.8$   $\text{mL}\cdot\text{min}^{-1}$ ,  $\lambda = 254$  nm, retention time: 9.1

min (major) and 7.8 min (minor).

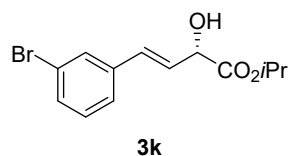

**3k:** Prepared according to the general procedure IV above and obtained as yellow oil (140 mg, 94% yield, 95% ee), eluent: petroleum ether/ethyl acetate (10:1 to 8:1),  $[\alpha]_D^{30} = +32.3$  ( $c = 0.39$ ,  $\text{CH}_2\text{Cl}_2$ ).  $^1\text{H NMR}$  (500 MHz,  $\text{CDCl}_3$ )  $\delta$  7.52 (s, 1H), 7.36 (d,  $J = 7.9$  Hz, 1H), 7.28 (d,  $J = 7.7$  Hz, 1H), 7.17 (t,  $J = 7.8$  Hz, 1H), 6.74 (d,  $J = 15.8$  Hz, 1H), 6.25 (dd,  $J = 15.8, 5.2$  Hz, 1H), 5.16 – 5.07 (m, 1H), 4.79 (dd,  $J = 5.1, 1.5$  Hz, 1H), 3.31 (s, 1H), 1.29 (dd,  $J = 17.6, 6.3$  Hz, 6H) ppm.  $^{13}\text{C NMR}$  (126 MHz,  $\text{CDCl}_3$ )  $\delta$  172.1, 138.0, 130.3, 129.8, 129.6, 128.9, 126.7, 124.9, 122.3, 70.6, 69.9, 21.3 ppm. IR (KBr,  $\text{cm}^{-1}$ ): 3442, 2979, 2926, 1730, 1591, 1561, 1469, 1376, 1261, 1203, 1103, 1071, 966, 905, 788, 761, 680. HRMS (ESI) calcd for  $\text{C}_{13}\text{H}_{15}\text{BrO}_3\text{Na}^+$  ( $\text{M}+\text{Na}$ ) $^+$  321.0102, found 321.0081. Daicel Chiralpak AD-H, n-hexane/2-propanol = 80/20,  $v = 0.8$   $\text{mL}\cdot\text{min}^{-1}$ ,  $\lambda = 254$  nm, retention time: 9.6 min (major) and 8.1 min (minor).

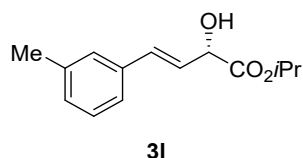

**3l:** Prepared according to the general procedure IV above and obtained as yellow oil (114 mg, yield 98%, ee 97%), eluent: petroleum ether/ethyl acetate (10:1 to 8:1),  $[\alpha]_D^{30} = +55.1$  ( $c = 0.37$ ,  $\text{CH}_2\text{Cl}_2$ ).  $^1\text{H NMR}$  (400 MHz,  $\text{CDCl}_3$ )  $\delta$  7.21 (d,  $J = 6.1$  Hz, 3H), 7.13 – 7.06 (m, 1H), 6.78 (dd,  $J = 15.9, 1.6$  Hz, 1H), 6.23 (dd,  $J = 15.9, 5.5$  Hz, 1H), 5.20 – 5.07 (m, 1H), 4.79 (s, 1H), 3.23 (d,  $J = 4.5$  Hz, 1H), 2.35 (s, 3H), 1.32 (d,  $J = 6.3$  Hz, 3H), 1.28 (d,  $J = 6.3$  Hz, 3H) ppm.  $^{13}\text{C NMR}$  (101 MHz,  $\text{CDCl}_3$ )  $\delta$  173.0, 138.2, 136.2, 132.1, 128.8, 128.5, 127.4, 125.4, 123.8, 71.4, 70.2, 21.8, 21.8, 21.4 ppm. IR (KBr,  $\text{cm}^{-1}$ ): 3421, 2968, 2922, 1382, 1253, 1066, 895. HRMS (ESI) calcd for  $\text{C}_{14}\text{H}_{18}\text{O}_3\text{Na}^+$  ( $\text{M}+\text{Na}$ ) $^+$  257.1154, found 257.1165. Daicel Chiralpak AD-H, n-hexane/2-propanol = 80/20,  $v = 0.8$   $\text{mL}\cdot\text{min}^{-1}$ ,  $\lambda = 254$  nm, retention time: 8.5 min (major) and 7.4 min (minor).

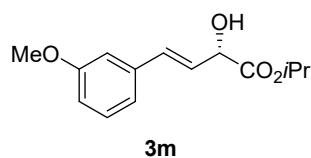

**3m:** Prepared according to the general procedure IV above and obtained as yellow oil (121 mg, 97% yield, 94% ee), eluent: petroleum ether/ethyl acetate (10:1 to 8:1),  $[\alpha]_D^{30} = +31.1$  ( $c = 0.30$ ,  $\text{CH}_2\text{Cl}_2$ ).  $^1\text{H NMR}$  (400 MHz,  $\text{CDCl}_3$ )  $\delta$  7.19 – 7.13 (m, 1H), 6.91 (d,  $J = 7.7$  Hz, 1H), 6.87 – 6.83 (m, 1H), 6.76 – 6.67 (m, 2H), 6.16 (dd,  $J = 15.8, 5.4$  Hz, 1H), 5.11 – 5.00 (m, 1H), 4.70 (t,  $J = 4.2$  Hz, 1H), 3.74 (s, 3H), 3.10 (d,  $J = 5.5$  Hz, 1H), 1.24 (d,  $J = 6.3$  Hz, 3H), 1.20 (d,  $J = 6.3$  Hz, 3H) ppm.  $^{13}\text{C NMR}$  (101 MHz,  $\text{CDCl}_3$ )  $\delta$  172.9, 159.8, 137.8, 137.7, 131.8, 129.6, 126.0, 119.3, 113.5, 112.1, 71.3, 70.3, 55.2, 21.8, 21.7 ppm. IR (KBr,  $\text{cm}^{-1}$ ): 3444, 2981, 2934, 1729, 1603, 1581, 1489, 1455, 1433, 1375, 1266, 1157, 1102, 1045, 971, 777, 689. HRMS (ESI) calcd for  $\text{C}_{14}\text{H}_{18}\text{O}_4\text{Na}^+$  ( $\text{M}+\text{Na}$ ) $^+$  273.1103, found 273.1107. Daicel Chiralpak AD-H, n-hexane/2-propanol = 80/20,  $v = 0.8$   $\text{mL} \cdot \text{min}^{-1}$ ,  $\lambda = 254$  nm, retention time: 12.6 min (major) and 10.9 min (minor).

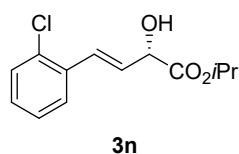

**3n:** Prepared according to the general procedure IV above and obtained as yellow solid (118 mg, 93% yield, 97% ee, M.P. = 98 °C), eluent: petroleum ether/ethyl acetate (10:1 to 8:1),  $[\alpha]_D^{30} = +41.6$  ( $c = 0.38$ ,  $\text{CH}_2\text{Cl}_2$ ).  $^1\text{H NMR}$  (500 MHz,  $\text{CDCl}_3$ )  $\delta$  7.49 (dd,  $J = 7.5, 1.7$  Hz, 1H), 7.34 (dd,  $J = 7.6, 1.5$  Hz, 1H), 7.23 – 7.13 (m, 3H), 6.24 (dd,  $J = 15.9, 5.3$  Hz, 1H), 5.20 – 5.07 (m, 1H), 4.83 (t,  $J = 4.6$  Hz, 1H), 3.37 (d,  $J = 5.8$  Hz, 1H), 1.31 (d,  $J = 6.3$  Hz, 3H), 1.28 (d,  $J = 6.3$  Hz, 3H) ppm.  $^{13}\text{C NMR}$  (126 MHz,  $\text{CDCl}_3$ )  $\delta$  172.6, 134.5, 133.4, 129.7, 128.9, 128.7, 128.2, 127.1, 126.8, 71.4, 70.3, 21.8, 21.7 ppm. IR (KBr,  $\text{cm}^{-1}$ ): 3442, 2981, 2935, 1727, 1467, 1433, 1385, 1290, 1203, 1144, 1104, 1072, 965, 776, 755, 684. HRMS (ESI) calcd for  $\text{C}_{13}\text{H}_{15}\text{ClO}_3\text{Na}^+$  ( $\text{M}+\text{Na}$ ) $^+$  277.0607, found 277.0606. Daicel Chiralpak AD-H, n-hexane/2-propanol = 80/20,  $v = 0.8$   $\text{mL} \cdot \text{min}^{-1}$ ,  $\lambda = 254$  nm, retention time: 15.7 min (major) and 14.0 min (minor).

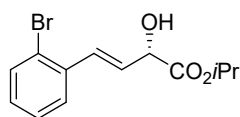

**3o**

**3o:** Prepared according to the general procedure IV above and obtained as yellow solid (139 mg, 93% yield, 97% ee, M.P. = 53 °C), eluent: petroleum ether/ethyl acetate (10:1 to 8:1),  $[\alpha]_D^{30} = +71.0$  ( $c = 0.29$ ,  $\text{CH}_2\text{Cl}_2$ ).  $^1\text{H NMR}$  (500 MHz,  $\text{CDCl}_3$ )  $\delta$  7.58 (d,  $J = 8.0$  Hz, 1H), 7.51 (d,  $J = 7.8$  Hz, 1H), 7.29 (t,  $J = 7.5$  Hz, 1H), 7.22 – 7.11 (m, 2H), 6.24 (dd,  $J = 15.8, 5.3$  Hz, 1H), 5.23 – 5.11 (m, 1H), 4.87 (s, 1H), 3.43 – 3.29 (m, 1H), 1.36 (d,  $J = 6.3$  Hz, 3H), 1.32 (d,  $J = 6.3$  Hz, 3H) ppm.  $^{13}\text{C NMR}$  (126 MHz,  $\text{CDCl}_3$ )  $\delta$  172.6, 136.3, 133.0, 130.9, 129.2, 128.9, 127.5, 127.3, 123.9, 71.3, 70.3, 21.8 ppm. IR (KBr,  $\text{cm}^{-1}$ ): 3436, 2979, 2928, 1725, 1463, 1374, 1277, 1200, 1101, 1070, 962, 775, 748, 662, 562. HRMS (ESI) calcd for  $\text{C}_{13}\text{H}_{15}\text{BrO}_3\text{Na}^+$  ( $\text{M}+\text{Na}$ ) $^+$  321.0102, found 321.0103. Daicel Chiralpak AD-H, n-hexane/2-propanol = 80/20,  $v = 0.8$  mL $\cdot$ min $^{-1}$ ,  $\lambda = 254$  nm, retention time: 15.8 min (major) and 14.3 min (minor).

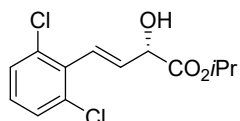

**3p**

**3o:** Prepared according to the general procedure IV above and obtained as yellow oil (134 mg, 93% yield, 78% ee), eluent: petroleum ether/ethyl acetate (10:1 to 8:1),  $[\alpha]_D^{30} = +31.9$  ( $c = 0.37$ ,  $\text{CH}_2\text{Cl}_2$ ).  $^1\text{H NMR}$  (500 MHz,  $\text{CDCl}_3$ )  $\delta$  7.30 (d,  $J = 8.0$  Hz, 2H), 7.09 (t,  $J = 8.0$  Hz, 1H), 6.82 (dd,  $J = 16.2, 1.7$  Hz, 1H), 6.31 (dd,  $J = 16.2, 5.0$  Hz, 1H), 5.20 – 5.10 (m, 1H), 4.84 (dd,  $J = 4.9, 1.7$  Hz, 1H), 3.21 (s, 1H), 1.32 (d,  $J = 6.3$  Hz, 3H), 1.28 (d,  $J = 6.2$  Hz, 3H) ppm.  $^{13}\text{C NMR}$  (126 MHz,  $\text{CDCl}_3$ )  $\delta$  172.5, 134.5, 134.4, 133.9, 128.4, 128.4, 125.3, 71.2, 70.4, 21.8, 21.7 ppm. IR (KBr,  $\text{cm}^{-1}$ ): 3359, 2921, 2359, 2339, 1648, 1555, 1383, 1254, 1066, 669. HRMS (ESI) calcd for  $\text{C}_{13}\text{H}_{14}\text{Cl}_2\text{O}_3\text{Na}^+$  ( $\text{M}+\text{Na}$ ) $^+$  311.0218, found 311.0210. HPLC analysis: Daicel Chiralpak AD-H, n-hexane/2-propanol = 80/20,  $v = 0.8$  mL $\cdot$ min $^{-1}$ ,  $\lambda = 254$  nm, retention time: 8.2 min (major) and 7.6 min (minor).

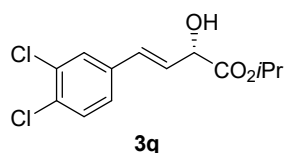

**3q:** Prepared according to the general procedure IV above and obtained as yellow oil (134 mg, 93% yield, 92% ee, M.P. = 58 °C), eluent: petroleum ether/ethyl acetate (10:1 to 8:1),  $[\alpha]_D^{30} = +53.0$  ( $c = 0.23$ ,  $\text{CH}_2\text{Cl}_2$ ).  $^1\text{H NMR}$  (500 MHz,  $\text{CDCl}_3$ )  $\delta$  7.46 (d,  $J = 1.8$  Hz, 1H), 7.38 (d,  $J = 8.3$  Hz, 1H), 7.20 (dd,  $J = 8.3, 1.9$  Hz, 1H), 6.73 (dd,  $J = 15.8, 1.4$  Hz, 1H), 6.25 (dd,  $J = 15.8, 5.1$  Hz, 1H), 5.20 – 5.09 (m, 1H), 4.78 (d,  $J = 3.7$  Hz, 1H), 3.18 (s, 1H), 1.32 (d,  $J = 6.3$  Hz, 3H), 1.28 (d,  $J = 6.3$  Hz, 3H) ppm.  $^{13}\text{C NMR}$  (126 MHz,  $\text{CDCl}_3$ )  $\delta$  171.9, 135.9, 132.2, 131.1, 130.0, 128.9, 127.8, 127.1, 125.4, 70.4, 70.1, 21.3 ppm. IR (KBr,  $\text{cm}^{-1}$ ): 3433, 2981, 2920, 2128, 1719, 1719, 1692, 1605, 1553, 1469, 1375, 1248, 1204, 1131, 1079, 968, 827, 786, 686. HRMS (ESI) calcd for  $\text{C}_{13}\text{H}_{14}\text{Cl}_2\text{O}_3\text{Na}^+$  ( $\text{M}+\text{Na}$ ) $^+$  311.0218, found 311.0228. Daicel Chiralpak AD-H, n-hexane/2-propanol = 80/20,  $v = 0.8$   $\text{mL}\cdot\text{min}^{-1}$ ,  $\lambda = 254$  nm, retention time: 17.9 min (major) and 13.8 min (minor).

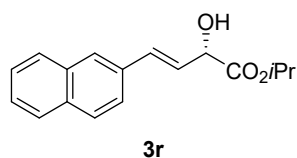

**3r:** Prepared according to the general procedure IV above and obtained as yellow oil (109 mg, 81% yield, 98% ee), eluent: petroleum ether/ethyl acetate (10:1 to 8:1),  $[\alpha]_D^{30} = +100.0$  ( $c = 0.10$ , in  $\text{CH}_2\text{Cl}_2$ ).  $^1\text{H NMR}$  (500 MHz,  $\text{CDCl}_3$ )  $\delta$  7.79 (dd,  $J = 17.4, 9.0$  Hz, 4H), 7.59 (d,  $J = 8.5$  Hz, 1H), 7.50 – 7.41 (m, 2H), 6.99 (d,  $J = 15.8$  Hz, 1H), 6.38 (dd,  $J = 15.8, 5.4$  Hz, 1H), 5.20 – 5.11 (m, 1H), 4.85 (d,  $J = 5.1$  Hz, 1H), 3.24 (s, 1H), 1.34 (d,  $J = 6.2$  Hz, 3H), 1.30 (d,  $J = 6.2$  Hz, 3H) ppm.  $^{13}\text{C NMR}$  (126 MHz,  $\text{CDCl}_3$ )  $\delta$  172.9, 133.7, 133.5, 133.2, 132.1, 128.3, 128.1, 127.7, 126.9, 126.4, 126.1, 126.0, 123.6, 71.4, 70.3, 21.8, 21.8 ppm. IR (KBr,  $\text{cm}^{-1}$ ): 3466, 2977, 1745, 1722, 1687, 1602, 1590, 1366, 1302, 1243, 1114, 1085, 994, 862, 819, 787, 750, 700. HRMS (ESI) calcd for  $\text{C}_{17}\text{H}_{18}\text{O}_3\text{Na}^+$  ( $\text{M}+\text{Na}$ ) $^+$  293.1154, found 293.1153. Daicel Chiralpak AD-H, n-hexane/2-propanol = 80/20,  $v = 0.8$   $\text{mL}\cdot\text{min}^{-1}$ ,  $\lambda = 254$  nm, retention time: 14.2 min (major) and 12.0 min (minor).



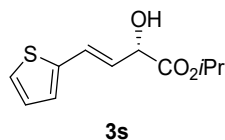

**3s:** Prepared according to the general procedure IV above and obtained as yellow oil (104 mg, 92% yield, 94% ee), eluent: petroleum ether/ethyl acetate (10:1 to 8:1),  $[\alpha]_D^{30} = +48.1$  ( $c = 0.89$ , in  $\text{CH}_2\text{Cl}_2$ ).  $^1\text{H NMR}$  (500 MHz,  $\text{CDCl}_3$ )  $\delta$  7.17 (d,  $J = 4.9$  Hz, 1H), 7.00 – 6.89 (m, 3H), 6.08 (dd,  $J = 15.6, 5.3$  Hz, 1H), 5.16 – 5.06 (m, 1H), 4.73 (s, 1H), 3.20 (s, 1H), 1.31 (d,  $J = 6.2$  Hz, 3H), 1.27 (d,  $J = 6.2$  Hz, 3H) ppm.  $^{13}\text{C NMR}$  (126 MHz,  $\text{CDCl}_3$ )  $\delta$  172.2, 140.8, 127.0, 125.9, 124.5, 124.5, 124.2, 70.5, 69.8, 21.2, 21.2 ppm. IR (KBr,  $\text{cm}^{-1}$ ): 3421, 2922, 1633, 1393, 1066. HRMS (ESI) calcd for  $\text{C}_{11}\text{H}_{14}\text{O}_3\text{SNa}^+$  ( $\text{M}+\text{Na}$ ) $^+$  249.0561, found 249.0560. Daicel Chiralpak AD-H, n-hexane/2-propanol = 90/10,  $v = 1.0$   $\text{mL}\cdot\text{min}^{-1}$ ,  $\lambda = 254$  nm, retention time: 11.5 min (major) and 9.1 min (minor).

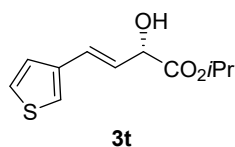

**3t:** Prepared according to the general procedure IV above and obtained as yellow solid (105 mg, 93% yield, 98% ee, M.P. = 60 °C), eluent: petroleum ether/ethyl acetate (10:1 to 8:1);  $[\alpha]_D^{30} = +96.3$  ( $c = 0.11$ ,  $\text{CH}_2\text{Cl}_2$ ).  $^1\text{H NMR}$  (400 MHz,  $\text{CDCl}_3$ )  $\delta$  7.20 (dd,  $J = 5.2, 3.1$  Hz, 1H), 7.14 – 7.10 (m, 2H), 6.73 (dd,  $J = 15.8, 1.3$  Hz, 1H), 6.02 (dd,  $J = 15.8, 5.5$  Hz, 1H), 5.10 – 4.99 (m, 1H), 4.67 (dd,  $J = 5.5, 1.5$  Hz, 1H), 3.08 (s, 1H), 1.24 (d,  $J = 6.3$  Hz, 3H), 1.20 (d,  $J = 6.3$  Hz, 3H) ppm.  $^{13}\text{C NMR}$  (101 MHz,  $\text{CDCl}_3$ )  $\delta$  172.9, 138.9, 126.2, 126.1, 125.4, 125.1, 123.0, 71.2, 70.2, 21.8, 21.7 ppm. IR (KBr,  $\text{cm}^{-1}$ ): 3440, 2976, 2918, 2849, 1730, 1464, 1376, 1198, 1102, 1069, 963, 866, 791, 627. HRMS (ESI) calcd for  $\text{C}_{11}\text{H}_{14}\text{O}_3\text{SNa}^+$  ( $\text{M}+\text{Na}$ ) $^+$  249.0561, found 249.0561. Daicel Chiralpak AD-H, n-hexane/2-propanol = 80/20,  $v = 0.8$   $\text{mL}\cdot\text{min}^{-1}$ ,  $\lambda = 254$  nm, retention time: 15.4 min (major) and 12.2 min (minor).

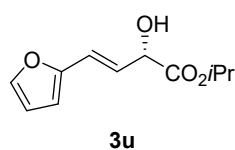

**3u:** Prepared according to the general procedure IV above and obtained as yellow oil

(84 mg, 82% yield, 93% ee), eluent: petroleum ether/ethyl acetate (10:1 to 8:1),  $[\alpha]_D^{30} = +78.0$  ( $c = 0.1$ , in  $\text{CH}_2\text{Cl}_2$ ).  $^1\text{H NMR}$  (500 MHz,  $\text{CDCl}_3$ )  $\delta$  7.35 (t,  $J = 2.8$  Hz, 1H), 6.62 (dd,  $J = 15.7, 1.9$  Hz, 1H), 6.37 (dd,  $J = 3.4, 1.9$  Hz, 1H), 6.28 – 6.15 (m, 2H), 5.15 – 5.06 (m, 1H), 4.75 (d,  $J = 3.3$  Hz, 1H), 3.14 (s, 1H), 1.31 (d,  $J = 6.1$  Hz, 3H), 1.28 (d,  $J = 6.3$  Hz, 3H) ppm.  $^{13}\text{C NMR}$  (126 MHz,  $\text{CDCl}_3$ )  $\delta$  172.8, 152.1, 142.2, 124.1, 119.8, 111.4, 108.9, 100.0, 70.8, 70.3, 21.7, 21.7 ppm. IR (KBr,  $\text{cm}^{-1}$ ): 3398, 2918, 2849, 2297, 2100, 1725, 1463, 1375, 1260, 1102, 965, 820, 742. HRMS (ESI) calcd for  $\text{C}_{11}\text{H}_{14}\text{O}_4\text{Na}^+$  ( $\text{M}+\text{Na}$ ) $^+$  233.0790, found 233.0786. Daicel Chiralpak AD-H, n-hexane/2-propanol = 80/20,  $v = 0.8$   $\text{mL}\cdot\text{min}^{-1}$ ,  $\lambda = 254$  nm, retention time: 10.2 min (major) and 8.9 min (minor).

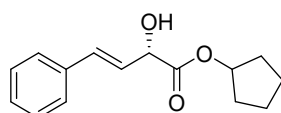

**3v**

**3v:** Prepared according to the general procedure IV above and obtained as yellow solid (119 mg, 97% yield, 97% ee, M.P. = 91 °C), eluent: petroleum ether/ethyl acetate (10:1 to 8:1);  $[\alpha]_D^{30} = +27.7$  ( $c = 0.35$ ,  $\text{CH}_2\text{Cl}_2$ ).  $^1\text{H NMR}$  (500 MHz,  $\text{CDCl}_3$ )  $\delta$  7.37 (d,  $J = 7.7$  Hz, 2H), 7.34 – 7.28 (m, 2H), 7.27 – 7.22 (m, 1H), 6.80 (d,  $J = 15.9$  Hz, 1H), 6.22 (dd,  $J = 15.9, 5.4$  Hz, 1H), 5.33 – 5.23 (m, 1H), 4.83 – 4.73 (m, 1H), 3.25 (d,  $J = 5.8$  Hz, 1H), 1.94 – 1.82 (m, 2H), 1.80 – 1.67 (m, 4H), 1.65 – 1.55 (m, 2H) ppm.  $^{13}\text{C NMR}$  (126 MHz,  $\text{CDCl}_3$ )  $\delta$  171.2, 134.4, 130.0, 126.7, 126.0, 124.7, 123.8, 77.4, 69.4, 30.8, 30.7, 21.7, 21.7. IR (KBr,  $\text{cm}^{-1}$ ): 3451, 2972, 1731, 1494, 1449, 1353, 1320, 1291, 1239, 1196, 1167, 1093, 1076, 1063, 965, 780, 747, 695, 573 ppm. HRMS (ESI) calcd for  $\text{C}_{15}\text{H}_{18}\text{O}_3\text{Na}^+$  ( $\text{M}+\text{Na}$ ) $^+$  269.1154, found 269.1146. HPLC analysis: Daicel Chiralpak AD-H, n-hexane/2-propanol = 80/20,  $v = 1.0$   $\text{mL}\cdot\text{min}^{-1}$ ,  $\lambda = 254$  nm, retention time: 18.5 min (major) and 15.0 min (minor).

## E) Synthesis of 2-hydroxy-3-enoic acid esters **5**

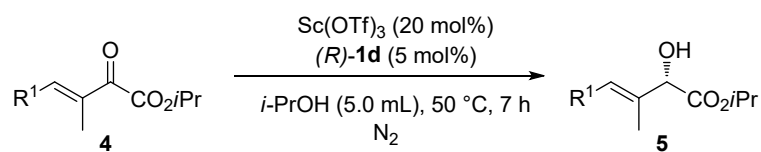

**General procedure V:** To a 25 mL flask,  $\beta,\gamma$ -unsaturated  $\alpha$ -keto ester **4** (0.5 mmol), Sc(OTf)<sub>3</sub> (0.1 mmol, 49.2 mg), (*R*)-**1d** (0.025 mmol, 14.5 mg) were dissolved in solvent *i*-PrOH (5 mL) under nitrogen atmosphere at 50 °C. The reaction mixture was stirred for 7 h. Then, the reaction solution was filtrated, and the corresponding solution was concentrated under reduced pressure. Purification of mixture by column chromatography on silica gel (PE/EA = 20:1 to 10:1, v/v) gave the desired products **5**.

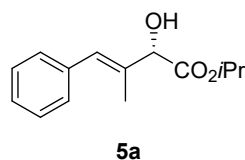

**5a:** Prepared according to the general procedure V above and obtained as yellow oil (111 mg, yield 95%, ee 84%), eluent: petroleum ether/ethyl acetate (10:1 to 8:1),  $[\alpha]_D^{30} = +25.6$  ( $c = 0.32$ , CH<sub>2</sub>Cl<sub>2</sub>). <sup>1</sup>H NMR (500 MHz, CDCl<sub>3</sub>)  $\delta$  7.27 (t,  $J = 7.5$  Hz, 2H), 7.21 (d,  $J = 7.4$  Hz, 2H), 7.17 (d,  $J = 8.1$  Hz, 1H), 6.57 (s, 1H), 5.11 – 5.02 (m, 1H), 4.56 (d,  $J = 5.0$  Hz, 1H), 3.28 (d,  $J = 5.2$  Hz, 1H), 1.78 (s, 3H), 1.23 (d,  $J = 6.3$  Hz, 3H), 1.19 (d,  $J = 6.2$  Hz, 3H) ppm. <sup>13</sup>C NMR (126 MHz, CDCl<sub>3</sub>)  $\delta$  173.3, 137.1, 134.7, 129.6, 129.0, 128.2, 126.9, 70.1, 21.7, 21.6, 13.5 ppm. IR (KBr, cm<sup>-1</sup>): 3501, 2981, 2932, 1727, 1492, 1450, 1375, 1259, 1208, 1176, 1104, 1076, 1015, 906, 820, 748, 699. HRMS (ESI) calcd for C<sub>14</sub>H<sub>18</sub>O<sub>3</sub>Na<sup>+</sup> (M+Na)<sup>+</sup> 257.1154, found 257.1156. Daicel Chiralpak AD-H, n-hexane/2-propanol = 80/20,  $v = 1.0$  mL·min<sup>-1</sup>,  $\lambda = 254$  nm, retention time: 9.1 min (major) and 8.0 min (minor).

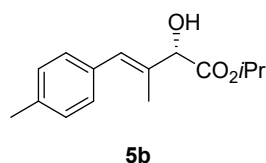

**5b:** Prepared according to the general procedure V above and obtained as yellow oil (110 mg, 89% yield, 86% ee), eluent: petroleum ether/ethyl acetate (10:1 to 8:1),  $[\alpha]_D^{30} = +30.0$  ( $c = 0.20$ , CH<sub>2</sub>Cl<sub>2</sub>). <sup>1</sup>H NMR (500 MHz, CDCl<sub>3</sub>)  $\delta$  7.26 – 7.18 (m, 4H), 6.64 (s,

1H), 5.22 – 5.13 (m, 1H), 4.66 (d,  $J = 5.0$  Hz, 1H), 3.39 (d,  $J = 5.2$  Hz, 1H), 2.40 (s, 3H), 1.89 (s, 3H), 1.35 (d,  $J = 6.3$  Hz, 3H), 1.30 (d,  $J = 6.2$  Hz, 3H) ppm.  $^{13}\text{C}$  NMR (126 MHz,  $\text{CDCl}_3$ )  $\delta$  173.4, 136.6, 134.2, 133.9, 129.6, 128.9, 128.9, 100.0, 70.0, 21.7, 21.6, 21.2, 13.5 ppm. IR (KBr,  $\text{cm}^{-1}$ ): 3373, 2974, 2899, 1729, 1452, 1380, 1268, 1085, 1049, 880, 639. HRMS (ESI) calcd for  $\text{C}_{15}\text{H}_{20}\text{O}_3\text{Na}^+$  ( $\text{M}+\text{Na}$ ) $^+$  271.1310, found 271.1310. Daicel Chiralpak AD-H, n-hexane/2-propanol = 80/20,  $v = 1.0$   $\text{mL}\cdot\text{min}^{-1}$ ,  $\lambda = 254$  nm, retention time: 10.2 min (major) and 9.2 min (minor).

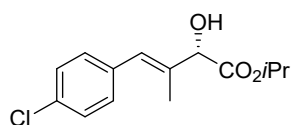

**5c:** Prepared according to the general procedure V above and obtained as yellow oil (119.5 mg, 89% yield, 82% ee), eluent: petroleum ether/ethyl acetate (10:1 to 8:1),  $[\alpha]_{\text{D}}^{30} = +30.9$  ( $c = 0.27$ , in  $\text{CH}_2\text{Cl}_2$ ).  $^1\text{H}$  NMR (500 MHz,  $\text{CDCl}_3$ )  $\delta$  7.34 (d,  $J = 8.4$  Hz, 2H), 7.24 (d,  $J = 8.4$  Hz, 2H), 6.62 (s, 1H), 5.24 – 5.08 (m, 1H), 4.65 (d,  $J = 4.2$  Hz, 1H), 3.45 (d,  $J = 4.9$  Hz, 1H), 1.86 (s, 3H), 1.34 (d,  $J = 6.3$  Hz, 3H), 1.29 (d,  $J = 6.2$  Hz, 3H) ppm.  $^{13}\text{C}$  NMR (126 MHz,  $\text{CDCl}_3$ )  $\delta$  173.1, 135.5, 135.4, 132.6, 130.3, 128.3, 128.3, 76.5, 70.2, 21.7, 21.6, 13.6 ppm. IR (KBr,  $\text{cm}^{-1}$ ): 3499, 2980, 2927, 2359, 1727, 1490, 1466, 1375, 1259, 1103, 1012, 906, 821, 727, 571. HRMS (ESI) calcd for  $\text{C}_{14}\text{H}_{17}\text{ClO}_3\text{Na}^+$  ( $\text{M}+\text{Na}$ ) $^+$  291.0764, found 291.0760. Daicel Chiralpak AD-H, n-hexane/2-propanol = 80/20,  $v = 1.0$   $\text{mL}\cdot\text{min}^{-1}$ ,  $\lambda = 254$  nm, retention time: 11.0 min (major) and 9.2 min (minor).

## F) Synthesis of 2-hydroxy-3-enoic acid esters **7**

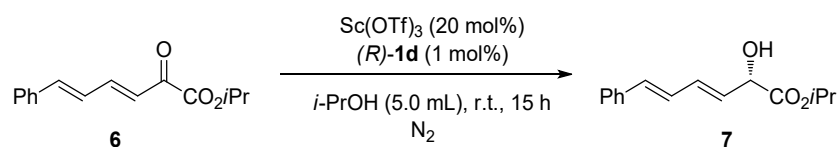

**Reaction procedure I:** To a 25 mL flask,  $\beta,\gamma$ -unsaturated  $\alpha$ -keto ester **6** (0.5 mmol),  $\text{Sc}(\text{OTf})_3$  (0.1 mmol, 49.2 mg),  $(R)\text{-1d}$  (0.005 mmol, 2.9 mg) were dissolved in solvent  $i\text{-PrOH}$  (5 mL) under nitrogen atmosphere at room temperature. The reaction mixture was stirred for 15 h. Then, the reaction solution was filtrated, and the corresponding solution was concentrated under reduced pressure. Purification of mixture by column chromatography on silica gel (PE/EA = 20:1 to 10:1, v/v) gave the desired products **7**.

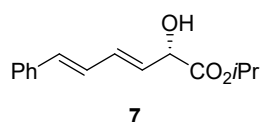

**7:** Prepared according to the reaction procedure I above and obtained as yellow oil (92 mg, 75% yield, 92% ee, M.P. = 53 °C), eluent: petroleum ether/ethyl acetate (10:1 to 8:1),  $[\alpha]_D^{30} = +11.2$  ( $c = 0.27$ ,  $\text{CH}_2\text{Cl}_2$ ).  $^1\text{H}$  NMR (500 MHz,  $\text{CDCl}_3$ )  $\delta$  7.40 (d,  $J = 7.6$  Hz, 2H), 7.31 (t,  $J = 7.6$  Hz, 2H), 7.23 (t,  $J = 7.3$  Hz, 1H), 6.78 (dd,  $J = 15.5, 10.7$  Hz, 1H), 6.60 (dd,  $J = 15.3, 6.9$  Hz, 2H), 5.84 (dd,  $J = 15.3, 5.5$  Hz, 1H), 5.16 – 5.07 (m, 1H), 4.71 (t,  $J = 4.8$  Hz, 1H), 3.07 (d,  $J = 5.6$  Hz, 1H), 1.31 (d,  $J = 6.3$  Hz, 3H), 1.28 (d,  $J = 6.2$  Hz, 3H) ppm.  $^{13}\text{C}$  NMR (126 MHz,  $\text{CDCl}_3$ )  $\delta$  172.8, 137.0, 133.7, 132.3, 129.3, 128.6, 127.8, 127.6, 126.5, 71.1, 70.2, 21.8, 21.7 ppm. IR (KBr,  $\text{cm}^{-1}$ ): 3360, 2977, 2922, 2852, 1730, 1659, 1451, 1376, 1263, 1214, 1103, 1050, 991, 745, 692. HRMS (ESI) calcd for  $\text{C}_{15}\text{H}_{18}\text{O}_3\text{Na}^+$  ( $\text{M}+\text{Na}$ ) $^+$  269.1154, found 269.1153. Daicel Chiralpak AD-H, n-hexane/2-propanol = 80/20,  $v = 1.0 \text{ mL} \cdot \text{min}^{-1}$ ,  $\lambda = 254 \text{ nm}$ , retention time: 16.0 min (major) and 15.1 min (minor).

### G) Gram-scale reaction

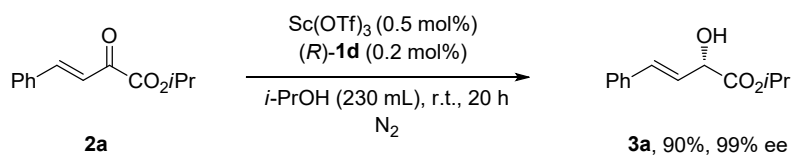

To a 250 mL flask,  $\beta,\gamma$ -unsaturated  $\alpha$ -keto ester **2a** (22.9 mmol, 5.0 g),  $\text{Sc}(\text{OTf})_3$  (11.5 mmol, 5.66 mg),  $(R)\text{-1d}$  (4.6 mmol, 2.67 mg) were dissolved in solvent  $i\text{-PrOH}$  (230 ml) under nitrogen atmosphere. The reaction mixture was stirred for 20 h. Then, the reaction solution was filtrated, and the corresponding solution was concentrated under reduced pressure. Purification of mixture by column chromatography on silica gel (PE/EA = 20:1 to 10:1, v/v) gave the desired products **3a** (4.53 g, 90% yield, 99% ee).

## H) Transformation of chiral allyl alcohol **3a**

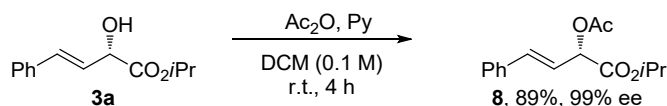

**Reaction procedure II:** Ac<sub>2</sub>O (102 mg, 1 mmol) was added to a solution of **3a** (110 mg, 0.5 mmol) and pyridine (80 μL, 1 mmol) in DCM (5 mL). And the resulting mixture was stirred at room temperature for 4 hours. After the reaction completed, water (5 mL) was added and the resulting residue was extracted by DCM (100 mL x 2). The combined organic layer was dried over anhydrous Na<sub>2</sub>SO<sub>4</sub>. After the solvent was removed under reduced pressure, the crude product was purified by flash column chromatography on silica gel and eluted with petroleum ether/ethyl acetate (20/1-10/1) to afford **8** (117 mg, 89% yield, 99% ee).

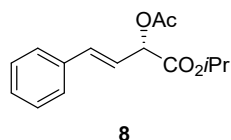

**8:** Prepared according to the reaction procedure II above and obtained as colorless oil (117 mg, 89% yield, 99% ee), eluent: petroleum ether/ethyl acetate (20:1 to 10:1),  $[\alpha]_D^{30} = +41.2$  ( $c = 0.26$ , CH<sub>2</sub>Cl<sub>2</sub>). <sup>1</sup>H NMR (500 MHz, CDCl<sub>3</sub>) δ 7.41 (d,  $J = 7.3$  Hz, 2H), 7.35 (d,  $J = 7.3$  Hz, 2H), 7.30 – 7.26 (m, 1H), 6.81 (d,  $J = 15.9$  Hz, 1H), 6.31 – 6.17 (m, 1H), 5.56 (d,  $J = 6.0$  Hz, 1H), 5.20 – 4.99 (m, 1H), 2.20 (d,  $J = 2.5$  Hz, 3H), 1.30 (dd,  $J = 6.2, 2.3$  Hz, 3H), 1.25 (dd,  $J = 6.3, 2.3$  Hz, 3H) ppm. <sup>13</sup>C NMR (126 MHz, CDCl<sub>3</sub>) δ 168.9, 167.0, 134.5, 133.8, 127.4, 127.3, 125.6, 119.8, 72.2, 68.4, 20.5, 20.4, 19.5 ppm. IR (KBr, cm<sup>-1</sup>): 3444, 2981, 2930, 1744, 1451, 1373, 1258, 1226, 1104, 1045, 967, 738, 692.

HRMS (ESI) calcd for C<sub>15</sub>H<sub>18</sub>O<sub>4</sub>Na<sup>+</sup> (M+Na)<sup>+</sup> 285.1103, found 285.1103. Daicel Chiralpak AD-H, n-hexane/2-propanol = 98/2,  $v = 1.0$  mL·min<sup>-1</sup>,  $\lambda = 254$  nm, retention time: 5.6 min (major) and 5.2 min (minor).

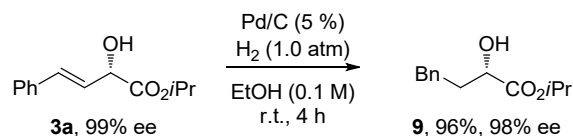

**Reaction procedure III:** Take starting material **3a** (110 mg, 0.5 mmol), Pd/C (3 mg, 0.025 mmol) and ethanol (5 mL) in a round bottom flask, fit with a balloon fill with H<sub>2</sub>. The reaction mixture was stirred at room temperature for 4 h. Then, the reaction solution was filtrated, and the corresponding solution was concentrated under reduced pressure. Purification of mixture by column chromatography on silica gel (PE/EA = 10:1, v/v) gave the desired products **9** (107 mg, 96% yield, 98% ee).

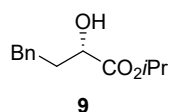

**9:** Prepared according to the reaction procedure III above and obtained as white solid (107 mg, 96% yield, 98% ee), eluent: petroleum ether/ethyl acetate (10:1 to 8:1);  $[\alpha]_{\text{D}}^{30} = +9.0$  ( $c = 0.29$ , CH<sub>2</sub>Cl<sub>2</sub>). <sup>1</sup>H NMR (500 MHz, CDCl<sub>3</sub>)  $\delta$  7.33 (t,  $J = 7.5$  Hz, 2H), 7.24 (d,  $J = 4.7$  Hz, 3H), 5.18 – 5.08 (m, 1H), 4.19 (dd,  $J = 7.8, 4.0$  Hz, 1H), 3.05 (s, 1H), 2.87 – 2.72 (m, 2H), 2.19 – 2.09 (m, 1H), 2.01 – 1.92 (m, 1H), 1.31 (dd,  $J = 6.4, 4.1$  Hz, 6H) ppm. <sup>13</sup>C NMR (126 MHz, CDCl<sub>3</sub>)  $\delta$  174.8, 141.3, 128.6, 128.4, 126.0, 69.8, 69.6, 36.2, 31.1, 21.8, 21.8 ppm. IR (KBr, cm<sup>-1</sup>): 3444, 2979, 2925, 1727, 1495, 1454, 1376, 1252, 1179, 1103, 904, 746, 700. HRMS (ESI) calcd for C<sub>13</sub>H<sub>18</sub>O<sub>3</sub>Na<sup>+</sup> (M+Na)<sup>+</sup> 245.1154, found 245.1156. Daicel Chiralpak AD-H, n-hexane/2-propanol = 90/10,  $v = 1.0$  mL·min<sup>-1</sup>,  $\lambda = 254$  nm, retention time: 8.5 min (major) and 7.1 min (minor).



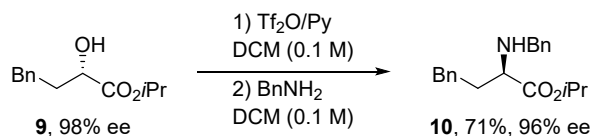

**Reaction procedure IV:** To a solution of **9** (111 mg, 0.5 mmol) and pyridine (60  $\mu\text{L}$ , 0.75 mmol) in  $\text{CH}_2\text{Cl}_2$  (5 mL) was added dropwise trifluoromethanesulfonic anhydride (126  $\mu\text{L}$ , 0.75 mmol) slowly in an ice bath. The mixture was stirred for 0.5 h in an ice bath and concentrated in vacuo. Purification of mixture by column chromatography on silica gel (PE/EA = 30:1, v/v) gave the desired products.

To a suspension of products in  $\text{CH}_2\text{Cl}_2$  (5 mL) were added  $\text{Et}_3\text{N}$  (69  $\mu\text{L}$ , 0.5 mmol) and then a solution of benzylamine (60  $\mu\text{L}$ , 0.55 mmol) in  $\text{CH}_2\text{Cl}_2$  (5 mL). After being stirred at room temperature for 5 h, the reaction mixture was concentrated in vacuo. The residue was dissolved in EtOAc, washed with  $\text{H}_2\text{O}$ , dried over  $\text{MgSO}_4$ , and concentrated in vacuo. Purification of mixture by column chromatography on silica gel (PE/EA = 20:1, v/v) gave the desired products **10** (110 mg, 71% yield, 96% ee).

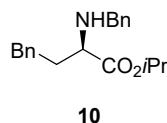

**10:** Prepared according to the reaction procedure IV above and obtained as colorless oil (110 mg, 71% yield, 96% ee), eluent: petroleum ether/ethyl acetate (20:1 to 10:1),  $[\alpha]_{\text{D}}^{30} = +25.0$  ( $c = 0.32$ ,  $\text{CH}_2\text{Cl}_2$ ).  $^1\text{H NMR}$  (500 MHz,  $\text{DMSO-}d_6$ )  $\delta$  7.34 – 7.29 (m, 4H), 7.25 (t,  $J = 7.6$  Hz, 3H), 7.16 (dd,  $J = 10.4$ , 7.5 Hz, 3H), 5.20 – 4.75 (m, 1H), 3.77 (d,  $J = 13.4$  Hz, 1H), 3.55 (d,  $J = 13.4$  Hz, 1H), 3.09 (t,  $J = 6.8$  Hz, 1H), 2.75 – 2.56 (m, 2H), 2.45 (s, 1H), 1.90 – 1.74 (m, 2H), 1.21 (dd,  $J = 6.4$ , 4.3 Hz, 6H) ppm.  $^{13}\text{C NMR}$  (126 MHz,  $\text{DMSO-}d_6$ )  $\delta$  174.0, 141.5, 140.3, 128.3, 128.2, 128.1, 128.0, 126.6, 125.7, 67.4, 59.4, 50.9, 34.6, 31.4, 21.7, 21.5 ppm. IR (KBr,  $\text{cm}^{-1}$ ): 3443, 2926, 2854, 1727, 1494, 1454, 1374, 1247, 1182, 1106, 1028, 735, 698. HRMS (ESI) calcd for  $\text{C}_{20}\text{H}_{26}\text{NO}_2^+$  ( $\text{M}+\text{H}$ ) $^+$  312.1964, found 312.1962. Daicel Chiralpak AD-H, n-hexane/2-propanol = 90/10,  $v = 1.0$   $\text{mL}\cdot\text{min}^{-1}$ ,  $\lambda = 254$  nm, retention time: 5.5 min (major) and 4.9 min (minor).

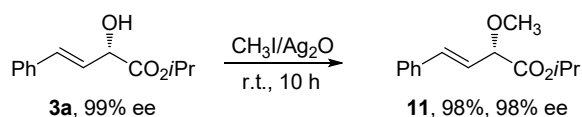

**Reaction procedure V:** Take starting material **3a** (110 mg, 0.5 mmol), Ag<sub>2</sub>O (0.95 g, 3.5 mmol) and CH<sub>3</sub>I (5 mL) in a round bottom flask. The reaction mixture was stirred until the reaction completed. Then, the reaction solution was filtrated, and the corresponding solution was concentrated under reduced pressure. Purification of mixture by column chromatography on silica gel (PE/EA = 10:1, v/v) gave the desired products **11** (114 mg, 98% yield, 98% ee).

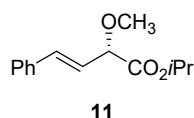

**11:** Prepared according to the reaction procedure V above and obtained as yellow oil (114 mg, 98% yield, 98% ee), eluent: petroleum ether/ethyl acetate (20:1 to 10:1),  $[\alpha]_{\text{D}}^{30} = +11.5$  ( $c = 0.26$ , in CH<sub>2</sub>Cl<sub>2</sub>). <sup>1</sup>H NMR (500 MHz, CDCl<sub>3</sub>)  $\delta$  7.46 – 7.42 (m, 2H), 7.37 (t,  $J = 7.5$  Hz, 2H), 7.33 – 7.30 (m, 1H), 6.81 (d,  $J = 16.0$  Hz, 1H), 6.24 (dd,  $J = 15.9$ , 6.7 Hz, 1H), 5.23 – 5.10 (m, 1H), 4.42 (dd,  $J = 6.8$ , 1.4 Hz, 1H), 3.49 (s, 3H), 1.34 (d,  $J = 6.3$  Hz, 3H), 1.31 (d,  $J = 6.2$  Hz, 3H) ppm. <sup>13</sup>C NMR (126 MHz, CDCl<sub>3</sub>)  $\delta$  170.1, 136.1, 134.1, 128.6, 128.2, 126.7, 123.9, 81.4, 69.0, 57.3, 21.8, 21.7 ppm. IR (KBr, cm<sup>-1</sup>): 3443, 2981, 2931, 1744, 1452, 1375, 1261, 1193, 1104, 1048, 968, 738, 693. HRMS (ESI) calcd for C<sub>14</sub>H<sub>18</sub>O<sub>3</sub>Na<sup>+</sup> (M+Na)<sup>+</sup> 257.1154, found 257.1162. Daicel Chiralpak AD-H, n-hexane/2-propanol = 95/5,  $v = 1.0$  mL·min<sup>-1</sup>,  $\lambda = 254$  nm, retention time: 8.0 min (major) and 7.6 min (minor).

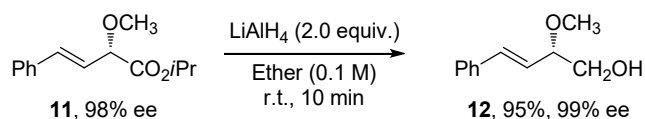

**Reaction procedure VI:** Take starting material **11** (117 mg, 0.5 mmol), LiAlH<sub>4</sub> (38 mg, 1 mmol) and ether (5 mL) in a round bottom flask. The reaction mixture was stirred until the reaction completed. Then, the reaction solution was filtrated, and the corresponding solution was concentrated under reduced pressure. Purification of mixture by column chromatography on silica gel (PE/EA = 5:1, v/v) gave the desired products **12** (85 mg, 95% yield, 99% ee).

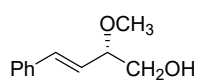

**12**

**12:** Prepared according to the reaction procedure VI above and obtained as colorless oil (85 mg, yield 95%, ee 99%), eluent: petroleum ether/ethyl acetate (5:1 to 3:1),  $[\alpha]_{\text{D}}^{30} = +20.6$  ( $c = 0.31$ , CH<sub>2</sub>Cl<sub>2</sub>). <sup>1</sup>H NMR (500 MHz, CDCl<sub>3</sub>)  $\delta$  7.45 (d,  $J = 7.5$  Hz, 2H), 7.38 (t,  $J = 7.5$  Hz, 2H), 7.34 – 7.29 (m, 1H), 6.70 (d,  $J = 16.0$  Hz, 1H), 6.09 (dd,  $J = 16.0$ , 7.7 Hz, 1H), 3.98 – 3.89 (m, 1H), 3.75 – 3.62 (m, 2H), 3.44 (s, 3H), 2.27 (s, 1H) ppm. <sup>13</sup>C NMR (126 MHz, CDCl<sub>3</sub>)  $\delta$  135.7, 133.8, 128.2, 127.6, 126.1, 125.4, 82.5, 65.0, 56.1 ppm. IR (KBr, cm<sup>-1</sup>): 3360, 2922, 2852, 1730, 1659, 1632, 1452, 1384, 1260, 1063, 969, 748, 693. HRMS (ESI) calcd for C<sub>11</sub>H<sub>14</sub>O<sub>2</sub>Na<sup>+</sup> (M+Na)<sup>+</sup> 201.0891, found 201.0900. Daicel Chiralpak AD-H, n-hexane/2-propanol = 95/5,  $v = 1.0$  mL·min<sup>-1</sup>,  $\lambda = 254$  nm, retention time: 14.7 min (major) and 14.0 min (minor).

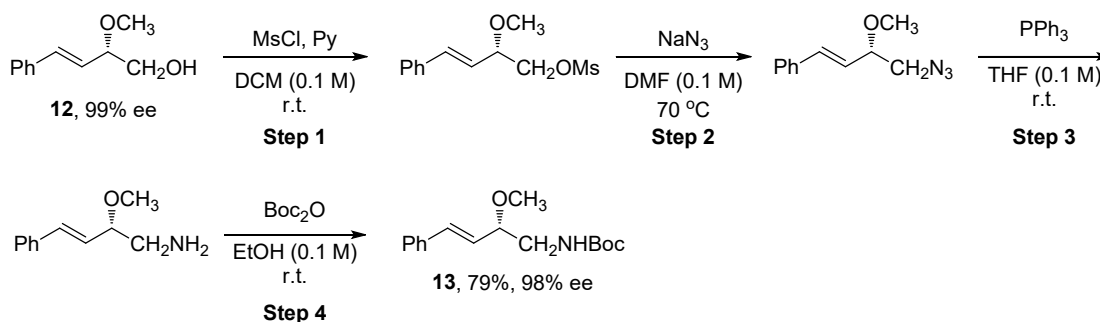

**Reaction procedure VII:** Step 1) Methanesulfonyl chloride (46  $\mu\text{L}$ , 0.6 mmol) was added successively to a solution of **12** (89 mg, 0.5 mmol) and pyridine (80  $\mu\text{L}$ , 1 mmol) in DCM (5 mL) at 0  $^\circ\text{C}$ . The mixture was then heated to room temperature and stirred for 5 hours at this temperature. After the reaction completed, it was poured into ice water. The organic layer was washed successively by 1 M HCl solution (10 mL x 2) and saturated aqueous sodium bicarbonate solution (10 mL x 2). The organic layer was dried over anhydrous  $\text{Na}_2\text{SO}_4$ . After the solvent was removed under reduced pressure, the crude product was obtained, which could be used directly in the next step without further purification. Step 2) Sodium azide (65 mg, 1 mmol) was added to a solution of the crude from the previous step in DMF (5 mL) under nitrogen atmosphere. The resulting mixture was stirred at 70  $^\circ\text{C}$  for 12 hours. Then the reaction was allowed to cool to room temperature and diluted with water (20 mL). The aqueous layer was extracted by EtOAc (20 mL x 3) and the combined organic layers were dried over  $\text{Na}_2\text{SO}_4$ . After the solvent was removed under reduced pressure, the crude product was purified by flash column chromatography on silica gel and eluted with petroleum ether/ethyl acetate (50/1-20/1) to afford (4-azido-3-methoxybut-1-en-1-yl)benzene (75 mg, 74% yield). Step 3)  $\text{PPh}_3$  (97 mg, 0.74 mmol) was added to a solution of (4-azido-3-methoxybut-1-en-1-yl)benzene (75 mg, 0.37 mmol) in THF (4 mL) under nitrogen atmosphere and the resulting mixture was stirred at room temperature for 4 hours. Then water (4 mL) was added and the mixture was allowed to stir for 8 hours. After the reaction completed, the mixture was concentrated and the residue was extracted by DCM (5 mL x 3). The combined organic layer was dried over anhydrous  $\text{Na}_2\text{SO}_4$  and the solvent was removed under reduced pressure. The residue was purified by flash column chromatography on silica gel and eluted with dichloromethane/methanol (5/1)

to afford 2-methoxy-4-phenylbut-3-en-1-amine (58 mg, 89% yield). Step 4) Boc<sub>2</sub>O (131 mg, 0.6 mmol) was added to a solution of 2-methoxy-4-phenylbut-3-en-1-amine (58 mg, 0.3 mmol) and Et<sub>3</sub>N (83 μL, 0.6 mmol) in DCM (3 mL). And the resulting mixture was stirred at room temperature for 3 h. After the reaction completed, water (5 mL) was added and the resulting residue was extracted by DCM (50 mL x 2). The combined organic layer was dried over anhydrous Na<sub>2</sub>SO<sub>4</sub>. After the solvent was removed under reduced pressure, the crude product was purified by flash column chromatography on silica gel and eluted with petroleum ether/ethyl acetate (20/1-10/1) to afford (2-methoxy-4-phenylbut-3-en-1-yl)carbamate **13** (66 mg, 79% yield, 98% ee).

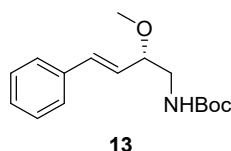

**13**: Prepared according to the reaction procedure VII above and obtained as colorless oil (66 mg, 79% yield, 98% ee), eluent: petroleum ether/ethyl acetate (20:1 to 10:1),  $[\alpha]_D^{30} = +3.1$  ( $c = 0.26$ , CH<sub>2</sub>Cl<sub>2</sub>). <sup>1</sup>H NMR (500 MHz, DMSO-*d*<sub>6</sub>)  $\delta$  7.45 (d,  $J = 7.5$  Hz, 2H), 7.33 (t,  $J = 7.5$  Hz, 2H), 7.25 (t,  $J = 7.3$  Hz, 1H), 6.84 (t,  $J = 5.7$  Hz, 1H), 6.58 (d,  $J = 16.0$  Hz, 1H), 6.08 (dd,  $J = 16.0, 7.7$  Hz, 1H), 3.78 (q,  $J = 6.5$  Hz, 1H), 3.22 (s, 3H), 3.08 (t,  $J = 5.9$  Hz, 2H), 1.33 (s, 9H) ppm. <sup>13</sup>C NMR (126 MHz, DMSO-*d*<sub>6</sub>)  $\delta$  156.1, 136.8, 133.0, 129.0, 128.7, 128.2, 126.9, 81.1, 78.1, 56.3, 44.5, 28.7 ppm. IR (KBr, cm<sup>-1</sup>): 3355, 2922, 2851, 2388, 1715, 1504, 1464, 1365, 1250, 1166, 1105, 968, 749, 693, 511. HRMS (ESI) calcd for C<sub>16</sub>H<sub>23</sub>NO<sub>3</sub>Na<sup>+</sup> (M+Na)<sup>+</sup> 284.1263, found 284.1259. Daicel Chiralpak AD-H, n-hexane/2-propanol = 98/2,  $v = 1.0$  mL·min<sup>-1</sup>,  $\lambda = 254$  nm, retention time: 22.0 min (major) and 20.8 min (minor).

## I) Synthesis of 2-hydroxy-3-ynoic acid esters **15**

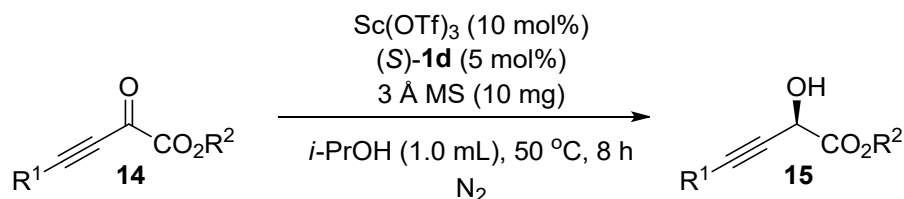

**General procedure VI:** To a 25 mL flask, 2-oxo-3-ynoates **14** (0.1 mmol), Sc(OTf)<sub>3</sub> (0.01 mmol, 4.92 mg), (S)-**1d** (0.005 mmol, 2.90 mg) and 3 Å MS (10 mg) were dissolved in solvent *i*-PrOH (1 mL) under nitrogen atmosphere at 50 °C. The reaction mixture was stirred for 8 h. Then, the reaction solution was filtrated, and the corresponding solution was concentrated under reduced pressure. Purification of mixture by column chromatography on silica gel (PE/EA = 30:1 to 10:1, v/v) gave the desired products **15**.

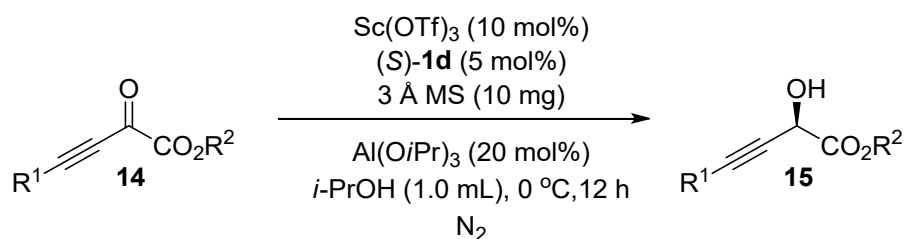

**General procedure VII:** To a 25 mL flask, 2-oxo-3-ynoates **14** (0.1 mmol), Sc(OTf)<sub>3</sub> (0.01 mmol, 4.92 mg), (S)-**1d** (0.005 mmol, 2.90 mg), Al(O*i*Pr)<sub>3</sub> (0.02 mmol, 4.08 mg), and 3 Å MS (10 mg) were dissolved in solvent *i*-PrOH (1 mL) under nitrogen atmosphere at 0 °C. The reaction mixture was stirred for 12 h. Then, the reaction solution was filtrated, and the corresponding solution was concentrated under reduced pressure. Purification of mixture by column chromatography on silica gel (PE/EA = 30:1 to 10:1, v/v) gave the desired products **15**.

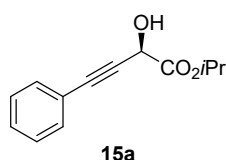

**15a:** Prepared according to the general procedure VI above and obtained as yellow oil (20.5 mg, 94% yield, 92% ee), eluent: petroleum ether/ethyl acetate (30:1 to 10:1),  $[\alpha]_D^{30} = -18.8$  ( $c = 0.33$ , CH<sub>2</sub>Cl<sub>2</sub>). <sup>1</sup>H NMR (500 MHz, CDCl<sub>3</sub>)  $\delta$  7.44 (d,  $J = 6.0$  Hz, 2H), 7.33 (t,  $J = 7.9$  Hz, 3H), 5.24 – 5.14 (m, 1H), 5.13 (s, 1H), 5.01 (d,  $J = 7.3$  Hz,

1H), 3.20 (d,  $J = 7.4$  Hz, 1H), 1.34 (s, 3H), 1.33 (s, 3H) ppm.  $^{13}\text{C}$  NMR (126 MHz,  $\text{CDCl}_3$ )  $\delta$  169.9, 131.9, 128.7, 128.3, 121.9, 85.2, 84.4, 71.0, 62.1, 21.7, 21.5 ppm. IR (KBr,  $\text{cm}^{-1}$ ): 3458, 2982, 2931, 2226, 1740, 1599, 1491, 1376, 1270, 1146, 1103, 990, 758, 691, 528. HRMS (ESI) calcd for  $\text{C}_{13}\text{H}_{14}\text{O}_3\text{Na}^+$  ( $\text{M}+\text{Na}$ ) $^+$  241.0841, found 241.0843. Daicel Chiralpak AD-H, n-hexane/2-propanol = 90/10,  $v = 1.0$  mL $\cdot$ min $^{-1}$ ,  $\lambda = 254$  nm, retention time: 9.3 min (major) and 8.2 min (minor).

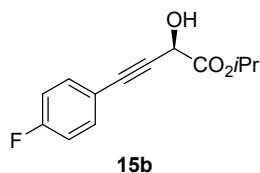

**15b:** Prepared according to the general procedure VI above and obtained as yellow oil (21.7 mg, 92% yield, 90% ee), eluent: petroleum ether/ethyl acetate (30:1 to 10:1),  $[\alpha]_{\text{D}}^{30} = -62.2$  ( $c = 0.27$ ,  $\text{CH}_2\text{Cl}_2$ ).  $^1\text{H}$  NMR (500 MHz,  $\text{CDCl}_3$ )  $\delta$  7.41 (dd,  $J = 8.3, 5.6$  Hz, 2H), 6.99 (t,  $J = 8.6$  Hz, 2H), 5.22 – 5.11 (m, 1H), 5.00 (d,  $J = 7.0$  Hz, 1H), 3.35 (d,  $J = 7.2$  Hz, 1H), 1.33 (s, 3H), 1.31 (s, 3H) ppm.  $^{13}\text{C}$  NMR (126 MHz,  $\text{CDCl}_3$ )  $\delta$  169.9, 162.8 (d,  $^1J_{\text{C-F}} = 250.7$  Hz), 133.8 (d,  $^3J_{\text{C-F}} = 8.3$  Hz), 118.0 (d,  $^4J_{\text{C-F}} = 3.7$  Hz), 115.6 (d,  $^2J_{\text{C-F}} = 22.3$  Hz), 84.2, 84.1, 71.0, 62.0, 21.6, 21.5 ppm. IR (KBr,  $\text{cm}^{-1}$ ): 3471, 2984, 2937, 2229, 1741, 1601, 1507, 1468, 1377, 1271, 1231, 1104, 838, 798, 531. HRMS (ESI) calcd for  $\text{C}_{13}\text{H}_{13}\text{FO}_3\text{Na}^+$  ( $\text{M}+\text{Na}$ ) $^+$  259.0746, found 259.0759. Daicel Chiralpak AD-H, n-hexane/2-propanol = 90/10,  $v = 1.0$  mL $\cdot$ min $^{-1}$ ,  $\lambda = 254$  nm, retention time: 9.7 min (major) and 8.0 min (minor).

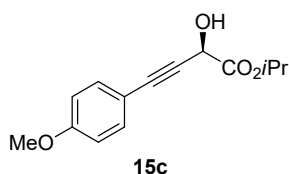

**15c:** Prepared according to the general procedure VII above and obtained as yellow oil (23.3 mg, 94% yield, 95% ee), eluent: petroleum ether/ethyl acetate (30:1 to 10:1),  $[\alpha]_{\text{D}}^{30} = -20.8$  ( $c = 0.34$ ,  $\text{CH}_2\text{Cl}_2$ ).  $^1\text{H}$  NMR (500 MHz,  $\text{CDCl}_3$ )  $\delta$  7.37 (d,  $J = 8.7$  Hz, 2H), 6.83 (d,  $J = 8.7$  Hz, 2H), 5.22 – 5.12 (m, 1H), 5.00 (d,  $J = 6.9$  Hz, 1H), 3.80 (s, 3H), 3.23 (d,  $J = 7.1$  Hz, 1H), 1.33 (s, 3H), 1.32 (s, 3H) ppm.  $^{13}\text{C}$  NMR (126 MHz,  $\text{CDCl}_3$ )  $\delta$  170.1, 160.0, 133.4, 114.0, 113.9, 85.3, 83.2, 70.8, 62.1, 55.3, 21.7, 21.5 ppm.

IR (KBr,  $\text{cm}^{-1}$ ): 3467, 2982, 2936, 2840, 2225, 1740, 1606, 1510, 1465, 1291, 1250, 1175, 1105, 1091, 834, 790, 537. HRMS (ESI) calcd for  $\text{C}_{14}\text{H}_{16}\text{O}_4\text{Na}^+$  ( $\text{M}+\text{Na}$ ) $^+$  271.0946, found 271.0957. Daicel Chiralpak AD-H, n-hexane/2-propanol = 90/10,  $v = 1.0 \text{ mL}\cdot\text{min}^{-1}$ ,  $\lambda = 254 \text{ nm}$ , retention time: 16.8 min (major) and 13.7 min (minor).

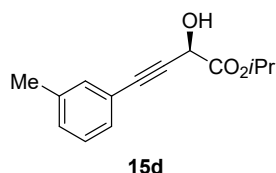

**15d**: Prepared according to the general procedure VII above and obtained as yellow oil (19.2 mg, 83% yield, 90% ee), eluent: petroleum ether/ethyl acetate (30:1 to 10:1),  $[\alpha]_{\text{D}}^{30} = -32.3$  ( $c = 1.43$ ,  $\text{CH}_2\text{Cl}_2$ ).  $^1\text{H}$  NMR (500 MHz,  $\text{CDCl}_3$ )  $\delta$  7.27 (d,  $J = 12.8 \text{ Hz}$ , 2H), 7.22 (t,  $J = 7.5 \text{ Hz}$ , 1H), 7.17 (d,  $J = 7.5 \text{ Hz}$ , 1H), 5.23 – 5.16 (m, 1H), 5.02 (d,  $J = 7.4 \text{ Hz}$ , 1H), 3.20 (d,  $J = 7.5 \text{ Hz}$ , 1H), 2.34 (s, 3H), 1.36 (s, 3H), 1.35 (s, 3H) ppm.  $^{13}\text{C}$  NMR (126 MHz,  $\text{CDCl}_3$ )  $\delta$  170.0, 138.0, 132.4, 129.7, 129.0, 128.2, 121.8, 85.4, 84.1, 70.9, 62.1, 21.7, 21.5, 21.2 ppm. IR (KBr,  $\text{cm}^{-1}$ ): 3457, 2983, 2933, 2231, 1740, 1602, 1485, 1275, 1208, 1103, 1022, 786, 691, 589, 442. HRMS (ESI) calcd for  $\text{C}_{14}\text{H}_{16}\text{O}_3\text{Na}^+$  ( $\text{M}+\text{Na}$ ) $^+$  255.0997, found 255.1001. Daicel Chiralpak AD-H, n-hexane/2-propanol = 90/10,  $v = 1.0 \text{ mL}\cdot\text{min}^{-1}$ ,  $\lambda = 254 \text{ nm}$ , retention time: 10.5 min (major) and 8.8 min (minor).

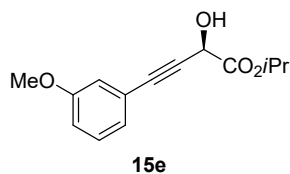

**15e**: Prepared according to the general procedure VII above and obtained as yellow oil (22.8 mg, 92% yield, 90% ee), eluent: petroleum ether/ethyl acetate (30:1 to 10:1),  $[\alpha]_{\text{D}}^{30} = -41.5$  ( $c = 0.93$ ,  $\text{CH}_2\text{Cl}_2$ ).  $^1\text{H}$  NMR (500 MHz,  $\text{CDCl}_3$ )  $\delta$  7.22 (t,  $J = 8.0 \text{ Hz}$ , 1H), 7.04 (d,  $J = 7.6 \text{ Hz}$ , 1H), 6.97 (s, 1H), 6.89 (dd,  $J = 8.3, 2.1 \text{ Hz}$ , 1H), 5.22 – 5.14 (m, 1H), 5.01 (s, 1H), 3.79 (s, 3H), 3.20 (s, 1H), 1.34 (s, 3H), 1.33 (s, 3H) ppm.  $^{13}\text{C}$  NMR (126 MHz,  $\text{CDCl}_3$ )  $\delta$  169.9, 159.3, 129.4, 124.4, 122.9, 116.7, 115.4, 85.1, 84.2, 71.0, 62.0, 55.3, 21.7, 21.5 ppm. IR (KBr,  $\text{cm}^{-1}$ ): 3457, 2982, 2937, 2232, 1740, 1601, 1483, 1287, 1205, 1103, 1045, 786, 687, 584. HRMS (ESI) calcd for  $\text{C}_{14}\text{H}_{16}\text{O}_4\text{Na}^+$



(M+Na)<sup>+</sup> 271.0946, found 271.0961. Daicel Chiralpak AD-H, n-hexane/2-propanol = 90/10,  $v = 1.0 \text{ mL} \cdot \text{min}^{-1}$ ,  $\lambda = 254 \text{ nm}$ , retention time: 10.6 min (major) and 9.8 min (minor).

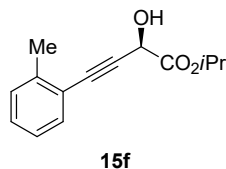

**15f**: Prepared according to the general procedure VI above and obtained as yellow oil (22.7 mg, 98% yield, 92% ee), eluent: petroleum ether/ethyl acetate (30:1 to 10:1),  $[\alpha]_D^{30} = -25.6$  ( $c = 0.50$ ,  $\text{CH}_2\text{Cl}_2$ ). <sup>1</sup>H NMR (500 MHz,  $\text{CDCl}_3$ )  $\delta$  7.39 (dd,  $J = 7.6, 1.5$  Hz, 1H), 7.33 – 7.27 (m, 1H), 6.91 – 6.83 (m, 2H), 5.23 – 5.13 (m, 1H), 5.06 (d,  $J = 7.6$  Hz, 1H), 3.85 (s, 3H), 3.19 (d,  $J = 7.6$  Hz, 1H), 1.34 (d,  $J = 2.8$  Hz, 3H), 1.33 (d,  $J = 2.8$  Hz, 3H) ppm. <sup>13</sup>C NMR (126 MHz,  $\text{CDCl}_3$ )  $\delta$  170.0, 160.4, 133.9, 130.3, 120.4, 111.3, 110.8, 88.4, 81.7, 70.7, 62.3, 55.7, 21.7, 21.4 ppm. IR (KBr,  $\text{cm}^{-1}$ ): 3472, 2982, 2937, 2839, 2230, 1740, 1596, 1493, 1464, 1263, 1146, 1106, 1023, 755, 595. HRMS (ESI) calcd for  $\text{C}_{14}\text{H}_{16}\text{O}_3\text{Na}^+$  (M+Na)<sup>+</sup> 255.0997, found 255.1004. Daicel Chiralpak AD-H, n-hexane/2-propanol = 90/10,  $v = 1.0 \text{ mL} \cdot \text{min}^{-1}$ ,  $\lambda = 254 \text{ nm}$ , retention time: 8.8 min (major) and 7.9 min (minor).

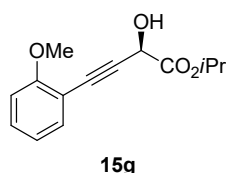

**15g**: Prepared according to the general procedure VI above and obtained as yellow oil (23.5 mg, 95% yield, 92% ee), eluent: petroleum ether/ethyl acetate (30:1 to 10:1),  $[\alpha]_D^{30} = -34.0$  ( $c = 0.43$ ,  $\text{CH}_2\text{Cl}_2$ ). <sup>1</sup>H NMR (500 MHz,  $\text{CDCl}_3$ )  $\delta$  7.39 (dd,  $J = 7.5, 1.4$  Hz, 1H), 7.32 – 7.27 (m, 1H), 6.91 – 6.84 (m, 2H), 5.21 – 5.14 (m, 1H), 5.06 (d,  $J = 7.4$  Hz, 1H), 3.85 (s, 3H), 3.26 (d,  $J = 7.6$  Hz, 1H), 1.34 (d,  $J = 2.8$  Hz, 3H), 1.32 (d,  $J = 2.8$  Hz, 3H) ppm. <sup>13</sup>C NMR (126 MHz,  $\text{CDCl}_3$ )  $\delta$  170.0, 160.37, 133.8, 130.3, 120.4, 111.2, 110.7, 88.5, 81.7, 70.7, 62.3, 55.7, 21.7, 21.5 ppm. IR (KBr,  $\text{cm}^{-1}$ ): 3457, 2982, 2937, 2839, 2230, 1739, 1493, 1262, 1104, 1081, 754, 554. HRMS (ESI) calcd for  $\text{C}_{14}\text{H}_{16}\text{O}_4\text{Na}^+$  (M+Na)<sup>+</sup> 271.0946, found 271.0954. Daicel Chiralpak AD-H, n-

hexane/2-propanol = 90/10,  $v = 1.0 \text{ mL} \cdot \text{min}^{-1}$ ,  $\lambda = 254 \text{ nm}$ , retention time: 13.6 min (major) and 12.7 min (minor).

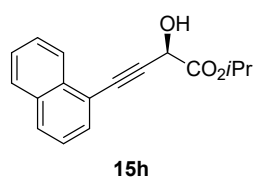

**15h:** Prepared according to the general procedure VI above and obtained as yellow oil (25.4 mg, 95% yield, 93% ee), eluent: petroleum ether/ethyl acetate (30:1 to 10:1),  $[\alpha]_D^{30} = -17.0$  ( $c = 0.43$ ,  $\text{CH}_2\text{Cl}_2$ ).  $^1\text{H NMR}$  (500 MHz,  $\text{CDCl}_3$ )  $\delta$  8.30 (d,  $J = 8.2 \text{ Hz}$ , 1H), 7.85 (d,  $J = 8.1 \text{ Hz}$ , 2H), 7.69 (d,  $J = 7.1 \text{ Hz}$ , 1H), 7.57 – 7.50 (m, 2H), 7.42 (t,  $J = 7.7 \text{ Hz}$ , 1H), 5.24 (p,  $J = 6.3 \text{ Hz}$ , 1H), 5.18 (d,  $J = 6.6 \text{ Hz}$ , 1H), 3.33 (d,  $J = 7.0 \text{ Hz}$ , 1H), 1.40 (s, 3H), 1.37 (s, 3H) ppm.  $^{13}\text{C NMR}$  (126 MHz,  $\text{CDCl}_3$ )  $\delta$  170.0, 133.4, 133.1, 130.8, 129.4, 128.3, 126.9, 126.5, 126.0, 125.1, 119.5, 89.3, 83.4, 71.1, 62.3, 21.7, 21.6 ppm. IR (KBr,  $\text{cm}^{-1}$ ): 3454, 2981, 2931, 2227, 1740, 1394, 1276, 1211, 1105, 1077, 801, 774, 566, 438. HRMS (ESI) calcd for  $\text{C}_{17}\text{H}_{16}\text{O}_3\text{Na}^+$  ( $\text{M}+\text{Na}$ ) $^+$  291.0997, found 291.1005. Daicel Chiralpak AD-H, n-hexane/2-propanol = 90/10,  $v = 1.0 \text{ mL} \cdot \text{min}^{-1}$ ,  $\lambda = 254 \text{ nm}$ , retention time: 10.0 min (major) and 9.0 min (minor).

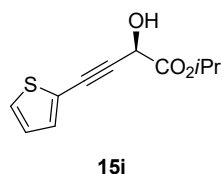

**15q:** Prepared according to the general procedure VII above and obtained as yellow oil (18.4 mg, 82% yield, 84% ee), eluent: petroleum ether/ethyl acetate (30:1 to 10:1),  $[\alpha]_D^{30} = -10.8$  ( $c = 0.67$ ,  $\text{CH}_2\text{Cl}_2$ ).  $^1\text{H NMR}$  (500 MHz,  $\text{CDCl}_3$ )  $\delta$  7.27 (d,  $J = 5.2 \text{ Hz}$ , 1H), 7.23 (d,  $J = 3.6 \text{ Hz}$ , 1H), 6.97 (dd,  $J = 5.1, 3.8 \text{ Hz}$ , 1H), 5.17 (p,  $J = 6.3 \text{ Hz}$ , 1H), 5.02 (d,  $J = 7.2 \text{ Hz}$ , 1H), 3.24 (d,  $J = 7.3 \text{ Hz}$ , 1H), 1.34 (s, 3H), 1.32 (s, 3H) ppm.  $^{13}\text{C NMR}$  (126 MHz,  $\text{CDCl}_3$ )  $\delta$  169.6, 133.0, 127.9, 127.0, 121.8, 100.0, 88.3, 78.7, 71.1, 62.2, 21.7, 21.5 ppm. IR (KBr,  $\text{cm}^{-1}$ ): 3421, 2922, 1740, 1694, 1476, 1393, 1066. HRMS (ESI) calcd for  $\text{C}_{11}\text{H}_{12}\text{O}_3\text{SNa}^+$  ( $\text{M}+\text{Na}$ ) $^+$  247.0405, found 247.0408. Daicel Chiralpak AD-H, n-hexane/2-propanol = 90/10,  $v = 1.0 \text{ mL} \cdot \text{min}^{-1}$ ,  $\lambda = 254 \text{ nm}$ , retention time: 10.4 min (major) and 9.3 min (minor).

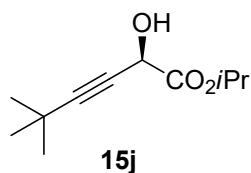

**15j**: Prepared according to the general procedure VI above and obtained as yellow oil (19.1 mg, 96% yield, 94% ee), eluent: petroleum ether/ethyl acetate (30:1 to 10:1),  $[\alpha]_D^{30} = -13.7$  ( $c = 0.75$ ,  $\text{CH}_2\text{Cl}_2$ ).  $^1\text{H NMR}$  (500 MHz,  $\text{CDCl}_3$ )  $\delta$  5.18 – 5.10 (m, 1H), 4.75 (d,  $J = 7.4$  Hz, 1H), 2.95 (d,  $J = 7.5$  Hz, 1H), 1.30 (t,  $J = 6.1$  Hz, 6H), 1.21 (s, 9H) ppm.  $^{13}\text{C NMR}$  (126 MHz,  $\text{CDCl}_3$ )  $\delta$  170.5, 94.3, 74.4, 70.3, 61.7, 30.6, 27.4, 21.6, 21.4 ppm. IR (KBr,  $\text{cm}^{-1}$ ): 3455, 2934, 1740, 1504, 1461, 1356, 1150, 1102, 972, 755, 593, 411. HRMS (ESI) calcd for  $\text{C}_{11}\text{H}_{18}\text{O}_3\text{Na}^+$  ( $\text{M}+\text{Na}$ ) $^+$  221.1154, found 221.1158. Daicel Chiralpak AD-H, n-hexane/2-propanol = 90/10,  $v = 1.0 \text{ mL} \cdot \text{min}^{-1}$ ,  $\lambda = 254 \text{ nm}$ , retention time: 20.5 min (major) and 19.0 min (minor).

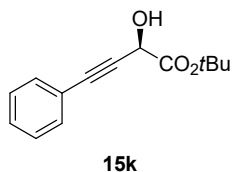

**15k**: Prepared according to the general procedure VI above and obtained as yellow oil (21.3 mg, 92% yield, 86% ee), eluent: petroleum ether/ethyl acetate (30:1 to 10:1),  $[\alpha]_D^{30} = -19.1$  ( $c = 1.05$ ,  $\text{CH}_2\text{Cl}_2$ ).  $^1\text{H NMR}$  (500 MHz,  $\text{CDCl}_3$ )  $\delta$  7.44 (dd,  $J = 7.7, 1.7$  Hz, 2H), 7.36 – 7.29 (m, 3H), 4.92 (d,  $J = 7.3$  Hz, 1H), 3.18 (d,  $J = 7.3$  Hz, 1H), 1.55 (s, 9H) ppm.  $^{13}\text{C NMR}$  (126 MHz,  $\text{CDCl}_3$ )  $\delta$  169.5, 131.9, 128.8, 128.3, 122.1, 84.9, 84.8, 84.0, 62.3, 27.9 ppm. IR (KBr,  $\text{cm}^{-1}$ ): 3445, 2956, 2851, 2488, 1741, 1604, 1464, 1305, 1101, 993, 549, 451. HRMS (ESI) calcd for  $\text{C}_{14}\text{H}_{16}\text{O}_3\text{Na}^+$  ( $\text{M}+\text{Na}$ ) $^+$  242.0919, found 242.0922. Daicel Chiralpak AD-H, n-hexane/2-propanol = 90/10,  $v = 1.0 \text{ mL} \cdot \text{min}^{-1}$ ,  $\lambda = 254 \text{ nm}$ , retention time: 9.2 min (major) and 8.0 min (minor).

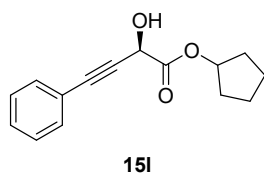

**15l**: Prepared according to the general procedure VI above and obtained as yellow oil (23.1 mg, 95% yield, 90% ee), eluent: petroleum ether/ethyl acetate (30:1 to 10:1),

$[\alpha]_D^{30} = -22.6$  ( $c = 1.21$ ,  $\text{CH}_2\text{Cl}_2$ ).  $^1\text{H NMR}$  (500 MHz,  $\text{CDCl}_3$ )  $\delta$  7.43 (d,  $J = 7.1$  Hz, 2H), 7.32 (t,  $J = 7.6$  Hz, 3H), 5.37 – 5.32 (m, 1H), 5.01 (d,  $J = 6.1$  Hz, 1H), 3.25 (d,  $J = 6.9$  Hz, 1H), 1.95 – 1.86 (m, 2H), 1.78 (dd,  $J = 22.1, 10.6$  Hz, 4H), 1.63 (s, 2H) ppm.  $^{13}\text{C NMR}$  (126 MHz,  $\text{CDCl}_3$ )  $\delta$  170.2, 131.9, 128.9, 128.3, 121.9, 85.2, 84.5, 80.1, 62.0, 32.6, 32.5, 23.6, 23.6 ppm. IR (KBr,  $\text{cm}^{-1}$ ): 3466, 2964, 2873, 2227, 1739, 1599, 1491, 1269, 1208, 1084, 1031, 758, 692, 528. HRMS (ESI) calcd for  $\text{C}_{15}\text{H}_{16}\text{O}_3\text{Na}^+$  ( $\text{M}+\text{Na}$ ) $^+$  267.0997, found 267.0999. Daicel Chiralpak AD-H, n-hexane/2-propanol = 90/10,  $v = 1.0$  mL $\cdot$ min $^{-1}$ ,  $\lambda = 254$  nm, retention time: 10.9 min (major) and 9.6 min (minor).

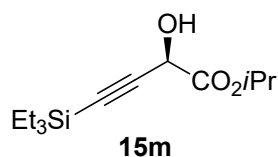

**15m:** Prepared according to the general procedure VI above and obtained as yellow oil (24.5 mg, 96% yield, 84% ee), eluent: petroleum ether/ethyl acetate (30:1 to 10:1),  $[\alpha]_D^{30} = -15.6$  ( $c = 1.01$ ,  $\text{CH}_2\text{Cl}_2$ ).  $^1\text{H NMR}$  (500 MHz,  $\text{CDCl}_3$ )  $\delta$  5.20 – 5.08 (m, 1H), 4.79 (s, 1H), 3.07 (s, 1H), 1.30 (t,  $J = 6.1$  Hz, 6H), 0.98 (t,  $J = 7.9$  Hz, 9H), 0.60 (q,  $J = 7.9$  Hz, 6H) ppm.  $^{13}\text{C NMR}$  (126 MHz,  $\text{CDCl}_3$ )  $\delta$  169.9, 101.5, 88.1, 70.8, 62.0, 21.6, 21.4, 7.3, 4.1 ppm. IR (KBr,  $\text{cm}^{-1}$ ): 3453, 2911, 2877, 2838, 1740, 1727, 1672, 1504, 1461, 1249, 1165, 1110, 1021, 839. HRMS (ESI) calcd for  $\text{C}_{13}\text{H}_{24}\text{O}_3\text{SiNa}^+$  ( $\text{M}+\text{Na}$ ) $^+$  279.1392, found 279.1395. Daicel Chiralpak AS-H, n-hexane/2-propanol = 95/5,  $v = 0.5$  mL $\cdot$ min $^{-1}$ ,  $\lambda = 210$  nm, retention time: 9.8 min (major) and 8.9 min (minor).

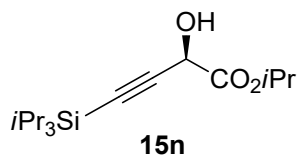

**15n:** Prepared according to the general procedure VI above and obtained as yellow oil (29.2 mg, 98% yield, 82% ee), eluent: petroleum ether/ethyl acetate (30:1 to 10:1),  $[\alpha]_D^{30} = -15.6$  ( $c = 1.01$ ,  $\text{CH}_2\text{Cl}_2$ ).  $^1\text{H NMR}$  (500 MHz,  $\text{CDCl}_3$ )  $\delta$  5.14 (d,  $J = 6.2$  Hz, 1H), 4.80 (s, 1H), 3.05 (s, 1H), 1.30 (t,  $J = 6.9$  Hz, 6H), 1.06 (s, 21H) ppm.  $^{13}\text{C NMR}$  (126 MHz,  $\text{CDCl}_3$ )  $\delta$  169.9, 102.3, 87.0, 70.8, 62.1, 21.7, 21.4, 18.5, 11.1, 1.0 ppm. IR (KBr,  $\text{cm}^{-1}$ ): 3355, 2943, 2865, 1740, 1605, 1512, 1465, 1248, 1175, 1105, 1029, 884. HRMS (ESI) calcd for  $\text{C}_{16}\text{H}_{30}\text{O}_3\text{SiNa}^+$  ( $\text{M}+\text{Na}$ ) $^+$  321.1862, found 321.1864. Daicel

Chiralpak AS-H, n-hexane/2-propanol = 95/5,  $v = 0.5 \text{ mL} \cdot \text{min}^{-1}$ ,  $\lambda = 210 \text{ nm}$ , retention time: 9.1 min (major) and 7.9 min (minor).

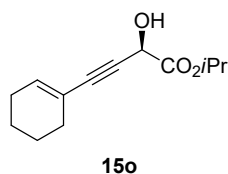

**15o:** Prepared according to the general procedure VI above and obtained as yellow oil (21.3 mg, 96% yield, 87% ee), eluent: petroleum ether/ethyl acetate (30:1 to 10:1),  $[\alpha]_D^{30} = -29.4$  ( $c = 0.93$ ,  $\text{CH}_2\text{Cl}_2$ ).  $^1\text{H NMR}$  (500 MHz,  $\text{CDCl}_3$ )  $\delta$  6.17 – 6.12 (m, 1H), 5.19 – 5.09 (m, 1H), 4.88 (s, 1H), 3.03 (s, 1H), 2.09 (d,  $J = 5.0 \text{ Hz}$ , 4H), 1.60 (dd,  $J = 10.1, 5.3 \text{ Hz}$ , 4H), 1.31 (d,  $J = 6.3 \text{ Hz}$ , 6H) ppm.  $^{13}\text{C NMR}$  (126 MHz,  $\text{CDCl}_3$ )  $\delta$  170.2, 136.5, 119.7, 87.1, 81.8, 70.7, 62.0, 29.7, 28.8, 25.6, 22.2, 21.7, 21.5, 21.4 ppm. IR (KBr,  $\text{cm}^{-1}$ ): 3455, 2942, 2908, 2862, 2840, 2179, 1740, 1601, 1499, 1249, 1164, 1025, 835, 531. HRMS (ESI) calcd for  $\text{C}_{13}\text{H}_{18}\text{O}_3\text{Na}^+$  ( $\text{M}+\text{Na}$ ) $^+$  245.1154, found 245.1155. Daicel Chiralpak AD-H, n-hexane/2-propanol = 75/25,  $v = 1.0 \text{ mL} \cdot \text{min}^{-1}$ ,  $\lambda = 254 \text{ nm}$ , retention time: 6.7 min (major) and 6.4 min (minor).

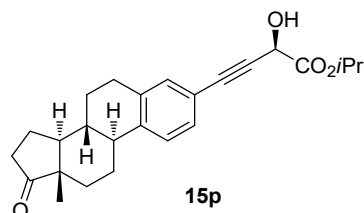

**15p:** Prepared according to the general procedure VI above and obtained as yellow oil (38.6 mg, 98% yield, 89% ee), eluent: petroleum ether/ethyl acetate (30:1 to 10:1),  $[\alpha]_D^{30} = -22.9$  ( $c = 0.63$ ,  $\text{CH}_2\text{Cl}_2$ ).  $^1\text{H NMR}$  (500 MHz,  $\text{CDCl}_3$ )  $\delta$  7.47 – 7.39 (m, 2H), 7.34 (d,  $J = 8.1 \text{ Hz}$ , 1H), 5.24 – 5.15 (m, 1H), 2.96 – 2.89 (m, 2H), 2.52 (dd,  $J = 19.0, 8.8 \text{ Hz}$ , 1H), 2.42 (dd,  $J = 12.7, 3.8 \text{ Hz}$ , 1H), 2.36 – 2.30 (m, 1H), 2.20 – 2.12 (m, 1H), 2.09 – 1.96 (m, 3H), 1.70 – 1.56 (m, 4H), 1.56 – 1.43 (m, 4H), 1.40 (d,  $J = 6.2 \text{ Hz}$ , 6H), 0.92 (s, 3H) ppm.  $^{13}\text{C NMR}$  (126 MHz,  $\text{CDCl}_3$ )  $\delta$  170.0, 140.9, 136.6, 132.3, 129.2, 125.3, 119.3, 85.3, 83.8, 70.9, 62.1, 50.5, 47.9, 44.5, 37.9, 35.8, 31.6, 29.1, 26.3, 25.6, 21.7, 21.6, 21.5, 13.8 ppm. IR (KBr,  $\text{cm}^{-1}$ ): 3453, 2931, 2225, 1739, 1459, 1261, 1104, 1008, 822. HRMS (ESI) calcd for  $\text{C}_{25}\text{H}_{30}\text{O}_4\text{Na}^+$  ( $\text{M}+\text{Na}$ ) $^+$  417.2042, found 417.2044.

Daicel Chiralpak AD-H, n-hexane/2-propanol = 75/25,  $v = 1.0 \text{ mL} \cdot \text{min}^{-1}$ ,  $\lambda = 254 \text{ nm}$ ,  
retention time: 9.5 min (major) and 8.1 min (minor).

## J) Synthesis of *cis*-allyl alcohol **3h**

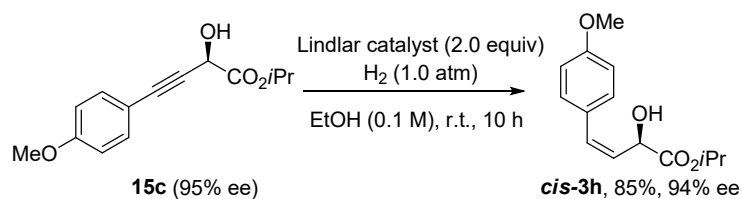

**Reaction procedure VII:** Take starting material (*R*)-**15c** (49 mg, 0.2 mmol), Lindlar catalyst (42.5 mg, 0.4 mmol) and ethanol (2 mL) in a round bottom flask, fit with a balloon fill with H<sub>2</sub>. Stirring the reaction mixture at room temperature for 10 h. Then, the reaction solution was filtrated, and the corresponding solution was concentrated under reduced pressure. Purification of mixture by column chromatography on silica gel (PE/EA = 20:1, v/v) gave the desired products *cis*-**3h**.

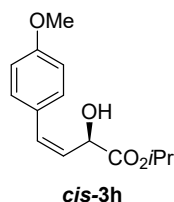

***cis*-3h:** Prepared according to the reaction procedure VII above and obtained as yellow oil (45.0 mg, 85% yield, 94% ee), eluent: petroleum ether/ethyl acetate (30:1 to 10:1),  $[\alpha]_D^{30} = -19.3$  ( $c = 0.72$ , CH<sub>2</sub>Cl<sub>2</sub>). <sup>1</sup>H NMR (500 MHz, CDCl<sub>3</sub>)  $\delta$  7.40 (d,  $J = 8.6$  Hz, 2H), 6.90 (d,  $J = 8.6$  Hz, 2H), 6.73 (d,  $J = 11.3$  Hz, 1H), 5.52 (dd,  $J = 11.1, 9.7$  Hz, 1H), 5.15 – 5.09 (m, 1H), 4.99 (dd,  $J = 9.3, 5.0$  Hz, 1H), 3.82 (s, 3H), 3.09 (d,  $J = 5.3$  Hz, 1H), 1.31 (d,  $J = 6.3$  Hz, 3H), 1.28 (d,  $J = 6.3$  Hz, 3H) ppm. <sup>13</sup>C NMR (126 MHz, CDCl<sub>3</sub>)  $\delta$  172.6, 158.3, 133.1, 129.3, 127.5, 125.0, 112.7, 69.1, 66.5, 54.3, 20.7 ppm. Daicel Chiralpak AD-H, n-hexane/2-propanol = 75/25,  $v = 1.0$  mL·min<sup>-1</sup>,  $\lambda = 254$  nm, retention time: 8.7 min (major) and 6.8 min (minor).

#### IV. X-ray Structure

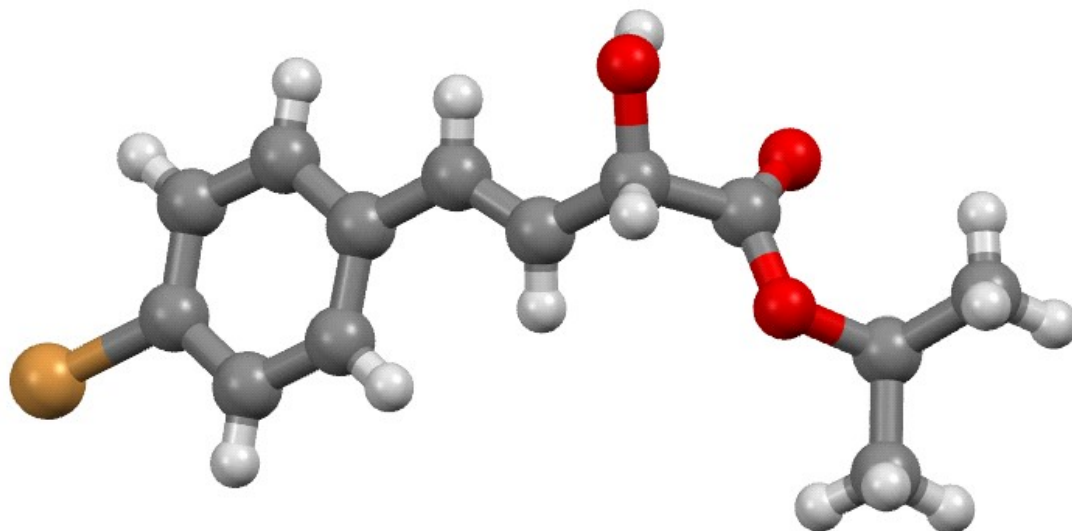

**Figure S1.** X-ray Structure of Compound 3d (CCDC 2131745)



## V. Computational Data

All of the DFT calculations conducted in this study were carried out using the Gaussian09 programs. DFT method B3LYP/D3<sup>1,2</sup> with a standard 6-31+G(d) basis set (LANL08-f<sup>3</sup> basis set for Sc atoms) was used for the geometry optimizations in solution phase (solvent = 2-isopropanol) with SMD solvent model. The M06 functional, proposed by Truhlar et al.,<sup>4</sup> was used with a 6-311+G(d,p) basis set (LANL08-f basis set for Sc atoms) to calculate the single point energies. The solvent effects were taken into consideration using single point calculations based on the gas-phase stationary points with a SMD continuum solvation model.<sup>5</sup> The energies presented in this paper are the M06 calculated Gibbs free energies in 2-isopropanol solvent with B3LYP-D3 calculated thermodynamic corrections. Molecular structures were visualized in CYLview.

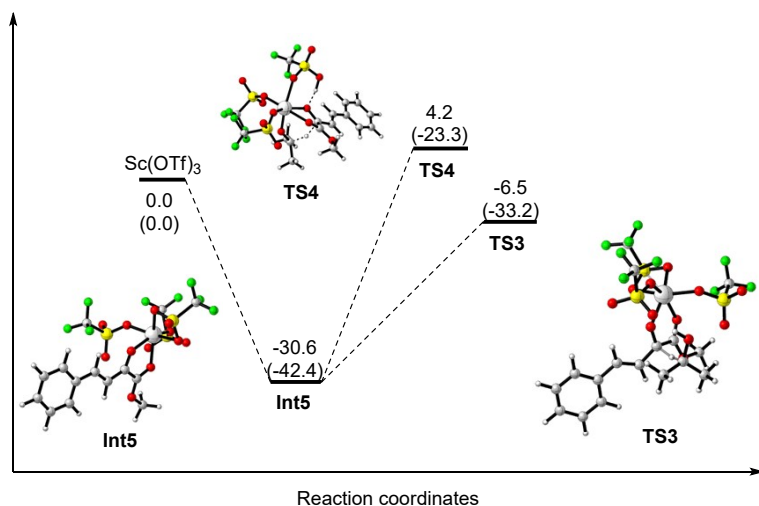

**Figure S2.** DFT-Computed free-energy profiles on the Sc(OTf)<sub>3</sub> catalyzed-Meerwein-Ponndorf-Verley reduction of  $\beta,\gamma$ -unsaturated  $\alpha$ -keto ester

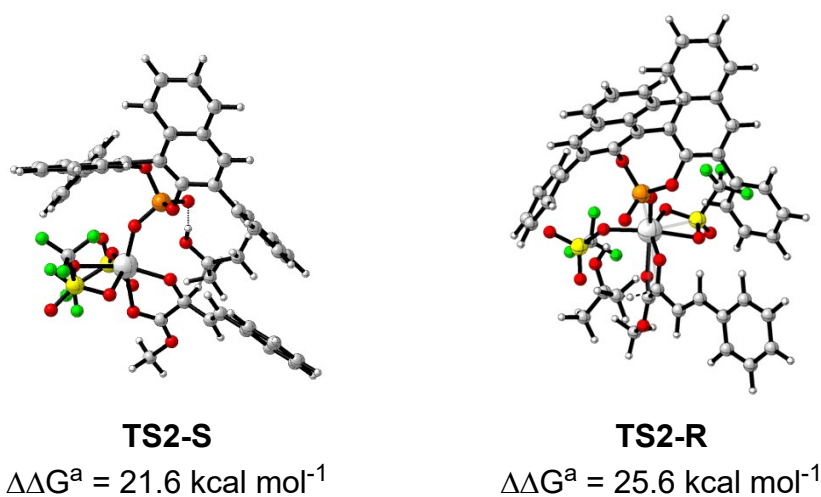

**Figure S3.** Analysis of the enantioinduction model, with optimized structures of transition states (TS2-S and TS2-R) in the outer-sphere transfer hydrogenation step.

**Table S7.** The computed energies of the intermediates and transition states

| Entry                             | E            | ZPE      | Ecorr    | Hcorr    | Gcorr    |
|-----------------------------------|--------------|----------|----------|----------|----------|
| Sc(OTf) <sub>3</sub>              | -2930.862039 | 0.087273 | 0.112705 | 0.113650 | 0.029191 |
| Sub: <b>2a</b>                    | -650.587860  | 0.187697 | 0.200494 | 0.201438 | 0.146367 |
| PA: ( <i>R</i> )- <b>1i</b>       | -1873.711834 | 0.445651 | 0.473863 | 0.474807 | 0.386344 |
| <i>i</i> PrOH                     | -194.2761094 | 0.108546 | 0.11384  | 0.114784 | 0.081311 |
| <i>i</i> PrO <sup>-</sup>         | -193.7718293 | 0.093724 | 0.098676 | 0.099621 | 0.06674  |
| TfOH                              | -961.9724966 | 0.038418 | 0.046139 | 0.047083 | 0.005431 |
| TfO <sup>-</sup>                  | -961.563247  | 0.026969 | 0.034202 | 0.035146 | -0.00585 |
| <b>Int1</b>                       | -3843.036608 | 0.507149 | 0.552774 | 0.553718 | 0.428103 |
| <b>Int2</b>                       | -4493.672731 | 0.697297 | 0.757284 | 0.758228 | 0.599149 |
| <b>Int3</b>                       | -4687.550851 | 0.794628 | 0.861388 | 0.862332 | 0.688333 |
| <b>TS1-S</b>                      | -4687.526669 | 0.790656 | 0.855851 | 0.856795 | 0.68887  |
| <b>TS1-R</b>                      | -4687.518512 | 0.78933  | 0.855169 | 0.856113 | 0.684478 |
| <b>Int4</b>                       | -4687.578581 | 0.794412 | 0.860932 | 0.861876 | 0.689896 |
| <b>TS2-S</b>                      | -4687.522291 | 0.790755 | 0.856499 | 0.857444 | 0.686337 |
| <b>TS2-R</b>                      | -4687.517585 | 0.790588 | 0.855387 | 0.856331 | 0.688067 |
| Prod: <b>3a</b>                   | -651.790105  | 0.210344 | 0.223873 | 0.224817 | 0.168443 |
| CH <sub>3</sub> COCH <sub>3</sub> | -193.081002  | 0.084253 | 0.089404 | 0.090349 | 0.056779 |
| <b>Int5</b>                       | -3581.519549 | 0.27591  | 0.316245 | 0.31719  | 0.196507 |
| <b>TS3</b>                        | -3775.778127 | 0.382323 | 0.428112 | 0.429056 | 0.2986   |
| <b>TS4</b>                        | -3775.760322 | 0.380476 | 0.426143 | 0.427087 | 0.297893 |

### Coordinates of the intermediates and transition states:

#### 1) Sc(OTf)<sub>3</sub>

|    |           |           |           |
|----|-----------|-----------|-----------|
| S  | -2.398184 | -1.825304 | 0.08212   |
| O  | -1.68326  | -1.485218 | -1.211916 |
| O  | -1.502963 | -1.180087 | 1.130119  |
| C  | 3.118507  | -2.517834 | 0.261698  |
| S  | 2.69077   | -0.790738 | -0.314907 |
| F  | 3.920538  | -2.436142 | 1.316816  |
| F  | 1.989638  | -3.146566 | 0.591889  |
| F  | 3.722517  | -3.159423 | -0.732061 |
| O  | 1.852738  | -0.210952 | 0.819831  |
| O  | 3.927418  | -0.113562 | -0.661984 |
| O  | 1.656516  | -1.012997 | -1.40178  |
| Sc | -0.060137 | -0.239109 | -0.226156 |
| C  | 0.928436  | 3.523267  | 0.543096  |
| S  | -0.331298 | 2.571193  | -0.461523 |
| F  | 0.284487  | 4.261542  | 1.440562  |
| F  | 1.744277  | 2.669035  | 1.152912  |
| F  | 1.616256  | 4.299937  | -0.287149 |
| O  | -1.011165 | 1.619454  | 0.512447  |
| O  | -1.159575 | 3.550781  | -1.143083 |
| O  | 0.490383  | 1.612421  | -1.309385 |
| C  | -3.951547 | -0.779847 | 0.097941  |
| F  | -3.644715 | 0.466838  | -0.251134 |
| F  | -4.454439 | -0.798614 | 1.328192  |
| F  | -4.822209 | -1.293387 | -0.763993 |
| O  | -2.807248 | -3.202793 | 0.300439  |

#### 2) Sub: 2a

|   |          |          |          |
|---|----------|----------|----------|
| C | 3.111497 | -1.13199 | 0.00145  |
| C | 4.41099  | -0.63008 | 0.002062 |
| C | 4.623894 | 0.750563 | 0.000552 |
| C | 3.530515 | 1.626203 | -0.00167 |
| C | 2.232318 | 1.128122 | -0.00222 |
| H | 2.944196 | -2.20623 | 0.002566 |
| H | 5.255329 | -1.31386 | 0.00366  |
| H | 5.63616  | 1.145736 | 0.001013 |
| H | 3.695525 | 2.700163 | -0.00301 |
| H | 1.396497 | 1.821212 | -0.00418 |
| C | -1.76893 | -0.96908 | -0.00037 |
| C | -3.10934 | -0.19365 | -3.4E-05 |
| O | -1.84989 | -2.19425 | -0.00115 |
| O | -4.18465 | -0.7576  | -0.00077 |

|   |          |          |          |
|---|----------|----------|----------|
| O | -2.94266 | 1.131445 | 0.001079 |
| C | -4.1517  | 1.926546 | 0.001512 |
| H | -3.8174  | 2.963879 | 0.002422 |
| H | -4.74217 | 1.713141 | -0.89359 |
| H | -4.74253 | 1.711644 | 0.89602  |
| C | 2.000073 | -0.26442 | -0.0005  |
| C | 0.668446 | -0.8527  | -0.00064 |
| H | 0.638945 | -1.94198 | -0.00124 |
| C | -0.52333 | -0.20694 | 0.000156 |
| H | -0.5935  | 0.874023 | 0.001192 |

### 3) PA: (R)-1i

|   |           |           |           |
|---|-----------|-----------|-----------|
| C | -2.589761 | 4.247086  | 2.359739  |
| C | -1.18413  | 4.25331   | 2.189652  |
| C | -0.558164 | 3.259342  | 1.469072  |
| C | -1.305942 | 2.204154  | 0.877343  |
| C | -2.724204 | 2.17625   | 1.087881  |
| C | -3.340527 | 3.225774  | 1.823961  |
| C | -0.700924 | 1.147462  | 0.114931  |
| C | -1.505035 | 0.104215  | -0.308885 |
| C | -2.90745  | 0.037073  | -0.087584 |
| C | -3.488678 | 1.091576  | 0.589826  |
| C | 0.762929  | 1.10746   | -0.17023  |
| C | 1.431121  | 2.152608  | -0.894206 |
| C | 2.849311  | 2.061988  | -1.08322  |
| C | 3.553113  | 0.935247  | -0.590872 |
| C | 2.912101  | -0.108693 | 0.048902  |
| C | 1.50692   | 0.010255  | 0.230883  |
| C | 0.744143  | 3.258122  | -1.467693 |
| C | 1.428599  | 4.238287  | -2.152937 |
| C | 2.83494   | 4.16798   | -2.302741 |
| C | 3.527376  | 3.098704  | -1.782381 |
| O | -0.902082 | -0.973866 | -0.978673 |
| O | 0.840956  | -1.059148 | 0.857299  |
| P | -0.048278 | -2.026512 | -0.087514 |
| O | 0.644449  | -3.000628 | -0.958503 |
| O | -1.006604 | -2.599444 | 1.05598   |
| C | -3.706732 | -1.140055 | -0.515243 |
| C | 3.665472  | -1.307356 | 0.499829  |
| C | -3.609119 | -1.668416 | -1.81395  |
| C | -4.377909 | -2.769638 | -2.190288 |
| C | -5.25296  | -3.364529 | -1.276725 |
| C | -5.357311 | -2.847593 | 0.016687  |

|   |           |           |           |
|---|-----------|-----------|-----------|
| C | -4.590046 | -1.744652 | 0.394679  |
| C | 4.591333  | -1.913155 | -0.365712 |
| C | 5.330951  | -3.022617 | 0.045847  |
| C | 5.157003  | -3.544976 | 1.329436  |
| C | 4.238817  | -2.949378 | 2.199004  |
| C | 3.497513  | -1.841588 | 1.789007  |
| H | -3.069541 | 5.041909  | 2.924301  |
| H | -0.592005 | 5.047498  | 2.636359  |
| H | 0.520038  | 3.275954  | 1.359549  |
| H | -4.418159 | 3.196984  | 1.965184  |
| H | -4.561511 | 1.087094  | 0.762592  |
| H | 4.629617  | 0.891683  | -0.731477 |
| H | -0.33369  | 3.32385   | -1.372872 |
| H | 0.882827  | 5.07143   | -2.587446 |
| H | 3.360988  | 4.952779  | -2.839407 |
| H | 4.604756  | 3.021968  | -1.906691 |
| H | -1.51941  | -3.374743 | 0.754765  |
| H | -4.294665 | -3.161998 | -3.200508 |
| H | -6.030835 | -3.306337 | 0.735995  |
| H | 6.0376    | -3.482449 | -0.640216 |
| H | 4.101187  | -3.345665 | 3.201775  |
| H | 5.730445  | -4.410954 | 1.649663  |
| H | 4.717114  | -1.52131  | -1.371366 |
| H | 2.793892  | -1.37979  | 2.474121  |
| H | -4.660302 | -1.356915 | 1.407312  |
| H | -5.847285 | -4.225734 | -1.570654 |
| H | -2.937133 | -1.208366 | -2.531174 |

#### 4) *i*PrOH

|   |           |           |           |
|---|-----------|-----------|-----------|
| O | 0.000003  | 1.418275  | 0.022465  |
| C | 0         | 0.03624   | -0.37599  |
| H | 0.000003  | 0.071608  | -1.472908 |
| C | 1.270206  | -0.666977 | 0.100357  |
| H | 2.160329  | -0.132788 | -0.250907 |
| H | 1.30075   | -0.701377 | 1.197854  |
| H | 1.315103  | -1.697372 | -0.27223  |
| C | -1.270205 | -0.666979 | 0.100354  |
| H | -1.300739 | -0.701405 | 1.197851  |
| H | -2.160329 | -0.132779 | -0.250891 |
| H | -1.315107 | -1.697366 | -0.272255 |
| H | -0.000038 | 1.431573  | 0.995448  |

#### 5) *i*PrO<sup>-</sup>

|   |           |           |           |
|---|-----------|-----------|-----------|
| O | 0         | 1.432117  | 0.149343  |
| C | 0         | 0.170358  | -0.333913 |
| H | 0         | 0.10543   | -1.474319 |
| C | 1.26273   | -0.636936 | 0.087209  |
| H | 2.166459  | -0.096776 | -0.228274 |
| H | 1.298654  | -0.721131 | 1.18416   |
| H | 1.306336  | -1.652734 | -0.337616 |
| C | -1.26273  | -0.636936 | 0.087209  |
| H | -1.298655 | -0.721131 | 1.18416   |
| H | -2.166459 | -0.096775 | -0.228273 |
| H | -1.306336 | -1.652733 | -0.337617 |

6) TfOH

|   |           |           |           |
|---|-----------|-----------|-----------|
| H | -1.33736  | 1.967997  | 0.061736  |
| C | 1.011558  | 0.008433  | 0.0043    |
| S | -0.852835 | -0.140144 | -0.055936 |
| F | 1.374541  | 1.132066  | -0.610944 |
| F | 1.413764  | 0.03136   | 1.270348  |
| F | 1.534108  | -1.042535 | -0.621793 |
| O | -1.275207 | 1.220075  | 0.697468  |
| O | -1.24036  | -0.093527 | -1.460554 |
| O | -1.232977 | -1.234586 | 0.821704  |

7) TfO<sup>-</sup>

|   |           |           |           |
|---|-----------|-----------|-----------|
| C | 0.953031  | -0.000154 | 0.000441  |
| S | -0.906445 | 0.000102  | -0.000048 |
| F | 1.431066  | -1.137452 | 0.535008  |
| F | 1.430789  | 0.105395  | -1.251954 |
| F | 1.432079  | 1.031458  | 0.717627  |
| O | -1.243478 | -1.19233  | -0.81562  |
| O | -1.246035 | -0.10967  | 1.439733  |
| O | -1.243046 | 1.302586  | -0.625113 |

8) Int1

|   |          |          |          |
|---|----------|----------|----------|
| C | 7.608333 | 0.090586 | -1.19651 |
| C | 6.799583 | 1.10903  | -1.7572  |
| C | 5.484214 | 1.255107 | -1.3728  |
| C | 4.907781 | 0.387438 | -0.40472 |
| C | 5.716361 | -0.66908 | 0.132156 |
| C | 7.07455  | -0.78166 | -0.27549 |
| C | 3.542696 | 0.499777 | 0.028704 |

|   |          |          |          |
|---|----------|----------|----------|
| C | 3.057622 | -0.47716 | 0.878488 |
| C | 3.82548  | -1.53905 | 1.421717 |
| C | 5.153621 | -1.59697 | 1.044145 |
| C | 2.644619 | 1.601312 | -0.4287  |
| C | 2.951175 | 2.983649 | -0.1806  |
| C | 2.048274 | 3.987165 | -0.66519 |
| C | 0.855611 | 3.603218 | -1.32679 |
| C | 0.515726 | 2.276743 | -1.51536 |
| C | 1.445343 | 1.307885 | -1.05277 |
| C | 4.091087 | 3.40312  | 0.559547 |
| C | 4.345386 | 4.741895 | 0.76596  |
| C | 3.476297 | 5.73265  | 0.247777 |
| C | 2.348552 | 5.360471 | -0.44739 |
| O | 1.676986 | -0.44568 | 1.218027 |
| O | 1.097984 | -0.05847 | -1.22455 |
| P | 0.656272 | -0.87141 | 0.075354 |
| O | -0.74407 | -0.54393 | 0.566109 |
| O | 0.85927  | -2.37307 | -0.30827 |
| C | 3.226885 | -2.55588 | 2.324146 |
| C | -0.78517 | 1.898846 | -2.12668 |
| C | 2.442038 | -2.18478 | 3.429868 |
| C | 1.901396 | -3.15646 | 4.272016 |
| C | 2.132838 | -4.51286 | 4.022762 |
| C | 2.913169 | -4.8913  | 2.927409 |
| C | 3.456042 | -3.92051 | 2.083744 |
| C | -1.96566 | 2.521774 | -1.68062 |
| C | -3.20604 | 2.18089  | -2.22923 |
| C | -3.2801  | 1.234223 | -3.25704 |
| C | -2.10966 | 0.628137 | -3.72293 |
| C | -0.87332 | 0.951879 | -3.16086 |
| H | 8.645781 | -0.00579 | -1.50434 |
| H | 7.219583 | 1.780148 | -2.50132 |
| H | 4.878496 | 2.035066 | -1.81969 |
| H | 7.679378 | -1.57831 | 0.150046 |
| H | 5.785503 | -2.38287 | 1.44819  |
| H | 0.184138 | 4.379108 | -1.68369 |
| H | 4.763917 | 2.66122  | 0.973328 |
| H | 5.220601 | 5.039901 | 1.336662 |
| H | 3.696249 | 6.783694 | 0.41278  |
| H | 1.661254 | 6.108959 | -0.83333 |
| H | 1.303481 | -2.85347 | 5.127739 |
| H | 3.095239 | -5.94325 | 2.72379  |
| H | -4.10683 | 2.662519 | -1.85936 |
| H | -2.15793 | -0.10599 | -4.52084 |



|    |          |          |          |
|----|----------|----------|----------|
| H  | -4.24153 | 0.970182 | -3.6888  |
| H  | -1.91517 | 3.254093 | -0.88033 |
| H  | 0.027392 | 0.471635 | -3.52899 |
| H  | 4.047577 | -4.2189  | 1.222564 |
| H  | 1.708513 | -5.26842 | 4.678709 |
| H  | 2.267618 | -1.13344 | 3.636873 |
| C  | -2.13487 | -3.01586 | -3.00919 |
| S  | -2.71104 | -3.1702  | -1.24275 |
| F  | -1.87319 | -4.23149 | -3.48232 |
| F  | -1.02566 | -2.27197 | -3.04321 |
| F  | -3.08705 | -2.44    | -3.74032 |
| O  | -1.52844 | -3.62721 | -0.47871 |
| O  | -3.89216 | -4.02556 | -1.2337  |
| O  | -3.04857 | -1.70109 | -0.93994 |
| C  | -5.00006 | 1.634788 | 3.096923 |
| S  | -4.35443 | 1.951447 | 1.373618 |
| F  | -4.50431 | 0.476272 | 3.5309   |
| F  | -6.32598 | 1.575487 | 3.052392 |
| F  | -4.6066  | 2.623823 | 3.890822 |
| O  | -4.73564 | 0.708296 | 0.582854 |
| O  | -2.84849 | 1.807759 | 1.478618 |
| O  | -4.89469 | 3.226384 | 0.931154 |
| Sc | -2.71249 | -0.14506 | 0.338542 |
| H  | 0.011443 | -2.90137 | -0.38264 |

### 9) Int2

|   |           |           |           |
|---|-----------|-----------|-----------|
| C | -7.628275 | -1.567975 | -2.08449  |
| C | -6.825917 | -2.732396 | -2.165165 |
| C | -5.597327 | -2.785281 | -1.543019 |
| C | -5.105765 | -1.67175  | -0.807679 |
| C | -5.901669 | -0.479993 | -0.759236 |
| C | -7.172586 | -0.465223 | -1.398618 |
| C | -3.830087 | -1.674958 | -0.148652 |
| C | -3.391904 | -0.491113 | 0.41889   |
| C | -4.153832 | 0.705396  | 0.486236  |
| C | -5.410016 | 0.669721  | -0.092586 |
| C | -2.96703  | -2.8909   | -0.088494 |
| C | -3.409113 | -4.11019  | 0.530856  |
| C | -2.520807 | -5.236473 | 0.540644  |
| C | -1.214542 | -5.109999 | 0.006622  |
| C | -0.751824 | -3.922685 | -0.529275 |
| C | -1.672722 | -2.84426  | -0.571587 |

|   |           |           |           |
|---|-----------|-----------|-----------|
| C | -4.673654 | -4.243482 | 1.168371  |
| C | -5.054425 | -5.438628 | 1.739678  |
| C | -4.194333 | -6.563214 | 1.707407  |
| C | -2.951786 | -6.459803 | 1.125224  |
| O | -2.077404 | -0.450037 | 0.95243   |
| O | -1.212115 | -1.622022 | -1.125253 |
| P | -0.879402 | -0.445197 | -0.106494 |
| O | 0.411771  | -0.591198 | 0.670686  |
| O | -0.951443 | 0.817901  | -1.047335 |
| C | -3.644451 | 1.939983  | 1.138296  |
| C | 0.661328  | -3.770958 | -0.961188 |
| C | -2.983344 | 1.90169   | 2.380311  |
| C | -2.578544 | 3.081286  | 3.006072  |
| C | -2.83113  | 4.319834  | 2.408311  |
| C | -3.478272 | 4.369486  | 1.171458  |
| C | -3.873805 | 3.190539  | 0.538173  |
| C | 1.68553   | -4.209798 | -0.1042   |
| C | 3.024544  | -4.087402 | -0.475931 |
| C | 3.360788  | -3.525098 | -1.709714 |
| C | 2.350261  | -3.084733 | -2.568307 |
| C | 1.010282  | -3.201118 | -2.197136 |
| H | -8.597006 | -1.545302 | -2.575752 |
| H | -7.180656 | -3.59152  | -2.727885 |
| H | -4.992746 | -3.681514 | -1.623757 |
| H | -7.770568 | 0.440944  | -1.344192 |
| H | -6.042969 | 1.551128  | -0.044447 |
| H | -0.551258 | -5.969727 | 0.040621  |
| H | -5.34345  | -3.392745 | 1.213952  |
| H | -6.023727 | -5.517487 | 2.22424   |
| H | -4.5133   | -7.500209 | 2.155341  |
| H | -2.271574 | -7.307649 | 1.113811  |
| H | -0.294142 | 1.516281  | -0.800238 |
| H | -2.075498 | 3.031291  | 3.968049  |
| H | -3.666331 | 5.325408  | 0.691608  |
| H | 3.802967  | -4.416147 | 0.205414  |
| H | 2.604205  | -2.63454  | -3.522358 |
| H | 4.40283   | -3.41704  | -1.993186 |
| H | 1.42879   | -4.629447 | 0.864697  |
| H | 0.232583  | -2.854716 | -2.870208 |
| H | -4.361079 | 3.238399  | -0.43168  |
| H | -2.521238 | 5.237573  | 2.90051   |
| H | -2.809396 | 0.949561  | 2.870544  |

|    |           |           |           |
|----|-----------|-----------|-----------|
| C  | 1.152073  | 2.519684  | 2.484922  |
| C  | 0.796625  | 3.001976  | 1.089827  |
| O  | 1.749972  | 1.434352  | 2.585306  |
| O  | 1.133225  | 2.160018  | 0.188836  |
| C  | 4.542007  | 0.376731  | -2.833529 |
| S  | 2.72652   | 0.764015  | -2.690328 |
| F  | 5.019009  | 0.918133  | -3.956106 |
| F  | 4.736581  | -0.943602 | -2.859373 |
| F  | 5.189086  | 0.895283  | -1.782454 |
| O  | 2.057366  | 0.0424    | -3.77494  |
| O  | 2.633531  | 2.228791  | -2.657803 |
| O  | 2.43104   | 0.12993   | -1.326033 |
| C  | 5.528134  | -1.79613  | 1.171552  |
| S  | 4.368366  | -0.762455 | 2.208321  |
| F  | 6.769049  | -1.354078 | 1.355936  |
| F  | 5.191896  | -1.673709 | -0.112701 |
| F  | 5.439094  | -3.069935 | 1.548251  |
| O  | 4.327392  | 0.564369  | 1.473343  |
| O  | 4.890604  | -0.772415 | 3.566635  |
| O  | 2.986262  | -1.331934 | 1.975879  |
| Sc | 2.252398  | 0.390368  | 0.697078  |
| C  | -0.890778 | 5.769113  | -0.823869 |
| C  | -1.244307 | 6.802002  | 0.084238  |
| C  | -1.248765 | 5.899002  | -2.190233 |
| C  | -1.935686 | 7.91456   | -0.366401 |
| H  | -0.971024 | 6.724364  | 1.130941  |
| C  | -1.946794 | 7.014452  | -2.631789 |
| H  | -0.97539  | 5.110253  | -2.885489 |
| C  | -2.290905 | 8.020722  | -1.72113  |
| H  | -2.204816 | 8.704925  | 0.327402  |
| H  | -2.223515 | 7.106318  | -3.677466 |
| H  | -2.836567 | 8.894826  | -2.065515 |
| O  | 0.783804  | 3.265735  | 3.475916  |
| C  | 1.054814  | 2.785143  | 4.831525  |
| H  | 2.134869  | 2.71589   | 4.974728  |
| H  | 0.615093  | 3.536526  | 5.484083  |
| H  | 0.57921   | 1.811691  | 4.965783  |
| C  | 0.151486  | 4.222858  | 0.865164  |
| H  | -0.072282 | 4.840876  | 1.724147  |
| C  | -0.207727 | 4.58244   | -0.422723 |
| H  | 0.041552  | 3.882775  | -1.21908  |

**10) Int3**

|   |          |          |          |
|---|----------|----------|----------|
| C | 8.101006 | -0.51706 | 2.058861 |
| C | 7.468321 | -1.78048 | 2.157305 |
| C | 6.25173  | -2.00697 | 1.550608 |
| C | 5.602832 | -0.97884 | 0.812997 |
| C | 6.225336 | 0.311035 | 0.747278 |
| C | 7.488651 | 0.506432 | 1.371919 |
| C | 4.336998 | -1.16656 | 0.161743 |
| C | 3.73225  | -0.06125 | -0.41267 |
| C | 4.322492 | 1.229    | -0.49578 |
| C | 5.574425 | 1.374944 | 0.074572 |
| C | 3.65573  | -2.49365 | 0.103156 |
| C | 4.268706 | -3.63715 | -0.51629 |
| C | 3.547001 | -4.87661 | -0.53721 |
| C | 2.233145 | -4.93756 | -0.00958 |
| C | 1.605208 | -3.82881 | 0.525907 |
| C | 2.362964 | -2.62866 | 0.576576 |
| C | 5.54162  | -3.58848 | -1.14968 |
| C | 6.087915 | -4.714   | -1.72798 |
| C | 5.393329 | -5.94792 | -1.70701 |
| C | 4.14691  | -6.02332 | -1.12853 |
| O | 2.434033 | -0.21014 | -0.94583 |
| O | 1.732473 | -1.48803 | 1.124287 |
| P | 1.221465 | -0.37237 | 0.096346 |
| O | -0.01751 | -0.67987 | -0.69161 |
| O | 1.138794 | 0.885901 | 1.050329 |
| C | 3.645669 | 2.373041 | -1.16175 |
| C | 0.179415 | -3.87583 | 0.941195 |
| C | 2.992902 | 2.226975 | -2.40019 |
| C | 2.426142 | 3.330037 | -3.03952 |
| C | 2.504083 | 4.599084 | -2.45796 |
| C | 3.141095 | 4.755241 | -1.2248  |
| C | 3.700742 | 3.651701 | -0.57957 |
| C | -0.76242 | -4.45618 | 0.074682 |
| C | -2.11375 | -4.50047 | 0.417712 |
| C | -2.54575 | -3.96531 | 1.633465 |
| C | -1.61542 | -3.39528 | 2.507304 |
| C | -0.26447 | -3.34516 | 2.164306 |
| H | 9.063246 | -0.35683 | 2.537483 |
| H | 7.945022 | -2.57814 | 2.720483 |
| H | 5.776621 | -2.97694 | 1.643927 |
| H | 7.955473 | 1.485859 | 1.303999 |
| H | 6.0796   | 2.334641 | 0.012405 |
| H | 1.698452 | -5.88249 | -0.0514  |

|    |          |          |          |
|----|----------|----------|----------|
| H  | 6.084877 | -2.65168 | -1.18734 |
| H  | 7.059605 | -4.65207 | -2.21038 |
| H  | 5.840804 | -6.82774 | -2.16117 |
| H  | 3.59168  | -6.95802 | -1.12601 |
| H  | 0.390549 | 1.485362 | 0.796626 |
| H  | 1.929477 | 3.19792  | -3.99712 |
| H  | 3.191413 | 5.734016 | -0.7568  |
| H  | -2.82813 | -4.92723 | -0.2784  |
| H  | -1.94328 | -2.9646  | 3.447712 |
| H  | -3.60085 | -3.97545 | 1.889028 |
| H  | -0.43668 | -4.84544 | -0.886   |
| H  | 0.447    | -2.89045 | 2.845731 |
| H  | 4.178713 | 3.779339 | 0.387675 |
| H  | 2.063372 | 5.457729 | -2.95735 |
| H  | 2.948619 | 1.252672 | -2.8747  |
| C  | -1.14962 | 2.167204 | -2.48432 |
| C  | -0.87482 | 2.754327 | -1.10379 |
| O  | -1.57052 | 1.011087 | -2.56243 |
| O  | -1.06021 | 1.92639  | -0.17181 |
| C  | -3.98619 | -0.20533 | 3.134911 |
| S  | -2.2375  | 0.377632 | 2.854572 |
| F  | -4.35701 | 0.103908 | 4.382776 |
| F  | -4.07394 | -1.53028 | 2.969817 |
| F  | -4.82223 | 0.390787 | 2.275408 |
| O  | -1.45452 | -0.23605 | 3.936402 |
| O  | -2.32599 | 1.845974 | 2.820223 |
| O  | -1.90943 | -0.238   | 1.509011 |
| C  | -5.15785 | -2.65815 | -0.77356 |
| S  | -3.97587 | -2.37644 | -2.2169  |
| F  | -6.40608 | -2.40344 | -1.18082 |
| F  | -4.87209 | -1.86094 | 0.262266 |
| F  | -5.0909  | -3.93064 | -0.36225 |
| O  | -4.63943 | -1.36735 | -3.05756 |
| O  | -3.76302 | -3.71224 | -2.7922  |
| O  | -2.72106 | -1.85264 | -1.53609 |
| Sc | -2.13654 | -0.03227 | -0.58147 |
| C  | -4.74479 | 1.8436   | -0.91229 |
| H  | -4.61103 | 2.214605 | -1.9425  |
| C  | -4.57329 | 3.015269 | 0.057497 |
| H  | -5.32393 | 3.792707 | -0.13135 |
| H  | -4.67995 | 2.667192 | 1.090837 |
| H  | -3.57835 | 3.461982 | -0.05183 |
| C  | -6.12257 | 1.188022 | -0.80319 |
| H  | -6.1969  | 0.343609 | -1.49611 |

|   |          |          |          |
|---|----------|----------|----------|
| H | -6.28337 | 0.813913 | 0.21443  |
| H | -6.91661 | 1.9065   | -1.04086 |
| O | -3.74867 | 0.876356 | -0.66812 |
| C | 0.260326 | 5.902901 | 0.656738 |
| C | 0.5261   | 6.90378  | -0.31026 |
| C | 0.493008 | 6.190971 | 2.022196 |
| C | 1.011945 | 8.142142 | 0.083603 |
| H | 0.353388 | 6.705382 | -1.36262 |
| C | 0.98226  | 7.43319  | 2.409736 |
| H | 0.290881 | 5.425028 | 2.766126 |
| C | 1.243145 | 8.408611 | 1.441662 |
| H | 1.214648 | 8.906222 | -0.66094 |
| H | 1.16151  | 7.644177 | 3.459742 |
| H | 1.625581 | 9.380069 | 1.742585 |
| O | -0.88412 | 2.944606 | -3.49766 |
| C | -1.07806 | 2.389665 | -4.83165 |
| H | -2.12963 | 2.125863 | -4.96395 |
| H | -0.78498 | 3.186353 | -5.51283 |
| H | -0.44239 | 1.510081 | -4.95318 |
| C | -0.447   | 4.094003 | -0.9446  |
| H | -0.30498 | 4.685117 | -1.83905 |
| C | -0.21175 | 4.589057 | 0.315122 |
| H | -0.39032 | 3.915259 | 1.152215 |

#### 11) TS1-S

|   |          |           |           |
|---|----------|-----------|-----------|
| C | 8.153966 | -0.351173 | 1.846945  |
| C | 7.56808  | -1.637217 | 1.944444  |
| C | 6.338252 | -1.894296 | 1.378111  |
| C | 5.629147 | -0.875918 | 0.683539  |
| C | 6.204287 | 0.435737  | 0.6207    |
| C | 7.482607 | 0.663006  | 1.202713  |
| C | 4.349168 | -1.095878 | 0.072706  |
| C | 3.687347 | -0.003103 | -0.462724 |
| C | 4.225334 | 1.310388  | -0.532801 |
| C | 5.491581 | 1.488991  | -0.004163 |
| C | 3.708591 | -2.442902 | 0.013184  |
| C | 4.328493 | -3.555375 | -0.653783 |
| C | 3.631607 | -4.808744 | -0.693243 |
| C | 2.330098 | -4.910035 | -0.141406 |
| C | 1.697263 | -3.831424 | 0.446062  |
| C | 2.435693 | -2.621057 | 0.524533  |
| C | 5.582378 | -3.461421 | -1.319388 |
| C | 6.136103 | -4.558186 | -1.943939 |

|   |           |           |           |
|---|-----------|-----------|-----------|
| C | 5.467929  | -5.806795 | -1.940779 |
| C | 4.238875  | -5.925038 | -1.333108 |
| O | 2.380836  | -0.193544 | -0.965254 |
| O | 1.797866  | -1.505542 | 1.121105  |
| P | 1.205162  | -0.418377 | 0.106146  |
| O | -0.028322 | -0.833222 | -0.64909  |
| O | 1.031911  | 0.845534  | 1.028236  |
| C | 3.479588  | 2.447943  | -1.133148 |
| C | 0.273546  | -3.908255 | 0.866413  |
| C | 2.783929  | 2.321012  | -2.349728 |
| C | 2.146212  | 3.423067  | -2.920609 |
| C | 2.191951  | 4.670286  | -2.290224 |
| C | 2.874575  | 4.807322  | -1.079465 |
| C | 3.505912  | 3.704858  | -0.503003 |
| C | -0.677399 | -4.384517 | -0.052255 |
| C | -2.030522 | -4.434274 | 0.285758  |
| C | -2.451853 | -4.015755 | 1.550759  |
| C | -1.51096  | -3.554743 | 2.475467  |
| C | -0.159394 | -3.492436 | 2.135493  |
| H | 9.127585  | -0.166645 | 2.292643  |
| H | 8.091747  | -2.427989 | 2.474638  |
| H | 5.899696  | -2.881557 | 1.469179  |
| H | 7.913131  | 1.659065  | 1.136568  |
| H | 5.958218  | 2.468431  | -0.059232 |
| H | 1.805527  | -5.85907  | -0.21076  |
| H | 6.105052  | -2.512631 | -1.344079 |
| H | 7.093141  | -4.461928 | -2.44948  |
| H | 5.921293  | -6.663581 | -2.431643 |
| H | 3.70275   | -6.870776 | -1.34386  |
| H | 0.231567  | 1.377958  | 0.72559   |
| H | 1.620514  | 3.30815   | -3.864508 |
| H | 2.899913  | 5.767336  | -0.572592 |
| H | -2.754003 | -4.778793 | -0.446434 |
| H | -1.832571 | -3.210513 | 3.452758  |
| H | -3.507086 | -4.02766  | 1.805547  |
| H | -0.355739 | -4.688356 | -1.044728 |
| H | 0.561344  | -3.113392 | 2.85321   |
| H | 4.0142    | 3.81492   | 0.450829  |
| H | 1.693531  | 5.527031  | -2.735481 |
| H | 2.761472  | 1.364903  | -2.861546 |
| C | -1.312243 | 2.024084  | -2.39113  |
| C | -1.339636 | 2.612294  | -0.981364 |
| O | -1.516752 | 0.810489  | -2.511083 |
| O | -1.202593 | 1.666687  | -0.087418 |

|    |           |           |           |
|----|-----------|-----------|-----------|
| C  | -3.903798 | -0.367234 | 3.295013  |
| S  | -2.152111 | 0.116205  | 2.890544  |
| F  | -4.204519 | 0.045078  | 4.530897  |
| F  | -4.048054 | -1.696069 | 3.228982  |
| F  | -4.747221 | 0.204505  | 2.426172  |
| O  | -1.311482 | -0.549932 | 3.893233  |
| O  | -2.149982 | 1.585924  | 2.86818   |
| O  | -2.004388 | -0.520743 | 1.517533  |
| C  | -5.33022  | -2.557909 | -0.63381  |
| S  | -4.422099 | -2.092402 | -2.20754  |
| F  | -6.644636 | -2.439495 | -0.841552 |
| F  | -4.979204 | -1.755374 | 0.382036  |
| F  | -5.056882 | -3.823157 | -0.293683 |
| O  | -5.138385 | -0.918147 | -2.724371 |
| O  | -4.42055  | -3.315406 | -3.02017  |
| O  | -3.026064 | -1.765283 | -1.690297 |
| Sc | -2.102572 | -0.226776 | -0.540263 |
| C  | -3.912516 | 2.277453  | -0.810516 |
| H  | -2.710654 | 2.793444  | -1.036775 |
| C  | -4.295318 | 3.102666  | 0.401964  |
| H  | -4.302433 | 4.17227   | 0.173458  |
| H  | -5.303994 | 2.802457  | 0.715582  |
| H  | -3.605567 | 2.899761  | 1.226541  |
| C  | -4.595379 | 2.590948  | -2.129871 |
| H  | -4.143747 | 2.016239  | -2.943627 |
| H  | -5.647859 | 2.289693  | -2.046375 |
| H  | -4.553713 | 3.659846  | -2.357796 |
| O  | -3.685797 | 1.000495  | -0.574138 |
| C  | 0.21907   | 5.614906  | 0.825064  |
| C  | 0.131657  | 6.752715  | -0.00317  |
| C  | 0.958274  | 5.7064    | 2.020357  |
| C  | 0.783176  | 7.931748  | 0.345936  |
| H  | -0.451751 | 6.716001  | -0.918164 |
| C  | 1.615406  | 6.886556  | 2.365325  |
| H  | 1.029223  | 4.835684  | 2.667636  |
| C  | 1.533311  | 8.001764  | 1.527022  |
| H  | 0.707064  | 8.801241  | -0.30145  |
| H  | 2.190497  | 6.936183  | 3.28594   |
| H  | 2.044162  | 8.923274  | 1.793092  |
| O  | -1.123555 | 2.856455  | -3.376612 |
| C  | -1.1282   | 2.303952  | -4.726997 |
| H  | -2.107736 | 1.869313  | -4.937117 |
| H  | -0.927755 | 3.153083  | -5.377823 |
| H  | -0.345464 | 1.547856  | -4.813118 |



|   |           |          |           |
|---|-----------|----------|-----------|
| C | -0.83499  | 3.965055 | -0.740429 |
| H | -0.841976 | 4.637373 | -1.590701 |
| C | -0.371951 | 4.328037 | 0.474551  |
| H | -0.387083 | 3.583947 | 1.268822  |

## 12) TS1-R

|    |          |          |          |
|----|----------|----------|----------|
| C  | 2.33405  | 0.765122 | -2.52036 |
| C  | 2.106533 | 1.904282 | -1.53088 |
| O  | 2.134177 | -0.38762 | -2.1216  |
| O  | 1.427411 | 1.486447 | -0.49209 |
| C  | 3.167076 | -1.12467 | 3.815485 |
| S  | 1.864276 | 0.171905 | 3.491014 |
| F  | 3.615511 | -1.00492 | 5.069143 |
| F  | 2.646552 | -2.34628 | 3.648543 |
| F  | 4.190539 | -0.96922 | 2.969188 |
| O  | 0.886626 | 0.028608 | 4.578233 |
| O  | 2.590293 | 1.445144 | 3.385636 |
| O  | 1.291517 | -0.3092  | 2.163709 |
| C  | 5.047165 | -3.1711  | 0.617392 |
| S  | 3.714995 | -3.29176 | -0.68238 |
| F  | 6.037414 | -4.01531 | 0.304018 |
| F  | 5.53896  | -1.9304  | 0.675234 |
| F  | 4.548491 | -3.50446 | 1.812465 |
| O  | 4.276836 | -2.65904 | -1.88395 |
| O  | 3.383379 | -4.72176 | -0.74873 |
| O  | 2.590171 | -2.48992 | -0.03875 |
| Sc | 1.815381 | -0.55456 | 0.136508 |
| C  | 4.285698 | 1.281239 | -0.25396 |
| H  | 3.442219 | 1.817031 | -1.09773 |
| C  | 4.508965 | 2.476665 | 0.653347 |
| H  | 4.942027 | 3.318859 | 0.106276 |
| H  | 5.199849 | 2.176712 | 1.451803 |
| H  | 3.565302 | 2.77909  | 1.116969 |
| C  | 5.415974 | 0.884573 | -1.18937 |
| H  | 5.10148  | 0.067402 | -1.84483 |
| H  | 6.25273  | 0.523614 | -0.57731 |
| H  | 5.759616 | 1.734173 | -1.78634 |
| O  | 3.623676 | 0.276286 | 0.288143 |
| C  | 1.275416 | 5.647677 | -1.52737 |
| C  | 1.557842 | 6.19495  | -2.79664 |
| C  | 0.817151 | 6.507706 | -0.5093  |
| C  | 1.391431 | 7.556645 | -3.02989 |
| H  | 1.893597 | 5.55189  | -3.605   |

|   |          |          |          |
|---|----------|----------|----------|
| C | 0.655712 | 7.871898 | -0.74444 |
| H | 0.596454 | 6.094223 | 0.470676 |
| C | 0.941957 | 8.400403 | -2.00598 |
| H | 1.60799  | 7.964768 | -4.01344 |
| H | 0.305209 | 8.520583 | 0.053806 |
| H | 0.81236  | 9.46269  | -2.19491 |
| O | 2.788098 | 1.087261 | -3.69933 |
| C | 3.095827 | -0.00693 | -4.61771 |
| H | 3.738684 | -0.73477 | -4.12005 |
| H | 3.606017 | 0.466023 | -5.4551  |
| H | 2.162135 | -0.4717  | -4.93694 |
| C | 2.016304 | 3.288958 | -1.98904 |
| H | 2.475069 | 3.512714 | -2.946   |
| C | 1.433463 | 4.231638 | -1.21486 |
| H | 1.038935 | 3.917842 | -0.24949 |
| C | -8.49863 | 1.546776 | -0.11868 |
| C | -8.23819 | 0.297772 | -0.73373 |
| C | -6.99447 | -0.28805 | -0.6373  |
| C | -5.94376 | 0.344832 | 0.082757 |
| C | -6.19593 | 1.631077 | 0.666756 |
| C | -7.49596 | 2.19976  | 0.5614   |
| C | -4.63386 | -0.22745 | 0.217472 |
| C | -3.65673 | 0.533711 | 0.837142 |
| C | -3.86037 | 1.830972 | 1.377799 |
| C | -5.14471 | 2.337783 | 1.303439 |
| C | -4.27377 | -1.569   | -0.33206 |
| C | -4.93018 | -2.77928 | 0.079778 |
| C | -4.49319 | -4.02608 | -0.48095 |
| C | -3.39322 | -4.05343 | -1.37492 |
| C | -2.71687 | -2.90423 | -1.73493 |
| C | -3.20798 | -1.68113 | -1.20798 |
| C | -5.96297 | -2.8061  | 1.057647 |
| C | -6.56347 | -3.99241 | 1.420524 |
| C | -6.1636  | -5.21596 | 0.830113 |
| C | -5.1457  | -5.23018 | -0.09596 |
| O | -2.34751 | 0.010245 | 0.907376 |
| O | -2.5021  | -0.5023  | -1.55761 |
| P | -1.48229 | 0.025247 | -0.44249 |
| O | -0.265   | -0.83145 | -0.22506 |
| O | -1.18672 | 1.49606  | -0.91151 |
| C | -2.73027 | 2.641477 | 1.905193 |
| C | -1.47322 | -2.95169 | -2.54827 |
| C | -1.76829 | 2.116022 | 2.787275 |
| C | -0.70925 | 2.907693 | 3.233314 |

|   |          |          |          |
|---|----------|----------|----------|
| C | -0.589   | 4.234143 | 2.8066   |
| C | -1.54353 | 4.768461 | 1.937227 |
| C | -2.60208 | 3.977446 | 1.487884 |
| C | -0.43153 | -3.80897 | -2.15658 |
| C | 0.762321 | -3.85503 | -2.87908 |
| C | 0.931248 | -3.04486 | -4.00437 |
| C | -0.10251 | -2.19274 | -4.40557 |
| C | -1.29412 | -2.14114 | -3.6813  |
| H | -9.48666 | 1.991809 | -0.19759 |
| H | -9.02605 | -0.2018  | -1.29089 |
| H | -6.81062 | -1.23989 | -1.12253 |
| H | -7.67671 | 3.168686 | 1.020154 |
| H | -5.35547 | 3.317842 | 1.722216 |
| H | -3.05823 | -5.01083 | -1.7644  |
| H | -6.27538 | -1.88216 | 1.530035 |
| H | -7.34827 | -3.98926 | 2.172141 |
| H | -6.65213 | -6.14169 | 1.121503 |
| H | -4.81187 | -6.16488 | -0.5393  |
| H | -0.2215  | 1.721113 | -0.73277 |
| H | 0.017586 | 2.488834 | 3.921797 |
| H | -1.46338 | 5.798246 | 1.600336 |
| H | 1.561923 | -4.51233 | -2.55201 |
| H | 0.017474 | -1.56667 | -5.28595 |
| H | 1.864652 | -3.07243 | -4.55968 |
| H | -0.54981 | -4.42068 | -1.26631 |
| H | -2.09261 | -1.47686 | -3.99748 |
| H | -3.32539 | 4.390219 | 0.790107 |
| H | 0.239557 | 4.845665 | 3.154273 |
| H | -1.8485  | 1.090115 | 3.130746 |

### 13) Int4

|   |          |           |           |
|---|----------|-----------|-----------|
| C | 7.946639 | -1.977709 | 1.795475  |
| C | 7.082837 | -3.097246 | 1.882437  |
| C | 5.817271 | -3.05237  | 1.338349  |
| C | 5.348064 | -1.882698 | 0.678621  |
| C | 6.209271 | -0.738537 | 0.624268  |
| C | 7.51513  | -0.822848 | 1.183078  |
| C | 4.041433 | -1.788845 | 0.093411  |
| C | 3.627297 | -0.564306 | -0.407667 |
| C | 4.467627 | 0.581517  | -0.488479 |
| C | 5.749325 | 0.456432  | 0.017788  |
| C | 3.118506 | -2.957013 | 0.007378  |
| C | 3.477138 | -4.147403 | -0.714344 |

|   |           |           |           |
|---|-----------|-----------|-----------|
| C | 2.532711  | -5.223928 | -0.775204 |
| C | 1.254129  | -5.067181 | -0.18736  |
| C | 0.870435  | -3.898562 | 0.444308  |
| C | 1.84382   | -2.8652   | 0.542417  |
| C | 4.709247  | -4.297254 | -1.411275 |
| C | 5.004833  | -5.461861 | -2.087038 |
| C | 4.087237  | -6.540553 | -2.107133 |
| C | 2.874521  | -6.41861  | -1.468285 |
| O | 2.309055  | -0.447704 | -0.86972  |
| O | 1.482333  | -1.674244 | 1.192949  |
| P | 1.132727  | -0.386432 | 0.262591  |
| O | -0.149341 | -0.667248 | -0.543576 |
| O | 1.141896  | 0.859161  | 1.100609  |
| C | 4.022509  | 1.857442  | -1.10618  |
| C | -0.529567 | -3.726422 | 0.910212  |
| C | 3.306126  | 1.882447  | -2.317526 |
| C | 2.98129   | 3.095901  | -2.92419  |
| C | 3.362666  | 4.30543   | -2.335178 |
| C | 4.069449  | 4.292437  | -1.131075 |
| C | 4.389389  | 3.080586  | -0.519516 |
| C | -1.577445 | -4.088141 | 0.044664  |
| C | -2.908544 | -3.952078 | 0.437902  |
| C | -3.215313 | -3.45298  | 1.705868  |
| C | -2.181543 | -3.09798  | 2.576347  |
| C | -0.849214 | -3.223498 | 2.181761  |
| H | 8.944408  | -2.030982 | 2.222442  |
| H | 7.420322  | -3.998796 | 2.386646  |
| H | 5.164611  | -3.914386 | 1.421479  |
| H | 8.162631  | 0.048605  | 1.124104  |
| H | 6.433049  | 1.297911  | -0.050033 |
| H | 0.545333  | -5.88732  | -0.261082 |
| H | 5.421868  | -3.480943 | -1.421535 |
| H | 5.950161  | -5.550829 | -2.615691 |
| H | 4.337362  | -7.453913 | -2.640011 |
| H | 2.149044  | -7.228085 | -1.494504 |
| H | -0.128747 | 1.866766  | 0.461155  |
| H | 2.442164  | 3.09594   | -3.867029 |
| H | 4.354879  | 5.2248    | -0.654046 |
| H | -3.701268 | -4.214979 | -0.255316 |
| H | -2.411145 | -2.697092 | 3.557721  |
| H | -4.25053  | -3.323877 | 2.005921  |
| H | -1.34526  | -4.451674 | -0.952582 |
| H | -0.055678 | -2.931729 | 2.861555  |
| H | 4.917572  | 3.082539  | 0.429557  |

|    |           |           |           |
|----|-----------|-----------|-----------|
| H  | 3.106241  | 5.249639  | -2.80845  |
| H  | 3.024834  | 0.950964  | -2.79711  |
| C  | -0.774713 | 2.434636  | -2.267509 |
| C  | -0.882331 | 3.142738  | -0.919039 |
| O  | -1.173137 | 1.265621  | -2.383226 |
| O  | -1.015259 | 2.122144  | 0.067251  |
| C  | -4.055149 | 0.385272  | 3.263625  |
| S  | -2.257861 | 0.625888  | 2.842532  |
| F  | -4.268964 | 0.780287  | 4.523093  |
| F  | -4.406432 | -0.89836  | 3.142244  |
| F  | -4.813595 | 1.123296  | 2.441311  |
| O  | -1.504222 | -0.170798 | 3.81715   |
| O  | -2.061229 | 2.080975  | 2.847808  |
| O  | -2.227587 | 0.004881  | 1.45123   |
| C  | -5.723308 | -1.532719 | -0.572118 |
| S  | -4.605816 | -1.426512 | -2.076795 |
| F  | -6.958793 | -1.170769 | -0.933256 |
| F  | -5.296081 | -0.713718 | 0.394153  |
| F  | -5.755274 | -2.782424 | -0.102194 |
| O  | -5.075431 | -0.242431 | -2.812316 |
| O  | -4.702022 | -2.735253 | -2.730414 |
| O  | -3.232139 | -1.211855 | -1.445644 |
| Sc | -1.989148 | 0.213538  | -0.595859 |
| C  | -4.525356 | 2.171898  | -1.309665 |
| H  | -1.861752 | 3.643453  | -0.964951 |
| C  | -5.871646 | 2.326251  | -0.684916 |
| H  | -6.286901 | 3.317917  | -0.890843 |
| H  | -6.532932 | 1.589655  | -1.162461 |
| H  | -5.832552 | 2.12816   | 0.38696   |
| C  | -4.267275 | 2.787041  | -2.644976 |
| H  | -3.428665 | 2.307264  | -3.150004 |
| H  | -5.165623 | 2.753302  | -3.267898 |
| H  | -4.029393 | 3.847507  | -2.475994 |
| O  | -3.63688  | 1.551243  | -0.702013 |
| C  | 1.735388  | 5.322892  | 0.957211  |
| C  | 1.885429  | 6.533071  | 0.256385  |
| C  | 2.603157  | 5.055335  | 2.030633  |
| C  | 2.89339   | 7.432441  | 0.60078   |
| H  | 1.205754  | 6.772617  | -0.556701 |
| C  | 3.616869  | 5.951458  | 2.370268  |
| H  | 2.493113  | 4.124742  | 2.58256   |
| C  | 3.768599  | 7.142255  | 1.653592  |
| H  | 2.995116  | 8.364099  | 0.050001  |
| H  | 4.286888  | 5.721094  | 3.194574  |

|   |           |          |           |
|---|-----------|----------|-----------|
| H | 4.554902  | 7.843924 | 1.91934   |
| O | -0.340506 | 3.155769 | -3.259933 |
| C | -0.309487 | 2.534289 | -4.580185 |
| H | -1.324624 | 2.259715 | -4.874437 |
| H | 0.094358  | 3.299152 | -5.240869 |
| H | 0.335929  | 1.654497 | -4.553863 |
| C | 0.179665  | 4.161492 | -0.61739  |
| H | 0.450772  | 4.799055 | -1.453374 |
| C | 0.727517  | 4.315421 | 0.59567   |
| H | 0.443637  | 3.640105 | 1.400501  |

#### 14) TS2-S

|   |           |          |           |
|---|-----------|----------|-----------|
| C | -0.586541 | 5.751861 | 2.135387  |
| C | -1.005655 | 7.01086  | 2.561945  |
| C | -0.259029 | 8.144893 | 2.23041   |
| C | 0.910943  | 8.011552 | 1.472487  |
| C | 1.336591  | 6.753457 | 1.054423  |
| H | -1.176294 | 4.871688 | 2.376691  |
| H | -1.918901 | 7.108434 | 3.142636  |
| H | -0.5888   | 9.128863 | 2.553127  |
| H | 1.487266  | 8.892661 | 1.203165  |
| H | 2.234658  | 6.664688 | 0.449994  |
| C | 2.474786  | 2.479228 | 0.153813  |
| C | 3.803673  | 1.855299 | 0.59935   |
| O | 1.507454  | 1.595391 | 0.192847  |
| O | 3.799437  | 0.660654 | 0.921361  |
| O | 4.856472  | 2.618039 | 0.586299  |
| C | 6.127671  | 1.997769 | 0.964626  |
| H | 6.863611  | 2.794633 | 0.873186  |
| H | 6.061373  | 1.639957 | 1.994008  |
| H | 6.338181  | 1.176057 | 0.278687  |
| O | 2.183845  | 1.155788 | -2.547873 |
| C | 2.610079  | 2.417308 | -2.450638 |
| H | 2.78641   | 2.609836 | -1.121382 |
| C | 4.025674  | 2.60529  | -2.930248 |
| H | 4.659658  | 1.782087 | -2.592546 |
| H | 4.012401  | 2.609487 | -4.028868 |
| H | 4.429789  | 3.559825 | -2.583929 |
| C | 1.591842  | 3.498409 | -2.692946 |
| H | 1.284781  | 3.454904 | -3.745809 |
| H | 0.710383  | 3.331049 | -2.068652 |
| H | 2.007174  | 4.486181 | -2.481844 |
| H | 1.184521  | 1.067422 | -2.492327 |

|    |           |           |           |
|----|-----------|-----------|-----------|
| Sc | 1.926644  | -0.419627 | 0.358065  |
| C  | 5.433961  | -2.472591 | 0.00065   |
| S  | 4.632436  | -1.574721 | -1.421651 |
| F  | 6.701183  | -2.755817 | -0.317483 |
| F  | 5.42081   | -1.711165 | 1.100527  |
| F  | 4.77927   | -3.611761 | 0.254736  |
| O  | 5.333848  | -0.285172 | -1.510526 |
| O  | 4.730549  | -2.487028 | -2.565859 |
| O  | 3.199798  | -1.452128 | -0.919165 |
| C  | -0.361782 | -2.237223 | 3.039171  |
| S  | 1.409466  | -1.63937  | 2.909148  |
| F  | -0.838771 | -1.918995 | 4.241492  |
| F  | -1.106901 | -1.667575 | 2.096944  |
| F  | -0.372841 | -3.563295 | 2.886725  |
| O  | 1.322063  | -0.172465 | 2.5638    |
| O  | 2.047844  | -2.005428 | 4.168539  |
| O  | 1.939024  | -2.280987 | 1.647581  |
| C  | 0.595604  | 5.601126  | 1.385375  |
| C  | 0.989425  | 4.258484  | 0.963442  |
| H  | 0.215233  | 3.495118  | 1.018395  |
| C  | 2.216046  | 3.875899  | 0.553261  |
| H  | 3.061196  | 4.555526  | 0.503845  |
| C  | -8.237705 | -0.504811 | -1.756578 |
| C  | -7.589224 | -1.747344 | -1.550725 |
| C  | -6.257267 | -1.797078 | -1.19995  |
| C  | -5.498865 | -0.603517 | -1.038501 |
| C  | -6.14877  | 0.648832  | -1.280846 |
| C  | -7.528152 | 0.667607  | -1.628048 |
| C  | -4.109127 | -0.605843 | -0.673669 |
| C  | -3.409439 | 0.593405  | -0.707954 |
| C  | -4.039391 | 1.849638  | -0.940153 |
| C  | -5.398925 | 1.84638   | -1.19247  |
| C  | -3.426966 | -1.870985 | -0.278368 |
| C  | -3.868028 | -2.6616   | 0.838022  |
| C  | -3.172588 | -3.879722 | 1.132577  |
| C  | -2.060033 | -4.264091 | 0.343188  |
| C  | -1.586086 | -3.477651 | -0.688332 |
| C  | -2.299303 | -2.278368 | -0.964871 |
| C  | -4.926412 | -2.264511 | 1.701003  |
| C  | -5.291614 | -3.043511 | 2.778484  |
| C  | -4.620976 | -4.260414 | 3.05128   |
| C  | -3.580809 | -4.665254 | 2.245302  |
| O  | -2.042395 | 0.603505  | -0.404374 |
| O  | -1.789049 | -1.41545  | -1.950102 |

|   |           |           |           |
|---|-----------|-----------|-----------|
| P | -0.947094 | -0.157534 | -1.351864 |
| O | 0.078066  | -0.721379 | -0.353739 |
| O | -0.443062 | 0.68122   | -2.488483 |
| C | -3.322948 | 3.153995  | -0.883867 |
| C | -0.345309 | -3.83738  | -1.418857 |
| C | -3.820835 | 4.164608  | -0.042343 |
| C | -3.248706 | 5.437107  | -0.03719  |
| C | -2.17363  | 5.723512  | -0.881356 |
| C | -1.669328 | 4.725245  | -1.718245 |
| C | -2.229488 | 3.444755  | -1.715232 |
| C | 0.783669  | -4.256909 | -0.694277 |
| C | 1.965072  | -4.598013 | -1.35352  |
| C | 2.035685  | -4.531582 | -2.747252 |
| C | 0.917745  | -4.117456 | -3.477052 |
| C | -0.262847 | -3.769377 | -2.819883 |
| H | -9.289749 | -0.482567 | -2.027604 |
| H | -8.146264 | -2.671832 | -1.677461 |
| H | -5.776183 | -2.758248 | -1.05824  |
| H | -8.007145 | 1.628425  | -1.800241 |
| H | -5.905105 | 2.791423  | -1.369691 |
| H | -1.549961 | -5.193224 | 0.580966  |
| H | -5.442518 | -1.328933 | 1.517913  |
| H | -6.098152 | -2.716394 | 3.429252  |
| H | -4.921117 | -4.864107 | 3.903484  |
| H | -3.043683 | -5.587089 | 2.454446  |
| H | -3.640021 | 6.202326  | 0.627677  |
| H | -0.843671 | 4.950092  | -2.387093 |
| H | 2.838338  | -4.887719 | -0.777041 |
| H | 0.963631  | -4.06566  | -4.561929 |
| H | 2.959482  | -4.785163 | -3.259158 |
| H | 0.744432  | -4.273393 | 0.390204  |
| H | -1.127239 | -3.451318 | -3.394148 |
| H | -1.836733 | 2.679959  | -2.376698 |
| H | -1.725999 | 6.713467  | -0.879996 |
| H | -4.660597 | 3.94544   | 0.611792  |

15) TS2-R

|   |          |          |          |
|---|----------|----------|----------|
| C | -0.79928 | 4.817505 | -3.32125 |
| C | -0.69781 | 5.99804  | -4.05551 |
| C | -1.77529 | 6.431309 | -4.83236 |
| C | -2.95443 | 5.675878 | -4.87166 |
| C | -3.05882 | 4.497235 | -4.13934 |
| H | 0.037062 | 4.483283 | -2.7136  |



|    |          |          |          |
|----|----------|----------|----------|
| H  | 0.220146 | 6.578475 | -4.01999 |
| H  | -1.70007 | 7.351875 | -5.40497 |
| H  | -3.79327 | 6.010149 | -5.47632 |
| H  | -3.98062 | 3.924243 | -4.17984 |
| C  | -2.931   | 0.780291 | -1.56338 |
| C  | -4.17299 | 0.312971 | -0.79954 |
| O  | -1.85006 | 0.603484 | -0.8471  |
| O  | -4.01983 | -0.07261 | 0.365503 |
| O  | -5.30618 | 0.335815 | -1.4373  |
| C  | -6.48278 | -0.15684 | -0.71937 |
| H  | -7.28234 | -0.147   | -1.45805 |
| H  | -6.70324 | 0.519605 | 0.109022 |
| H  | -6.28409 | -1.16673 | -0.35825 |
| O  | -1.74776 | -1.94084 | -2.18123 |
| C  | -2.39011 | -1.24119 | -3.1218  |
| H  | -2.92402 | -0.21031 | -2.46744 |
| C  | -3.63691 | -1.93037 | -3.61818 |
| H  | -4.19978 | -2.35306 | -2.78301 |
| H  | -3.3307  | -2.7488  | -4.28383 |
| H  | -4.26544 | -1.23826 | -4.18413 |
| C  | -1.5384  | -0.4854  | -4.11273 |
| H  | -0.98506 | -1.22176 | -4.70985 |
| H  | -0.81315 | 0.153616 | -3.60045 |
| H  | -2.15626 | 0.121831 | -4.77814 |
| H  | -0.83023 | -1.57174 | -1.99828 |
| Sc | -1.88114 | -0.29705 | 0.988088 |
| C  | -4.36274 | -3.16205 | 2.253693 |
| S  | -3.44984 | -3.33013 | 0.63635  |
| F  | -5.32436 | -4.08865 | 2.315133 |
| F  | -4.91856 | -1.94991 | 2.358899 |
| F  | -3.5121  | -3.34051 | 3.270688 |
| O  | -4.40541 | -2.91498 | -0.40017 |
| O  | -2.96916 | -4.71649 | 0.609802 |
| O  | -2.30283 | -2.34315 | 0.845519 |
| C  | -1.00539 | 2.071835 | 4.082173 |
| S  | -2.52653 | 1.411316 | 3.225702 |
| F  | -0.90326 | 3.377733 | 3.838869 |
| F  | 0.075452 | 1.444058 | 3.612754 |
| F  | -1.11078 | 1.86122  | 5.392996 |
| O  | -2.32347 | 1.791651 | 1.778118 |
| O  | -3.67633 | 1.974944 | 3.922839 |
| O  | -2.35343 | -0.08984 | 3.240705 |
| C  | -1.98023 | 4.04844  | -3.34881 |
| C  | -2.0246  | 2.826997 | -2.55132 |

|   |          |          |          |
|---|----------|----------|----------|
| H | -1.12052 | 2.60231  | -1.98918 |
| C | -3.06007 | 1.969839 | -2.42086 |
| H | -4.00816 | 2.093966 | -2.93407 |
| C | 7.784327 | -1.84106 | -2.7379  |
| C | 7.720805 | -0.66715 | -1.94952 |
| C | 6.620553 | -0.40794 | -1.16016 |
| C | 5.522252 | -1.31056 | -1.11346 |
| C | 5.566953 | -2.47459 | -1.95341 |
| C | 6.724976 | -2.7202  | -2.74241 |
| C | 4.353048 | -1.09045 | -0.30369 |
| C | 3.303753 | -1.98019 | -0.42967 |
| C | 3.298357 | -3.10821 | -1.29656 |
| C | 4.447255 | -3.34439 | -2.02367 |
| C | 4.203879 | 0.099599 | 0.587818 |
| C | 5.157196 | 0.386852 | 1.624748 |
| C | 5.067671 | 1.633472 | 2.32573  |
| C | 4.033466 | 2.544845 | 1.997326 |
| C | 3.051999 | 2.237233 | 1.074851 |
| C | 3.137336 | 0.975259 | 0.418384 |
| C | 6.174996 | -0.53015 | 2.009132 |
| C | 7.069306 | -0.21722 | 3.010367 |
| C | 6.998447 | 1.029304 | 3.679213 |
| C | 6.014462 | 1.931934 | 3.34439  |
| O | 2.14465  | -1.71841 | 0.309047 |
| O | 2.138993 | 0.684763 | -0.51641 |
| P | 1.155086 | -0.60817 | -0.34674 |
| O | 0.136453 | -0.39336 | 0.78715  |
| O | 0.659738 | -0.94442 | -1.72007 |
| C | 2.05598  | -3.90355 | -1.47691 |
| C | 2.011955 | 3.244937 | 0.726187 |
| C | 1.326486 | -4.39033 | -0.37931 |
| C | 0.101771 | -5.02924 | -0.56837 |
| C | -0.41534 | -5.19269 | -1.85723 |
| C | 0.314445 | -4.73634 | -2.95793 |
| C | 1.542184 | -4.0982  | -2.76942 |
| C | 0.638331 | 2.960537 | 0.784491 |
| C | -0.30381 | 3.944373 | 0.479632 |
| C | 0.109619 | 5.225601 | 0.103017 |
| C | 1.474028 | 5.519715 | 0.040725 |
| C | 2.417052 | 4.537863 | 0.352136 |
| H | 8.661984 | -2.0366  | -3.34798 |
| H | 8.545258 | 0.040649 | -1.96978 |
| H | 6.588579 | 0.502743 | -0.5739  |
| H | 6.749693 | -3.61354 | -3.36167 |

|   |          |          |          |
|---|----------|----------|----------|
| H | 4.491573 | -4.20138 | -2.69059 |
| H | 3.997405 | 3.502008 | 2.510622 |
| H | 6.238022 | -1.4928  | 1.513917 |
| H | 7.833277 | -0.93647 | 3.293133 |
| H | 7.713604 | 1.263916 | 4.462955 |
| H | 5.937548 | 2.885547 | 3.861077 |
| H | -0.45997 | -5.38321 | 0.290097 |
| H | -0.07959 | -4.85844 | -3.9637  |
| H | -1.36033 | 3.705296 | 0.540356 |
| H | 1.806697 | 6.511405 | -0.25523 |
| H | -0.62612 | 5.985987 | -0.14474 |
| H | 0.307543 | 1.975413 | 1.083683 |
| H | 3.47765  | 4.767377 | 0.292395 |
| H | 2.087555 | -3.70646 | -3.62389 |
| H | -1.38255 | -5.66751 | -1.9984  |
| H | 1.713674 | -4.25352 | 0.625303 |

16) Prod: 3a

|   |          |          |          |
|---|----------|----------|----------|
| H | 1.845716 | -2.2847  | 0.575921 |
| C | 2.861906 | -0.10887 | 0.133565 |
| C | 1.870169 | -0.87508 | -0.75068 |
| O | 3.275213 | -0.53079 | 1.197575 |
| O | 1.864847 | -2.24198 | -0.39779 |
| H | 2.229876 | -0.81218 | -1.78569 |
| C | -1.93229 | -0.23637 | -0.07741 |
| C | -2.23414 | 1.111739 | -0.35513 |
| C | -2.97716 | -1.07086 | 0.361225 |
| C | -3.52986 | 1.5989   | -0.2009  |
| H | -1.45187 | 1.785493 | -0.69335 |
| C | -4.27515 | -0.58291 | 0.516023 |
| H | -2.7642  | -2.11451 | 0.581879 |
| C | -4.55803 | 0.75524  | 0.235103 |
| H | -3.74019 | 2.642563 | -0.42112 |
| H | -5.06445 | -1.2487  | 0.856015 |
| H | -5.56772 | 1.139517 | 0.354123 |
| O | 3.172717 | 1.08016  | -0.38912 |
| C | 4.045798 | 1.920149 | 0.404236 |
| H | 5.015552 | 1.433995 | 0.540488 |
| H | 4.157673 | 2.841833 | -0.16708 |
| H | 3.591893 | 2.125223 | 1.377431 |
| C | 0.520699 | -0.19155 | -0.64689 |
| H | 0.519983 | 0.855997 | -0.93984 |
| C | -0.58673 | -0.81325 | -0.22049 |

|   |          |          |          |
|---|----------|----------|----------|
| H | -0.50581 | -1.86656 | 0.043907 |
|---|----------|----------|----------|

17) CH<sub>3</sub>COCH<sub>3</sub>

|   |          |          |          |
|---|----------|----------|----------|
| C | 0.000019 | 0.180458 | -0.00017 |
| C | -1.28584 | -0.61413 | -0.00218 |
| H | -2.14577 | 0.048089 | -0.13041 |
| H | -1.27158 | -1.36977 | -0.79716 |
| H | -1.38145 | -1.15489 | 0.948773 |
| C | 1.285902 | -0.61404 | 0.002169 |
| H | 1.271915 | -1.36842 | 0.798386 |
| H | 1.381014 | -1.15641 | -0.9479  |
| H | 2.145906 | 0.048326 | 0.12918  |
| O | -6.4E-05 | 1.404914 | 0.00003  |

18) Int5

|   |           |           |           |
|---|-----------|-----------|-----------|
| C | 6.004447  | 1.039199  | 0.888319  |
| C | 7.382441  | 0.956471  | 1.049469  |
| C | 8.160099  | 0.33661   | 0.065242  |
| C | 7.558732  | -0.201084 | -1.082658 |
| C | 6.18331   | -0.129566 | -1.246409 |
| H | 5.392003  | 1.518295  | 1.647449  |
| H | 7.852883  | 1.372535  | 1.935248  |
| H | 9.23772   | 0.272941  | 0.188632  |
| H | 8.170962  | -0.674537 | -1.844456 |
| H | 5.726831  | -0.543115 | -2.139755 |
| C | 1.748037  | 0.127242  | -1.245703 |
| C | 0.842331  | -0.634234 | -2.20217  |
| O | 1.091293  | 0.81559   | -0.414732 |
| O | -0.383464 | -0.504264 | -2.046101 |
| O | 1.399452  | -1.363416 | -3.112717 |
| C | 0.51413   | -2.135091 | -3.987713 |
| H | 1.184797  | -2.71726  | -4.616367 |
| H | -0.118523 | -2.777175 | -3.372178 |
| H | -0.089586 | -1.44508  | -4.58059  |
| C | -4.22522  | -2.075964 | 0.616491  |
| S | -3.370672 | -1.744112 | -1.003701 |
| F | -4.748365 | -3.304926 | 0.592127  |
| F | -3.352357 | -1.988193 | 1.623915  |
| F | -5.201225 | -1.181937 | 0.802593  |
| O | -2.300953 | -2.743023 | -1.107308 |
| O | -4.426428 | -1.73962  | -2.02141  |
| O | -2.847584 | -0.323485 | -0.742287 |

|    |           |           |           |
|----|-----------|-----------|-----------|
| C  | -2.632565 | 4.237901  | 0.368621  |
| S  | -0.969453 | 3.450422  | 0.072117  |
| F  | -2.851261 | 5.1688    | -0.556845 |
| F  | -3.578022 | 3.297586  | 0.296046  |
| F  | -2.640966 | 4.790201  | 1.580036  |
| O  | -1.126572 | 2.70426   | -1.231295 |
| O  | 0.02492   | 4.51326   | 0.137155  |
| O  | -0.901437 | 2.359901  | 1.12368   |
| C  | 1.477268  | -1.679838 | 2.364548  |
| S  | 0.245866  | -2.22422  | 1.079474  |
| F  | 2.320305  | -2.682931 | 2.62091   |
| F  | 2.170304  | -0.627437 | 1.913375  |
| F  | 0.839849  | -1.33581  | 3.485712  |
| O  | 1.033103  | -2.442376 | -0.145947 |
| O  | -0.470687 | -3.358326 | 1.662642  |
| O  | -0.624356 | -0.965775 | 0.998568  |
| C  | 5.379998  | 0.491206  | -0.257795 |
| C  | 3.949384  | 0.57915   | -0.356336 |
| H  | 3.450208  | 1.142375  | 0.429825  |
| C  | 3.152224  | 0.002069  | -1.316014 |
| H  | 3.556305  | -0.612161 | -2.111682 |
| Sc | -1.056467 | 0.591683  | -0.279644 |

19) TS-3

|   |          |          |          |
|---|----------|----------|----------|
| C | -5.76095 | 0.706533 | -1.12599 |
| C | -7.08711 | 0.772283 | -1.55024 |
| C | -7.77895 | -0.4012  | -1.86118 |
| C | -7.13768 | -1.64099 | -1.74326 |
| C | -5.81336 | -1.70935 | -1.32296 |
| H | -5.2219  | 1.619385 | -0.88409 |
| H | -7.58001 | 1.73666  | -1.63767 |
| H | -8.81339 | -0.35391 | -2.19078 |
| H | -7.67599 | -2.55523 | -1.97852 |
| H | -5.33342 | -2.67906 | -1.22979 |
| C | -1.48521 | -1.44748 | -0.07593 |
| C | -0.42194 | -2.27536 | -0.8037  |
| O | -1.01184 | -0.26459 | 0.239029 |
| O | 0.620235 | -1.69377 | -1.13799 |
| O | -0.67805 | -3.52845 | -1.01707 |
| C | 0.358655 | -4.3149  | -1.69095 |
| H | -0.01083 | -5.33823 | -1.66615 |
| H | 0.463587 | -3.95638 | -2.71675 |
| H | 1.295333 | -4.21317 | -1.14228 |

|    |          |          |          |
|----|----------|----------|----------|
| O  | -0.41642 | -1.47163 | 2.747961 |
| C  | -1.44278 | -2.2578  | 2.38851  |
| H  | -1.50653 | -2.13132 | 1.067096 |
| C  | -1.11984 | -3.72526 | 2.506596 |
| H  | -0.12115 | -3.93151 | 2.115659 |
| H  | -1.14356 | -3.99421 | 3.571432 |
| H  | -1.86324 | -4.32801 | 1.979121 |
| C  | -2.82699 | -1.78476 | 2.753328 |
| H  | -2.91927 | -1.82159 | 3.846329 |
| H  | -2.9881  | -0.75133 | 2.428787 |
| H  | -3.59102 | -2.42785 | 2.311167 |
| H  | -0.68538 | -0.5233  | 2.846843 |
| Sc | 0.902599 | 0.293015 | -0.20302 |
| C  | 4.113547 | -2.20674 | -0.16779 |
| S  | 2.921989 | -2.06209 | 1.25837  |
| F  | 4.879565 | -3.28625 | 0.017371 |
| F  | 3.447632 | -2.33568 | -1.3196  |
| F  | 4.886311 | -1.11803 | -0.22687 |
| O  | 1.983156 | -3.1806  | 1.095841 |
| O  | 3.751911 | -2.0217  | 2.466072 |
| O  | 2.286011 | -0.69763 | 0.981347 |
| C  | 0.046864 | 3.666696 | 2.945442 |
| S  | -0.67786 | 2.216517 | 2.034239 |
| F  | -0.84936 | 4.124325 | 3.822711 |
| F  | 1.149738 | 3.286186 | 3.592814 |
| F  | 0.351831 | 4.631678 | 2.075203 |
| O  | -0.96566 | 1.212899 | 3.083264 |
| O  | -1.81107 | 2.732631 | 1.260336 |
| O  | 0.525334 | 1.831966 | 1.176571 |
| C  | 1.978992 | 3.071449 | -2.78851 |
| S  | 1.576662 | 1.250569 | -2.80793 |
| F  | 1.137155 | 3.717029 | -3.59172 |
| F  | 1.848725 | 3.526754 | -1.53912 |
| F  | 3.231117 | 3.248104 | -3.2036  |
| O  | 0.202847 | 1.16985  | -2.17849 |
| O  | 1.726732 | 0.789103 | -4.1812  |
| O  | 2.495554 | 0.662399 | -1.75866 |
| C  | -5.09967 | -0.53268 | -1.01085 |
| C  | -3.70665 | -0.53621 | -0.57637 |
| H  | -3.30239 | 0.428725 | -0.27433 |
| C  | -2.87264 | -1.59821 | -0.53757 |
| H  | -3.17015 | -2.60023 | -0.82991 |

20) TS-4

|   |          |          |          |
|---|----------|----------|----------|
| C | 7.608333 | 0.090586 | -1.19651 |
| C | 6.799583 | 1.10903  | -1.7572  |
| C | 5.484214 | 1.255107 | -1.3728  |
| C | 4.907781 | 0.387438 | -0.40472 |
| C | 5.716361 | -0.66908 | 0.132156 |
| C | 7.07455  | -0.78166 | -0.27549 |
| C | 3.542696 | 0.499777 | 0.028704 |
| C | 3.057622 | -0.47716 | 0.878488 |
| C | 3.82548  | -1.53905 | 1.421717 |
| C | 5.153621 | -1.59697 | 1.044145 |
| C | 2.644619 | 1.601312 | -0.4287  |
| C | 2.951175 | 2.983649 | -0.1806  |
| C | 2.048274 | 3.987165 | -0.66519 |
| C | 0.855611 | 3.603218 | -1.32679 |
| C | 0.515726 | 2.276743 | -1.51536 |
| C | 1.445343 | 1.307885 | -1.05277 |
| C | 4.091087 | 3.40312  | 0.559547 |
| C | 4.345386 | 4.741895 | 0.76596  |
| C | 3.476297 | 5.73265  | 0.247777 |
| C | 2.348552 | 5.360471 | -0.44739 |
| O | 1.676986 | -0.44568 | 1.218027 |
| O | 1.097984 | -0.05847 | -1.22455 |
| P | 0.656272 | -0.87141 | 0.075354 |
| O | -0.74407 | -0.54393 | 0.566109 |
| O | 0.85927  | -2.37307 | -0.30827 |
| C | 3.226885 | -2.55588 | 2.324146 |
| C | -0.78517 | 1.898846 | -2.12668 |
| C | 2.442038 | -2.18478 | 3.429868 |
| C | 1.901396 | -3.15646 | 4.272016 |
| C | 2.132838 | -4.51286 | 4.022762 |
| C | 2.913169 | -4.8913  | 2.927409 |
| C | 3.456042 | -3.92051 | 2.083744 |
| C | -1.96566 | 2.521774 | -1.68062 |
| C | -3.20604 | 2.18089  | -2.22923 |
| C | -3.2801  | 1.234223 | -3.25704 |
| C | -2.10966 | 0.628137 | -3.72293 |
| C | -0.87332 | 0.951879 | -3.16086 |
| H | 8.645781 | -0.00579 | -1.50434 |
| H | 7.219583 | 1.780148 | -2.50132 |
| H | 4.878496 | 2.035066 | -1.81969 |
| H | 7.679378 | -1.57831 | 0.150046 |
| H | 5.785503 | -2.38287 | 1.44819  |
| H | 0.184138 | 4.379108 | -1.68369 |
| H | 4.763917 | 2.66122  | 0.973328 |

|    |          |          |          |
|----|----------|----------|----------|
| H  | 5.220601 | 5.039901 | 1.336662 |
| H  | 3.696249 | 6.783694 | 0.41278  |
| H  | 1.661254 | 6.108959 | -0.83333 |
| H  | 1.303481 | -2.85347 | 5.127739 |
| H  | 3.095239 | -5.94325 | 2.72379  |
| H  | -4.10683 | 2.662519 | -1.85936 |
| H  | -2.15793 | -0.10599 | -4.52084 |
| H  | -4.24153 | 0.970182 | -3.6888  |
| H  | -1.91517 | 3.254093 | -0.88033 |
| H  | 0.027392 | 0.471635 | -3.52899 |
| H  | 4.047577 | -4.2189  | 1.222564 |
| H  | 1.708513 | -5.26842 | 4.678709 |
| H  | 2.267618 | -1.13344 | 3.636873 |
| C  | -2.13487 | -3.01586 | -3.00919 |
| S  | -2.71104 | -3.1702  | -1.24275 |
| F  | -1.87319 | -4.23149 | -3.48232 |
| F  | -1.02566 | -2.27197 | -3.04321 |
| F  | -3.08705 | -2.44    | -3.74032 |
| O  | -1.52844 | -3.62721 | -0.47871 |
| O  | -3.89216 | -4.02556 | -1.2337  |
| O  | -3.04857 | -1.70109 | -0.93994 |
| C  | -5.00006 | 1.634788 | 3.096923 |
| S  | -4.35443 | 1.951447 | 1.373618 |
| F  | -4.50431 | 0.476272 | 3.5309   |
| F  | -6.32598 | 1.575487 | 3.052392 |
| F  | -4.6066  | 2.623823 | 3.890822 |
| O  | -4.73564 | 0.708296 | 0.582854 |
| O  | -2.84849 | 1.807759 | 1.478618 |
| O  | -4.89469 | 3.226384 | 0.931154 |
| Sc | -2.71249 | -0.14506 | 0.338542 |
| H  | 0.011443 | -2.90137 | -0.38264 |



## VI. Non-linear Effect

*ee* Value of the product **3a** was found to correlate linearly with *ee* value of the chiral phosphoric acid **1d**, suggesting that a higher ligand/metal complex is unlikely to be the catalytically active species (Figure S4).

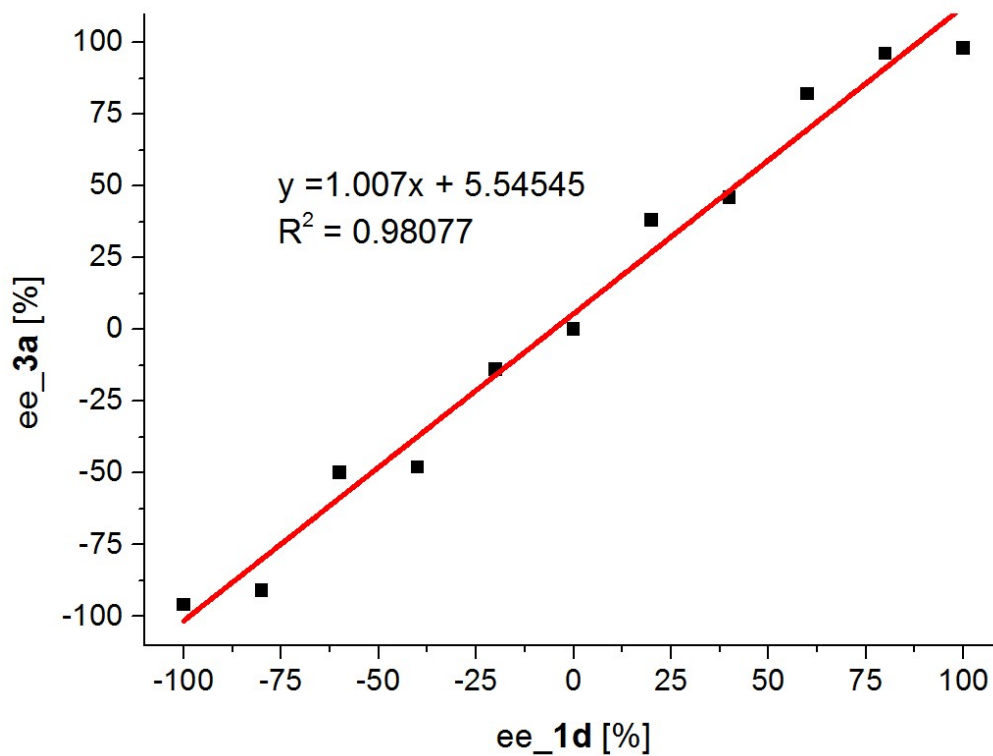

**Figure S4.** Nonlinear effect in enantioselective Meerwein-Ponndorf-Verley Reduction of  $\beta,\gamma$ -unsaturated  $\alpha$ -ketoester **3a** with *i*PrOH

## VII. Control Experiments

### A) Lewis acid catalysis with chiral basic ligands

**Scheme 5, entries 1-2 and 4-5:** To a 25 mL flask,  $\beta,\gamma$ -unsaturated  $\alpha$ -keto ester **2a** (0.1 mmol), Sc(OTf)<sub>3</sub> (0.01 mmol, 4.92 mg), Ligands (0.005-0.01 mmol) were dissolved in solvent *i*-PrOH (1 mL) under nitrogen atmosphere at room temperature. The reaction mixture was stirred for 20 h. Purification of mixture by column chromatography on silica gel (PE/EA = 20:1 to 10:1, v/v) gave the desired products **3a**.

**Scheme 5, entry 3:** To a 25 mL flask,  $\beta,\gamma$ -unsaturated  $\alpha$ -keto ester **2a** (0.1 mmol), Sc(OTf)<sub>3</sub> (0.01 mmol, 4.92 mg), NO-1 (0.01 mmol, 6.52 mg), Al(*O**i*Pr)<sub>3</sub> (0.01 mmol, 2.04 mg), and 3 Å MS (25 mg) were dissolved in solvent *i*-PrOH (1 mL) under nitrogen atmosphere at room temperature. The reaction mixture was stirred for 20 h. Purification of mixture by column chromatography on silica gel (PE/EA = 20:1 to 10:1, v/v) gave the desired products **3a**.

## B) Lewis acid catalysis with chiral acid ligand

**Table S9.** Binary acid ratio effect in reaction activity and enantioselectivity <sup>a</sup>

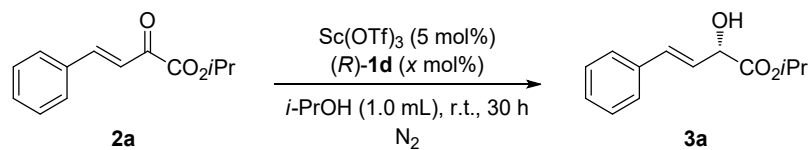

| Entry           | X (5/x) | Yield (%) <sup>b</sup> | ee (%) <sup>c</sup> |
|-----------------|---------|------------------------|---------------------|
| 1               | 1       | 97                     | 98                  |
| 2               | 2       | 97                     | 96                  |
| 3               | 4       | 98                     | 96                  |
| 4               | 5       | 98                     | 98                  |
| 5 <sup>d</sup>  | 10      | 98                     | 96                  |
| 6 <sup>d</sup>  | 20      | 94                     | 94                  |
| 7 <sup>d</sup>  | 30      | 72                     | 62                  |
| 8 <sup>e</sup>  | 40      | 53                     | 54                  |
| 9 <sup>e</sup>  | 50      | 30                     | 46                  |
| 10 <sup>e</sup> | 60      | 31                     | 24                  |
| 11 <sup>e</sup> | 80      | trace                  | 22                  |
| 12 <sup>e</sup> | 100     | NR                     | -                   |

<sup>a</sup> Reaction conditions: **2a** (0.1 mmol) and Sc(OTf)<sub>3</sub> (5 mol %), (*R*)-**1d** (*x* mol%) in *i*-PrOH (1.0 mL) under N<sub>2</sub> at room temperature for 30 h. <sup>b</sup> Isolated yield. <sup>c</sup> Determined by HPLC analysis on a chiral stationary phase. <sup>d</sup> **2a** (0.5 mmol) in *i*-PrOH (5.0 mL). <sup>e</sup> **2a** (1.0 mmol) in *i*-PrOH (10.0 mL). NR = No Reaction.

## VIII. NMR Spectrum

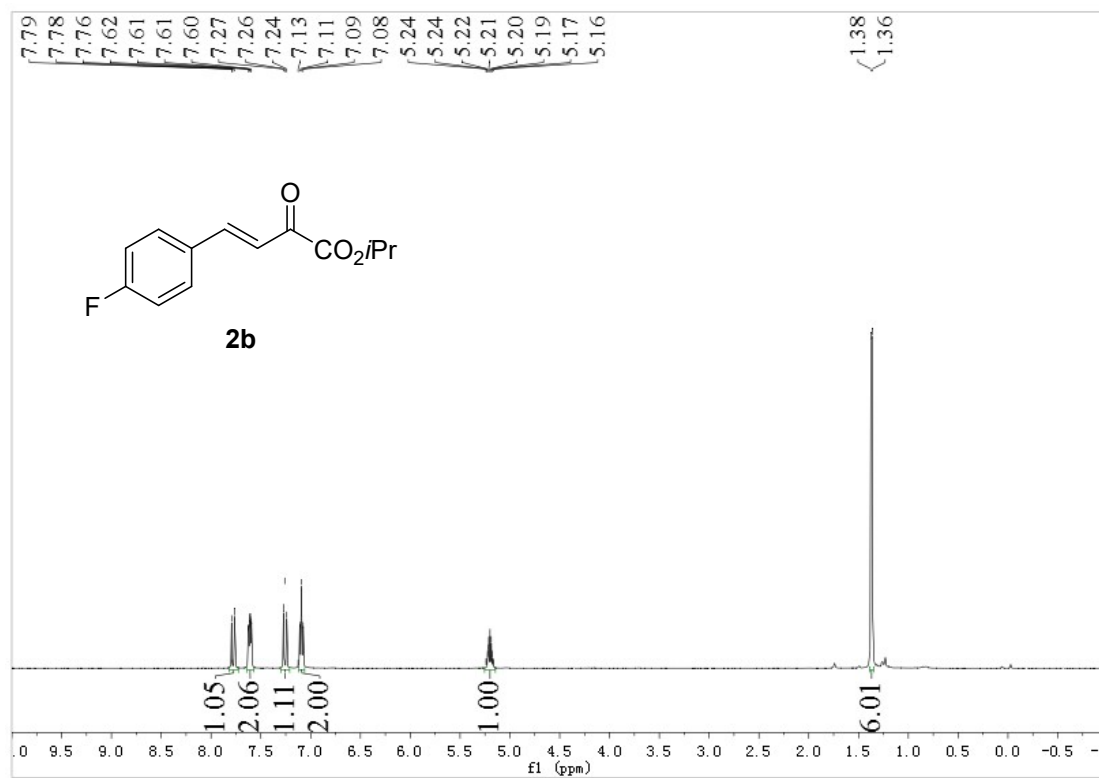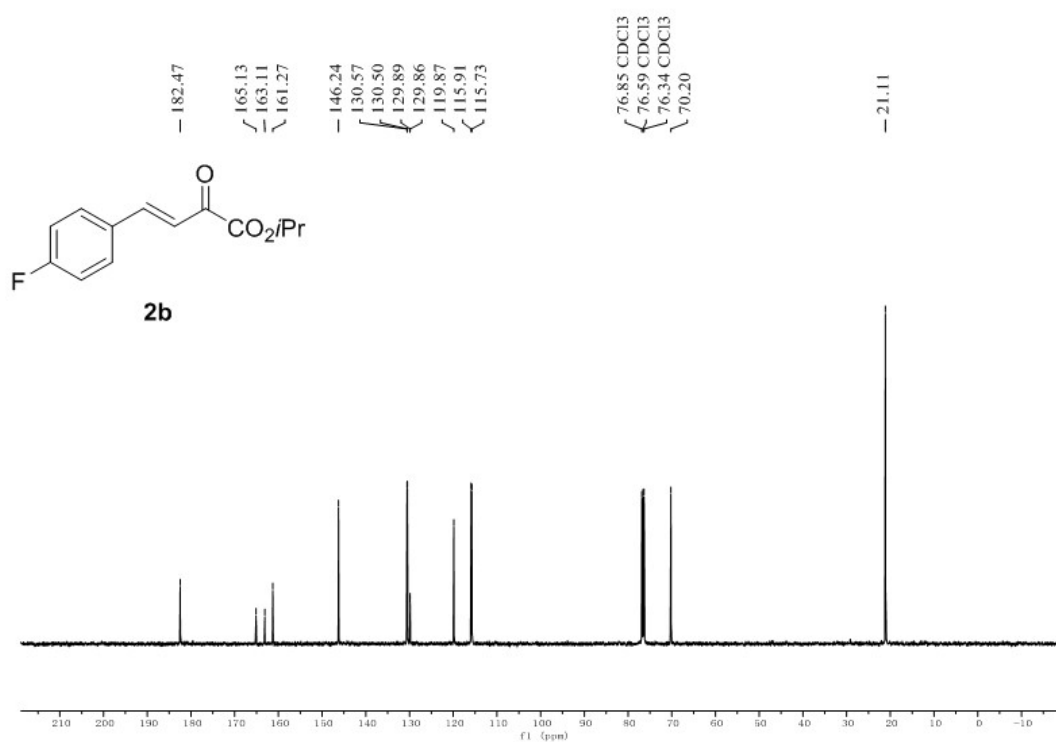

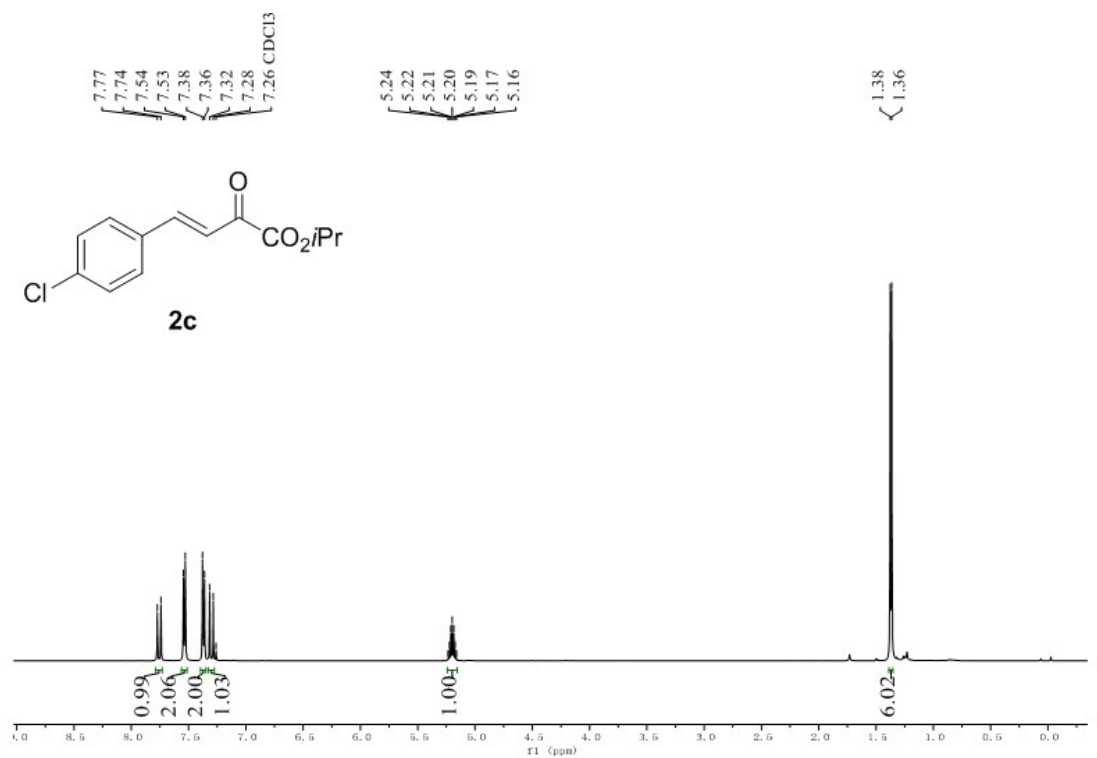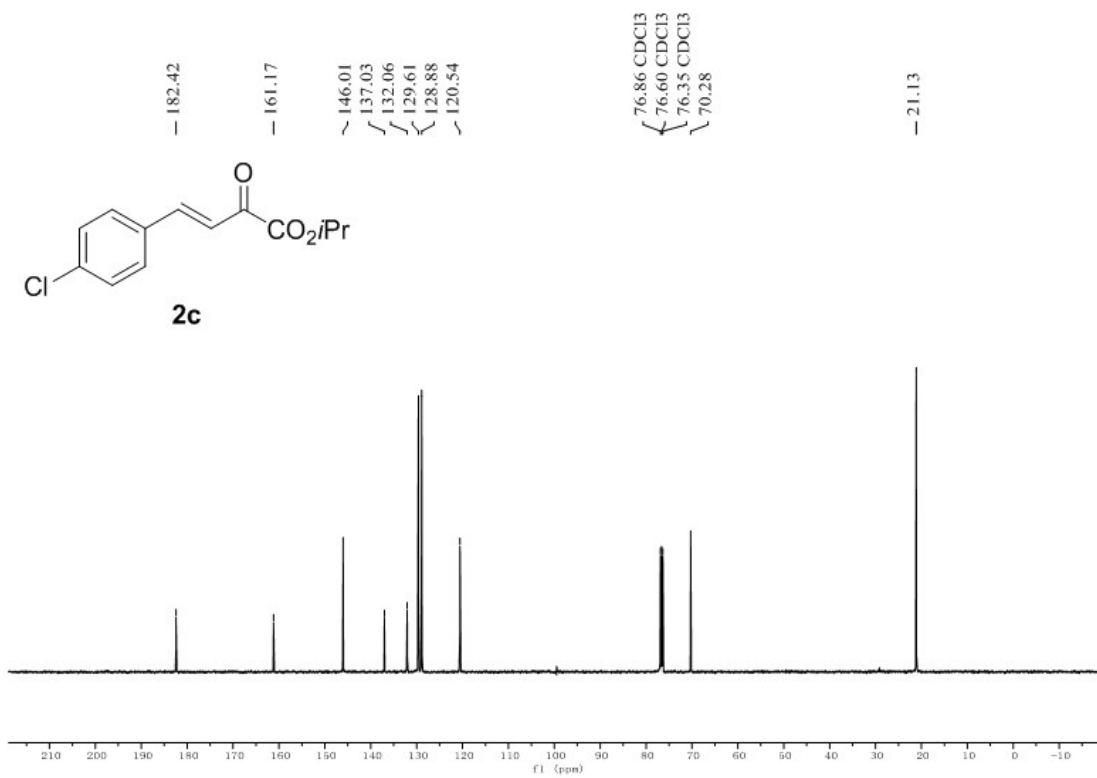

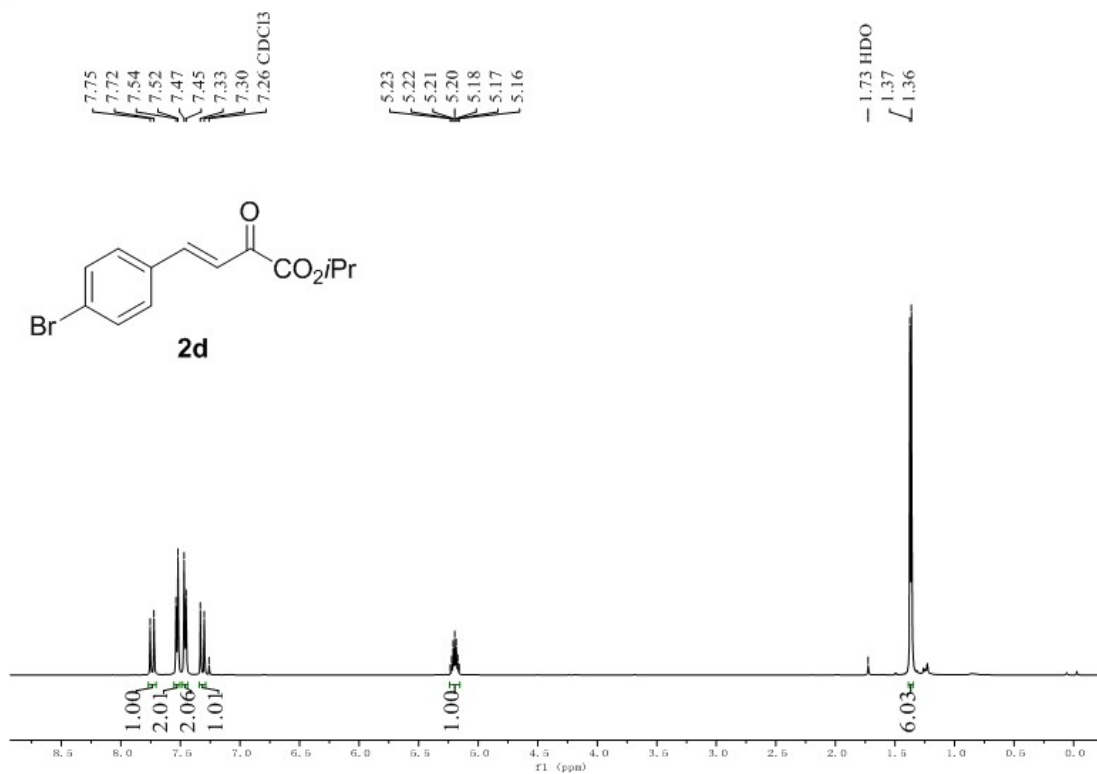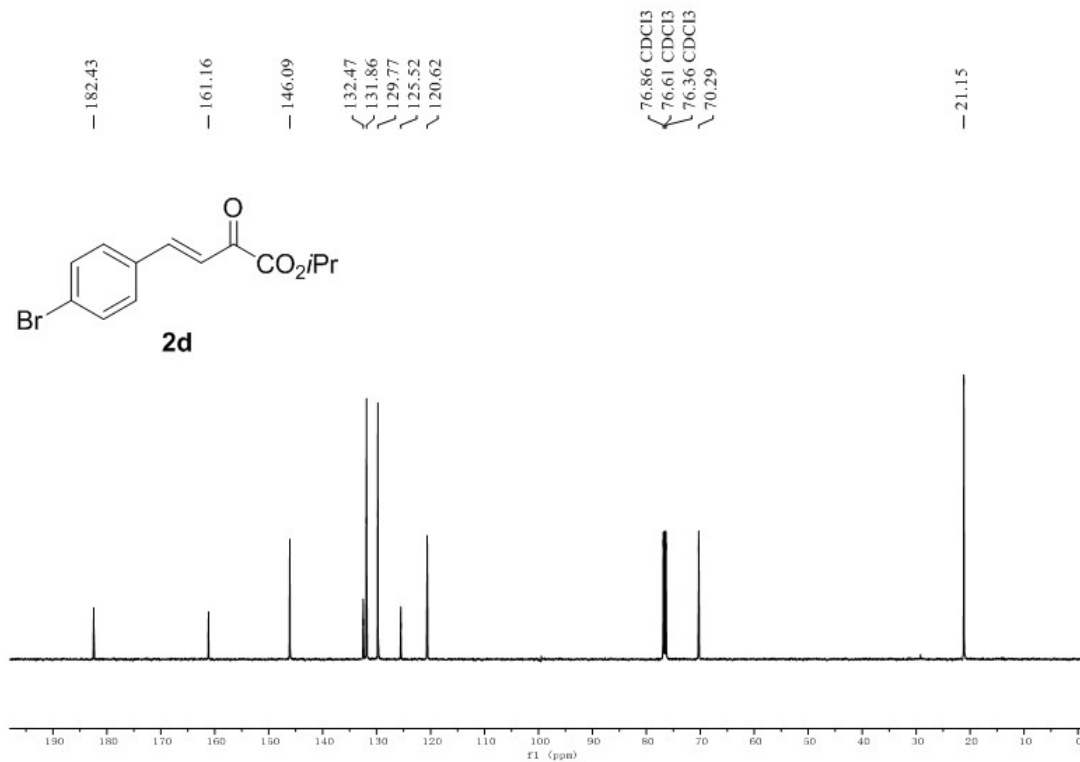

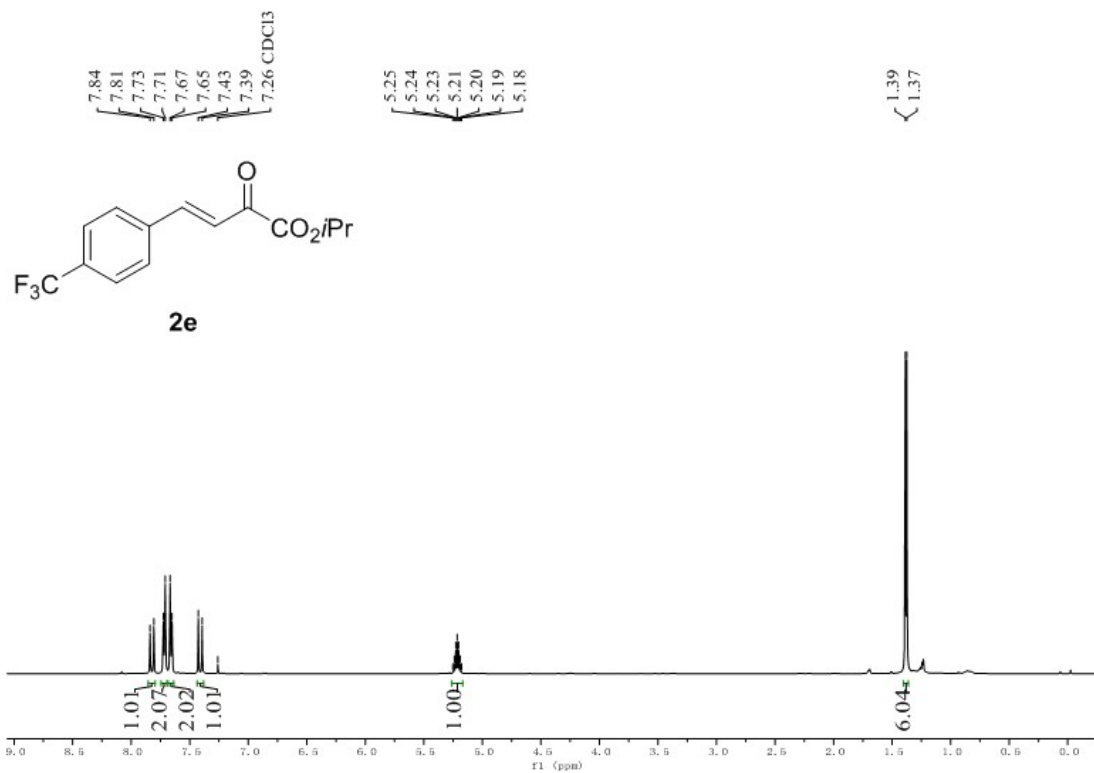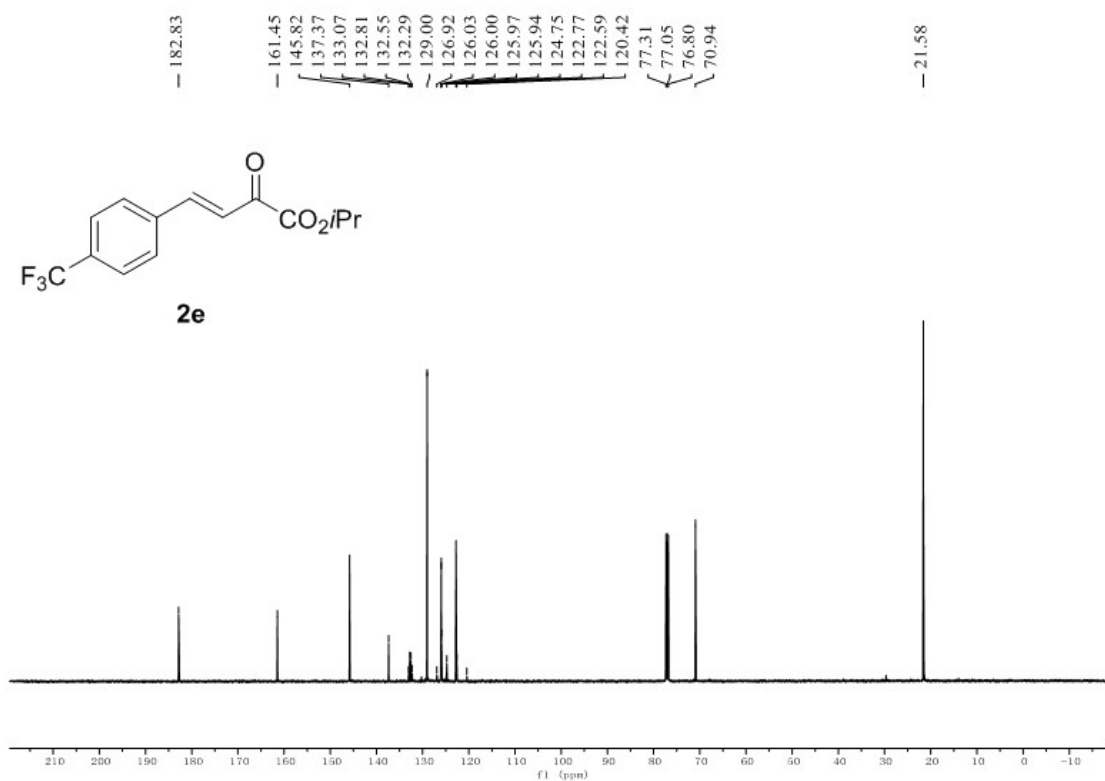

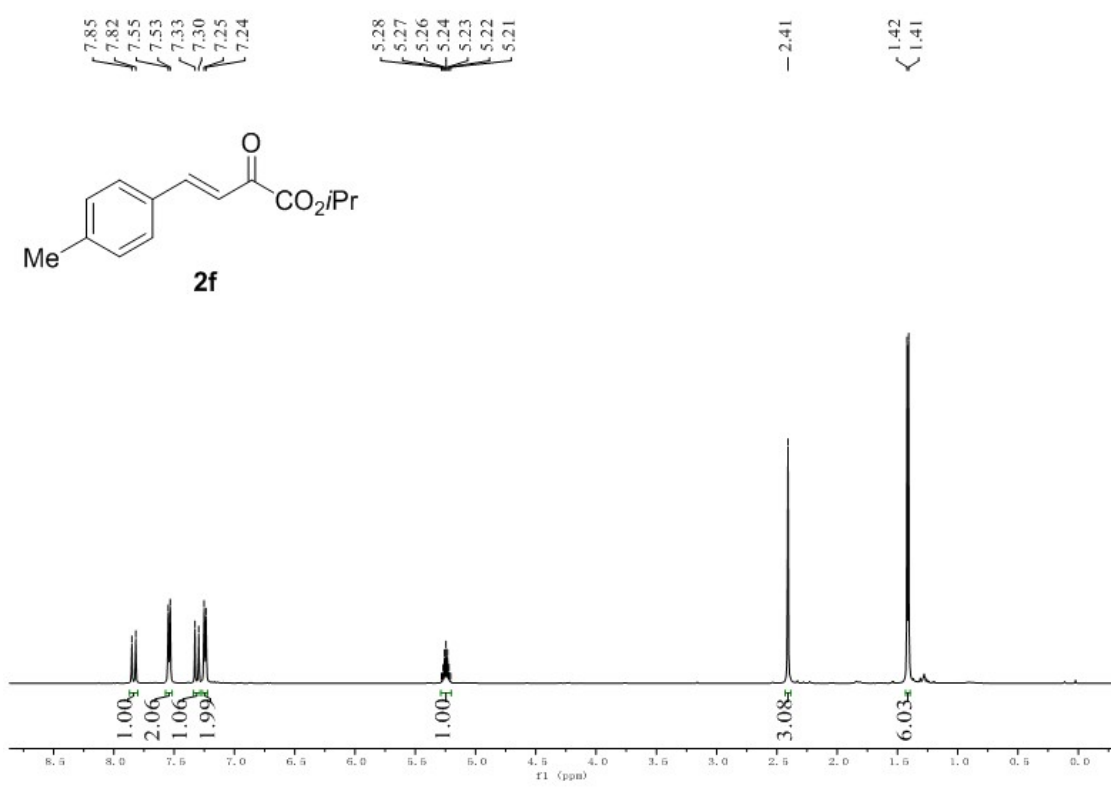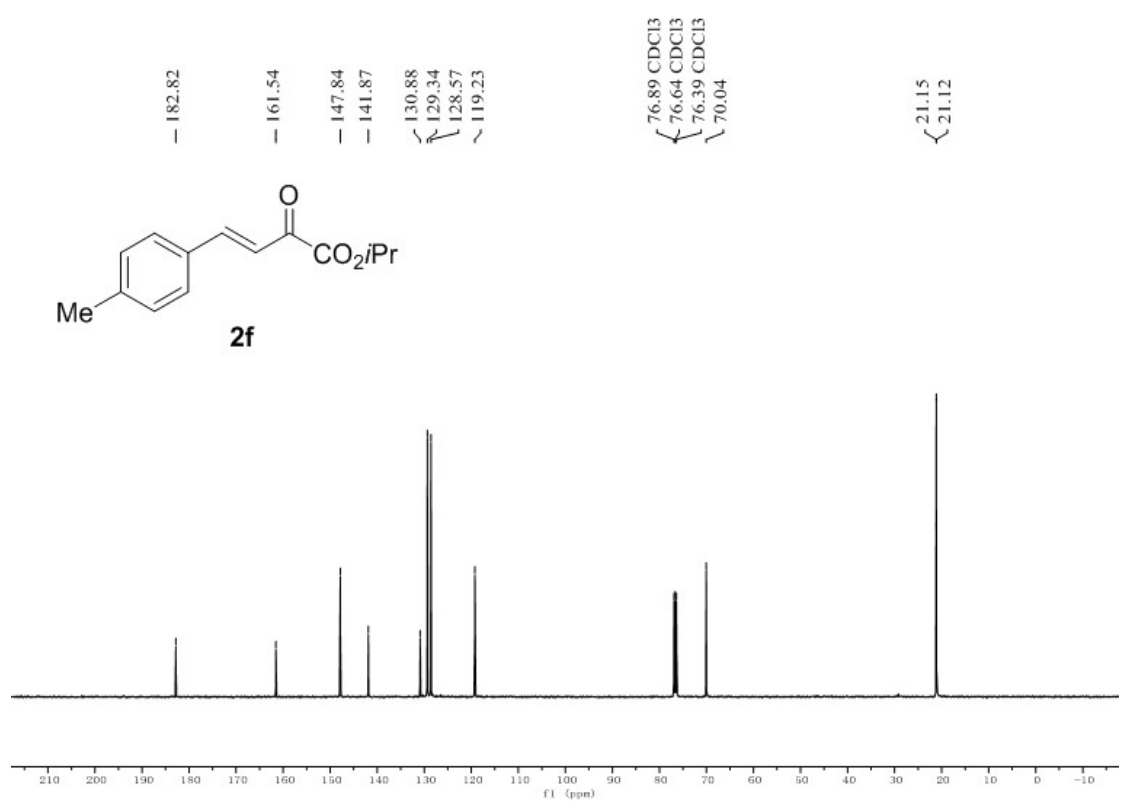



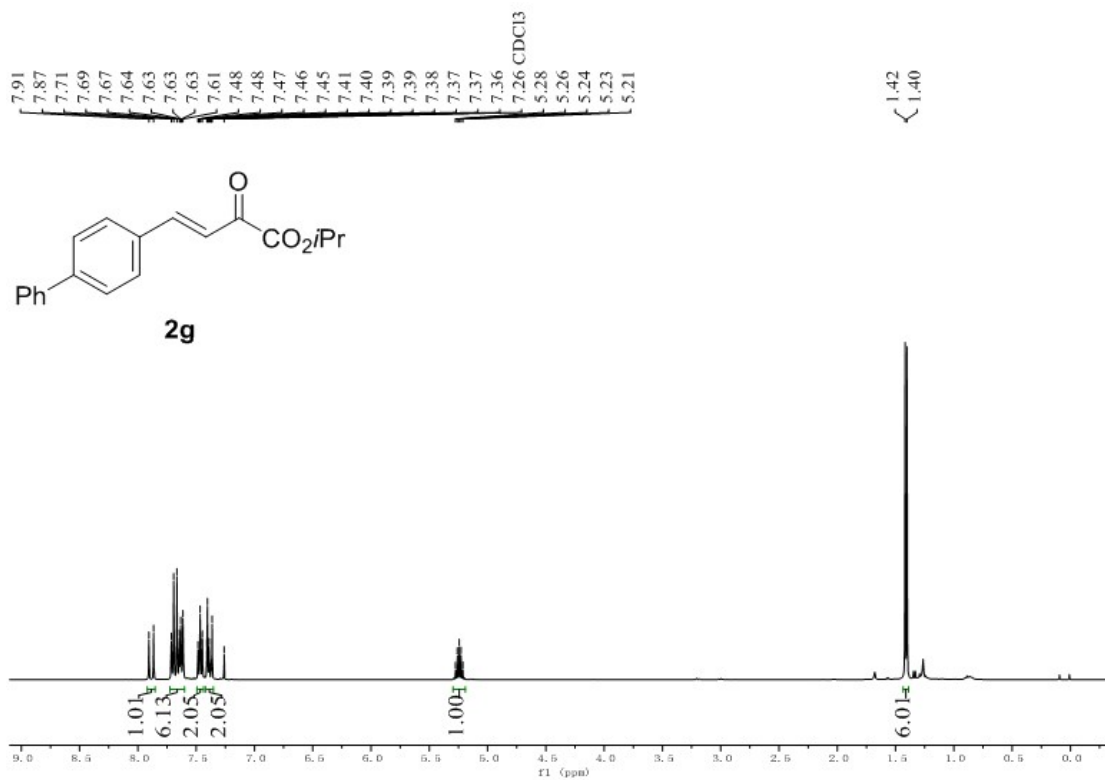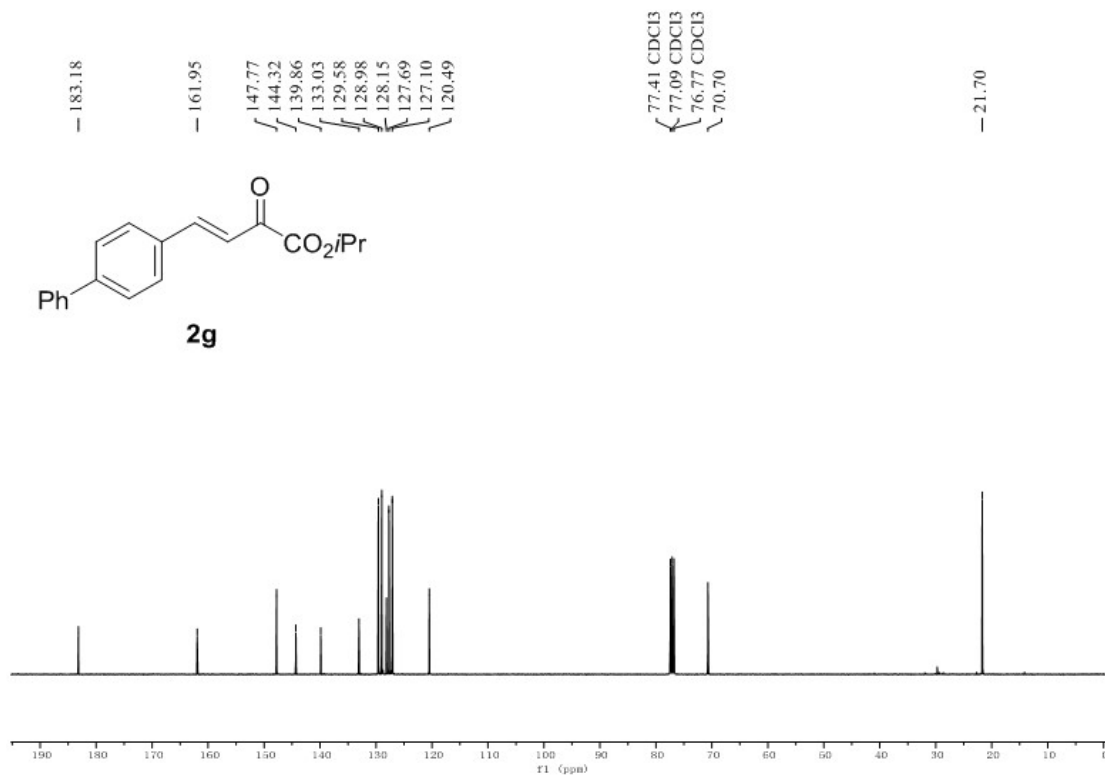

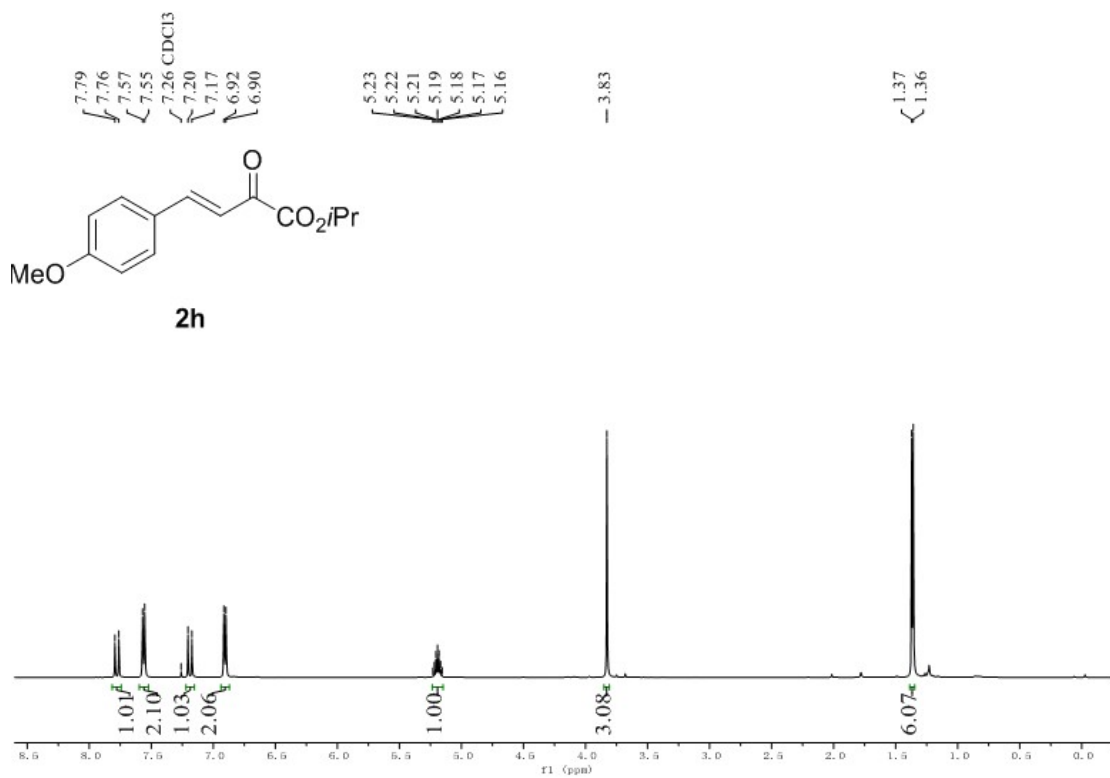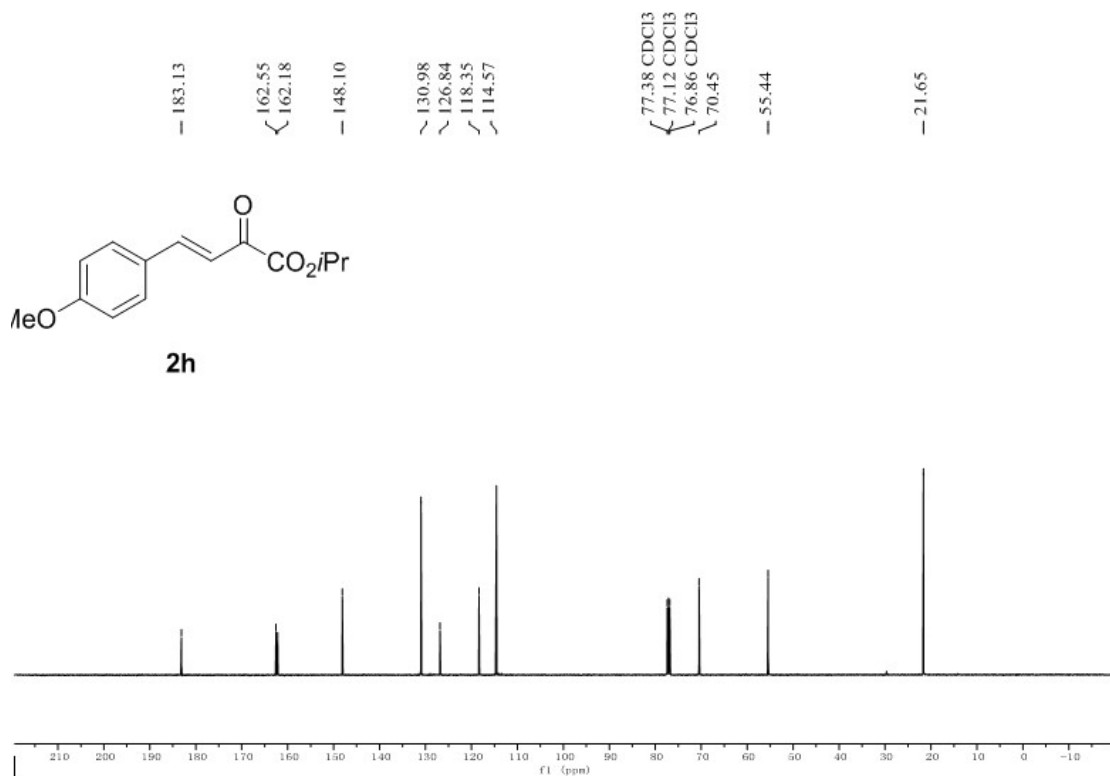

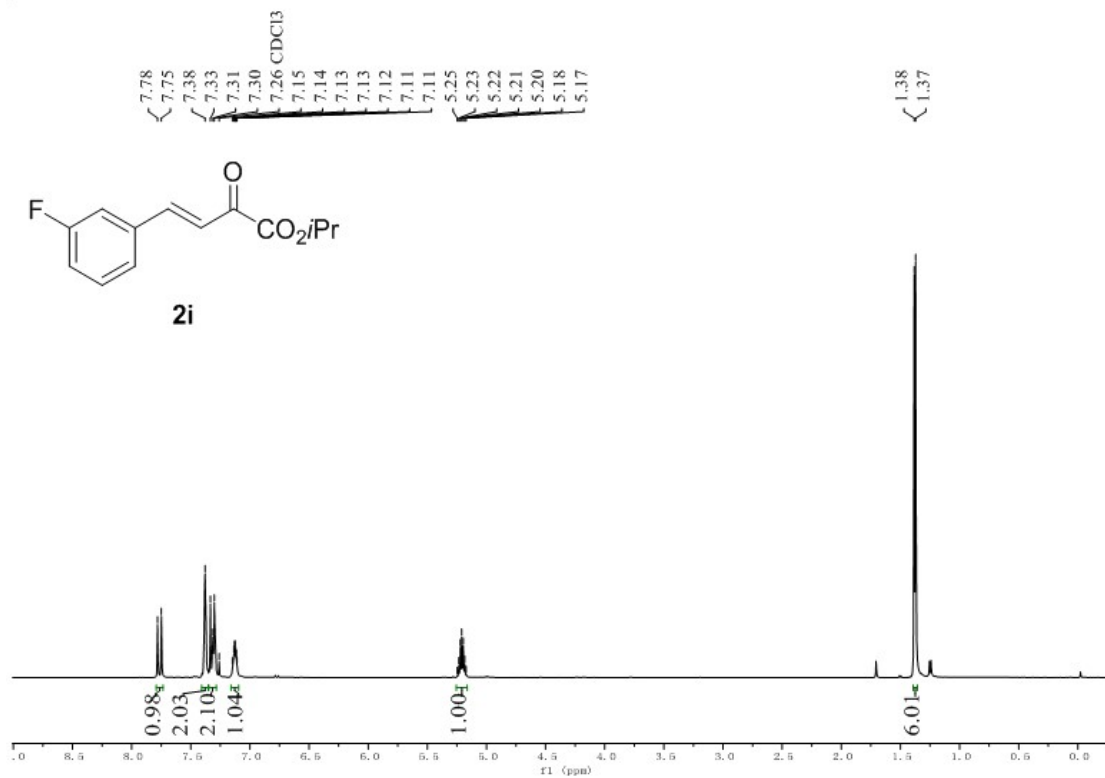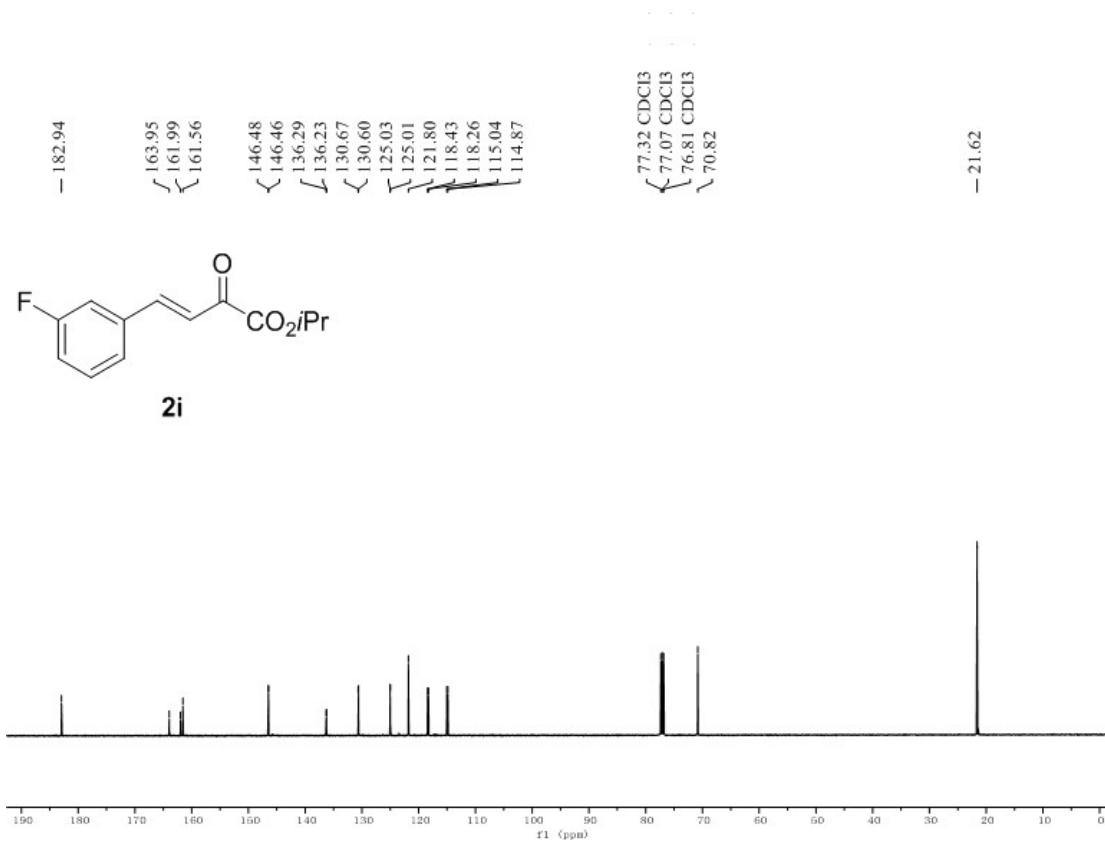

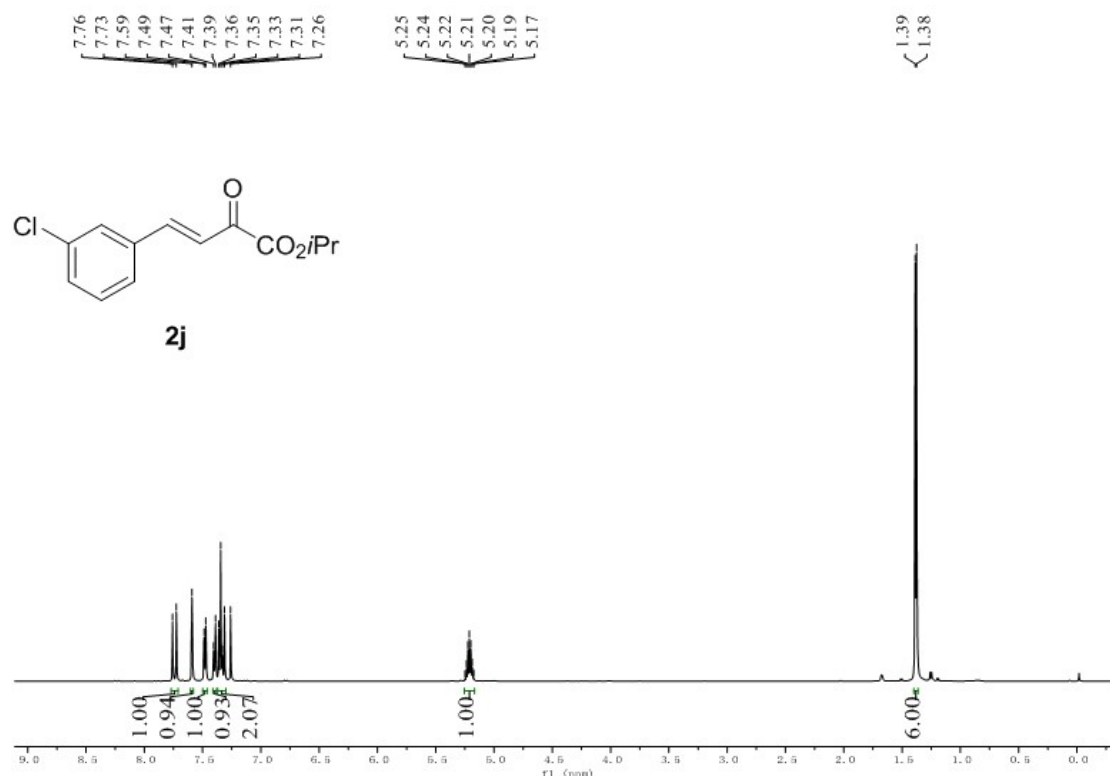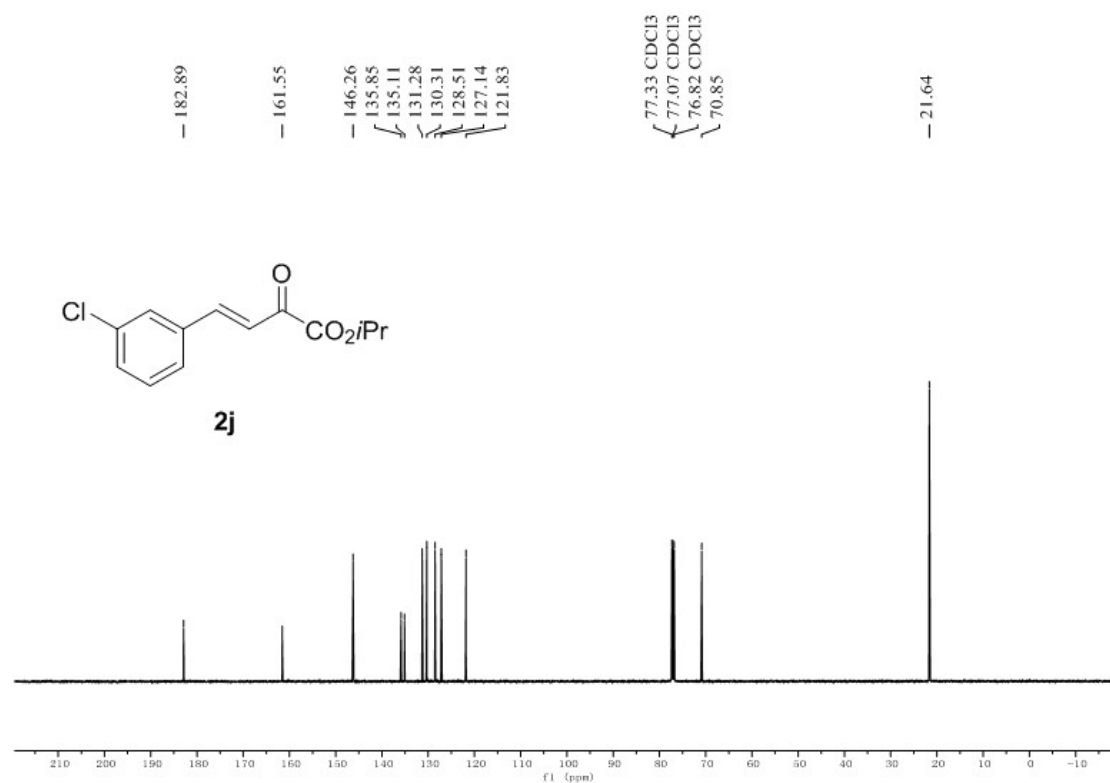

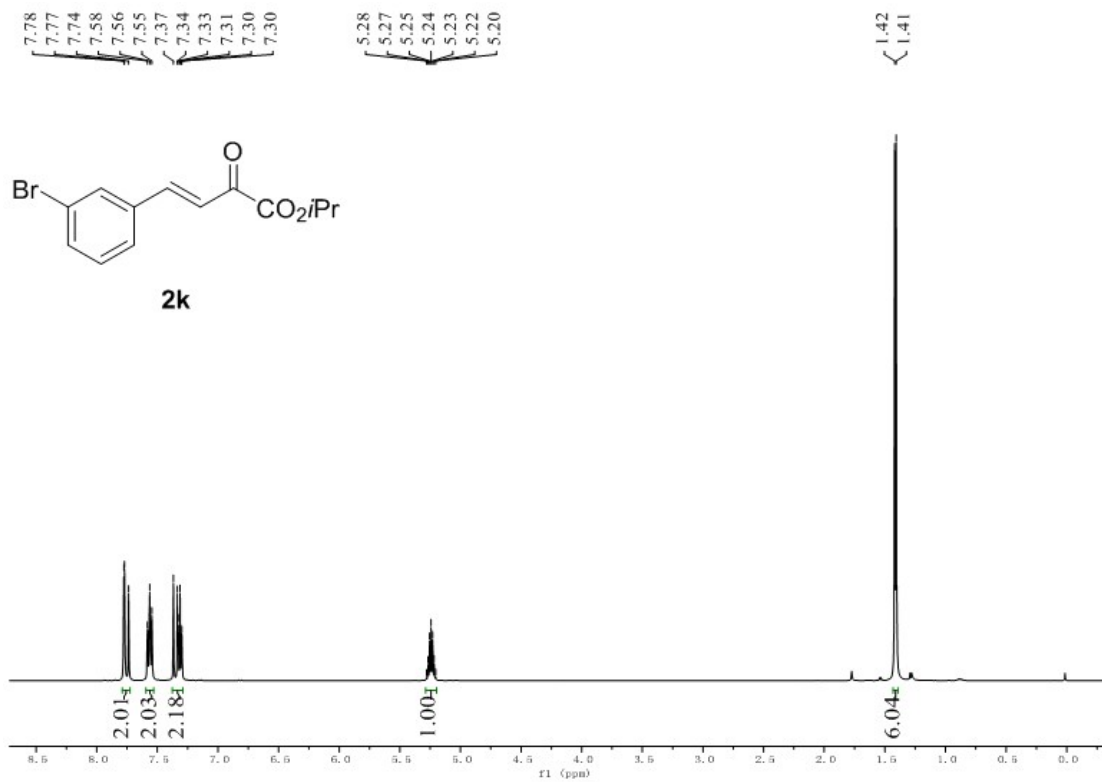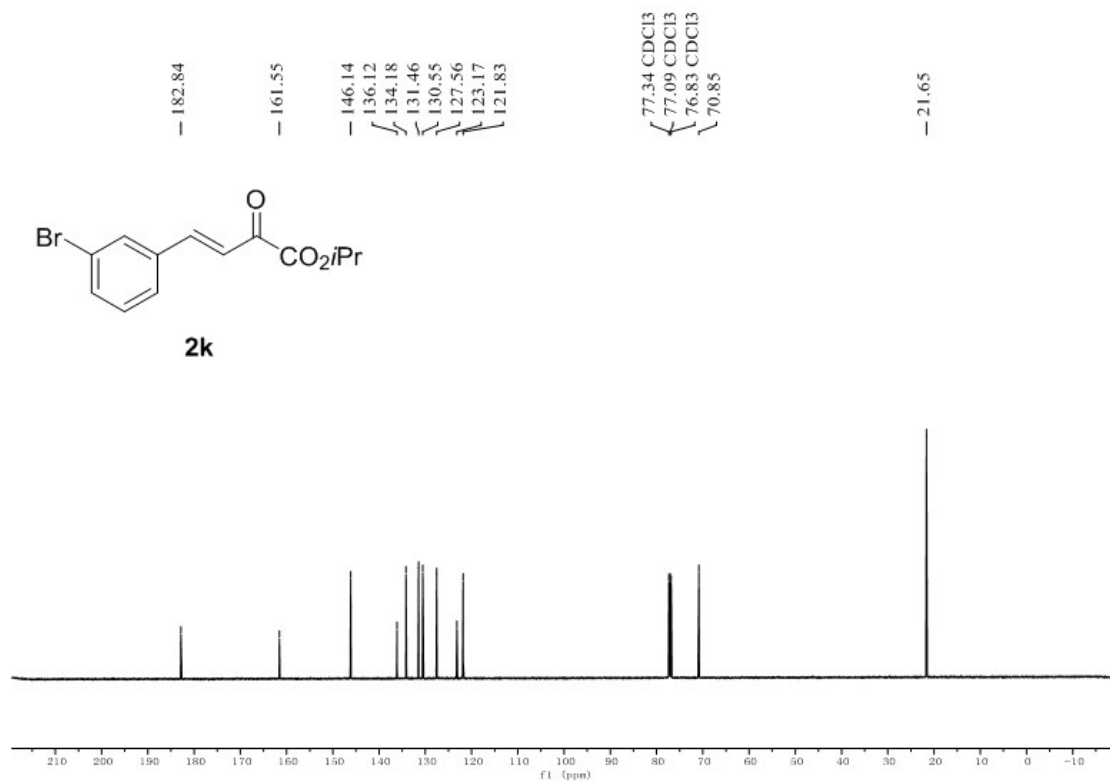

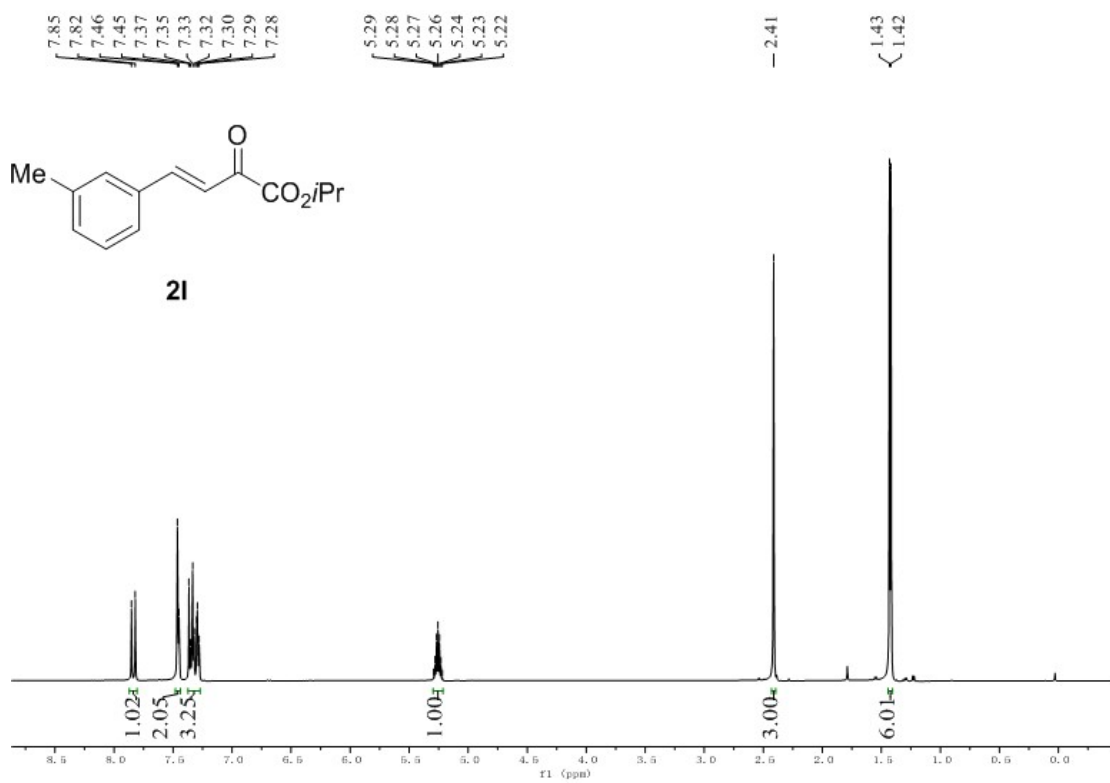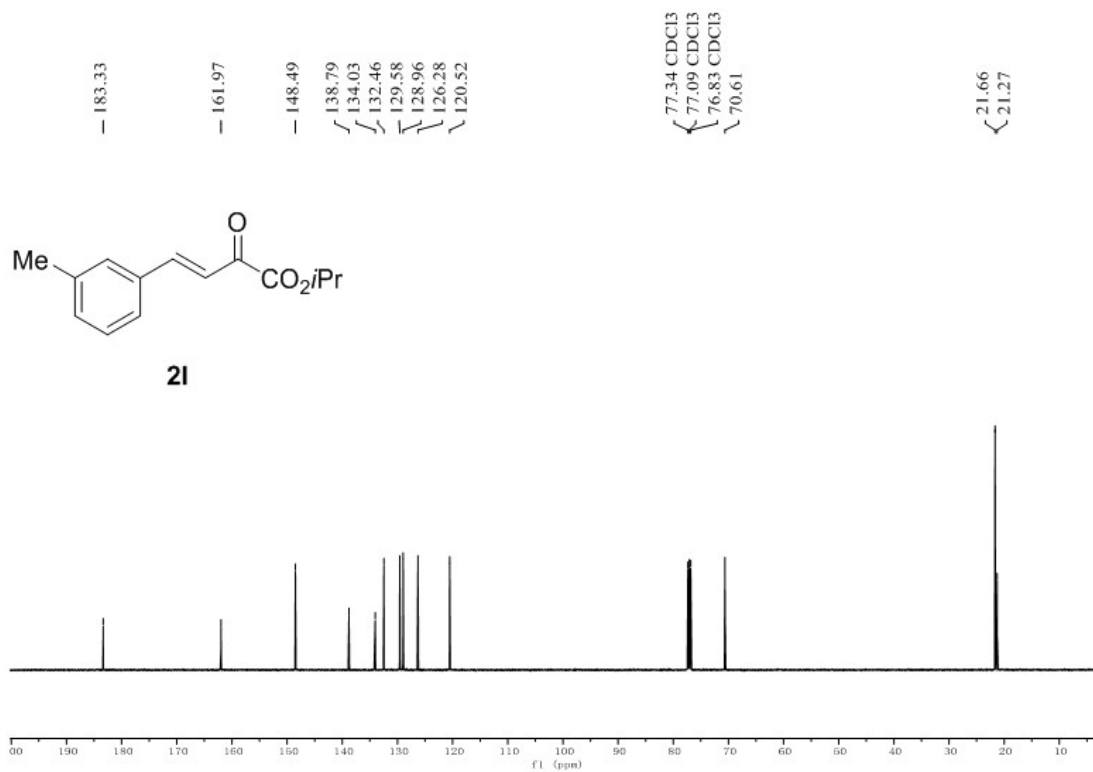

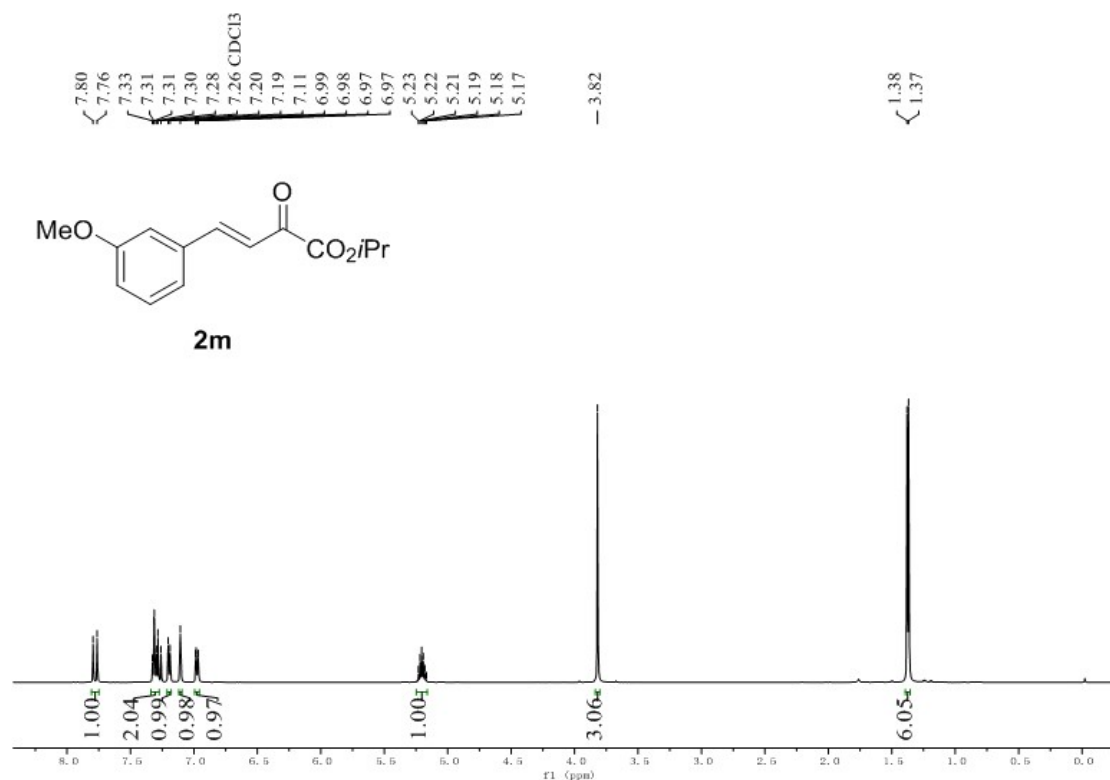

3 3 3

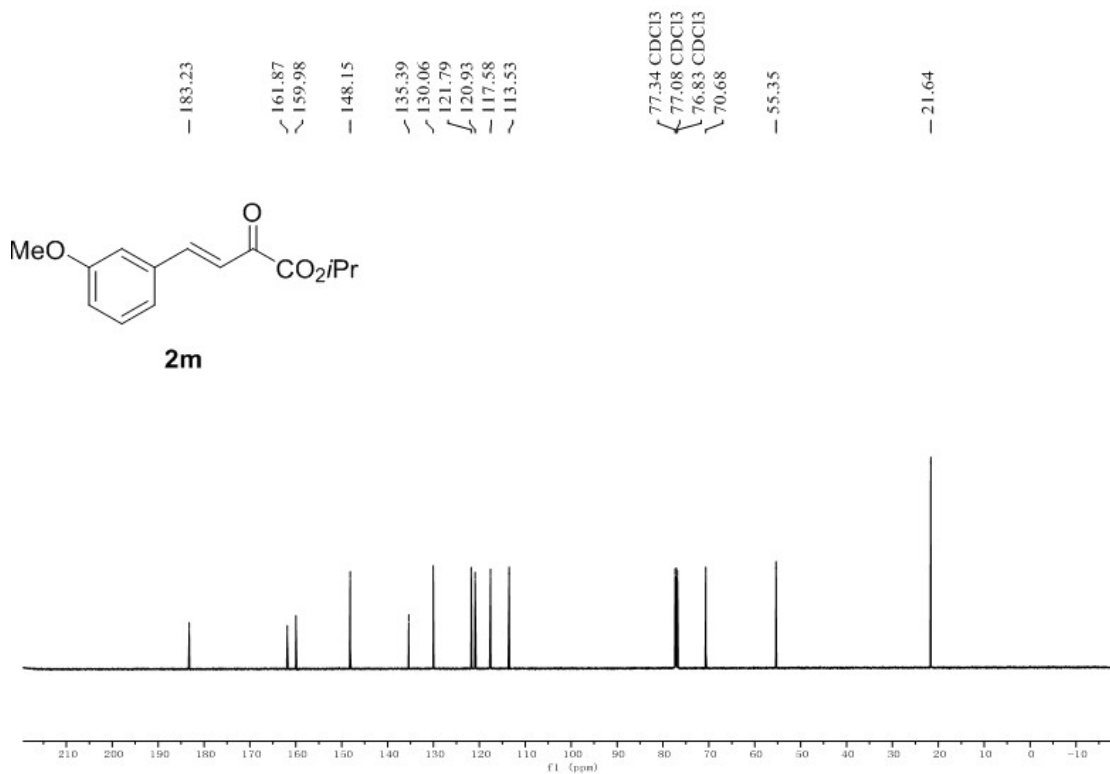

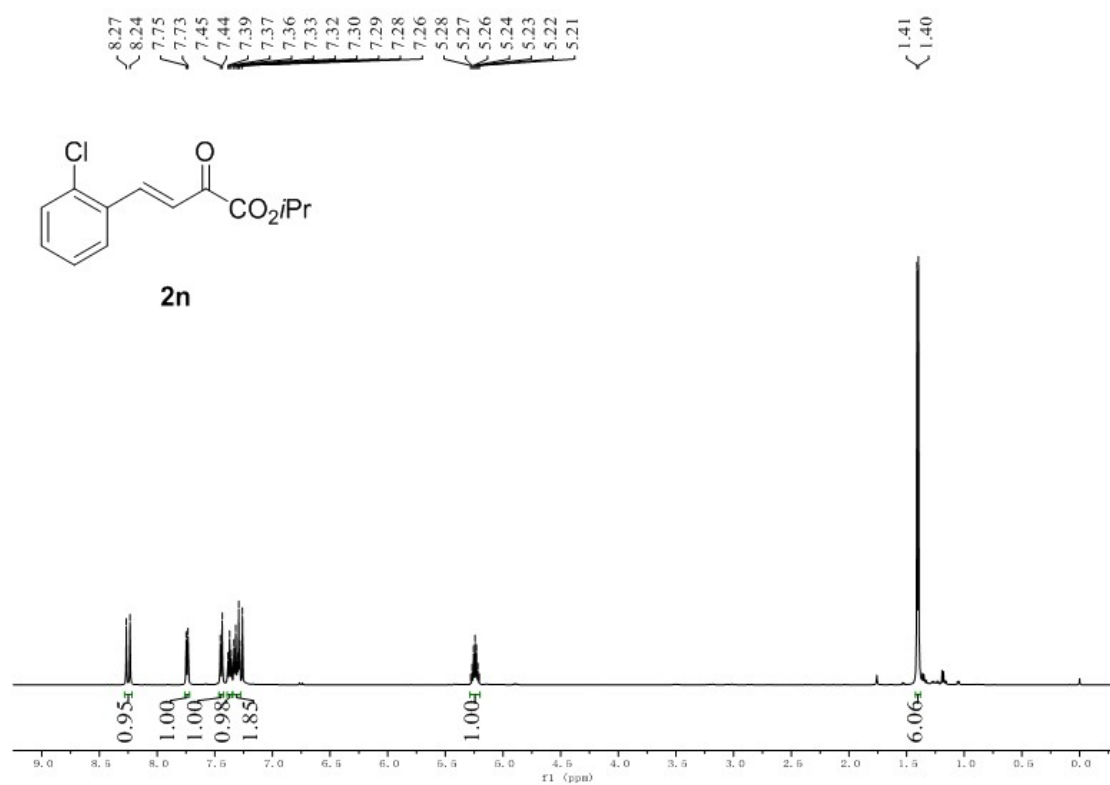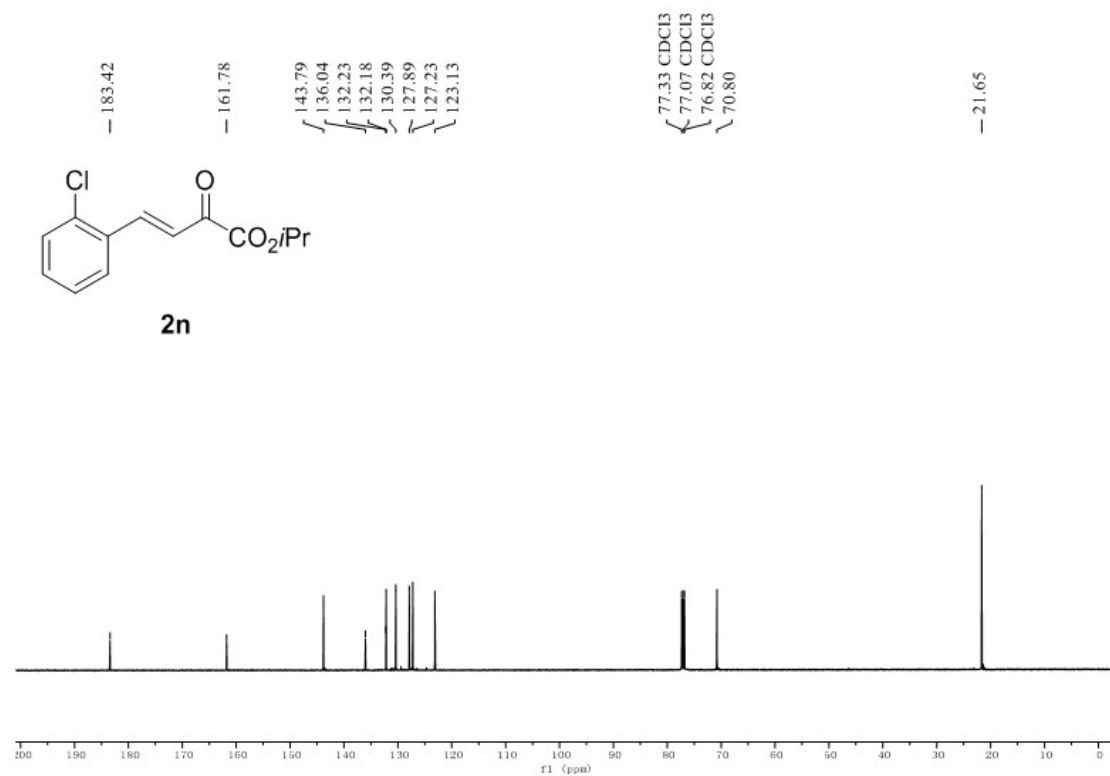



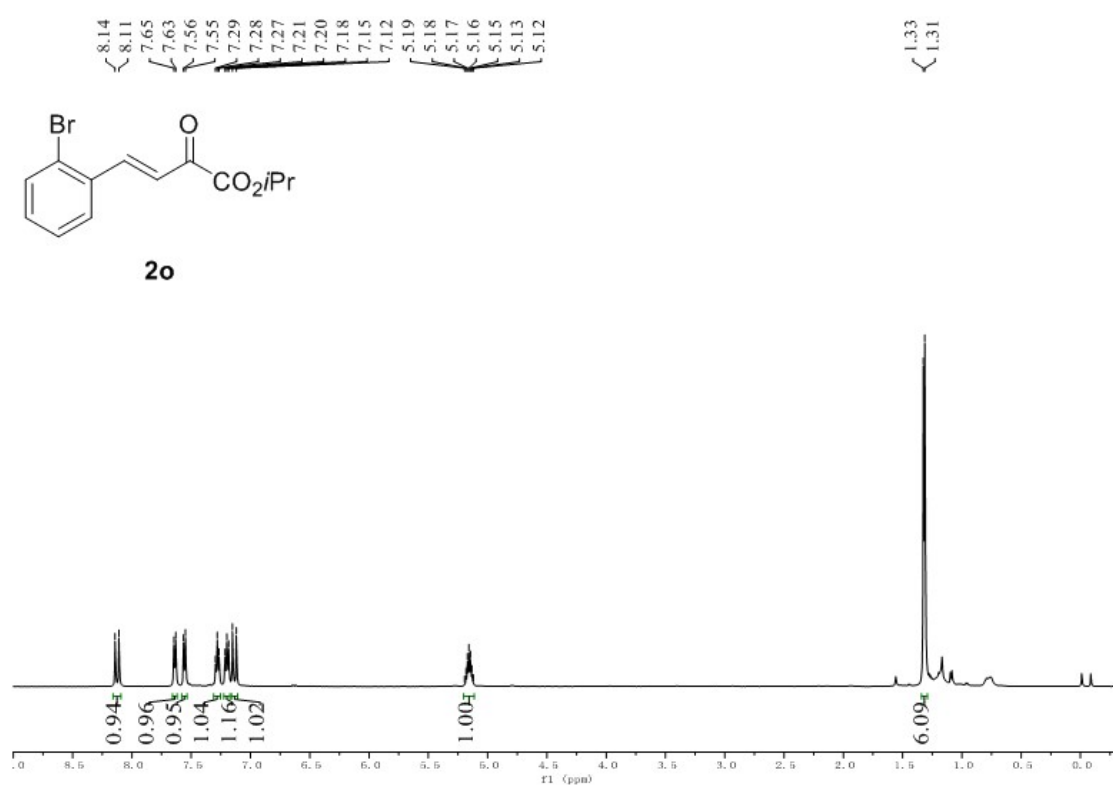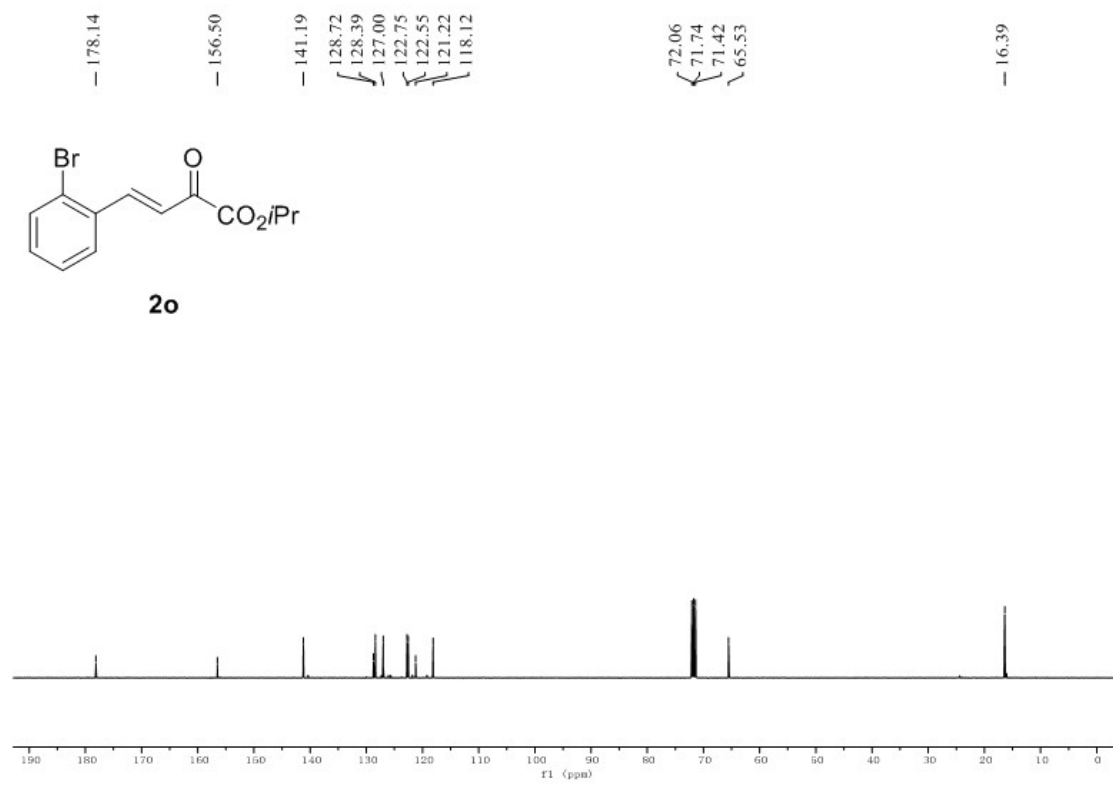

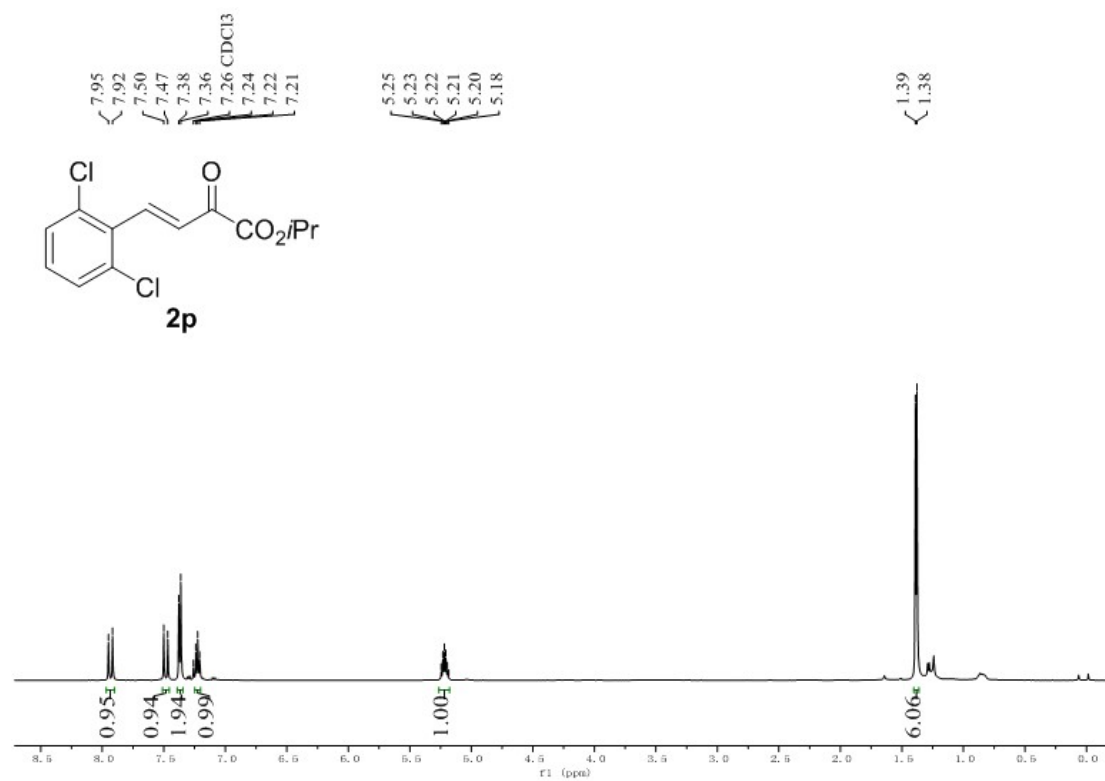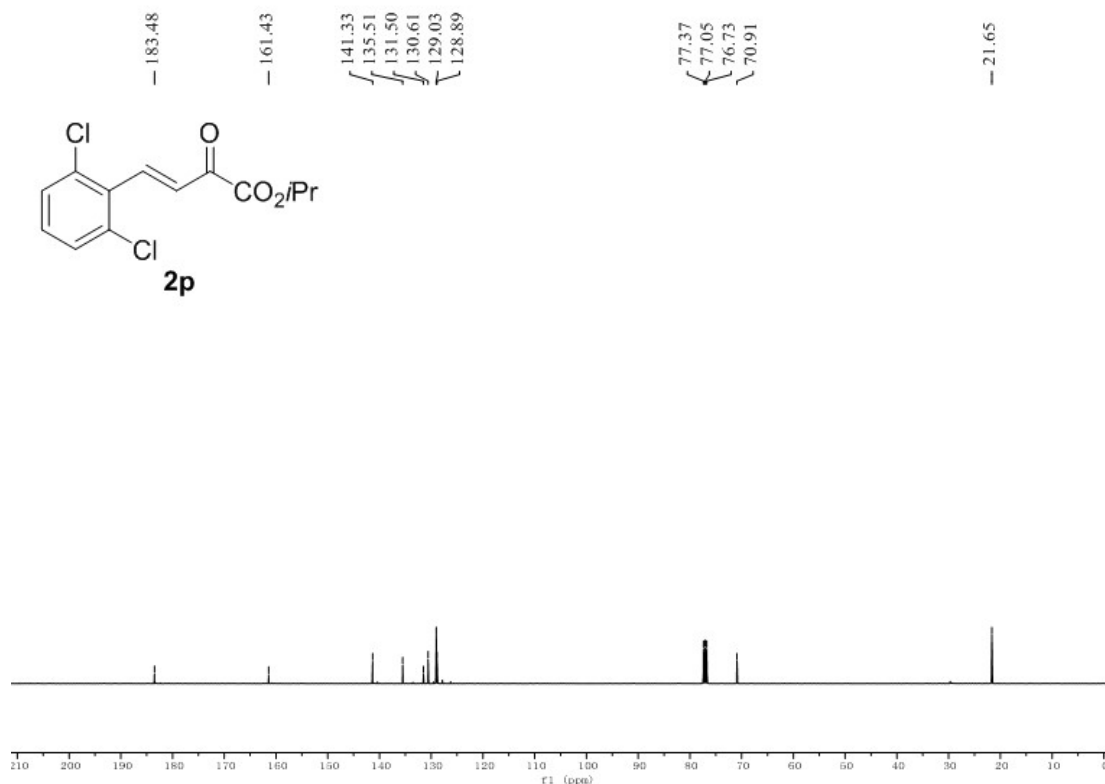

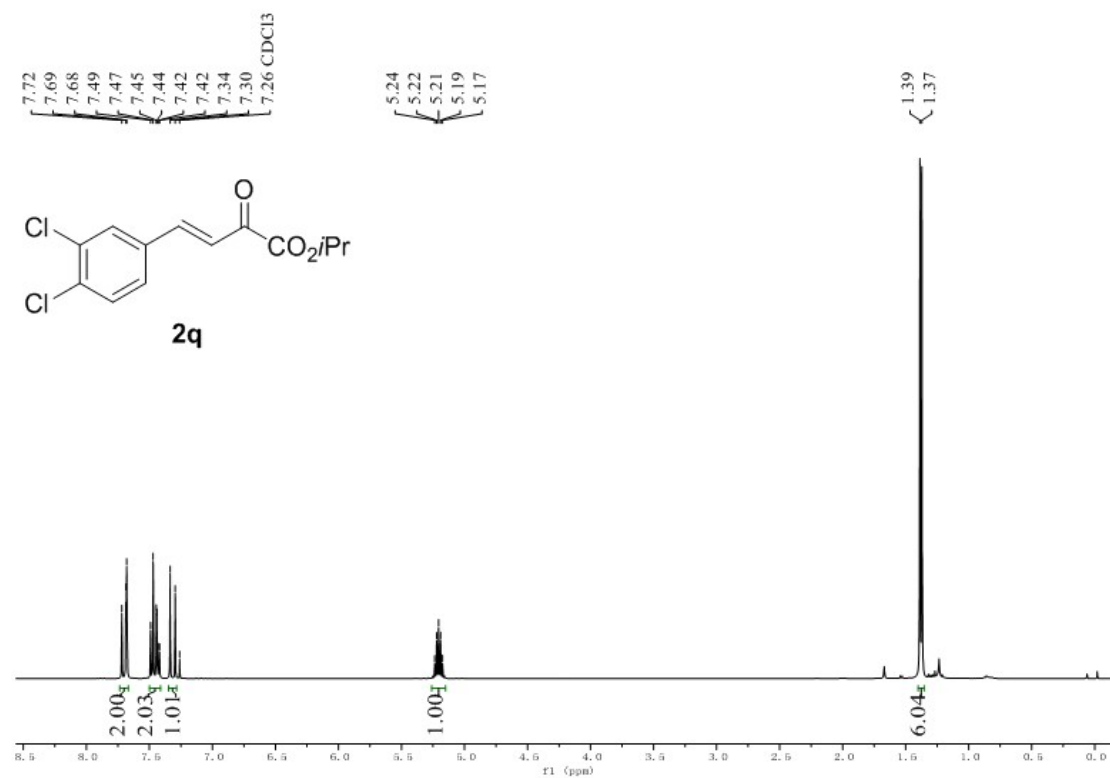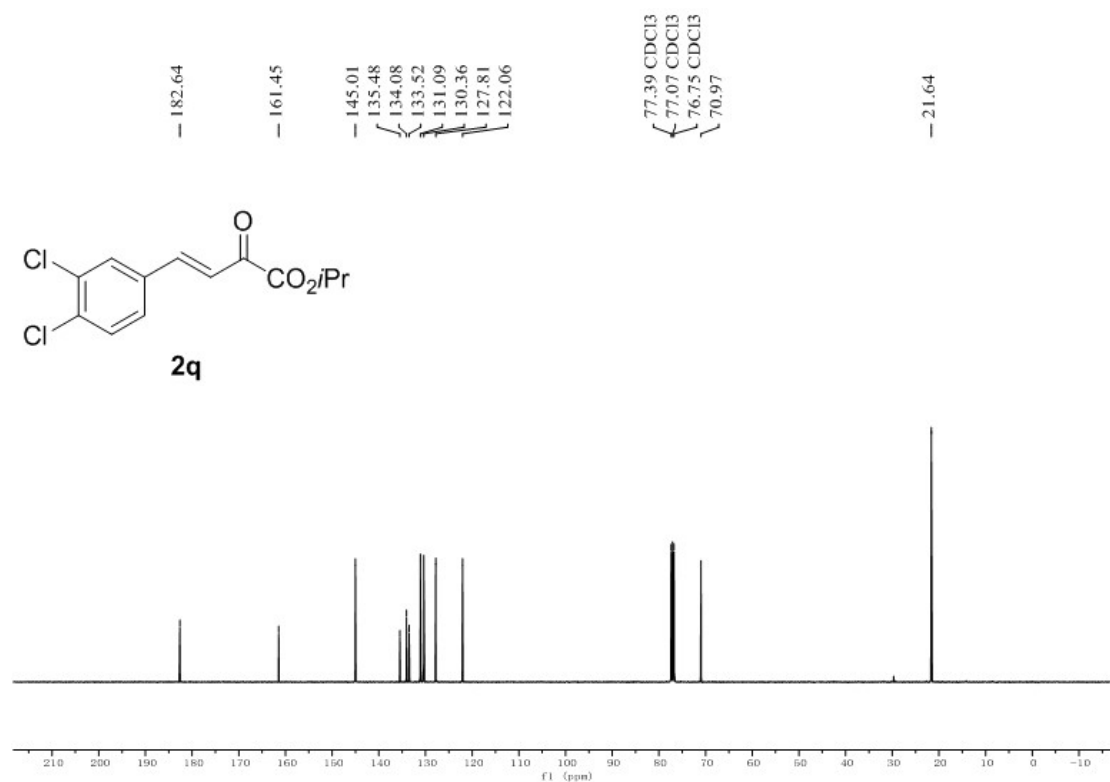

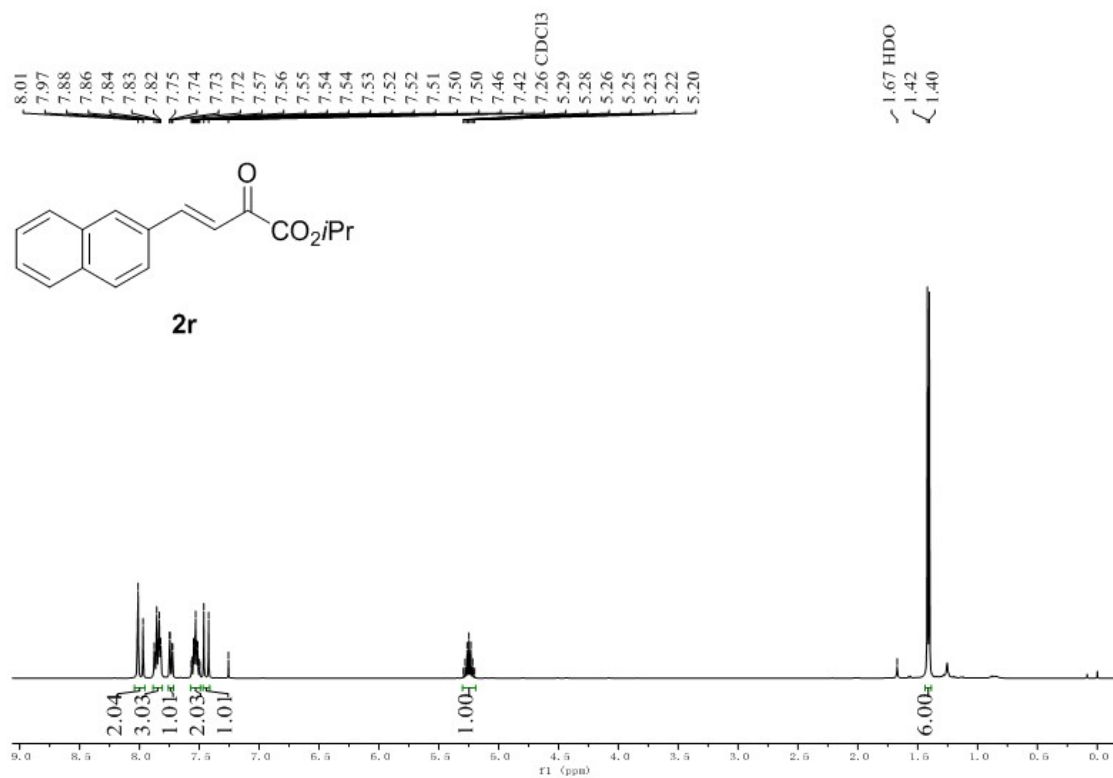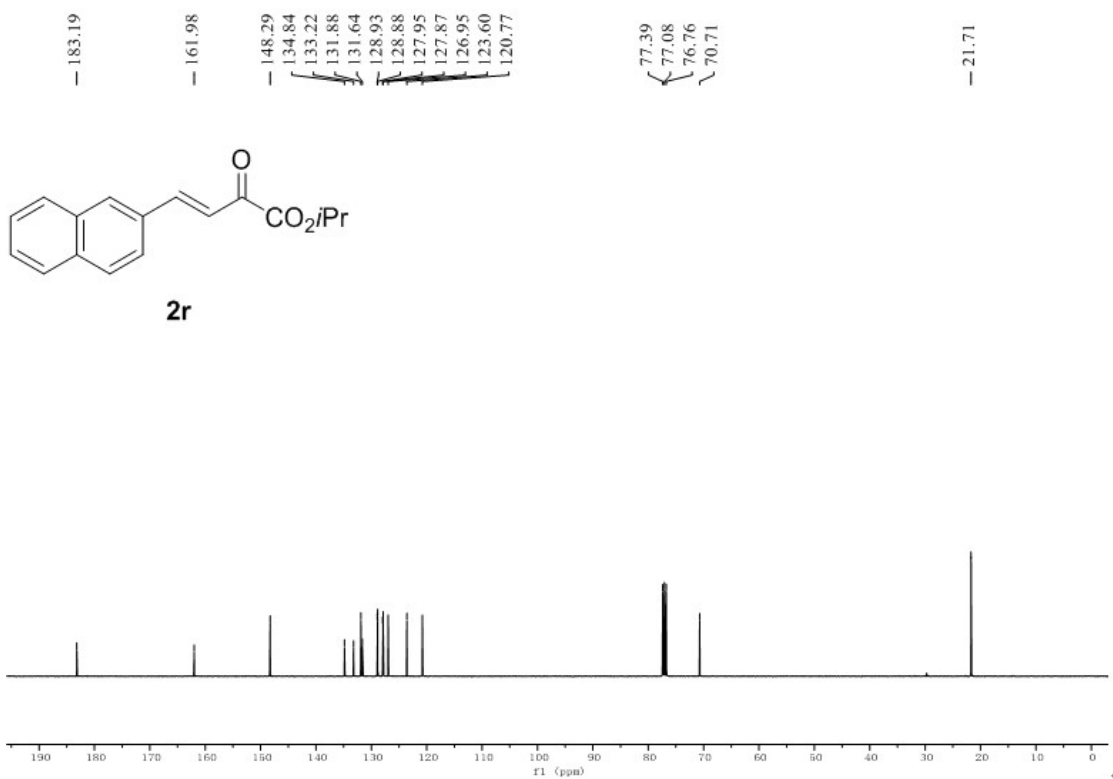

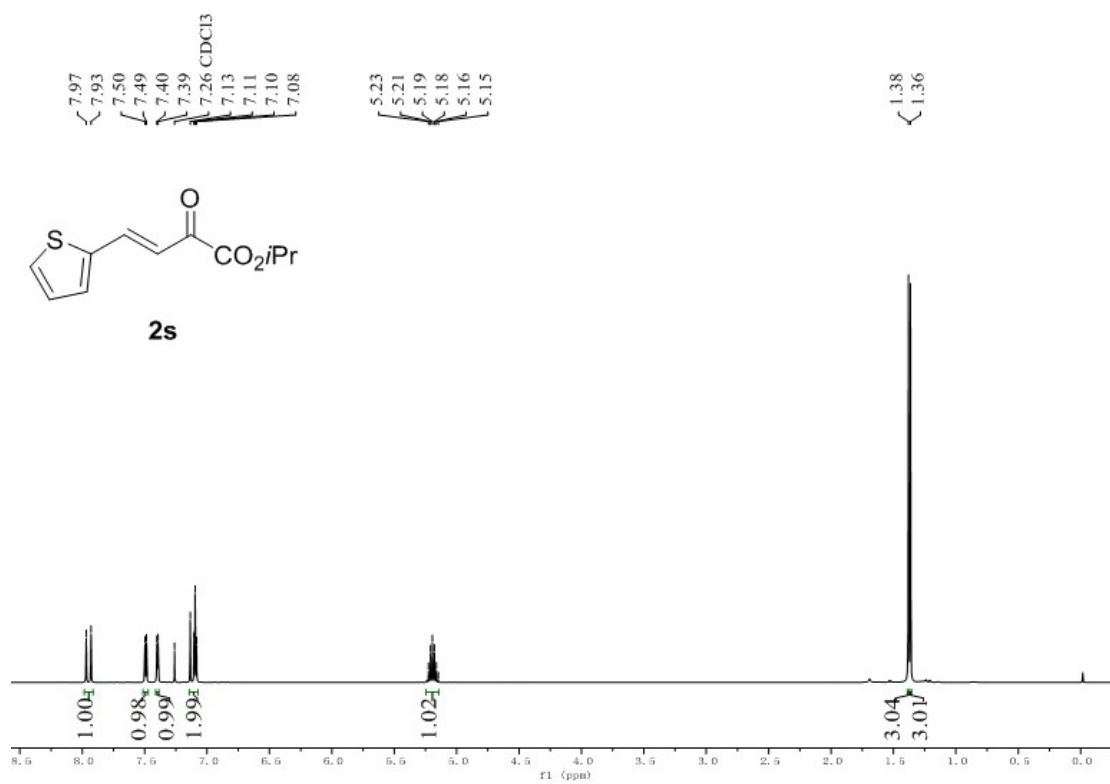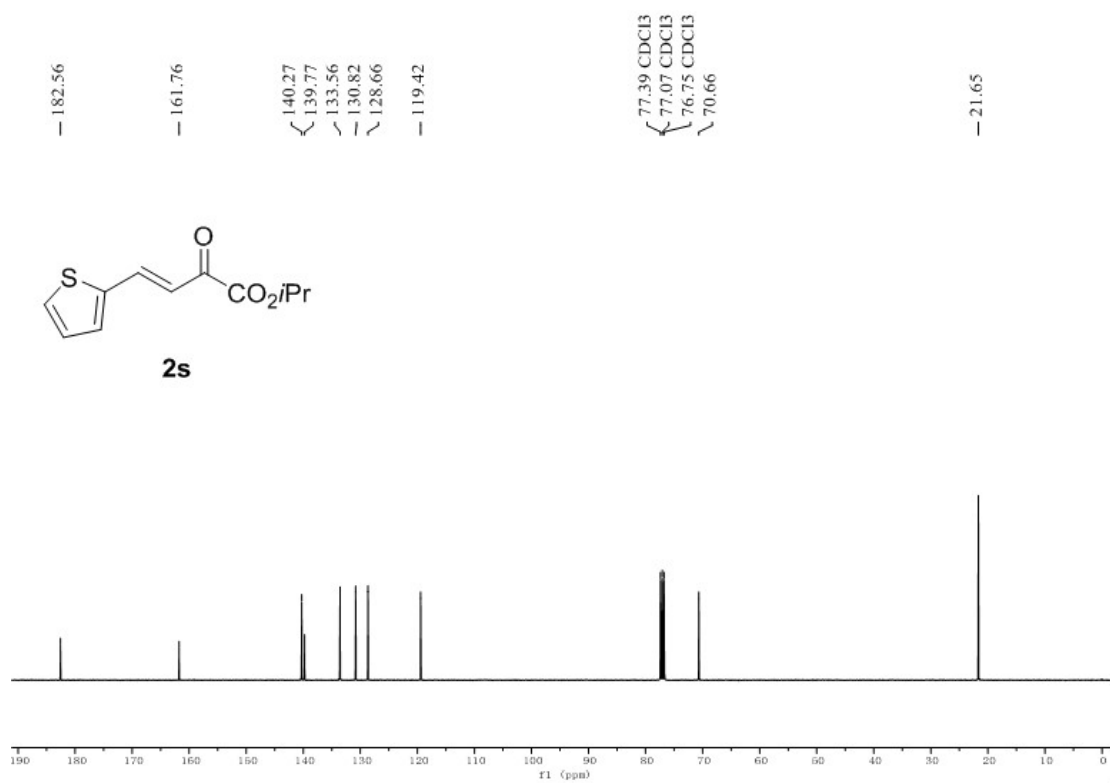

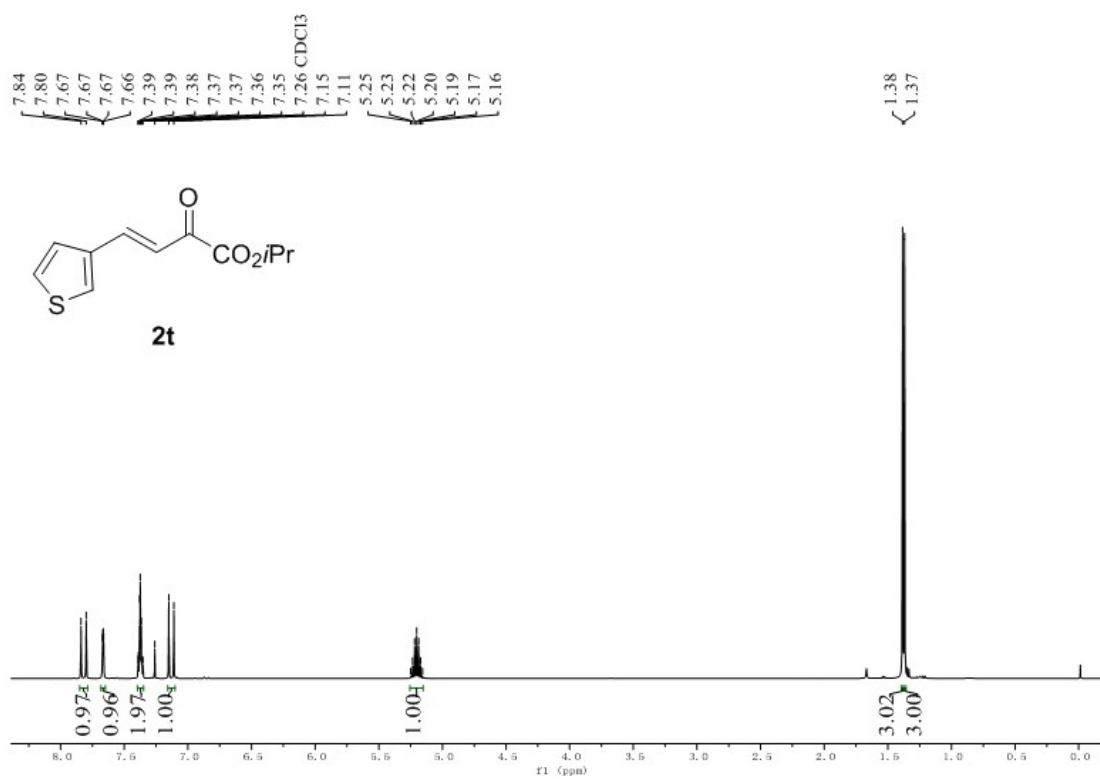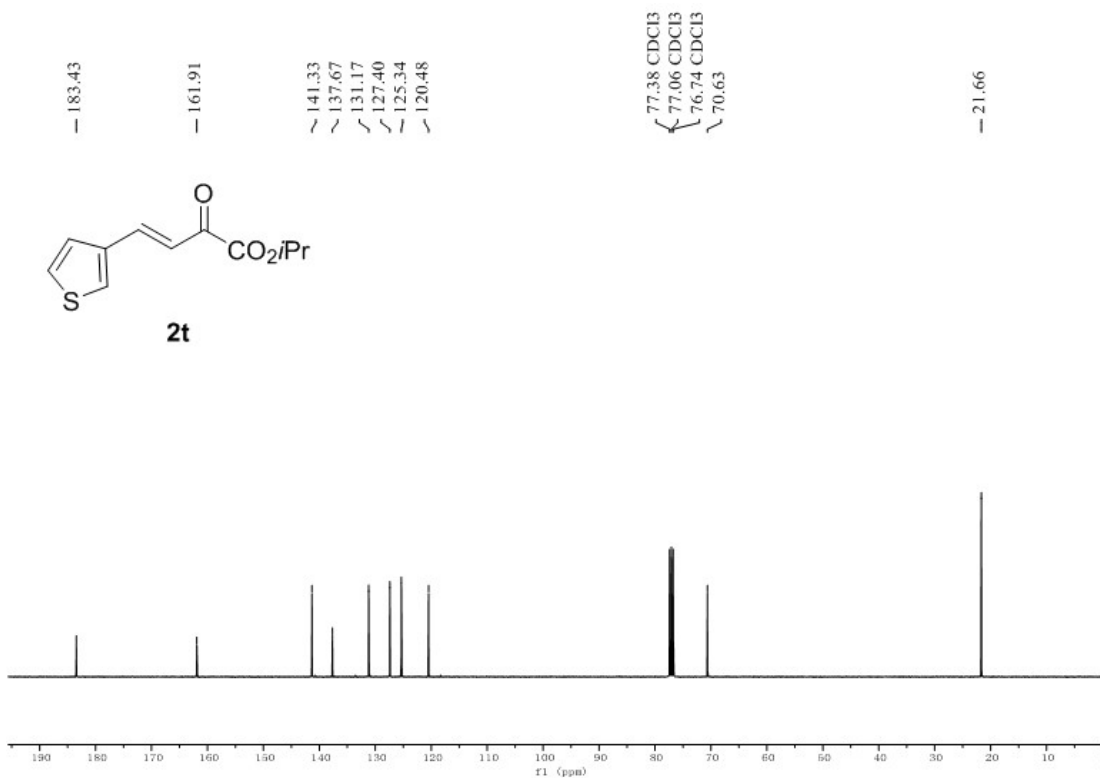

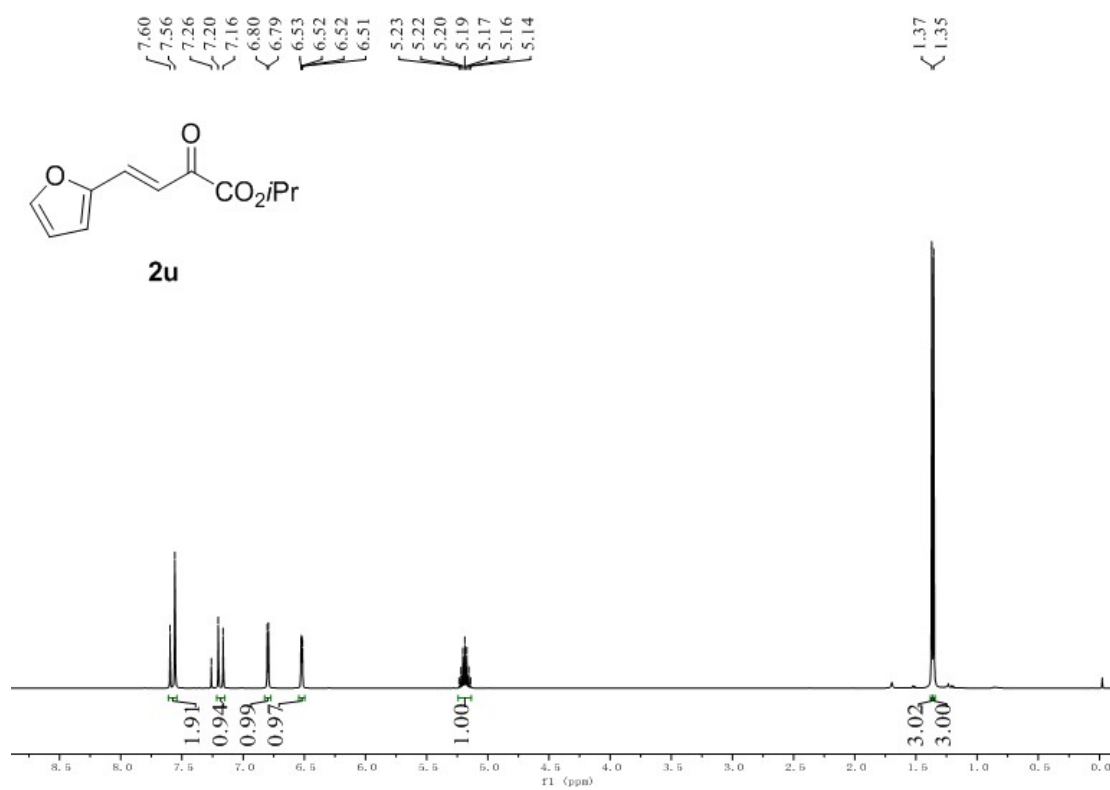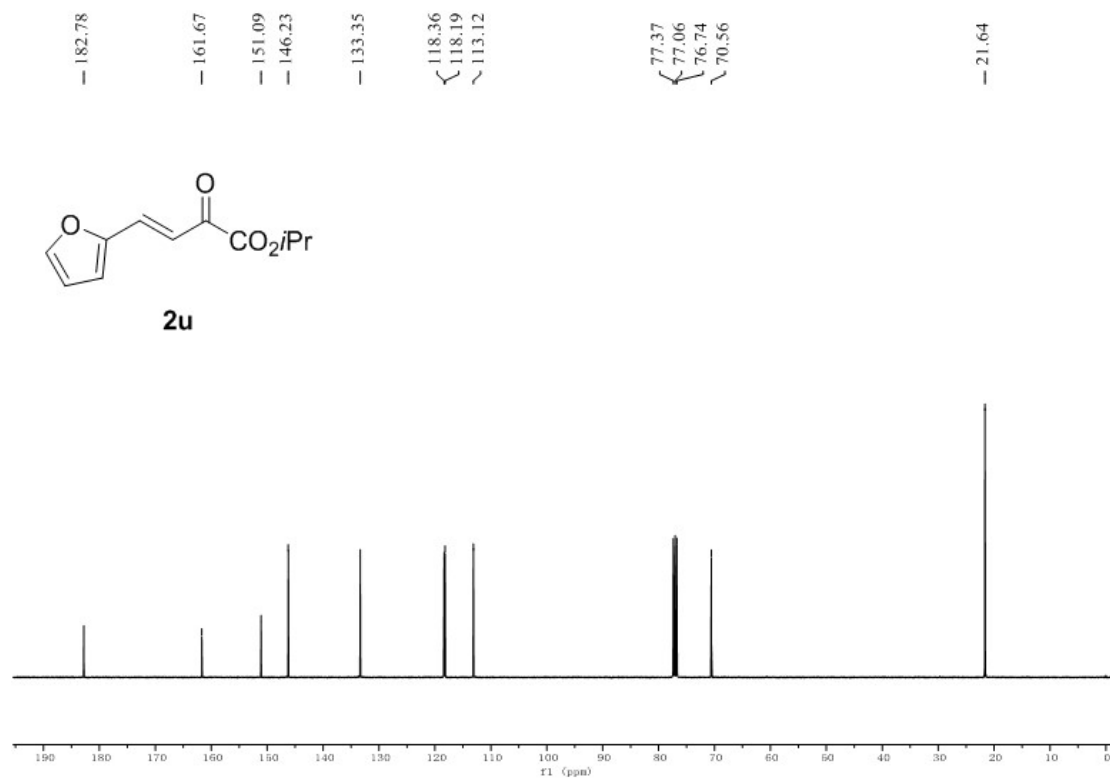

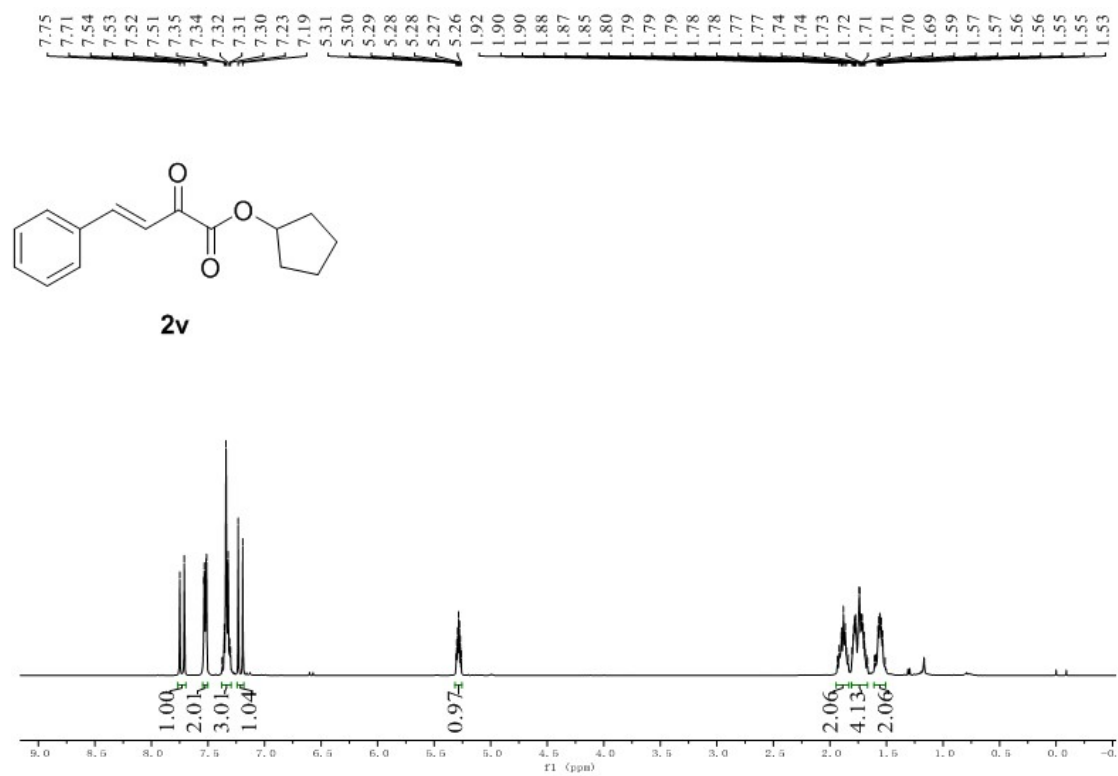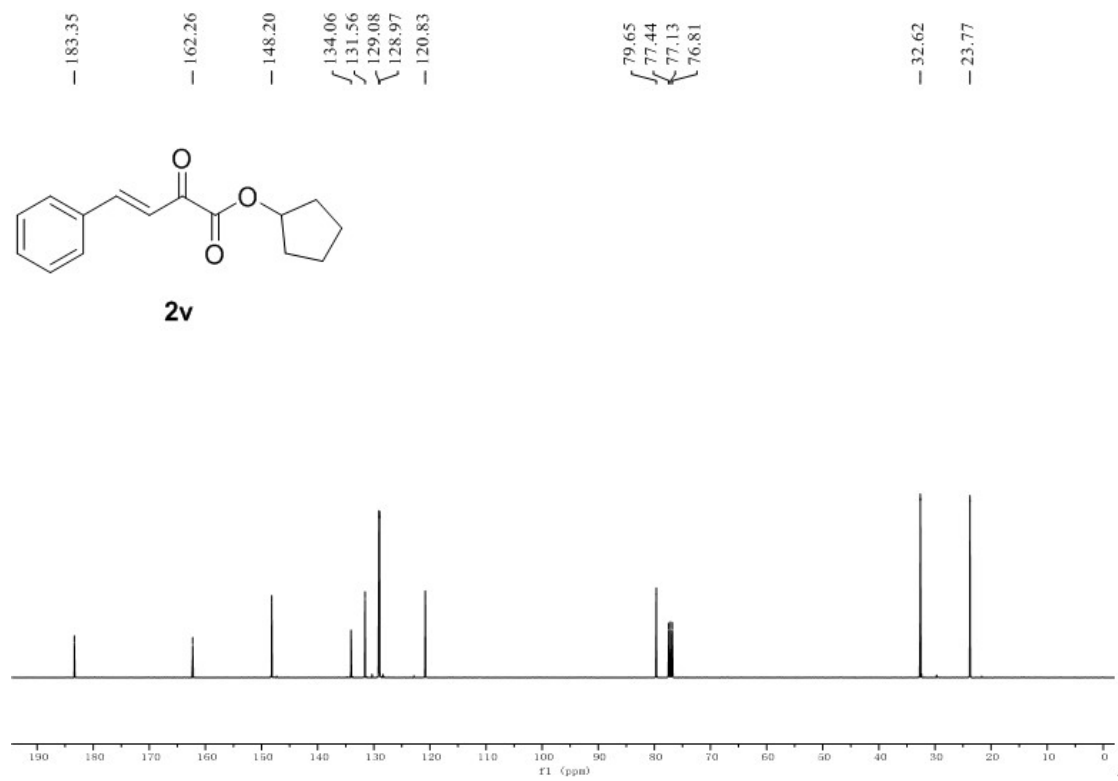



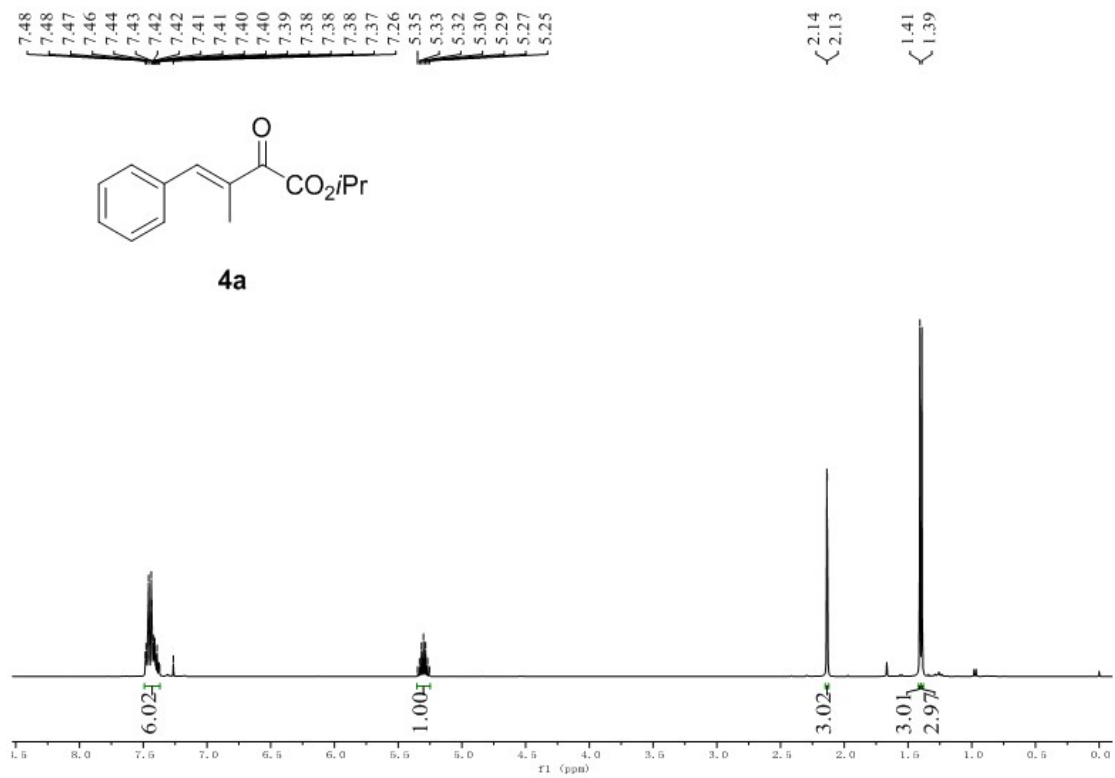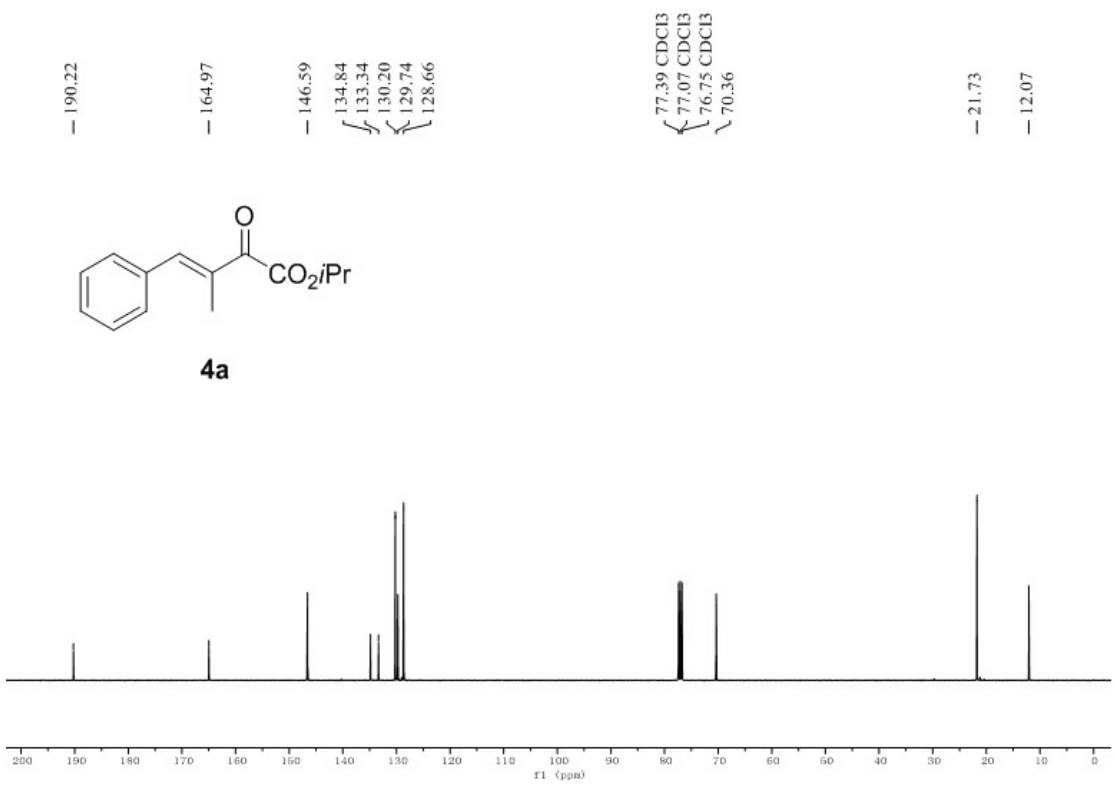

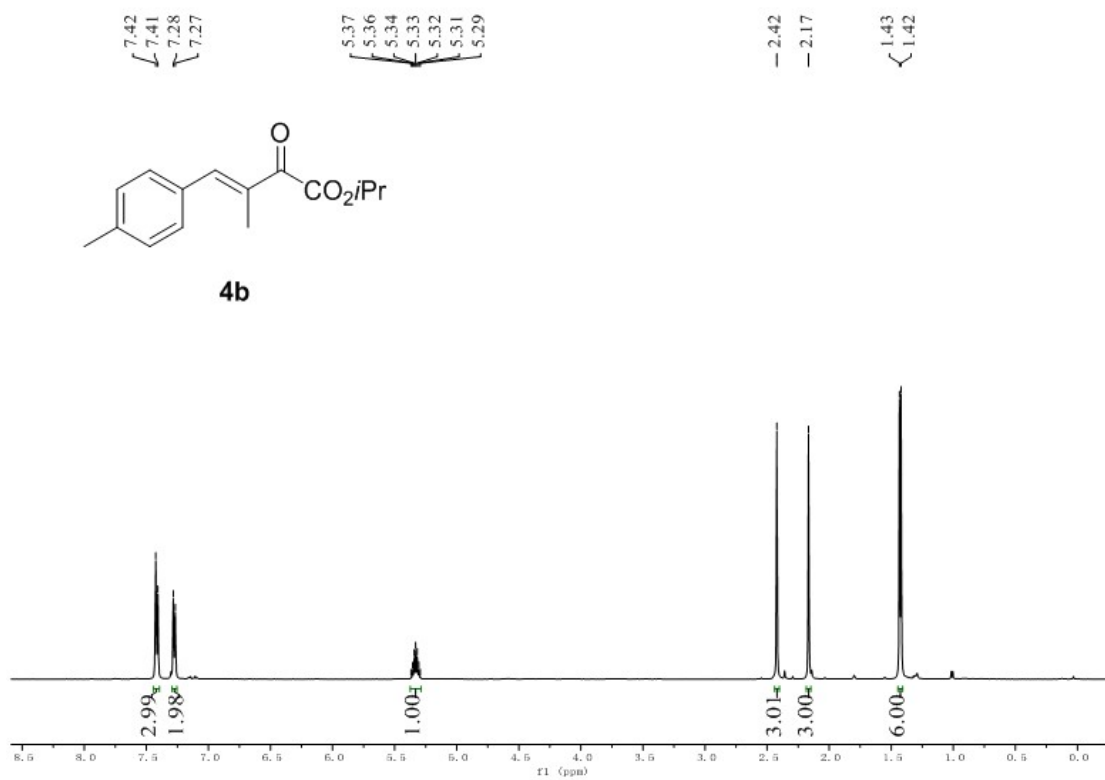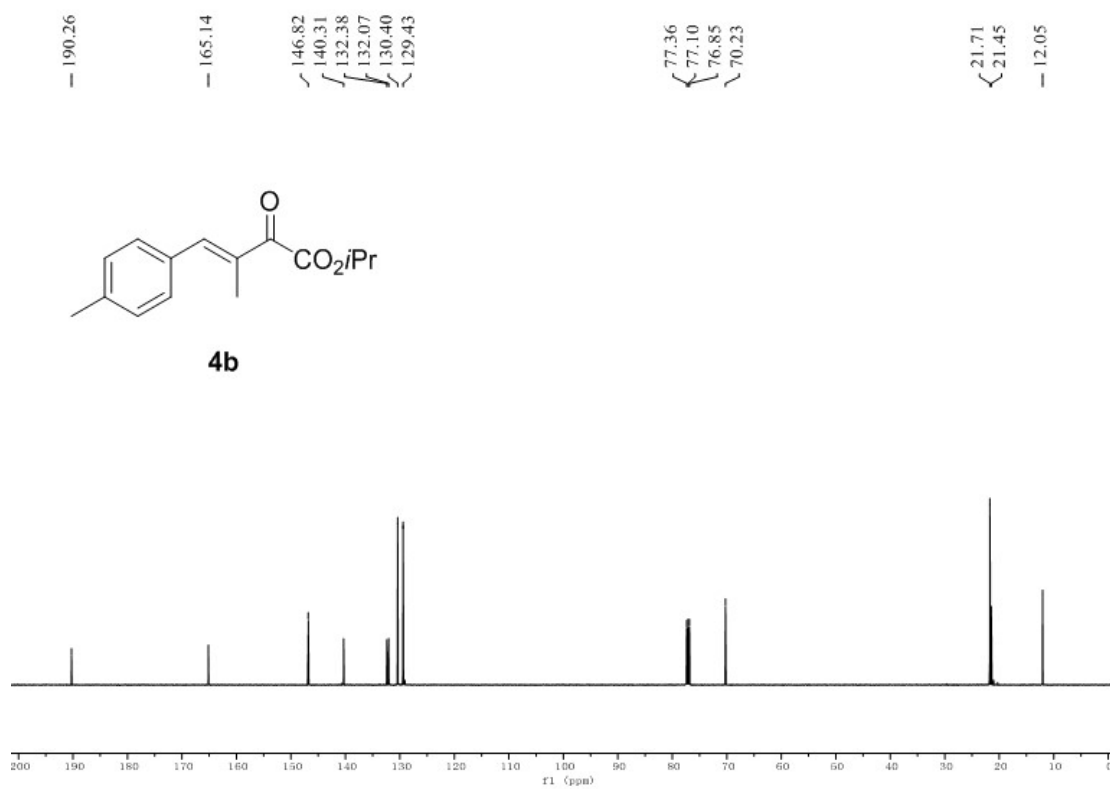

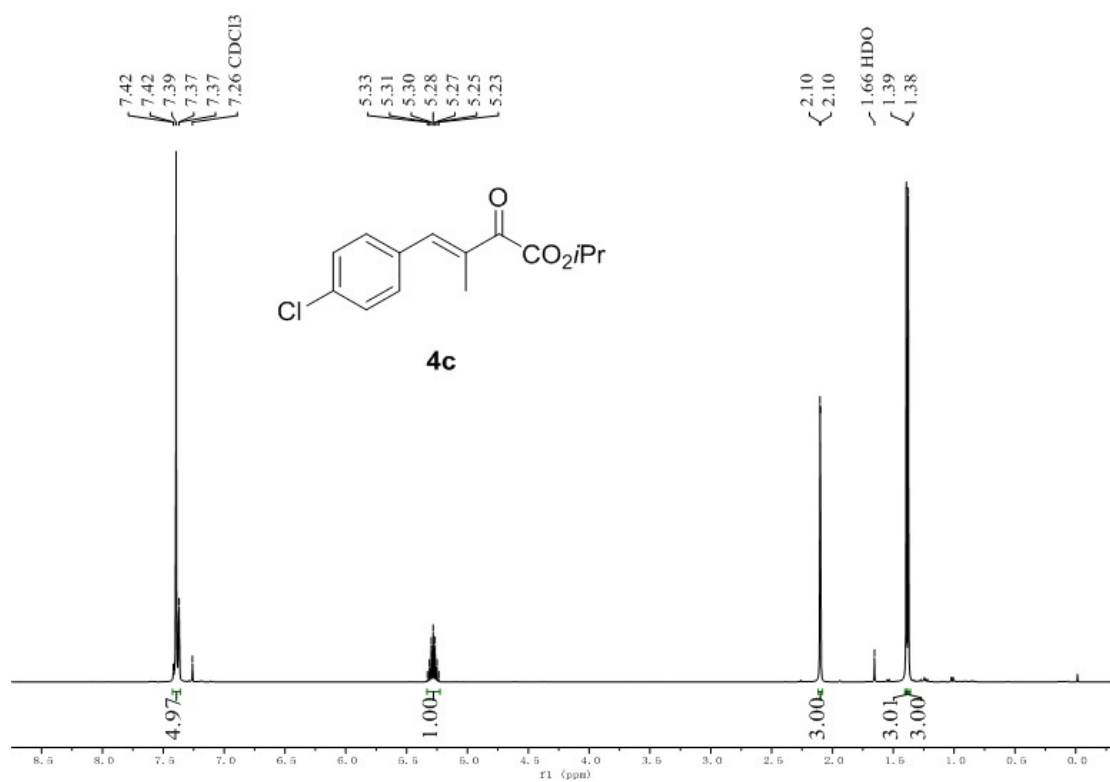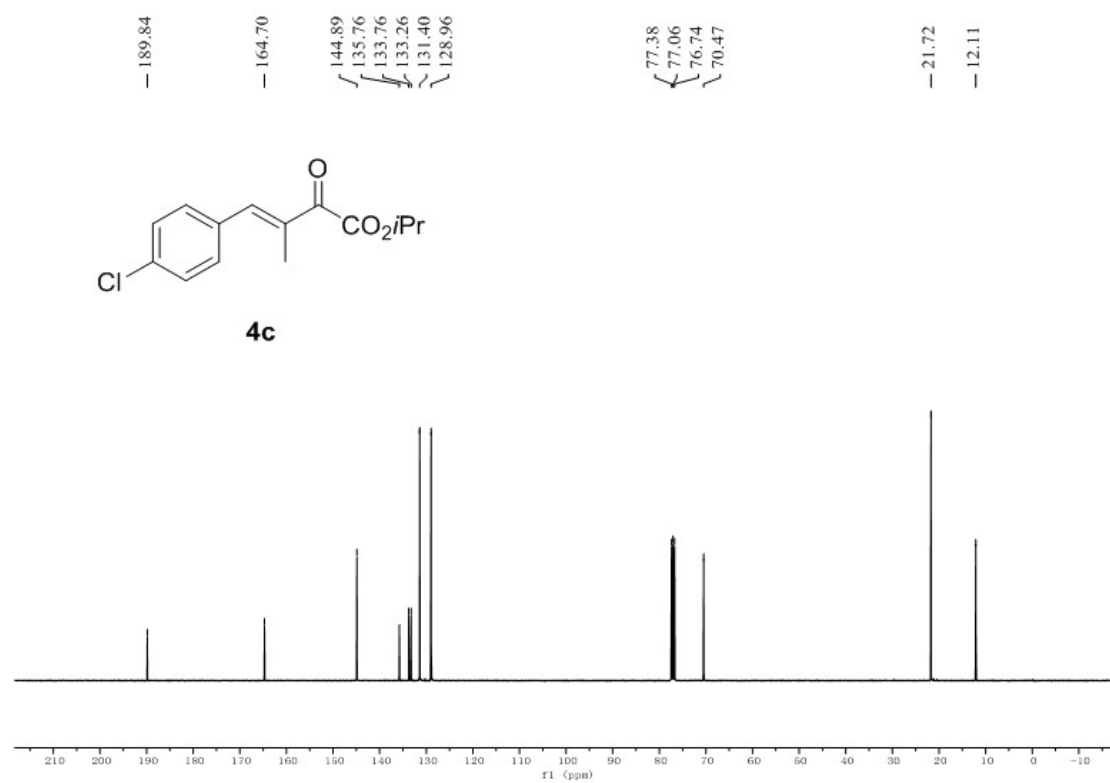

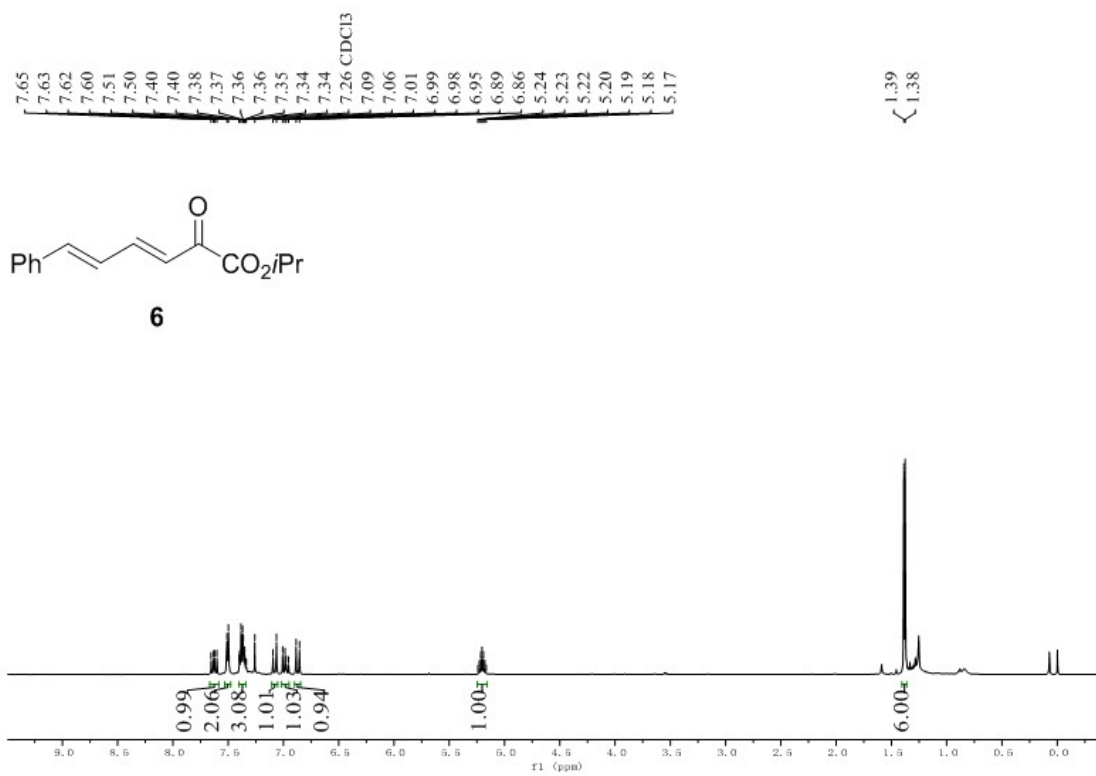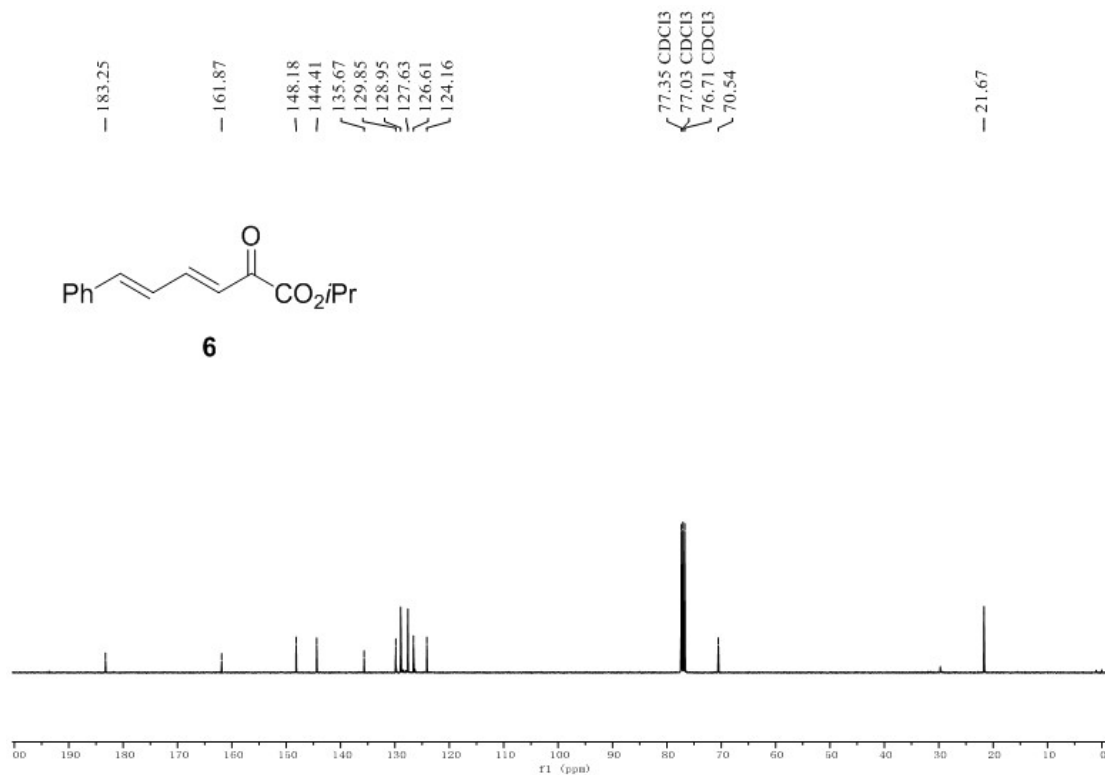

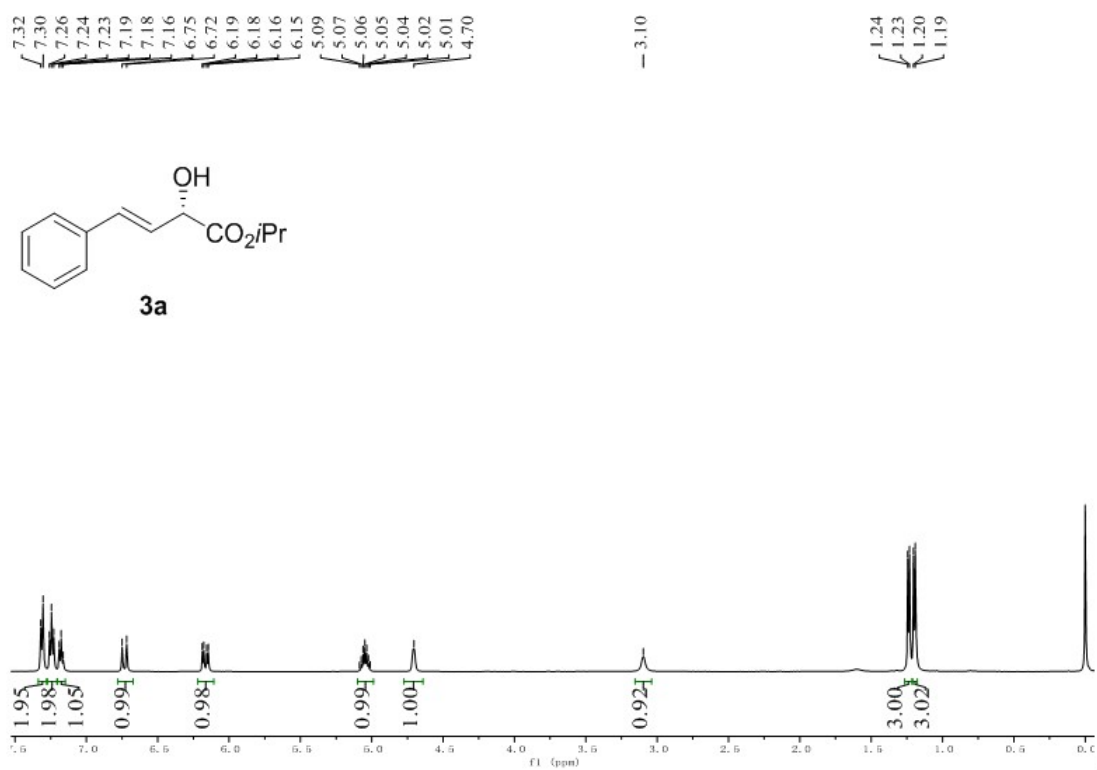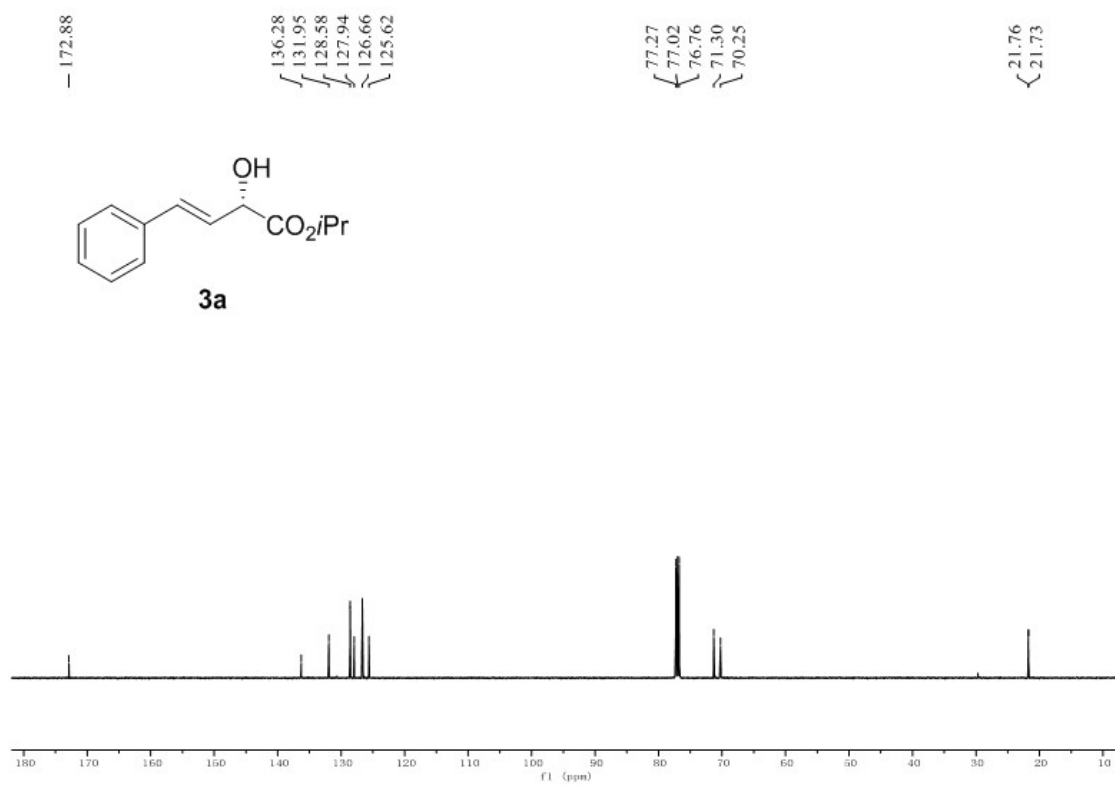

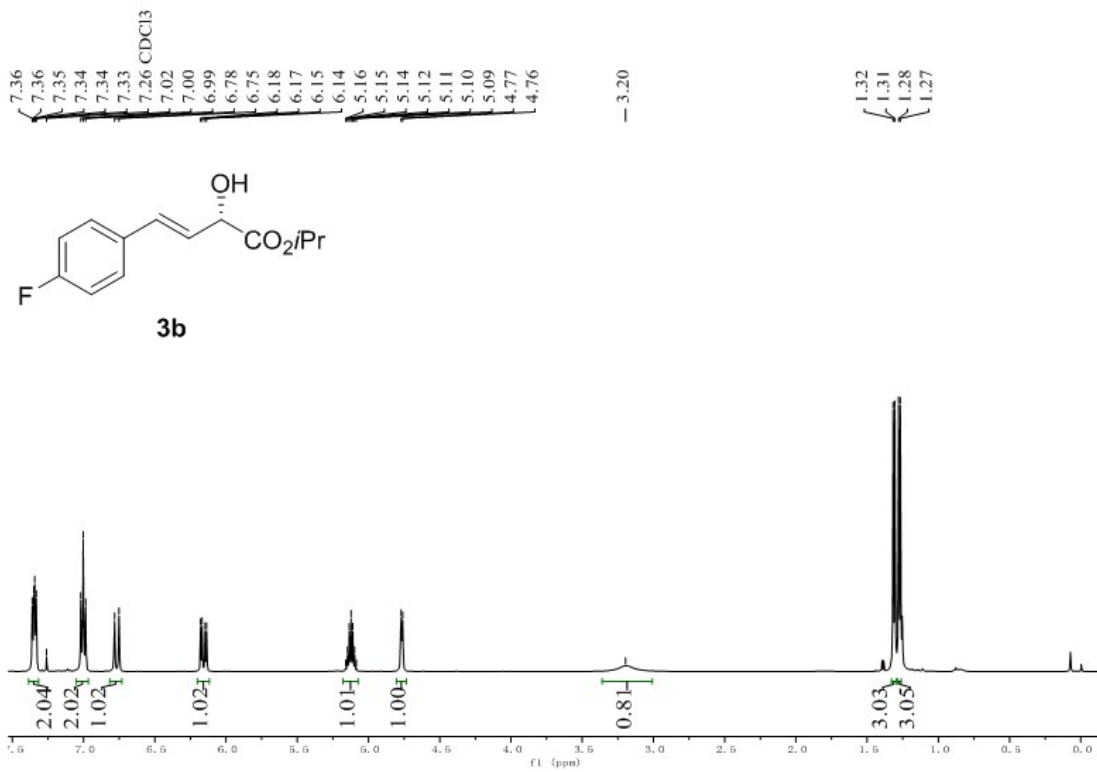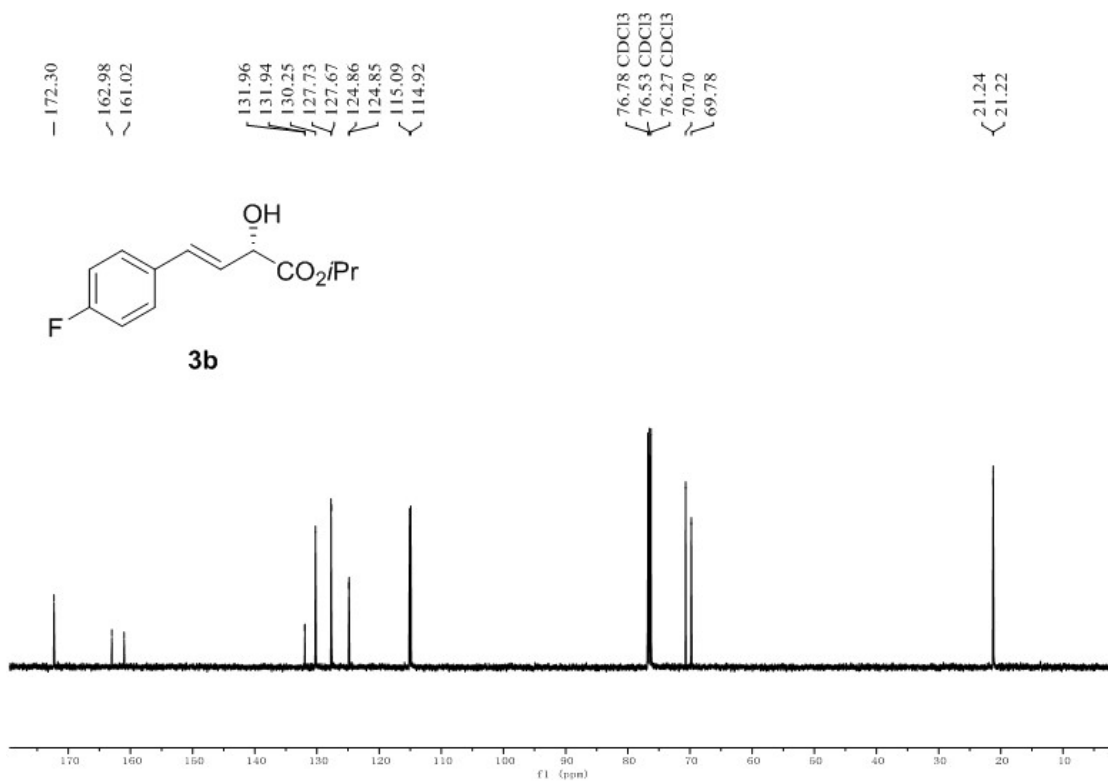

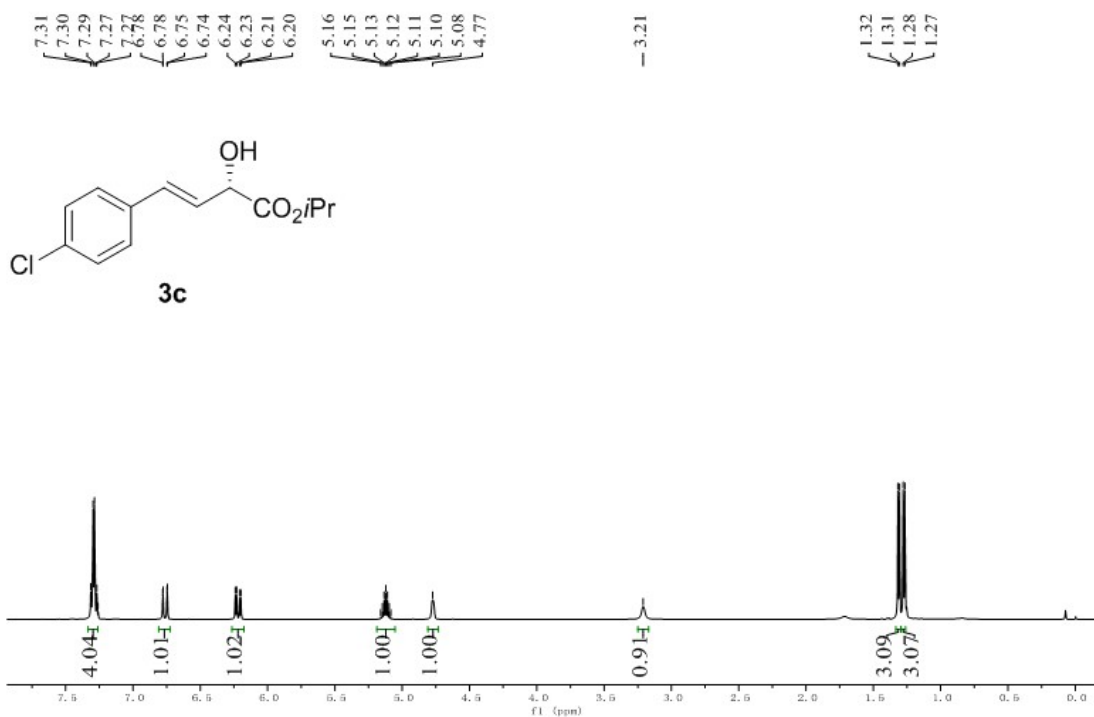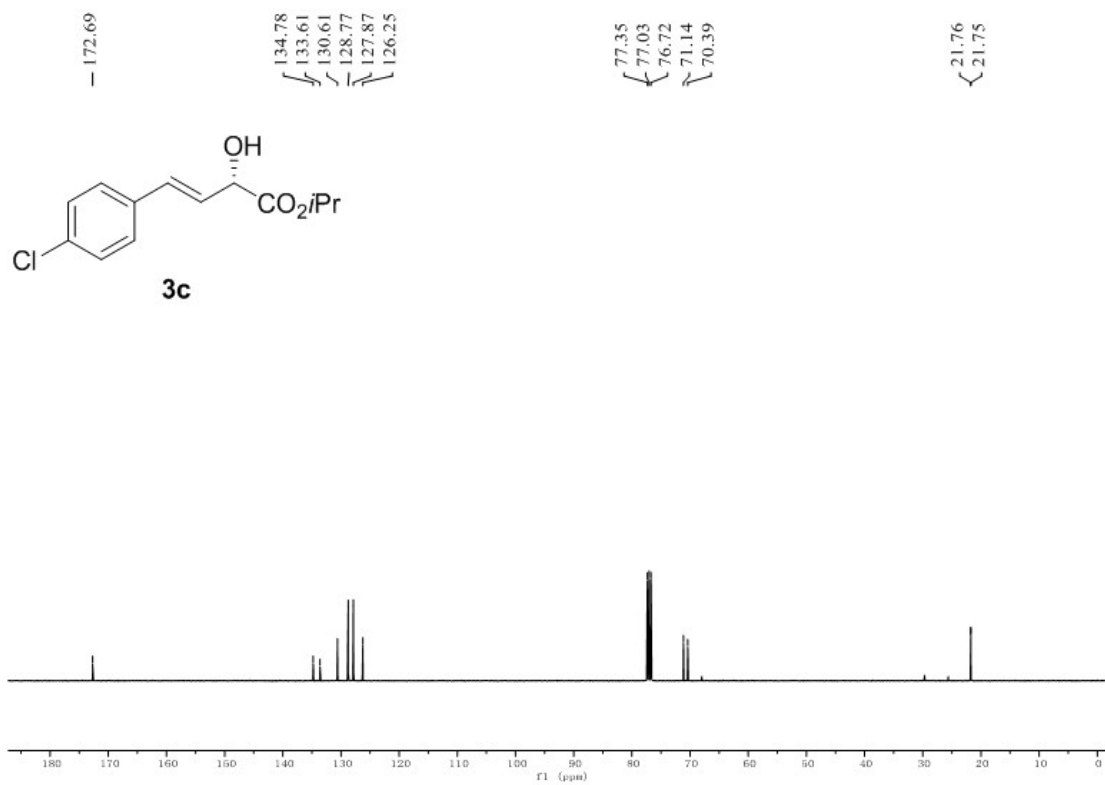

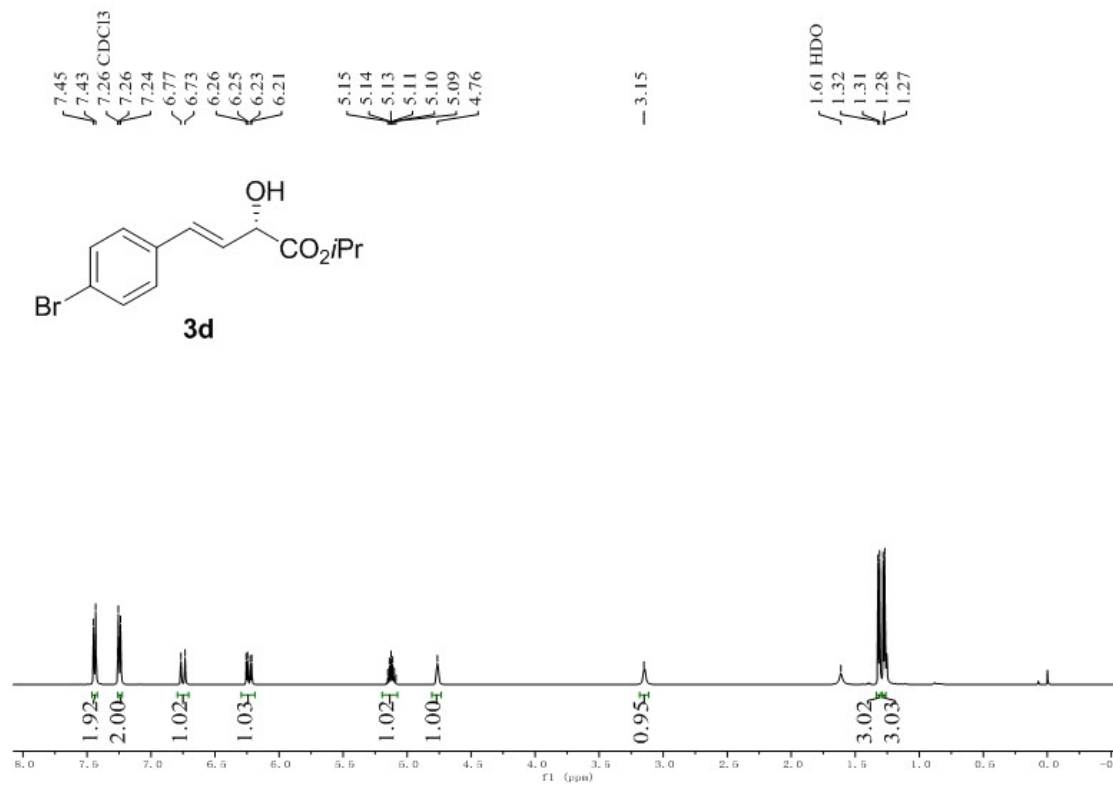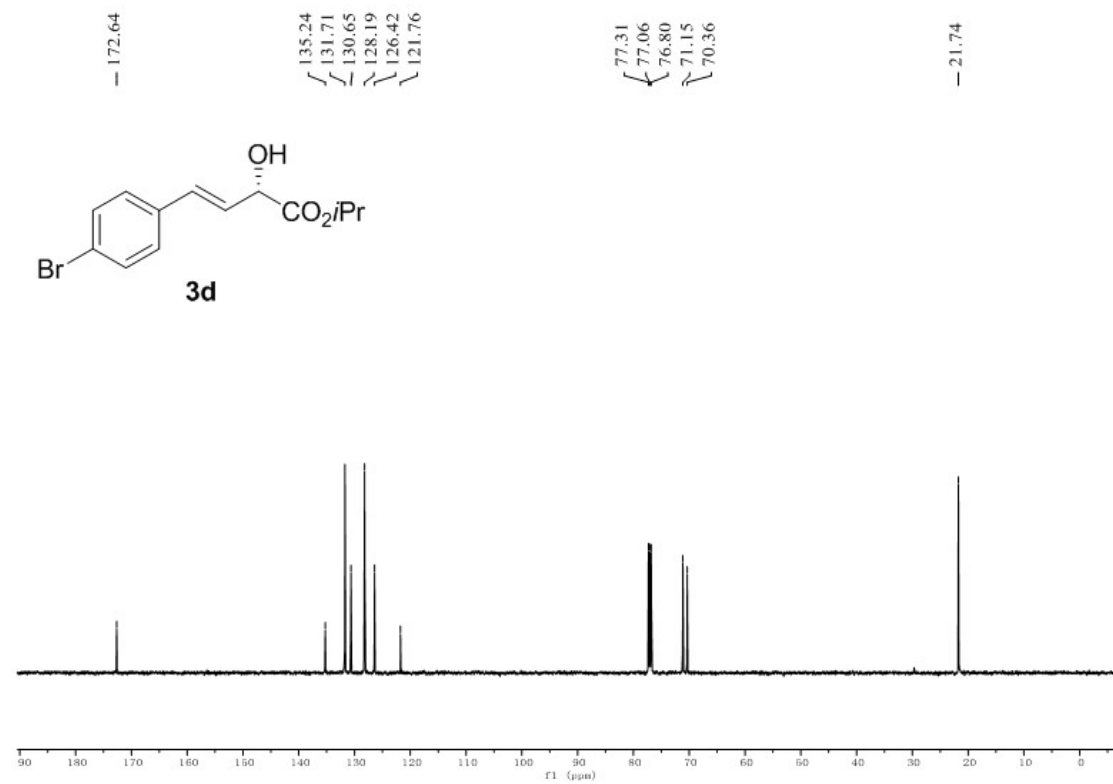



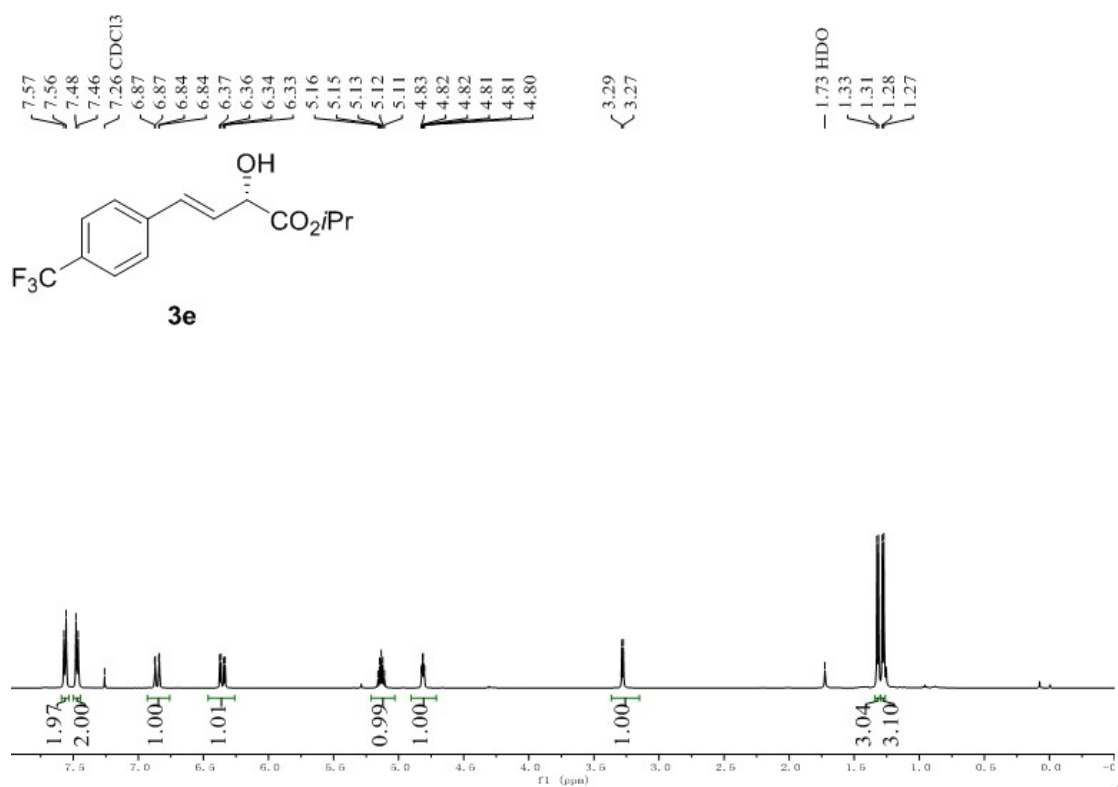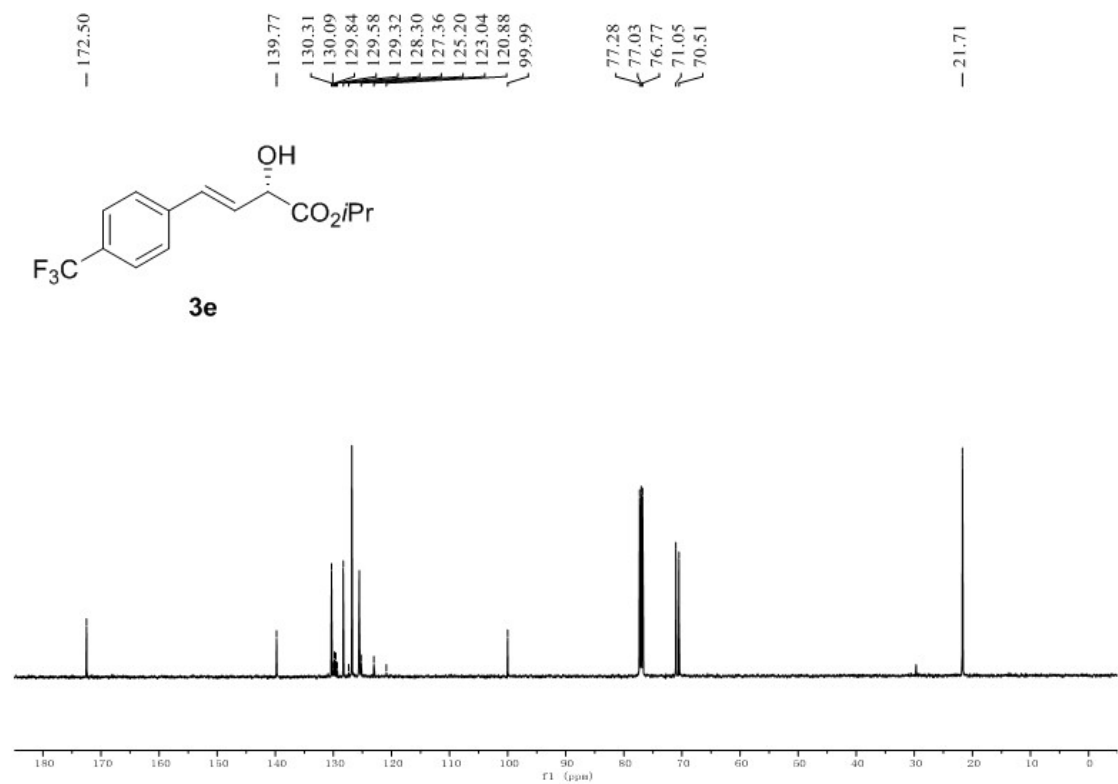

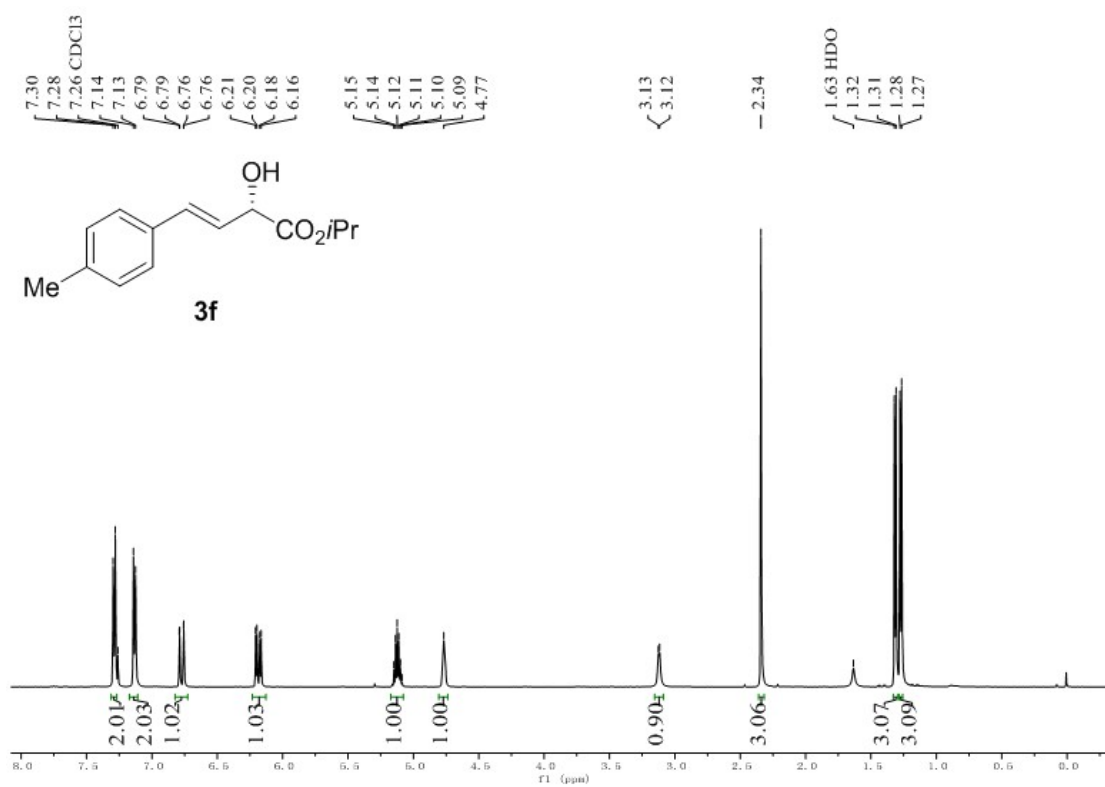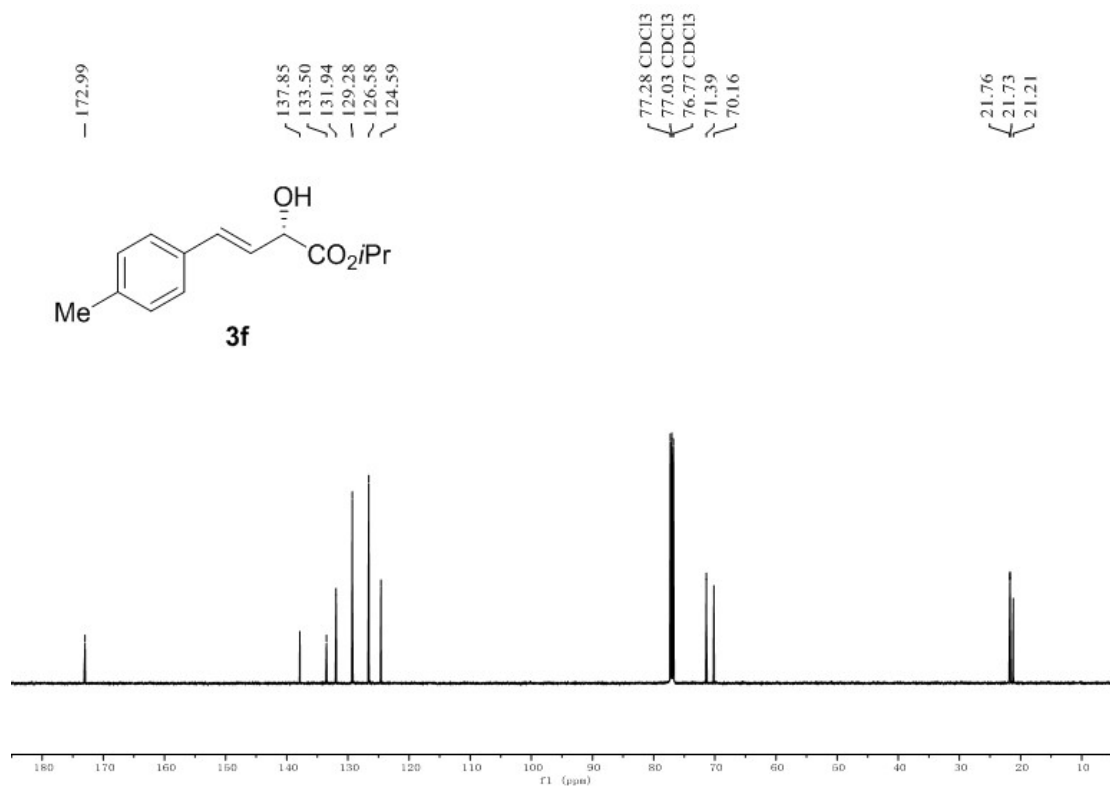

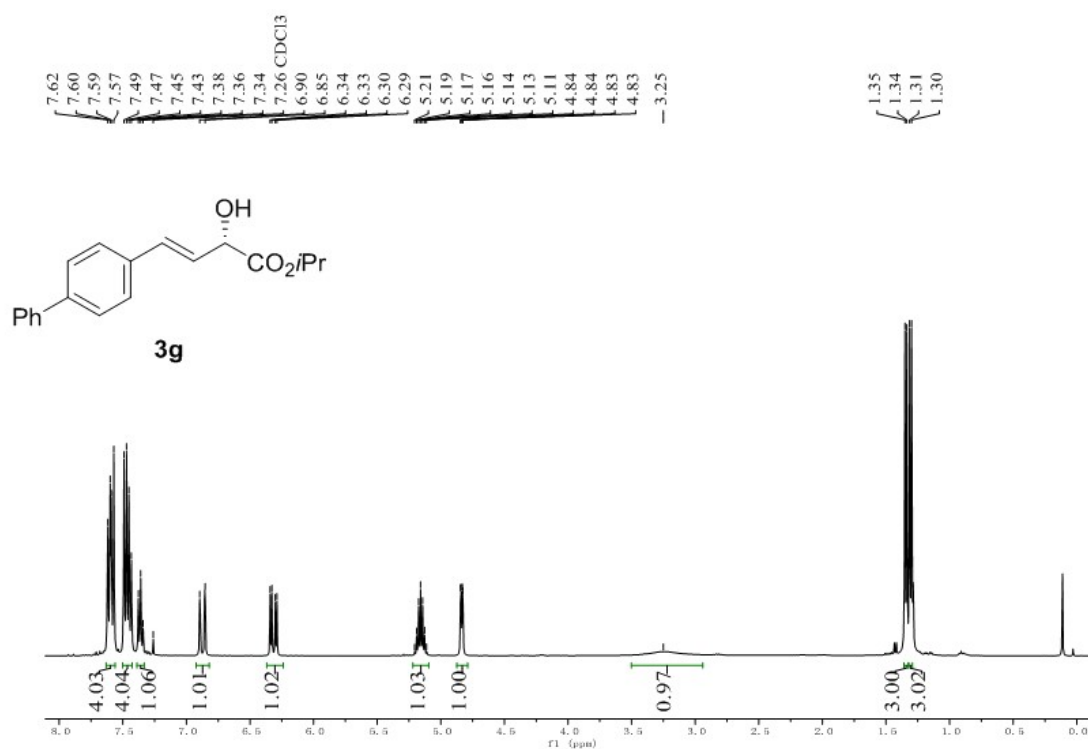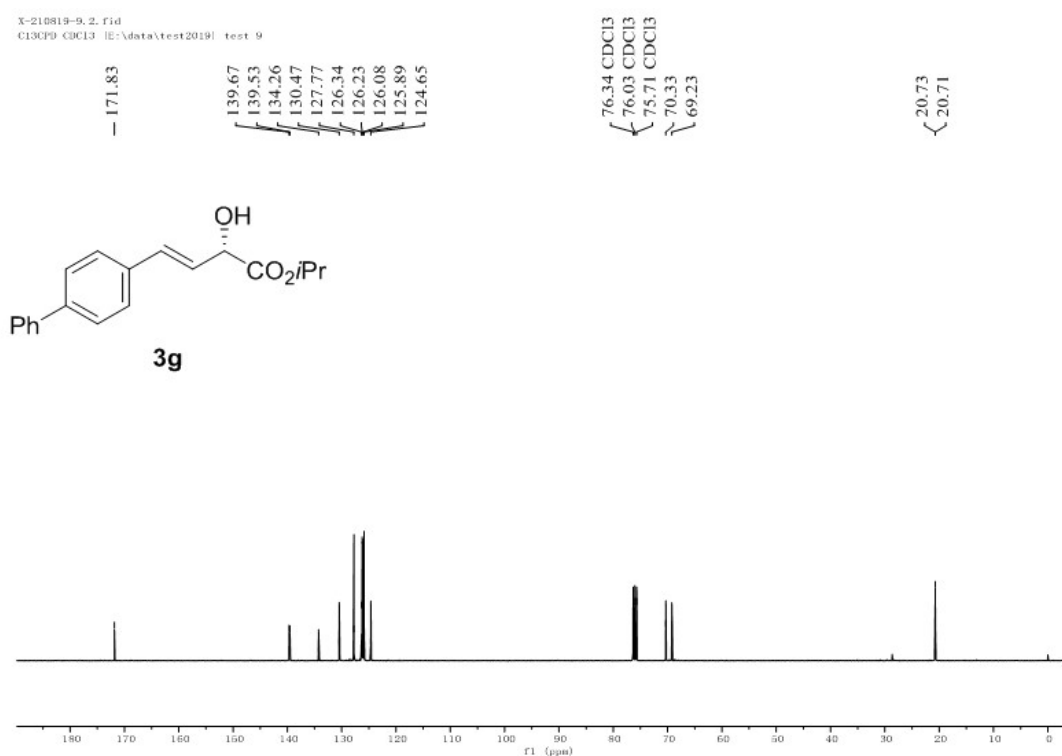

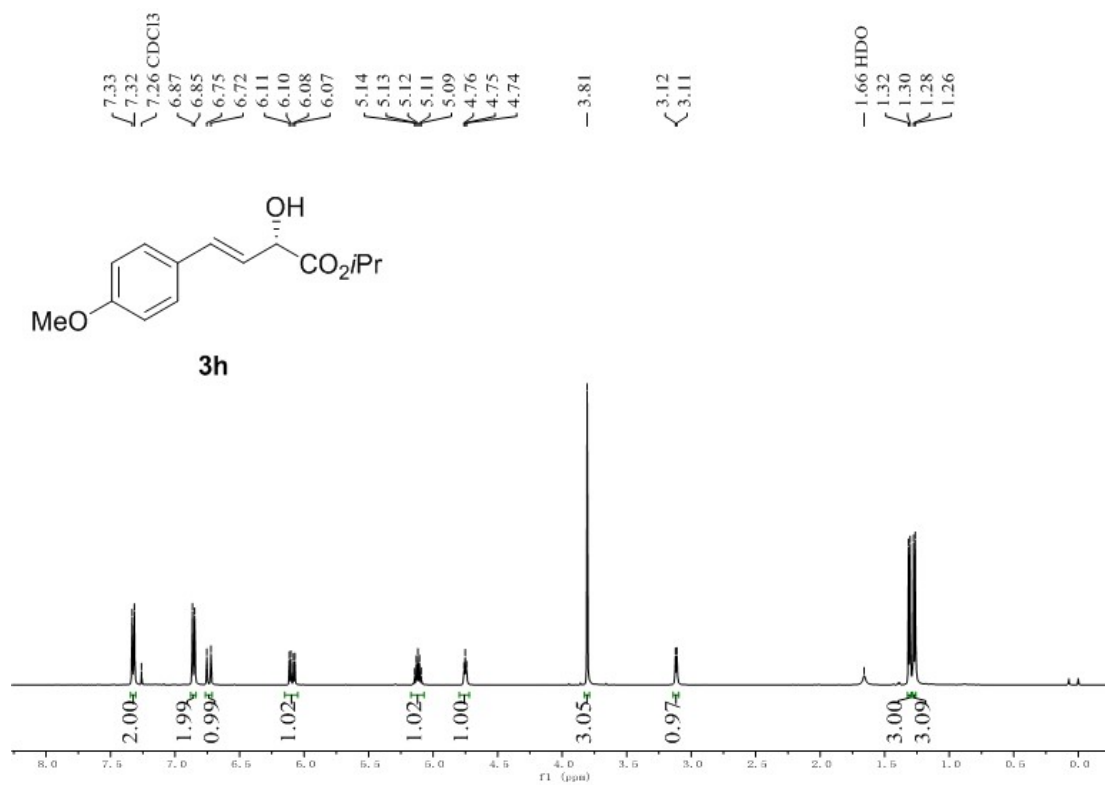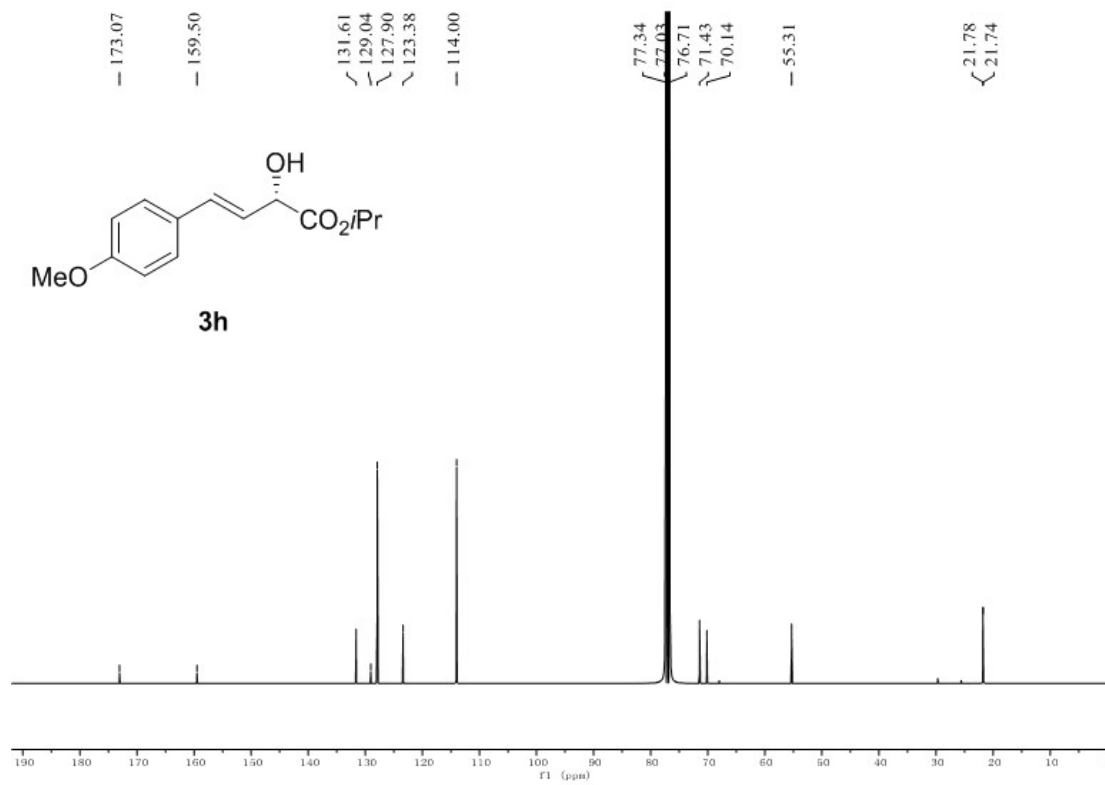

7.23  
7.21  
7.21  
7.19  
7.17  
7.07  
7.05  
7.02  
7.02  
7.01  
7.00  
6.99  
6.99  
6.89  
6.89  
6.89  
6.89  
6.87  
6.87  
6.85  
6.85  
6.84  
6.73  
6.73  
6.69  
6.69  
6.21  
6.20  
6.20  
6.17  
6.16  
5.10  
5.08  
5.07  
5.05  
5.04  
5.02  
5.01  
4.71  
3.17  
3.16  
1.25  
1.23  
1.21  
1.20

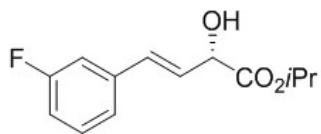

**3i**

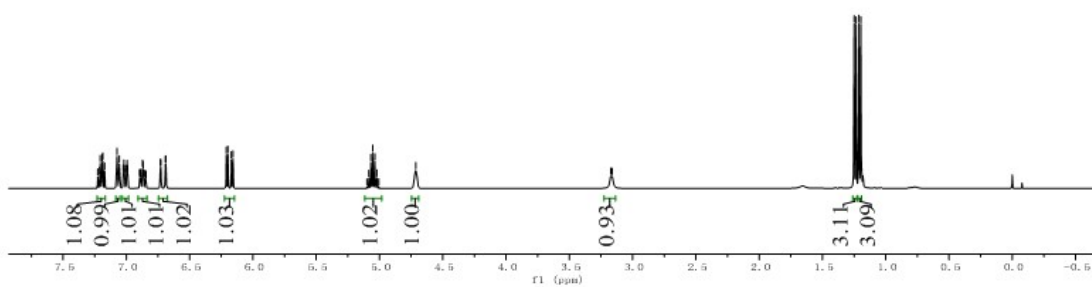

172.64  
164.27  
161.83  
138.67  
138.59  
130.66  
130.63  
130.09  
130.01  
127.03  
122.64  
122.61  
114.84  
114.62  
113.16  
112.94  
77.37 CDCl3  
77.05 CDCl3  
76.73 CDCl3  
71.07  
70.42  
21.75  
21.74

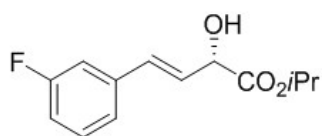

**3i**

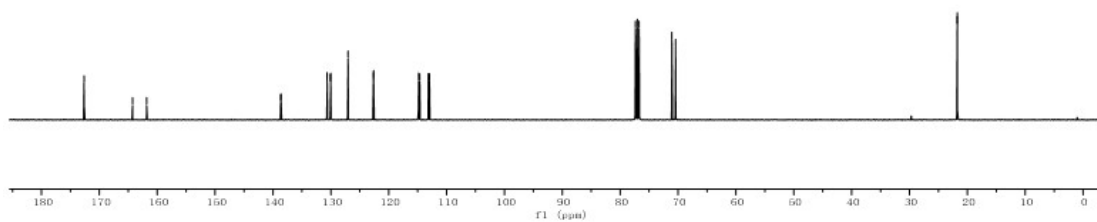

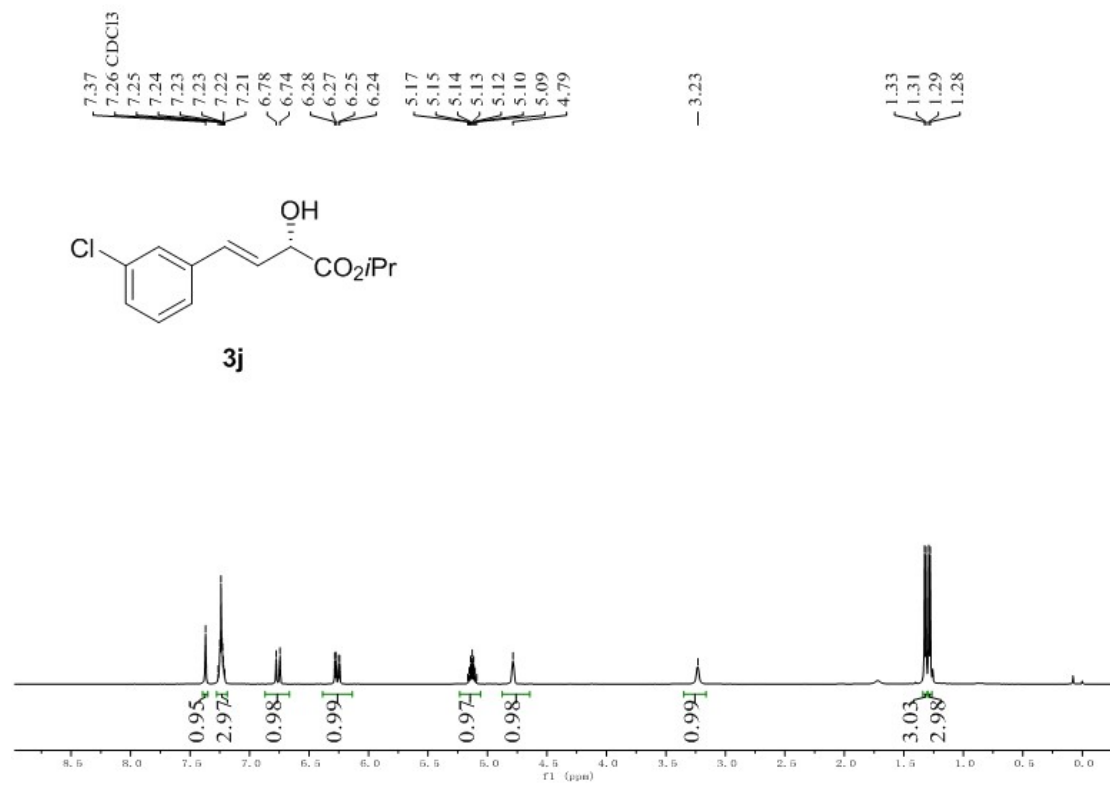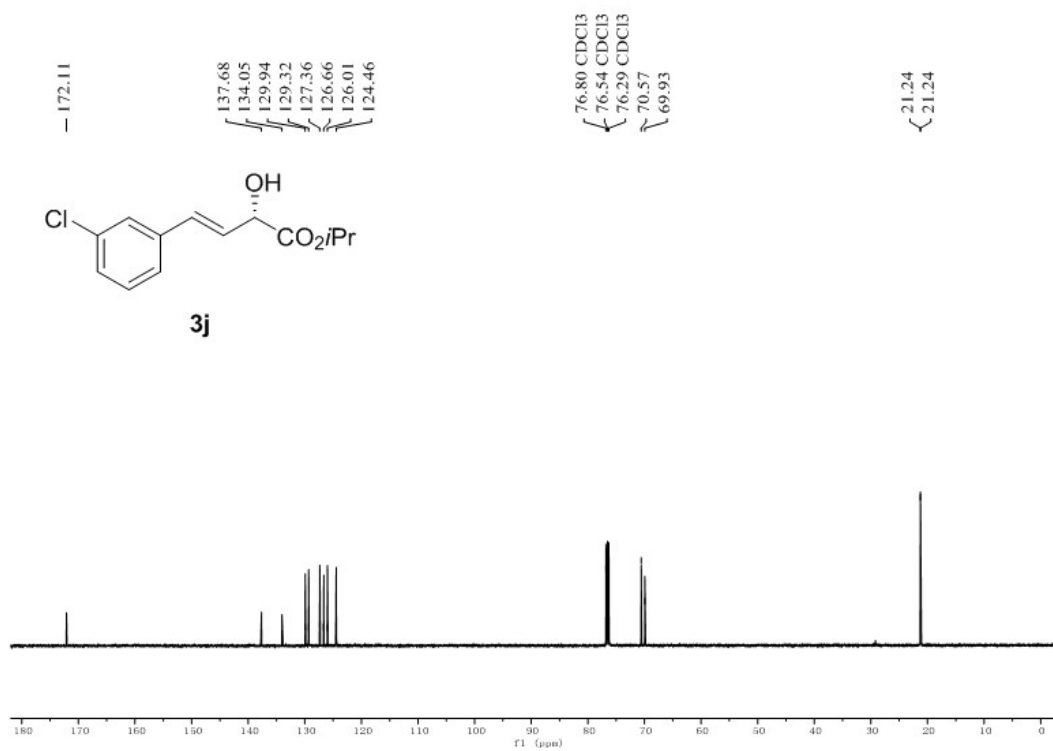

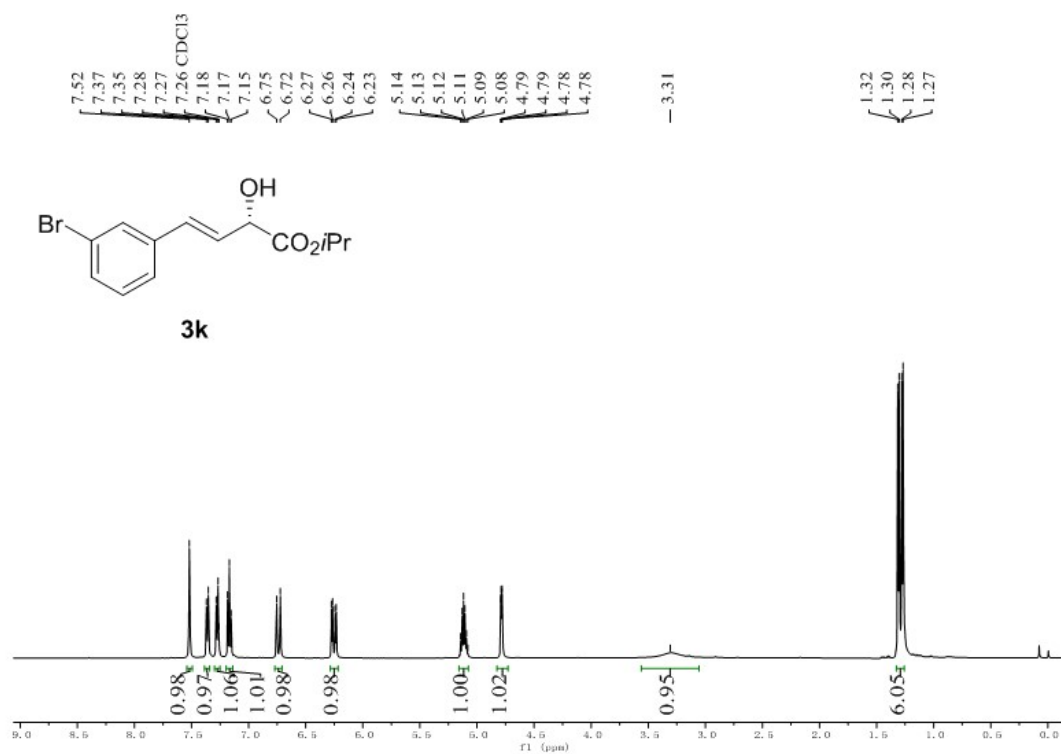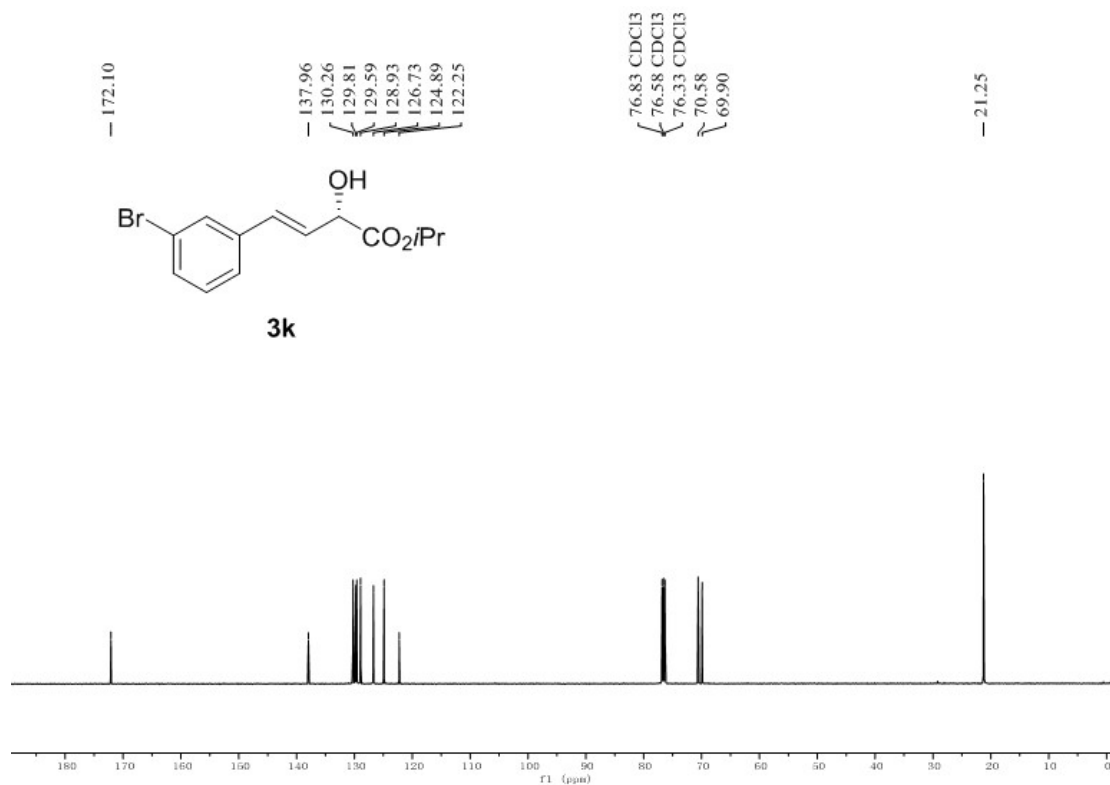

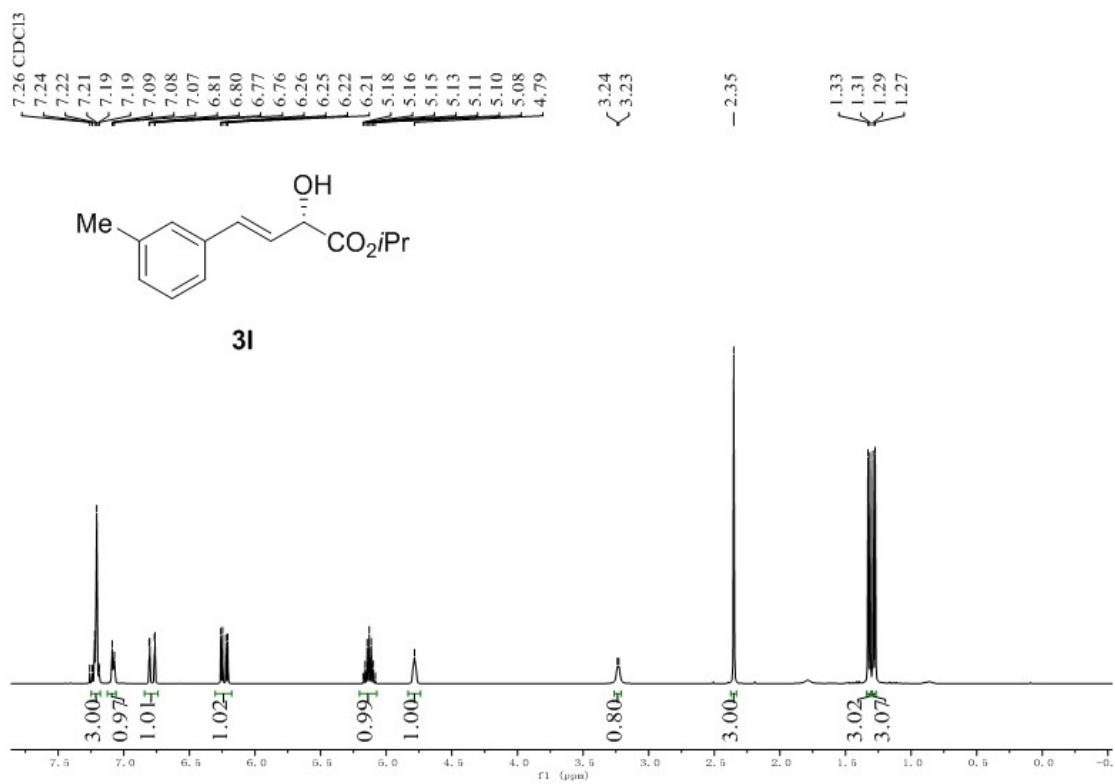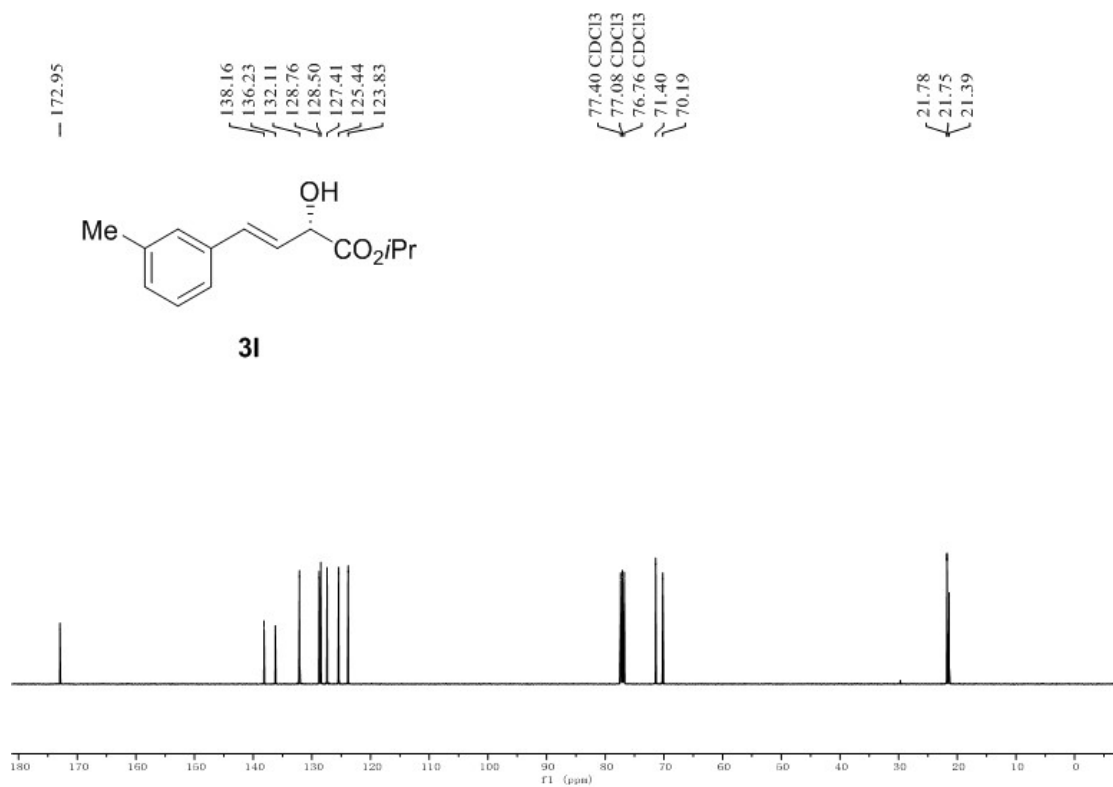



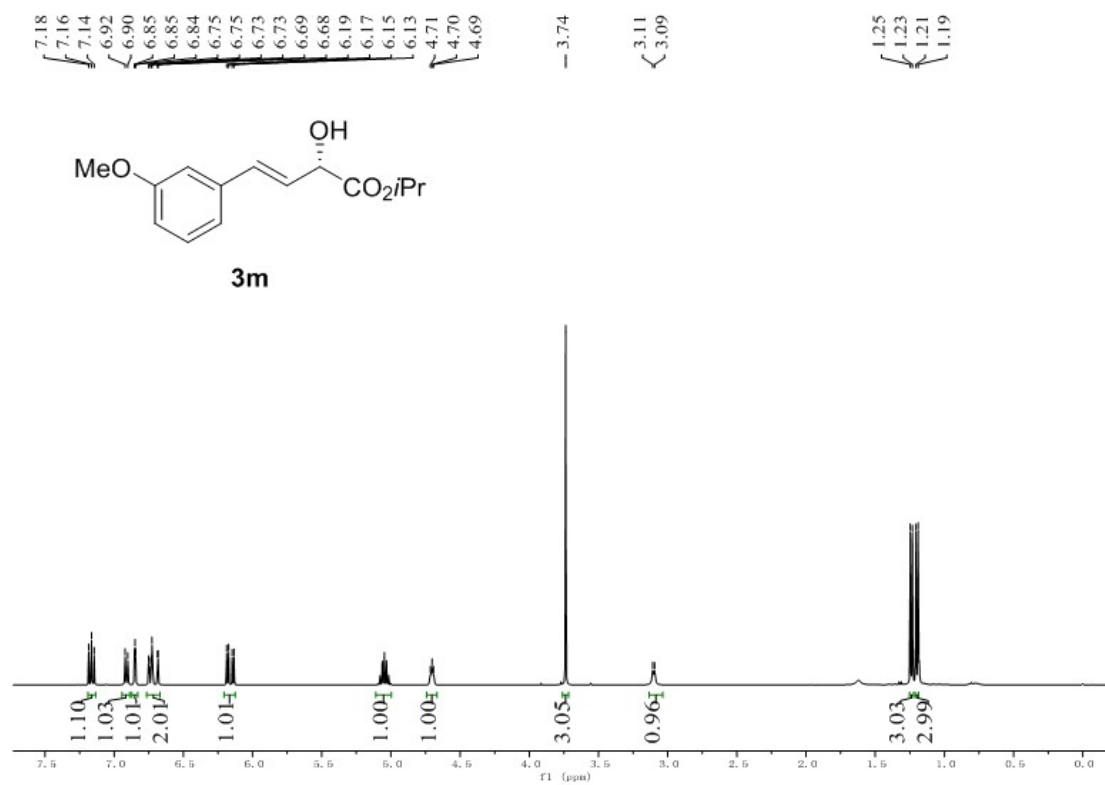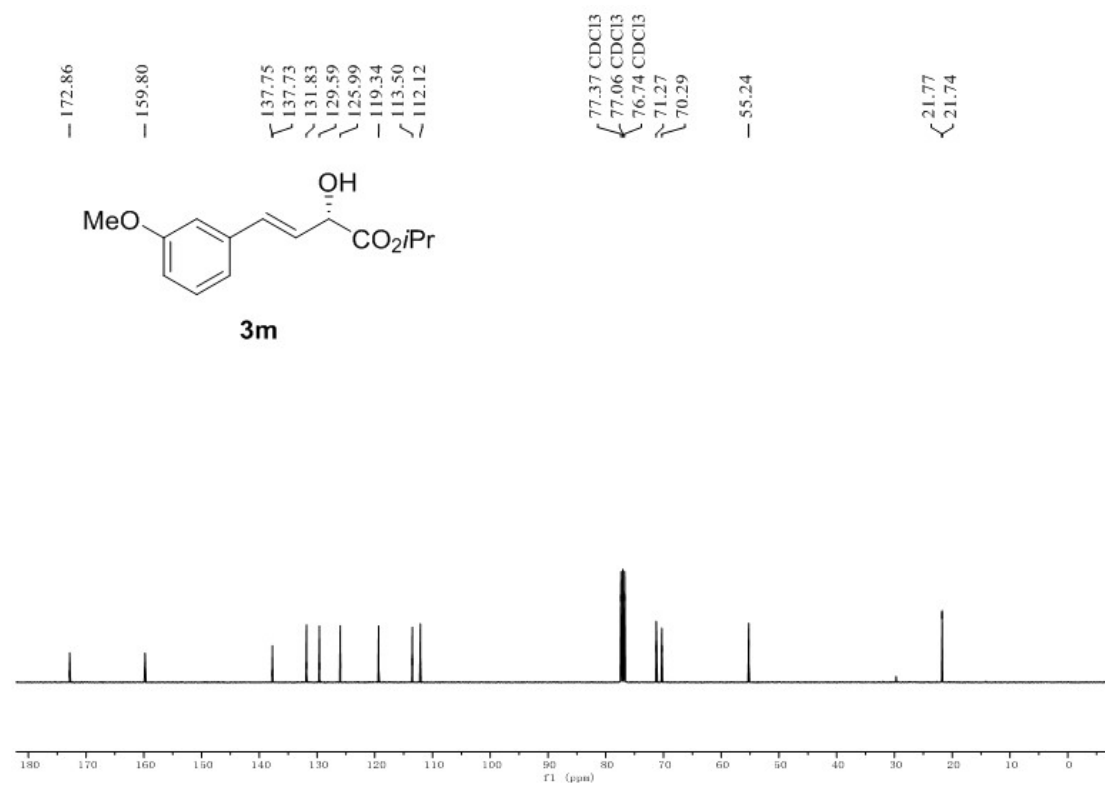

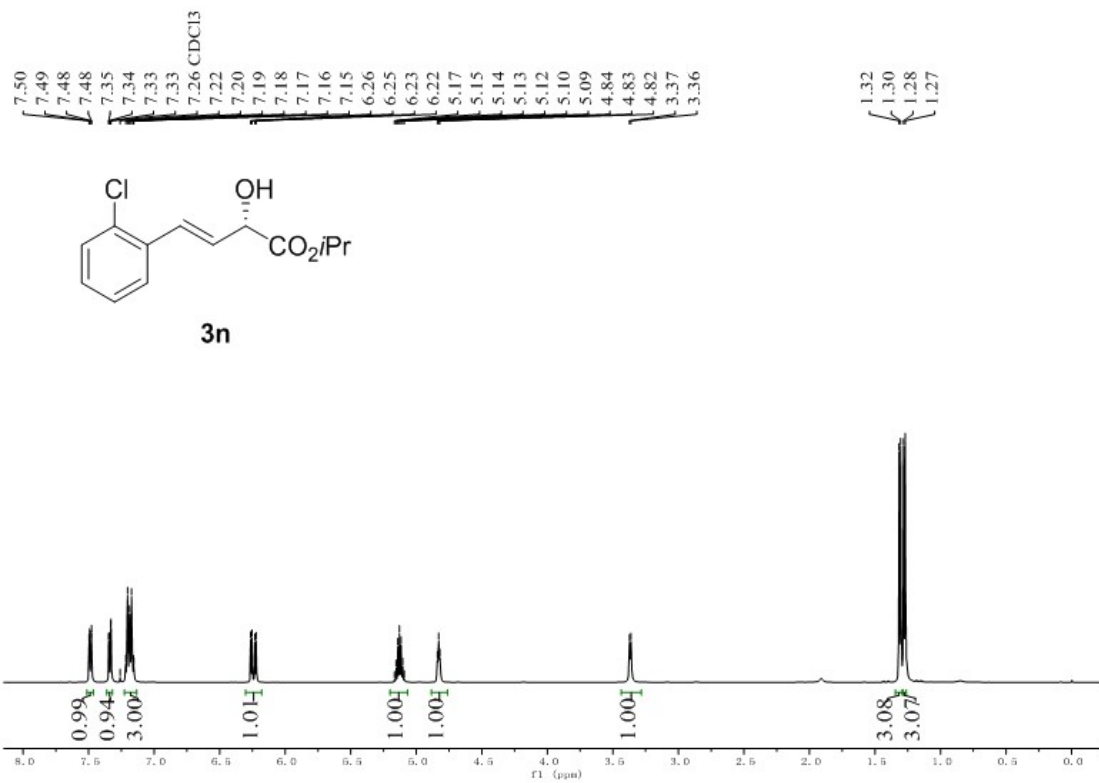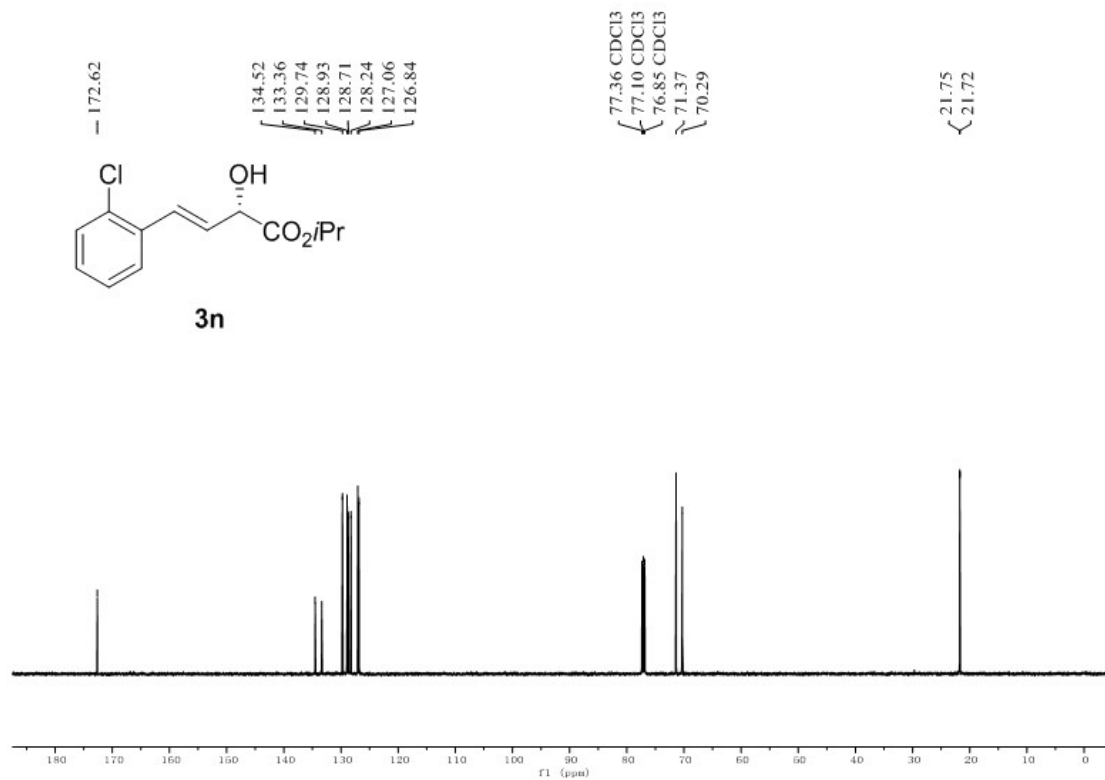

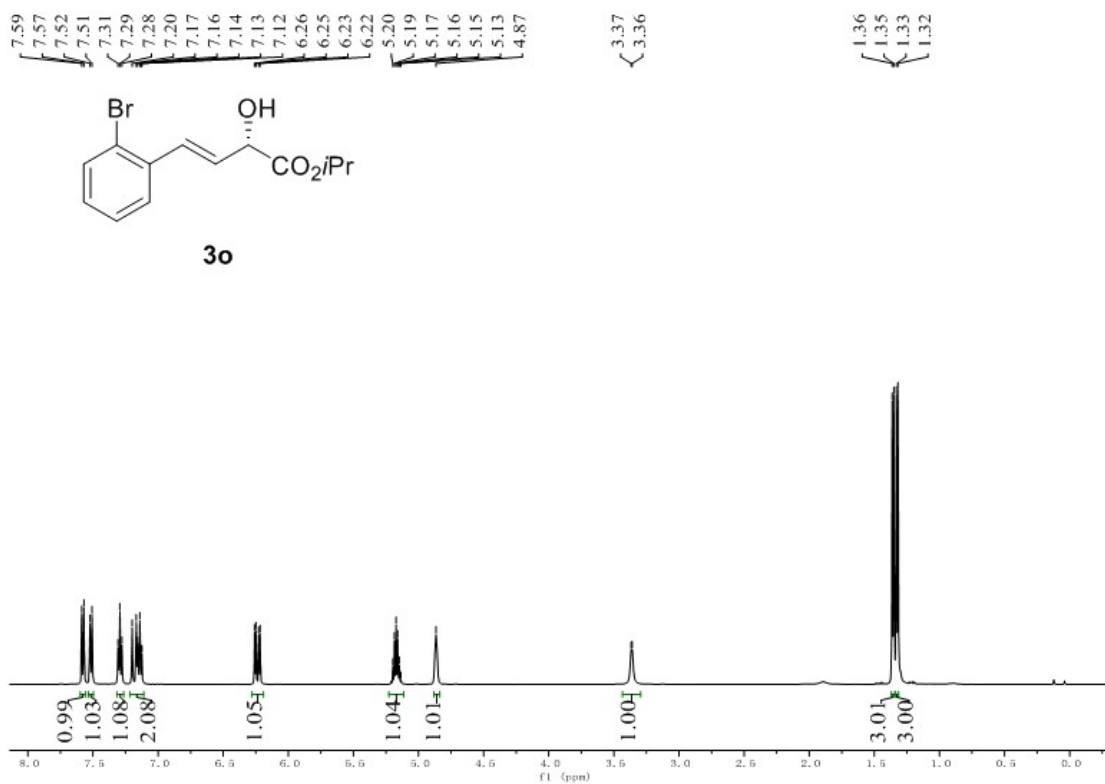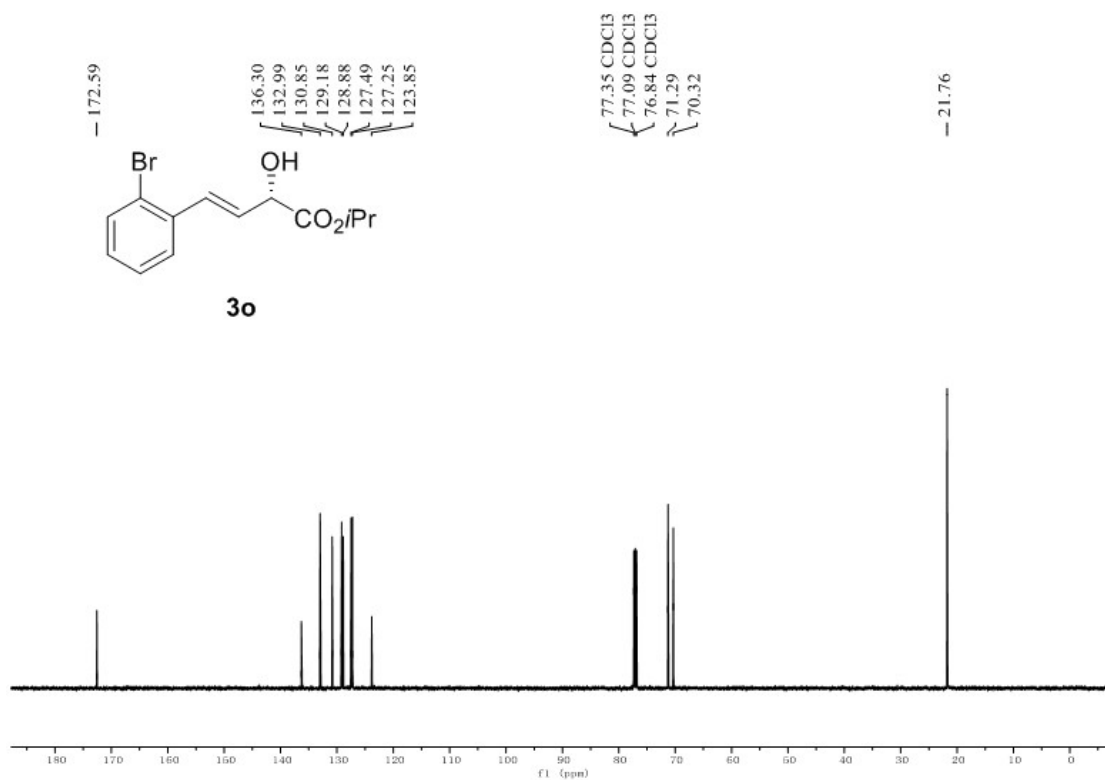

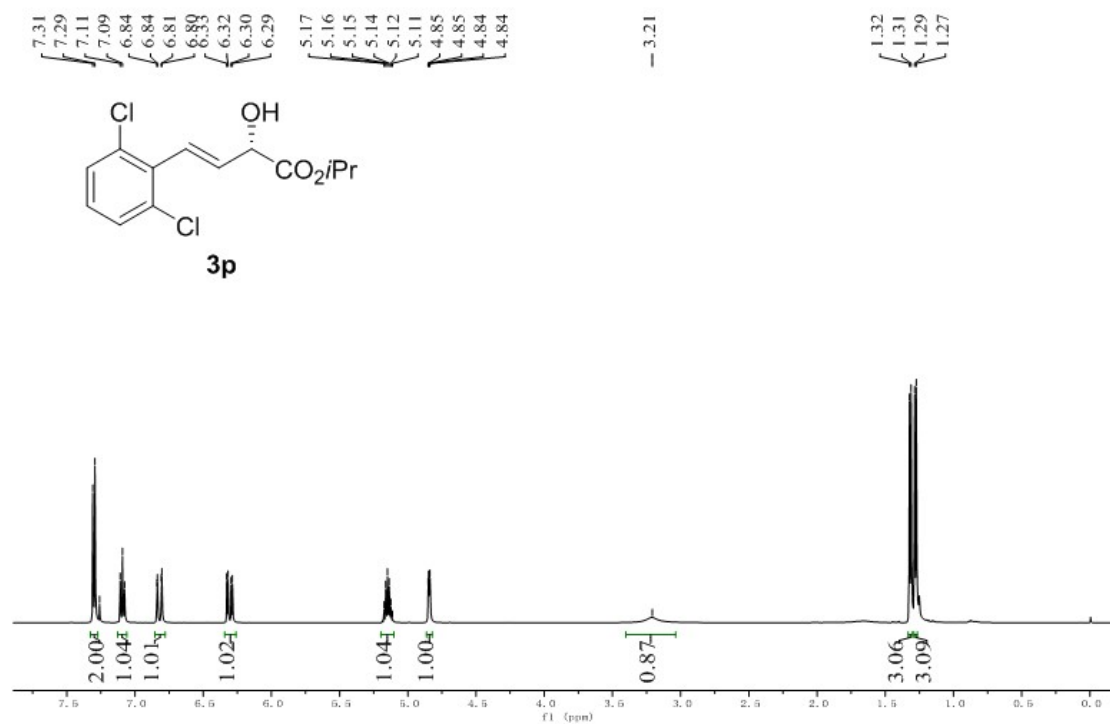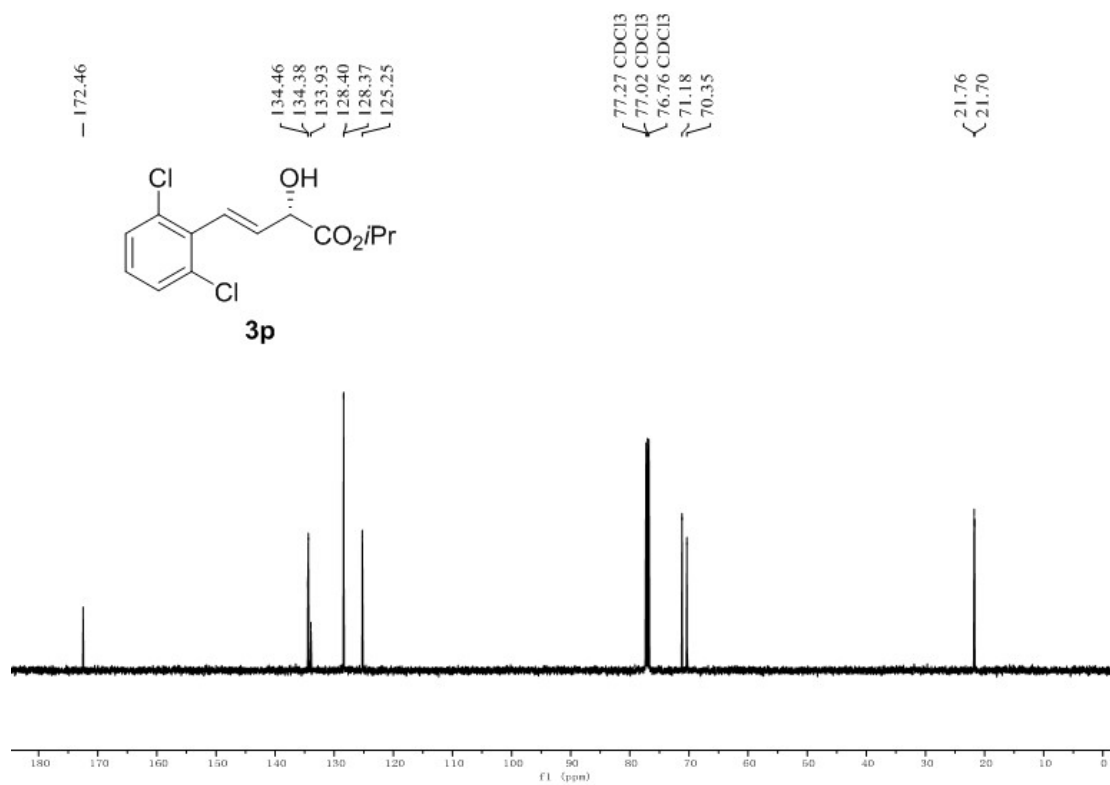

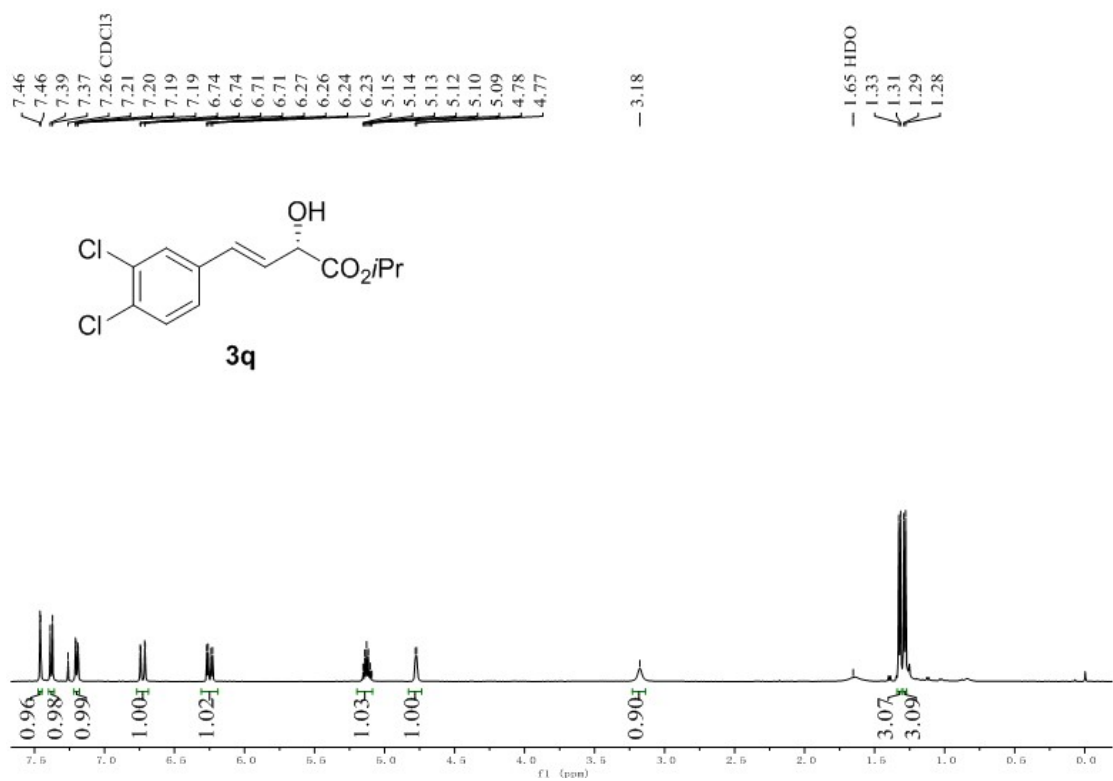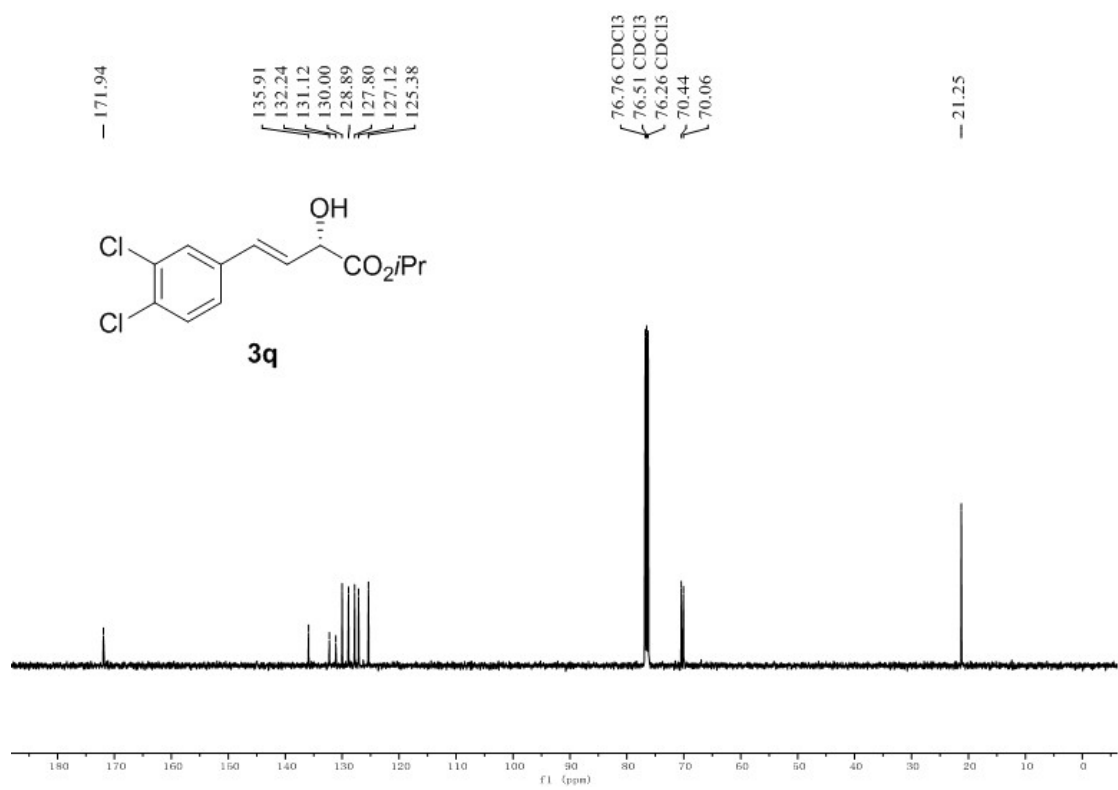

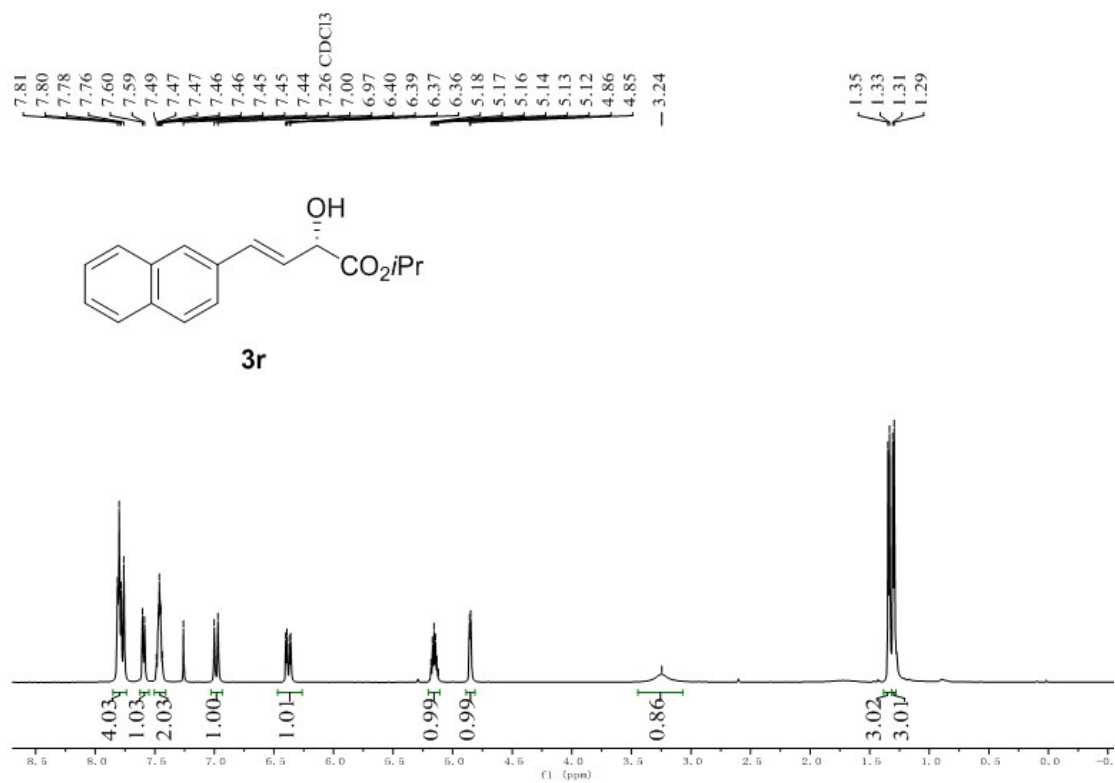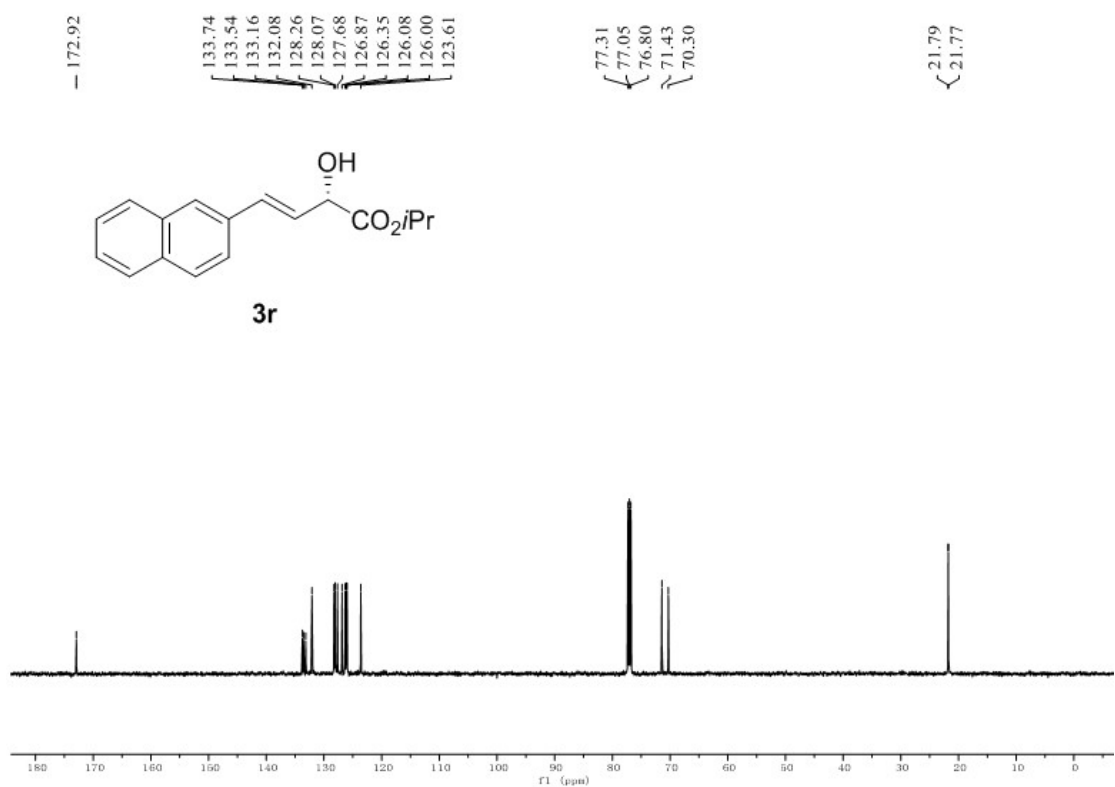

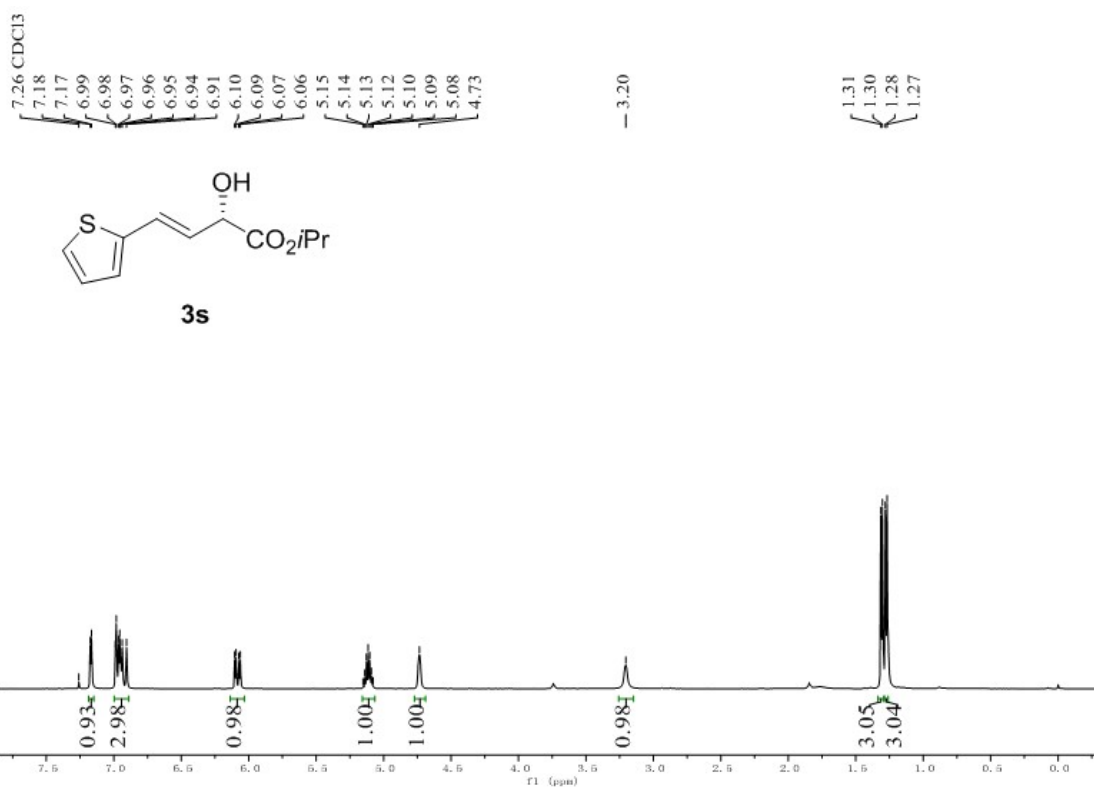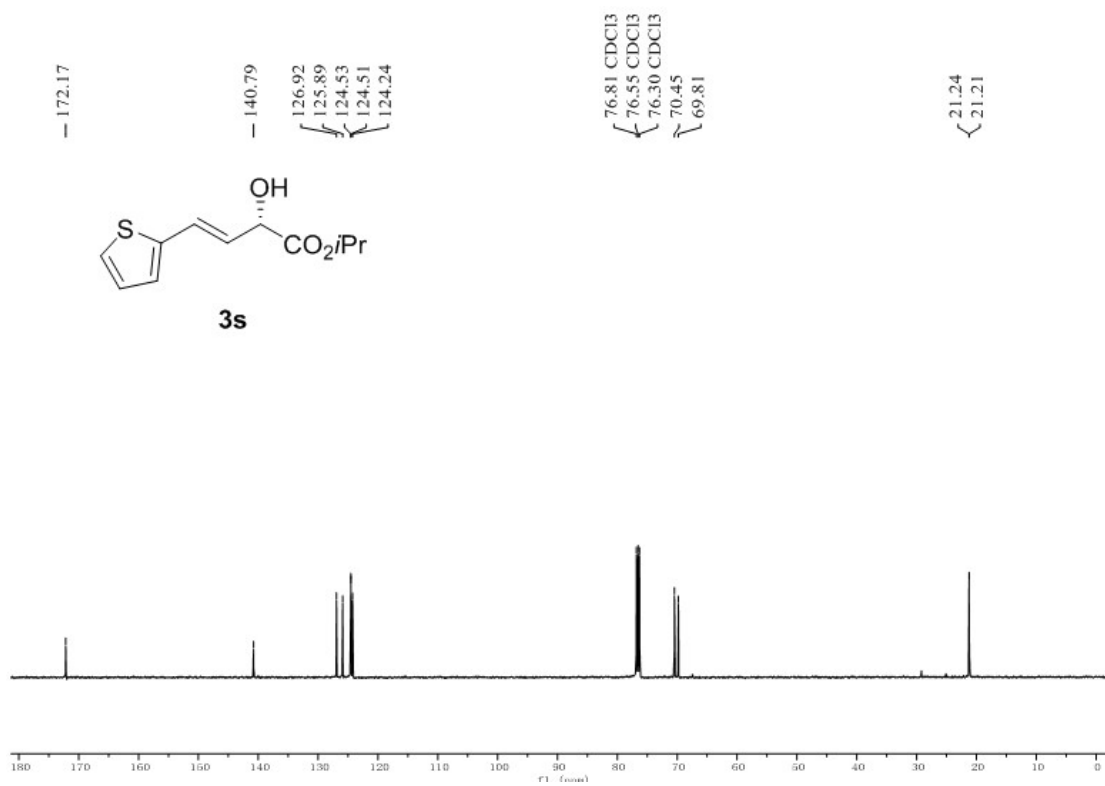

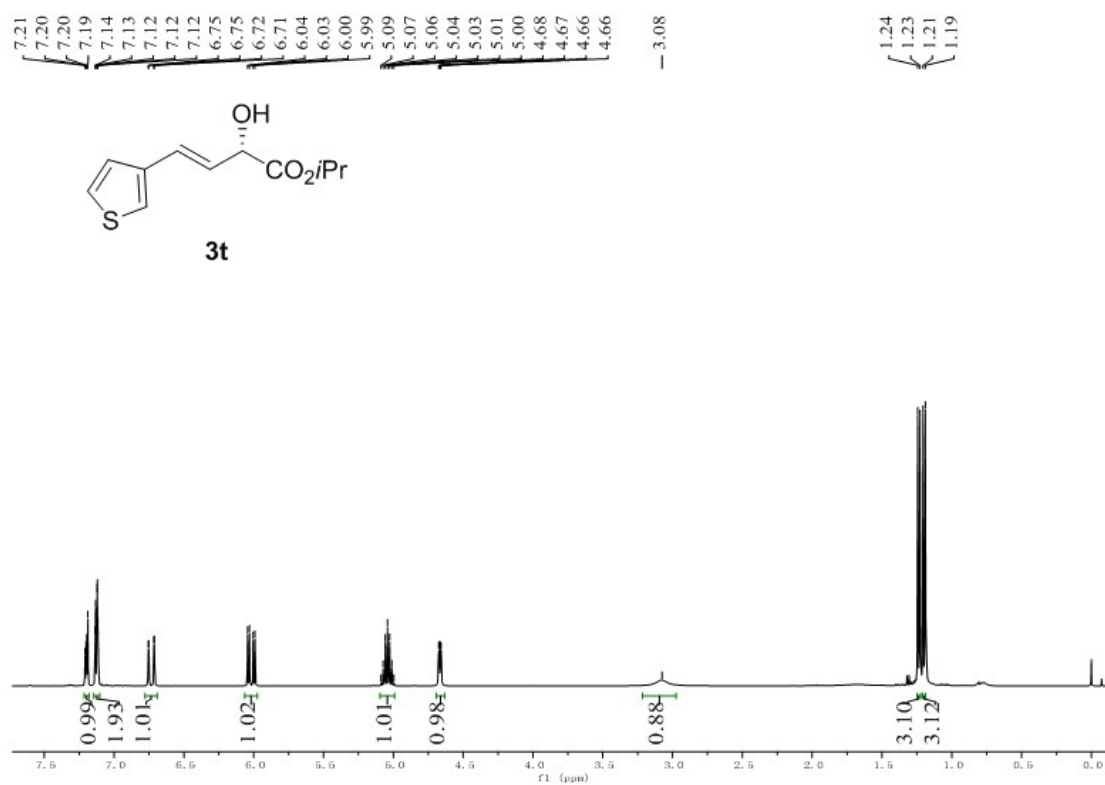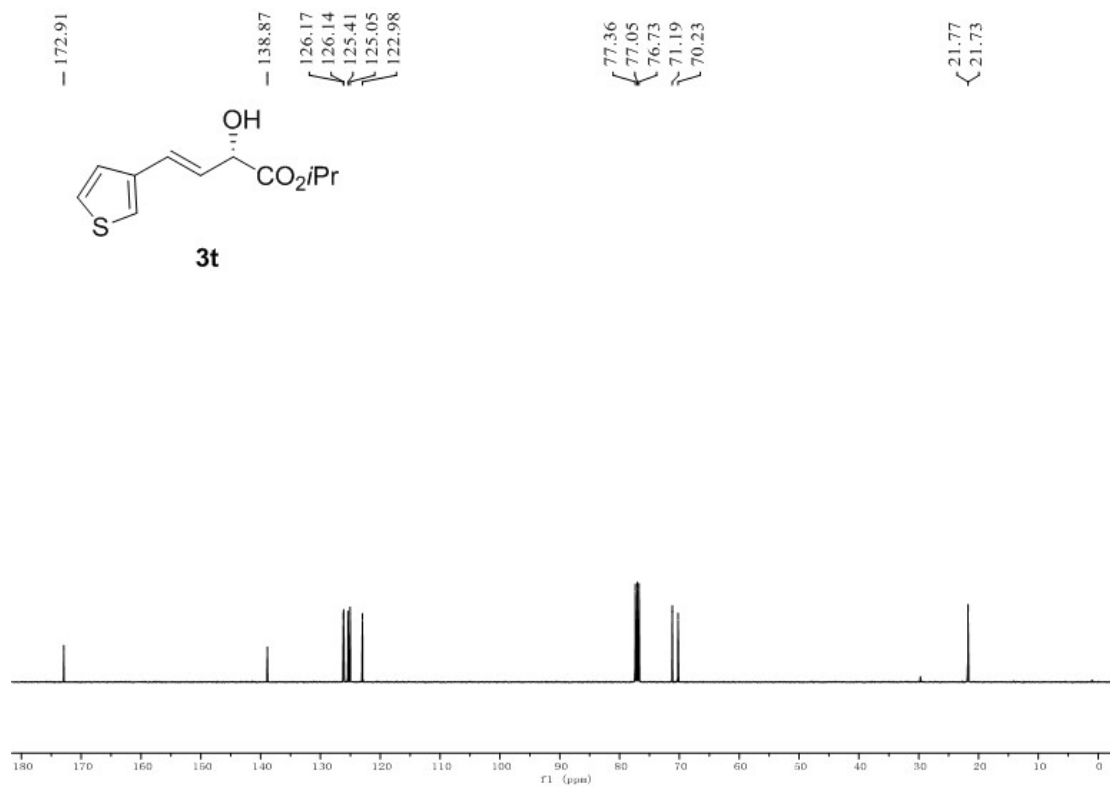



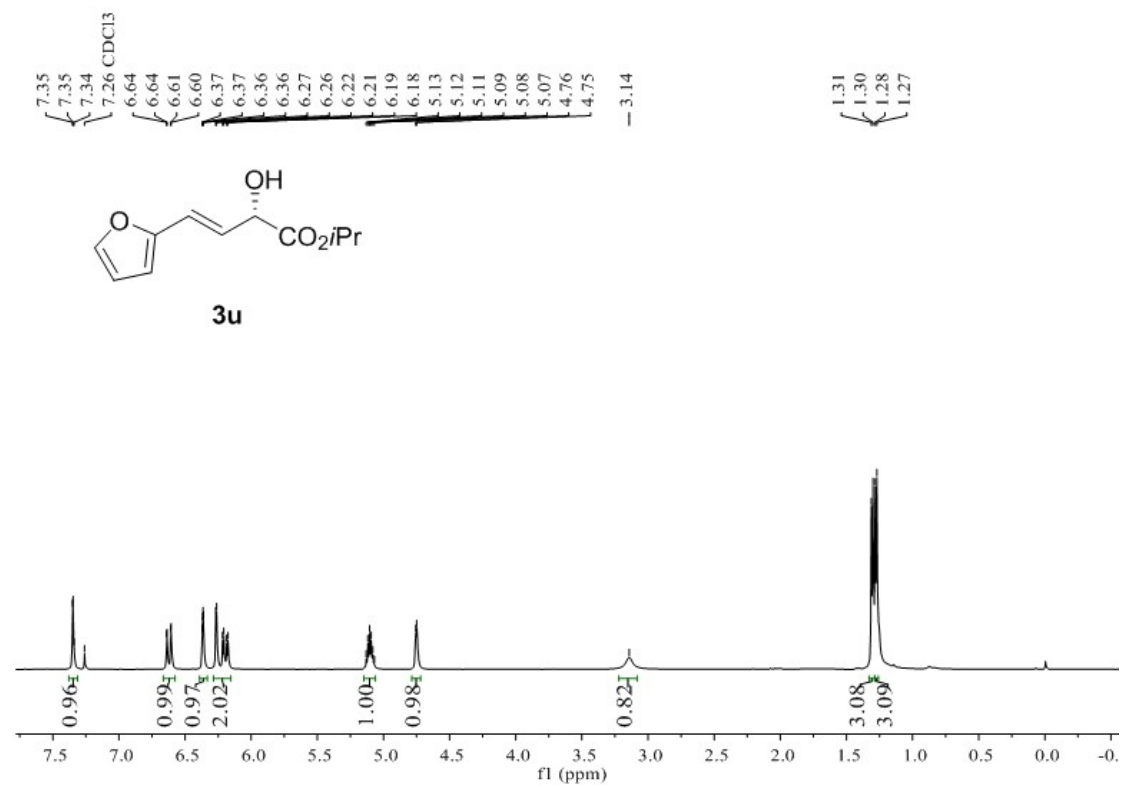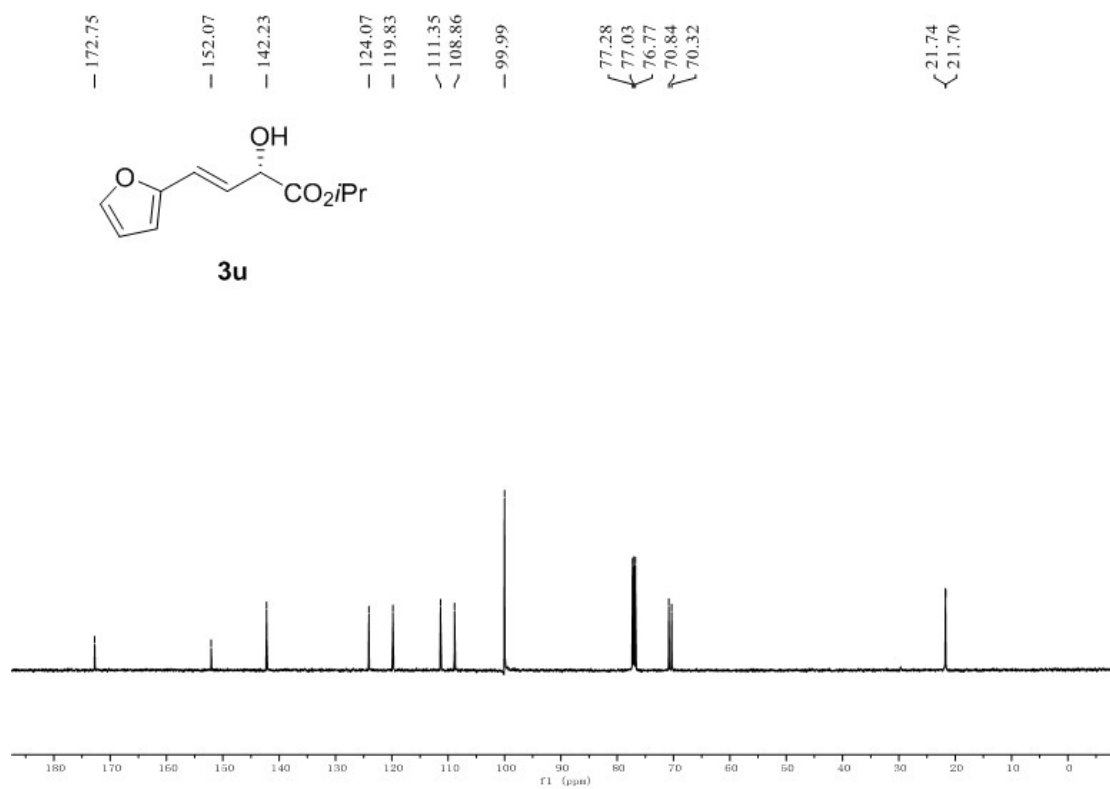

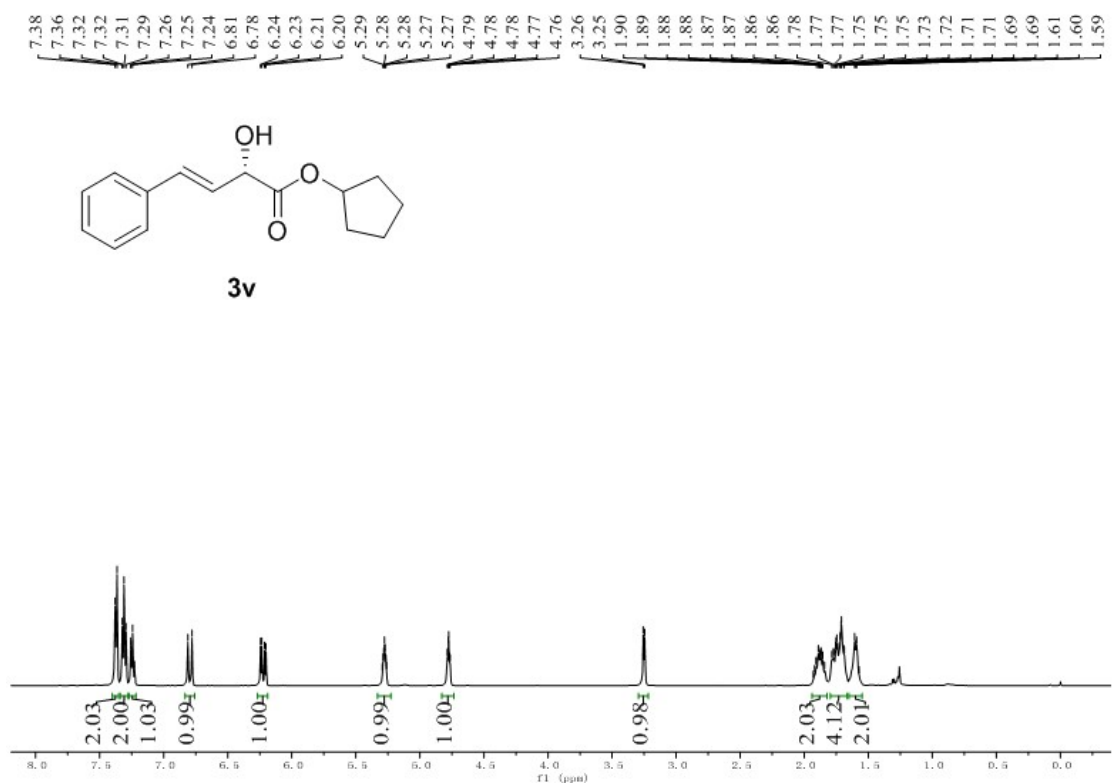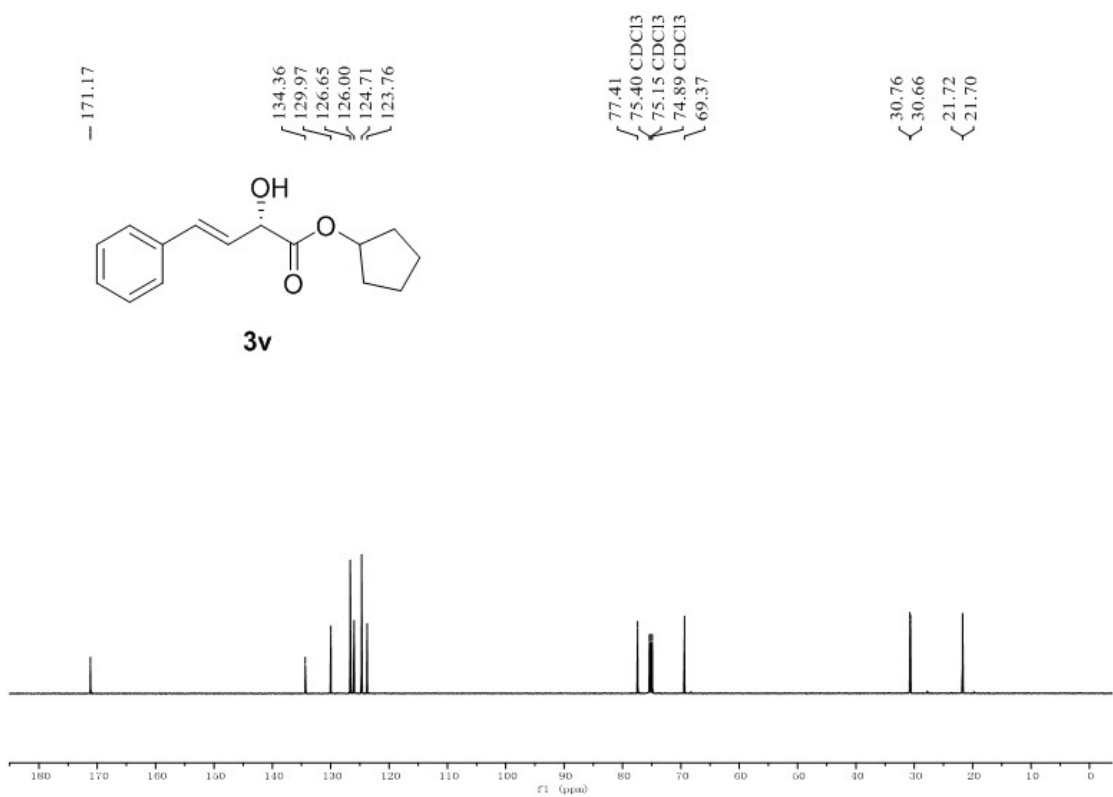

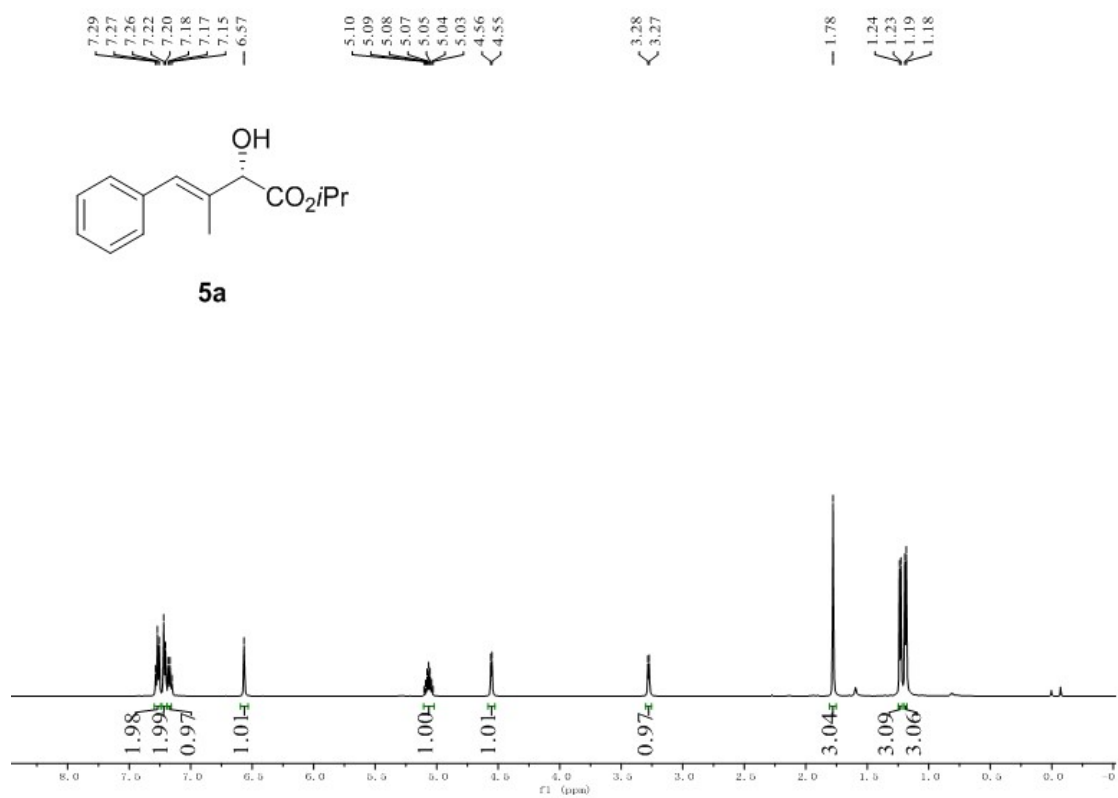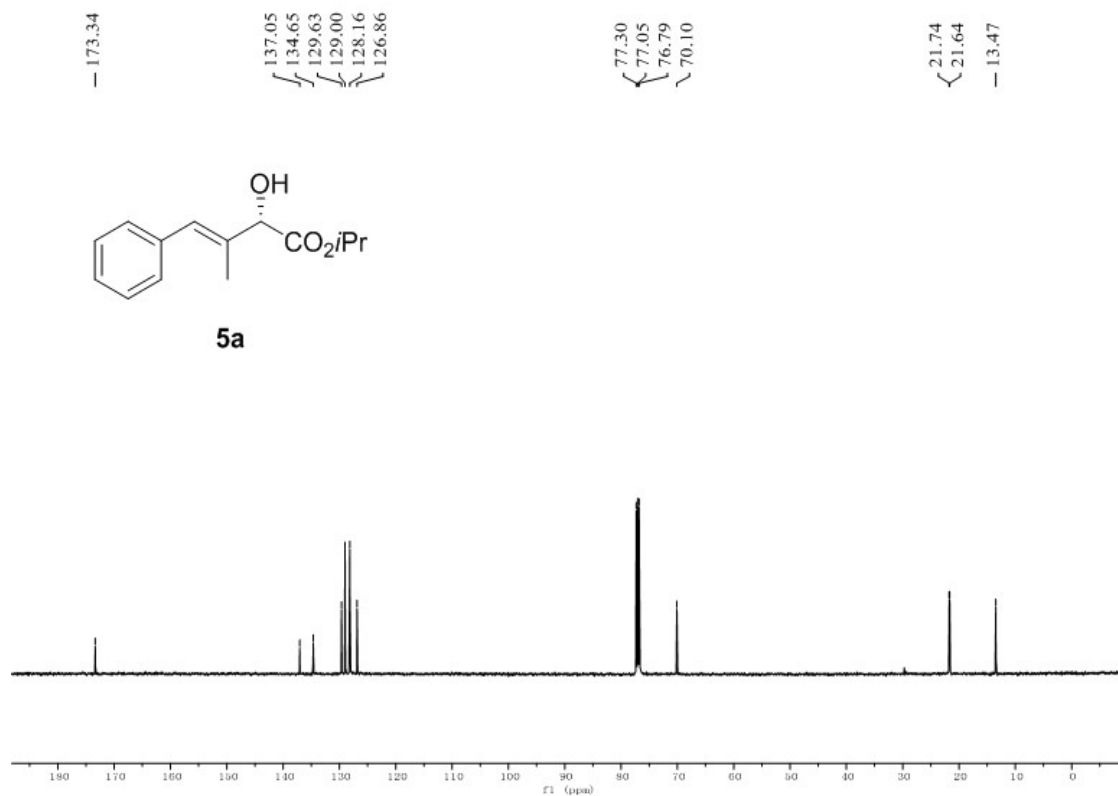

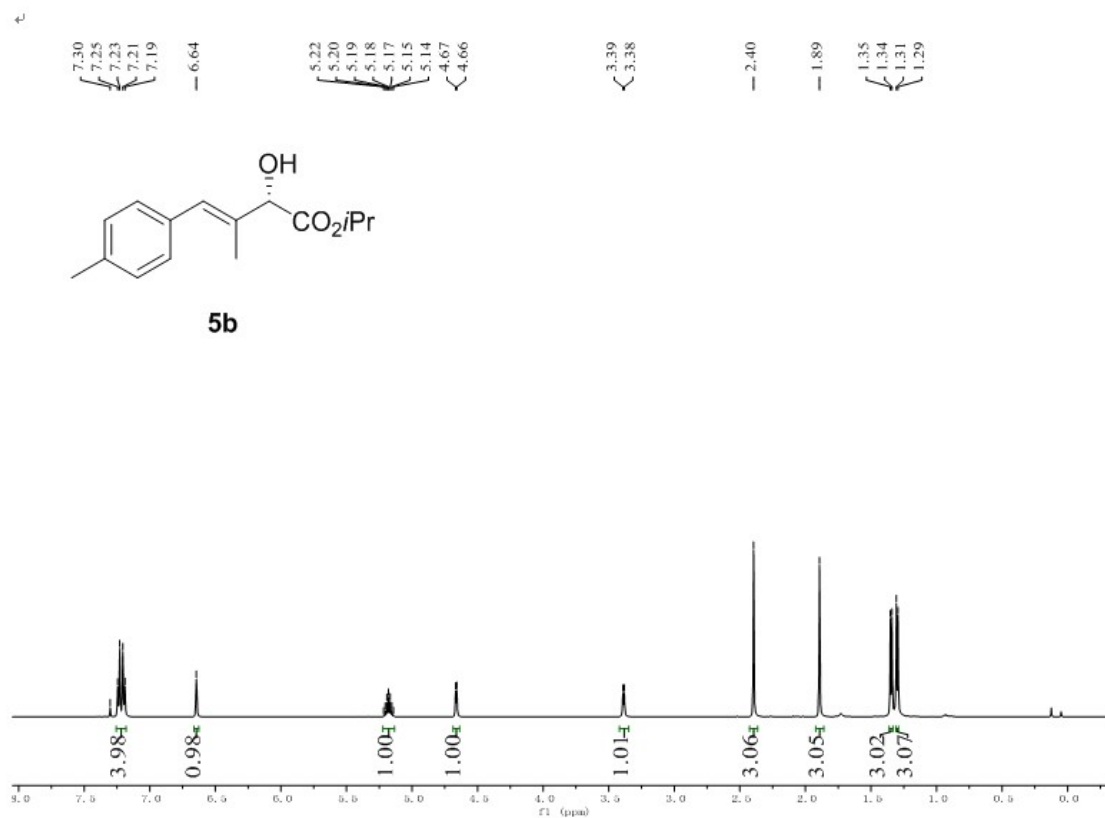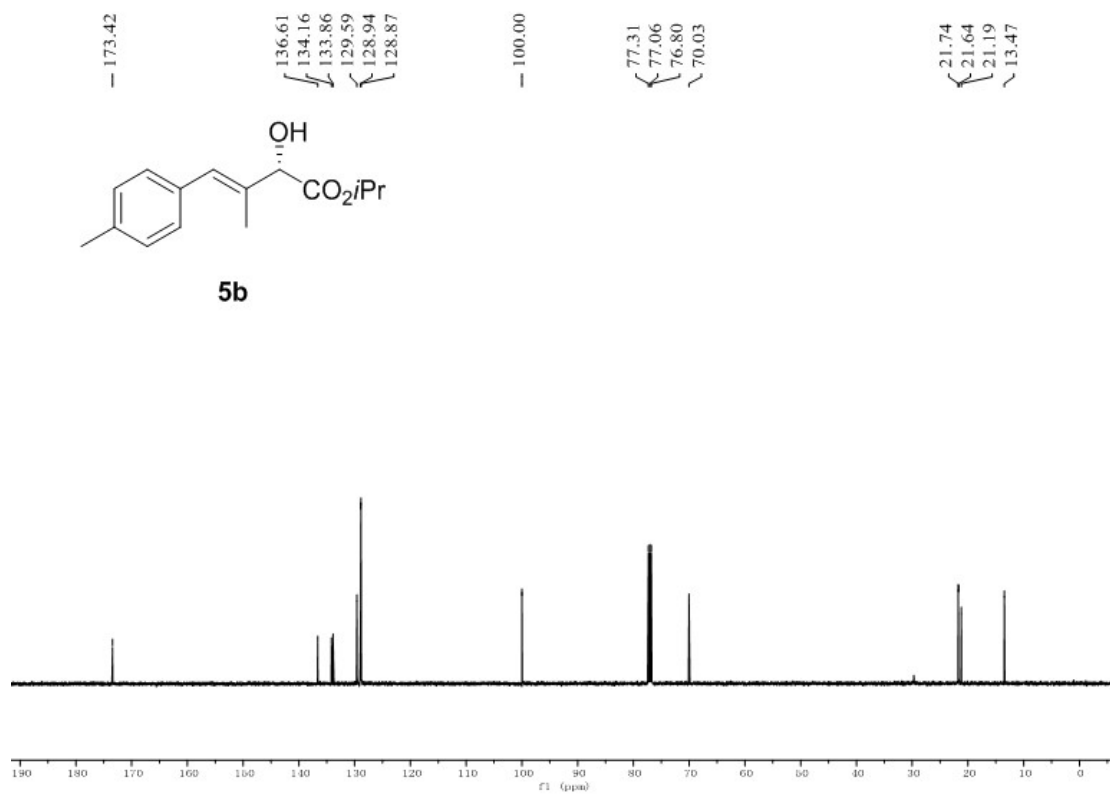

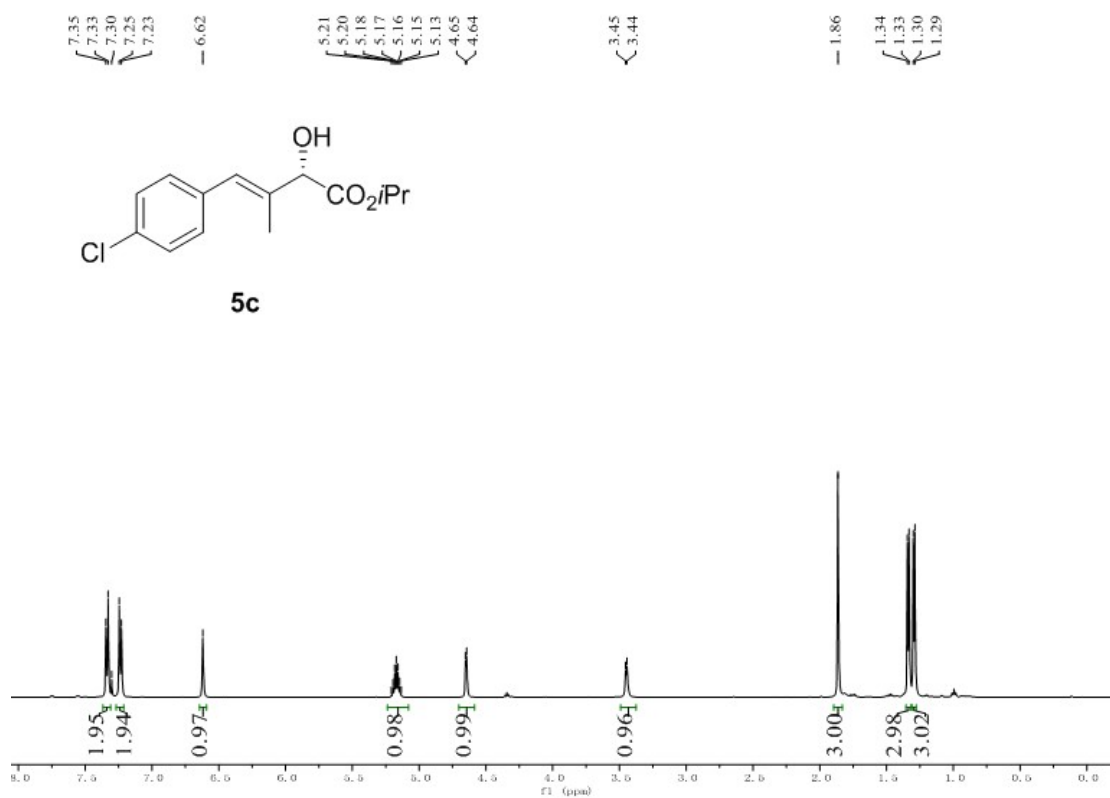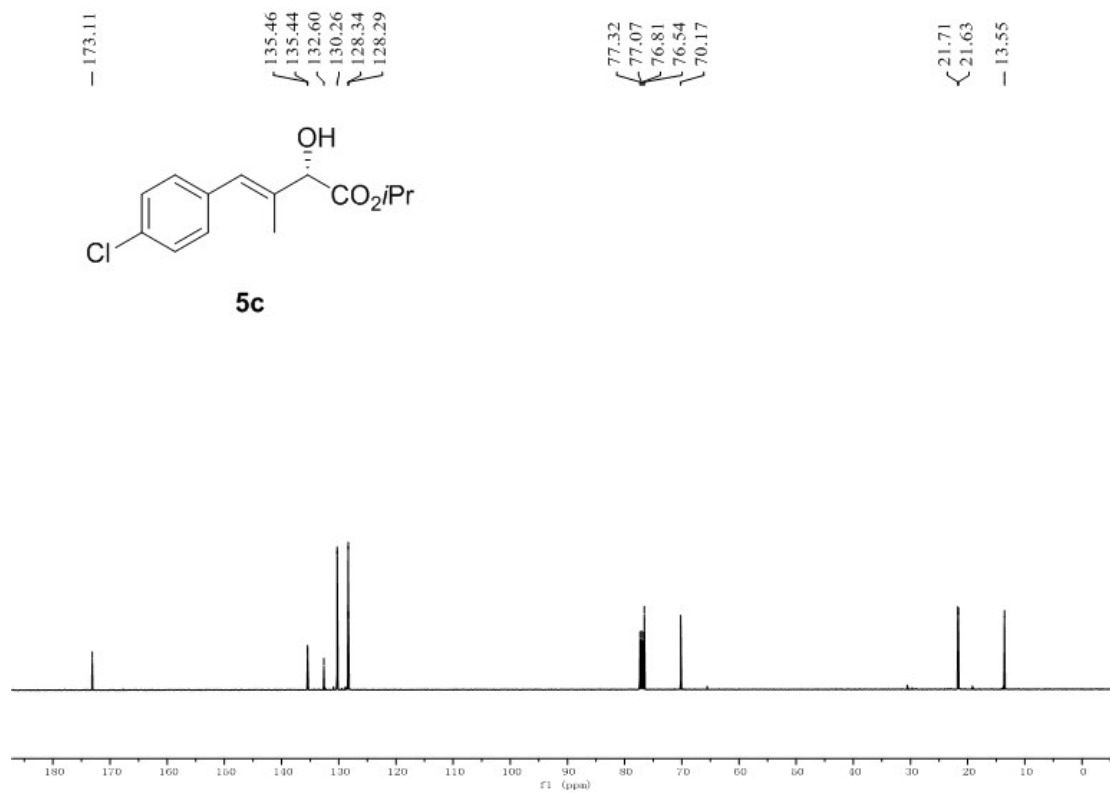

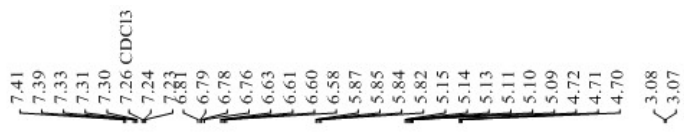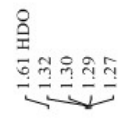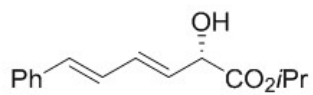

7

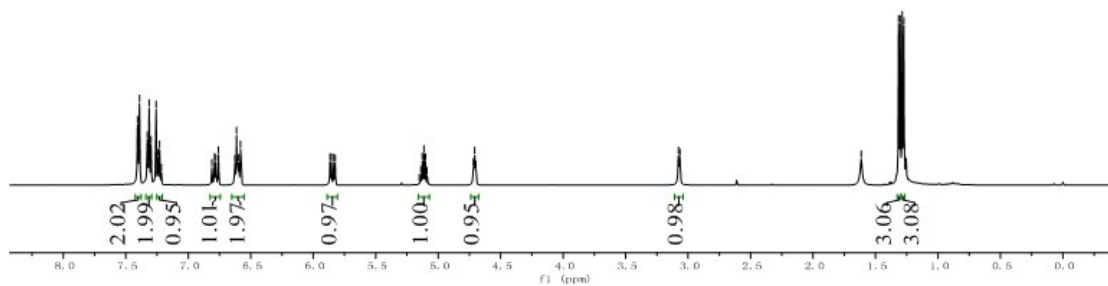

172.81

136.98  
133.68  
132.30  
129.27  
128.61  
127.76  
127.64  
126.46

77.27  
77.01  
76.76  
71.09  
70.20

21.76  
21.71

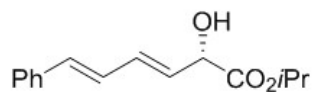

7

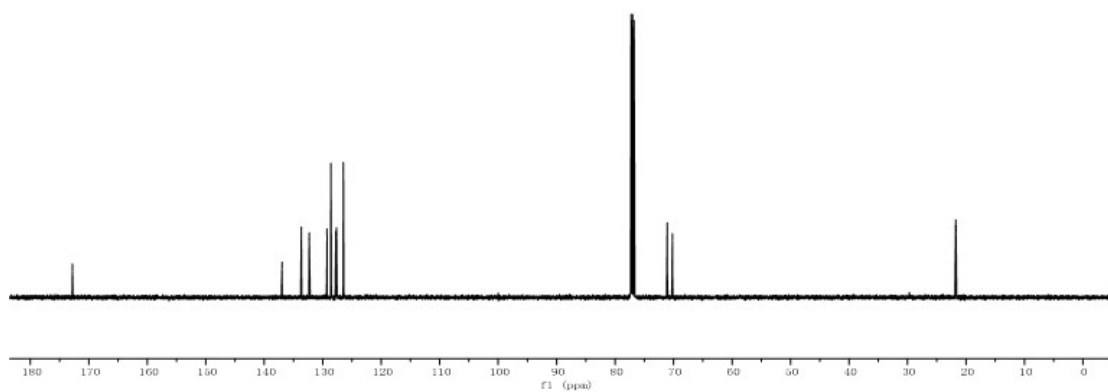

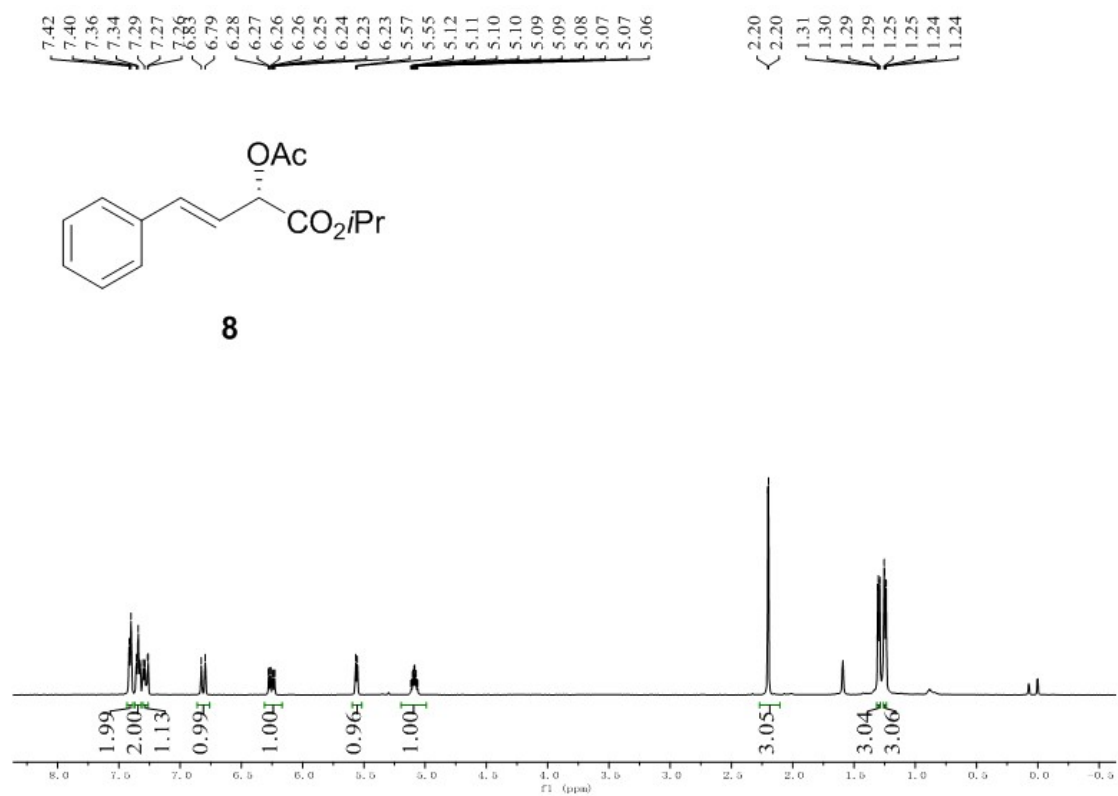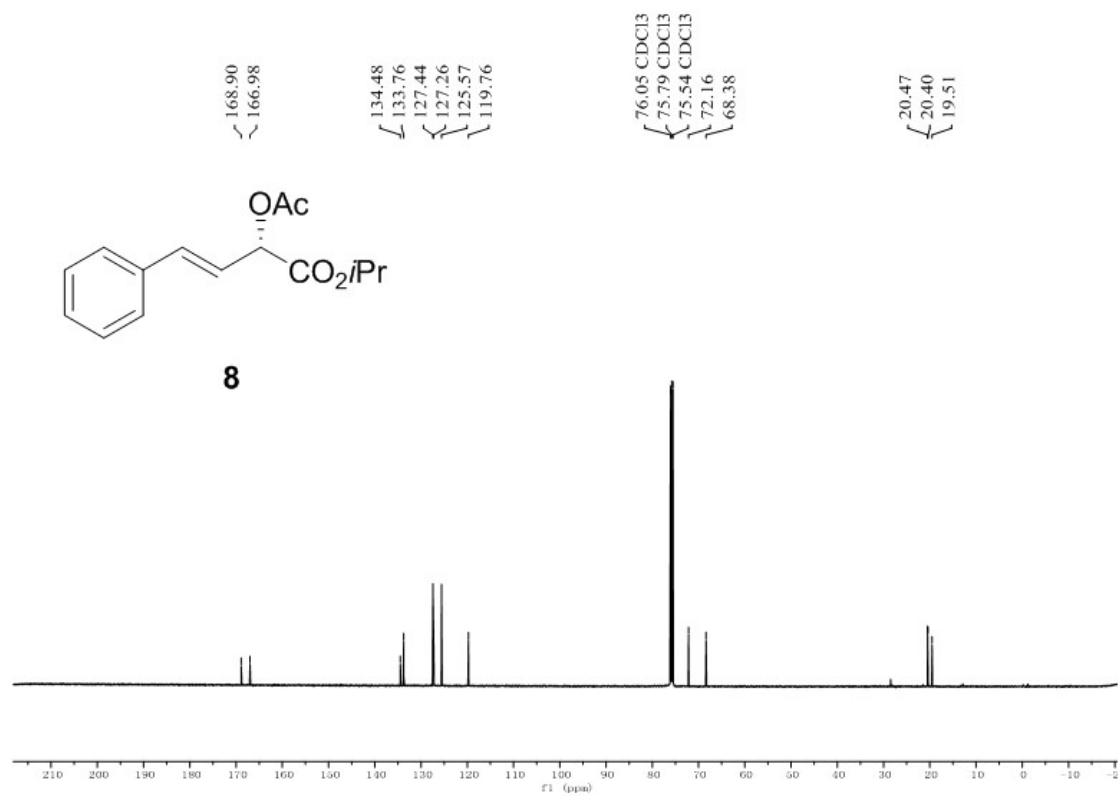

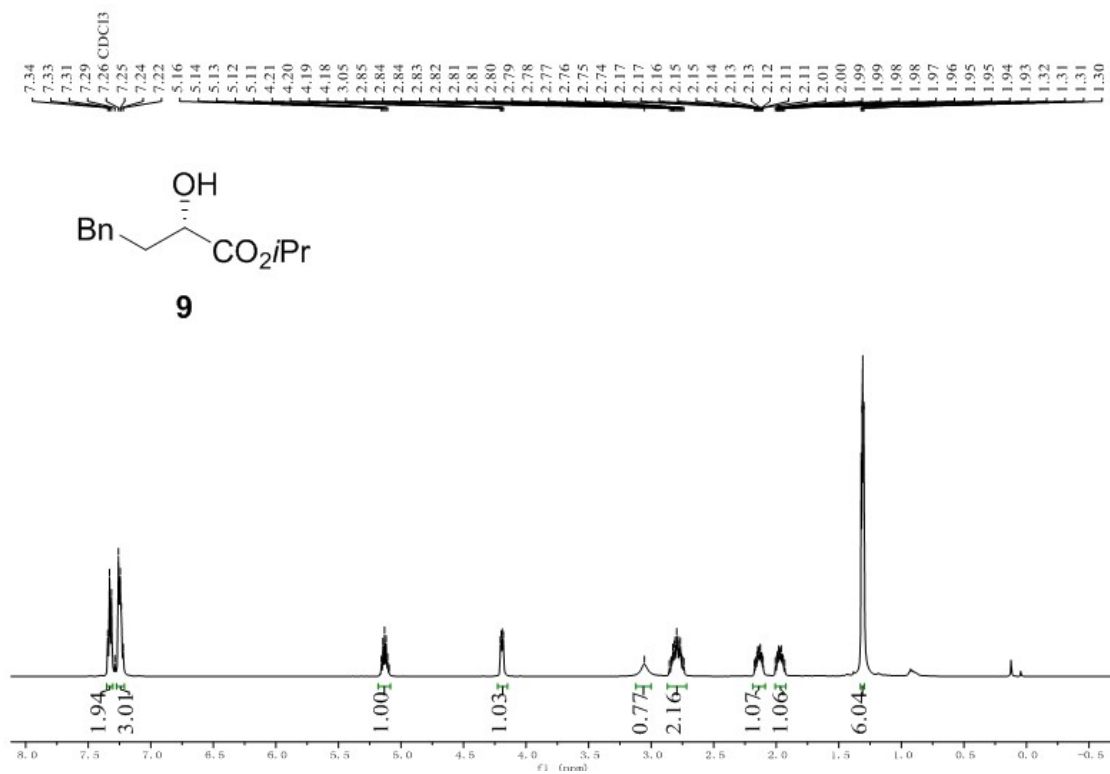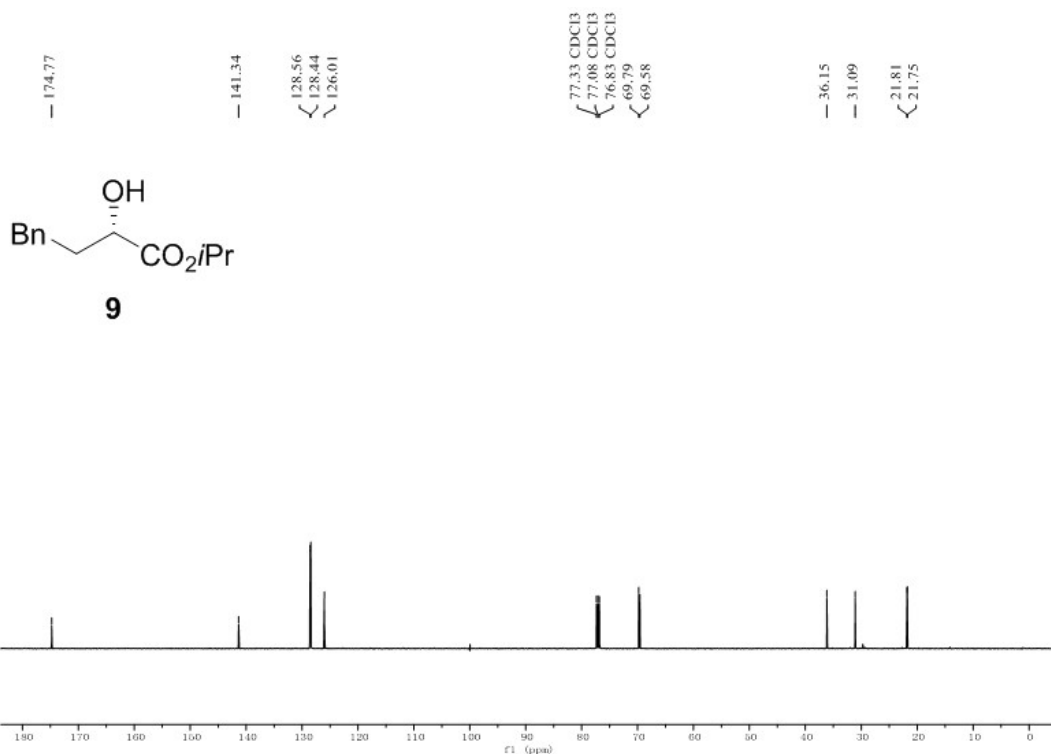



7.32 7.31 7.29 7.27 7.25 7.23 7.22 7.21 7.17 7.16 7.15 7.14 4.99 4.97 4.96 4.95 4.94 3.79 3.76 3.57 3.54 3.36 3.10 3.09 3.07 2.68 2.67 2.65 2.65 2.64 2.63 2.62 2.62 2.61 2.60 2.51 2.45 1.85 1.83 1.82 1.80 1.79 1.23 1.22 1.21 1.20 1.19

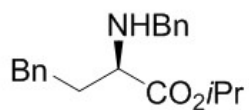

10

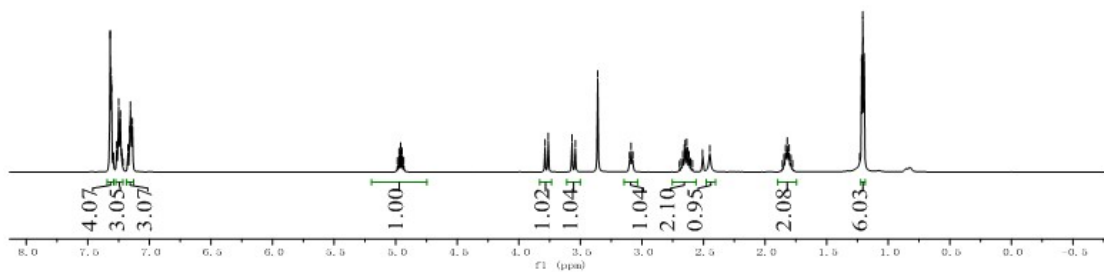

174.02 141.48 140.26 128.27 128.24 128.08 127.99 126.64 125.73 67.37 59.38 50.87 39.99 DMSO 39.82 DMSO 39.65 DMSO 39.49 DMSO 39.32 DMSO 39.15 DMSO 38.99 DMSO 34.56 31.37 21.65 21.53

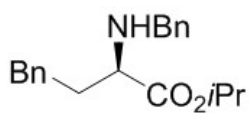

10

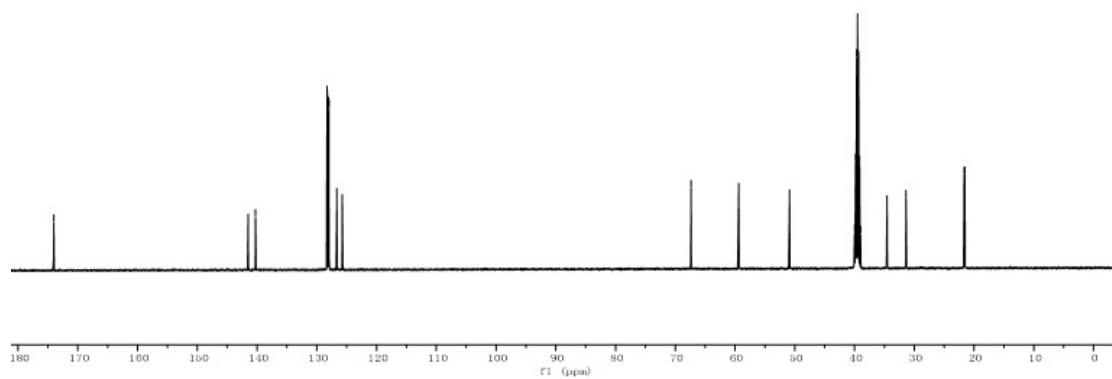

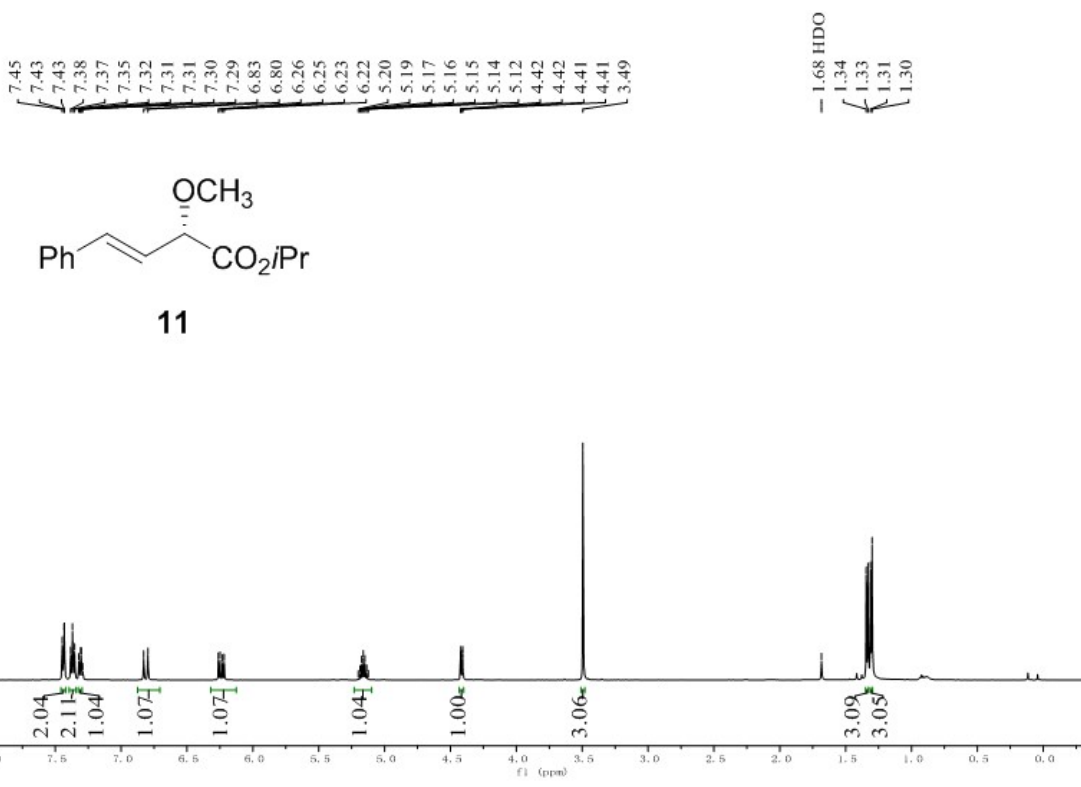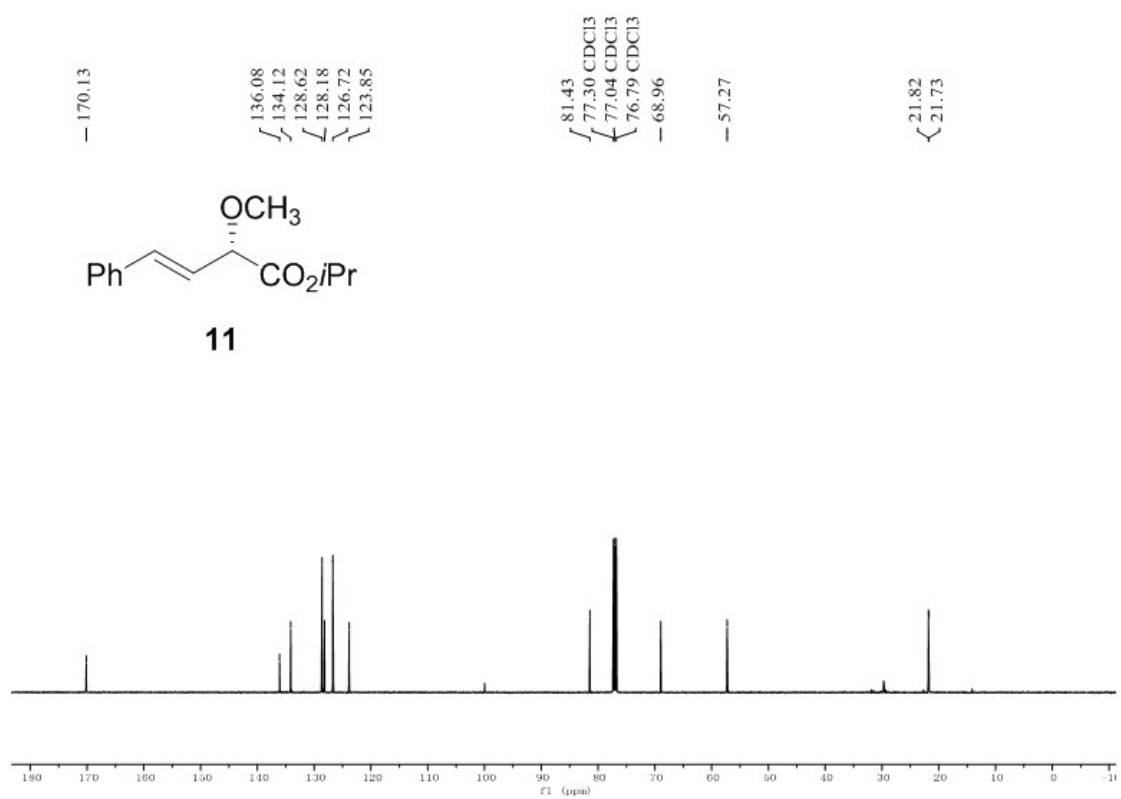

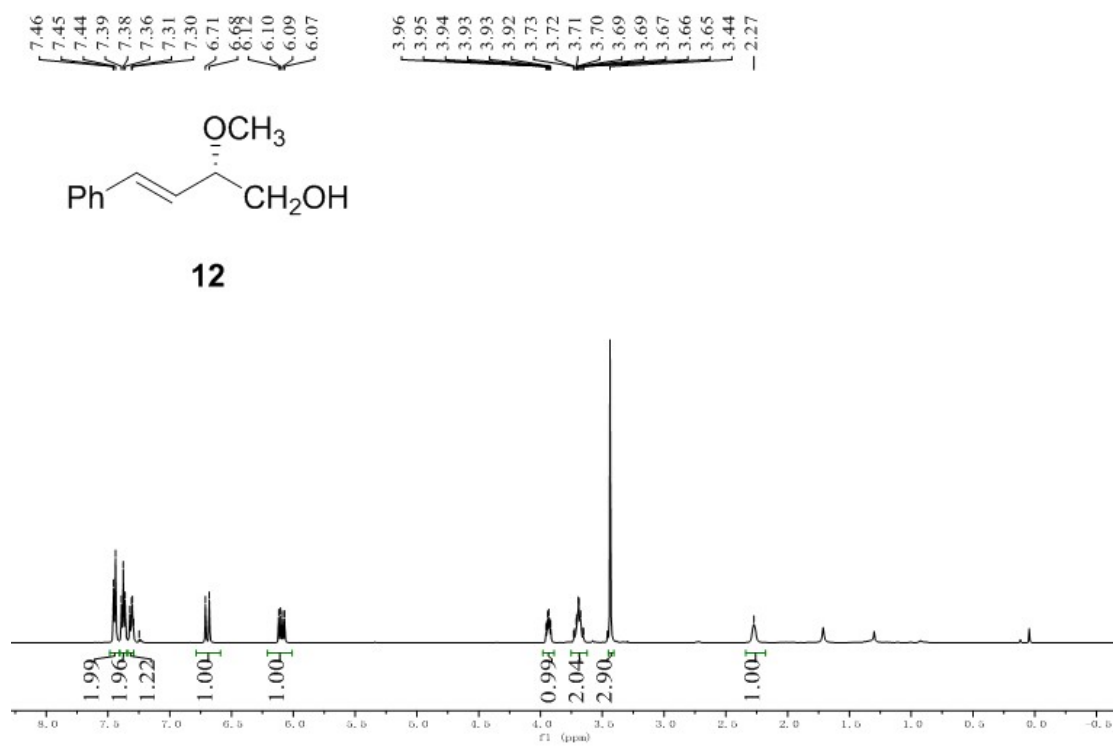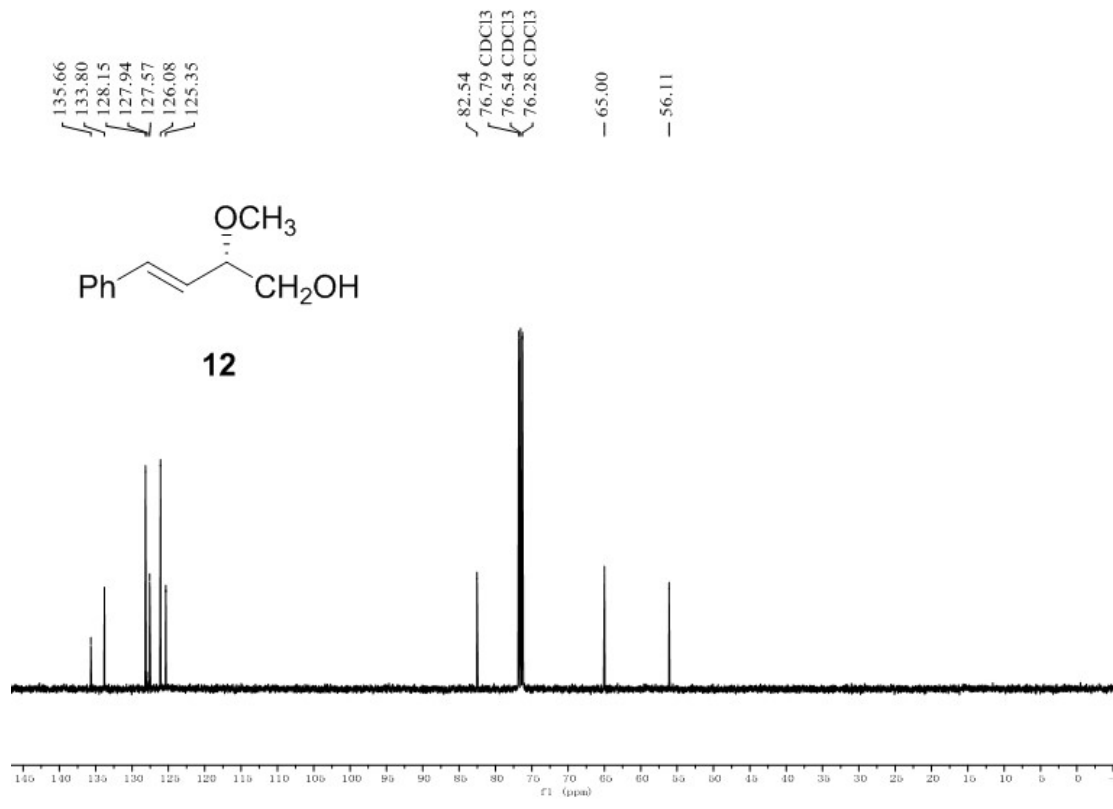

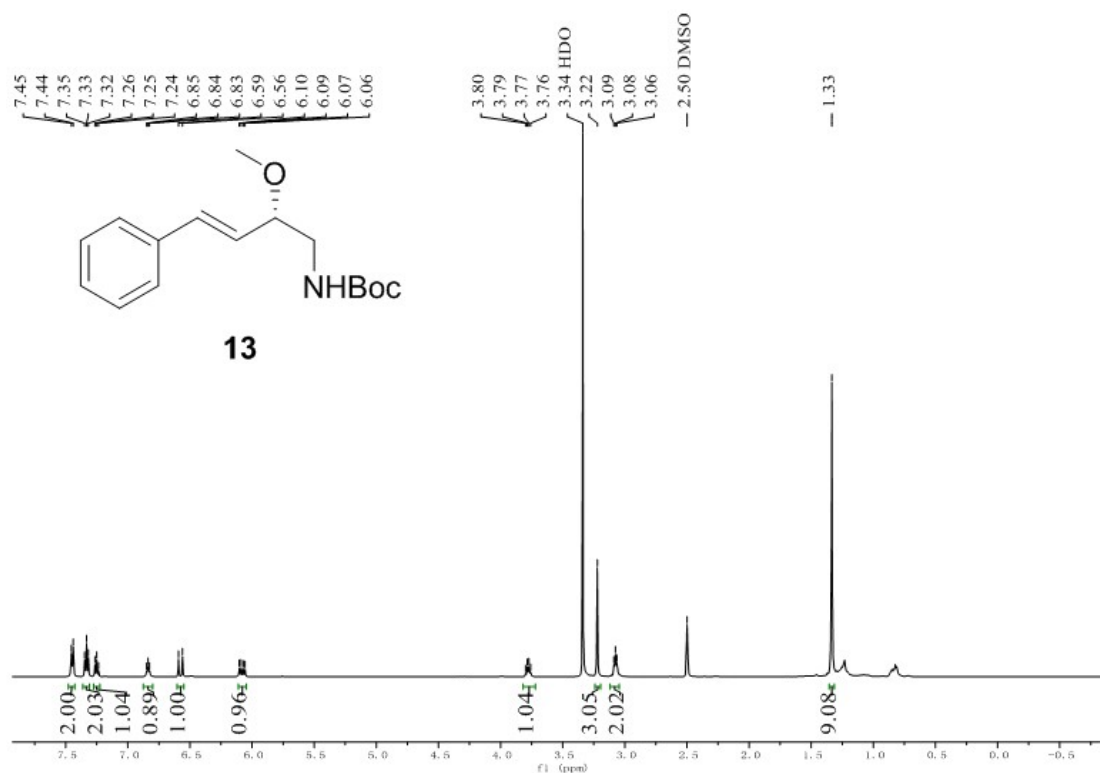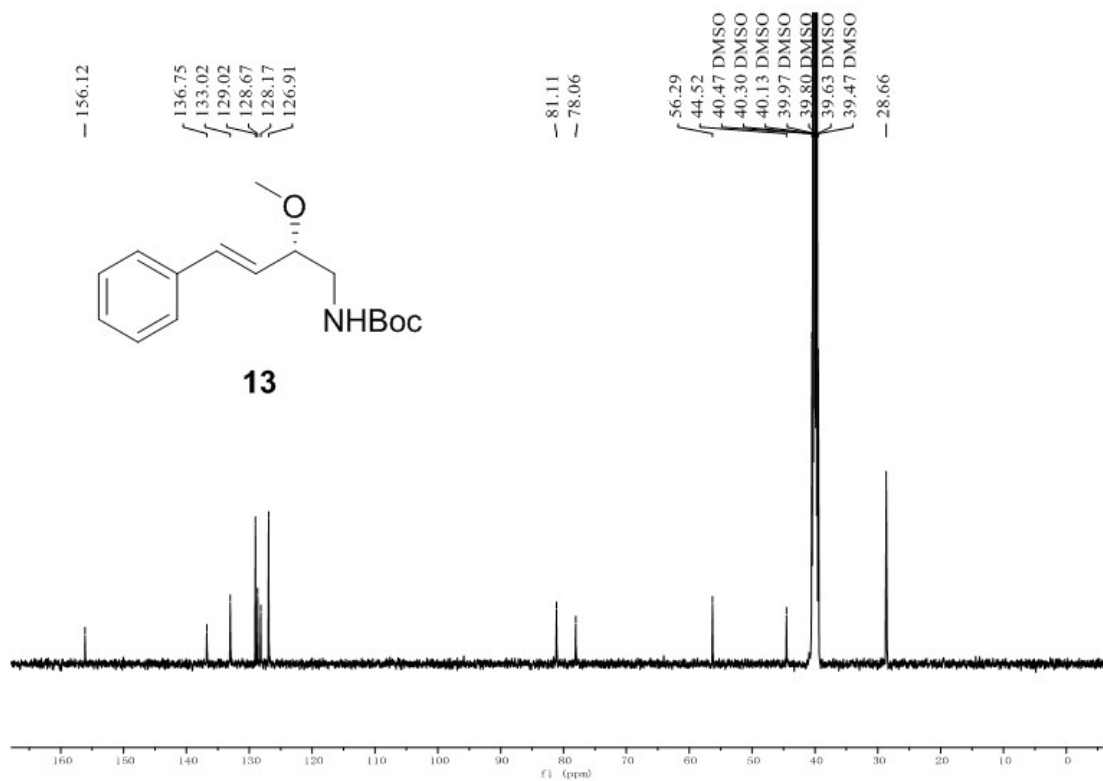

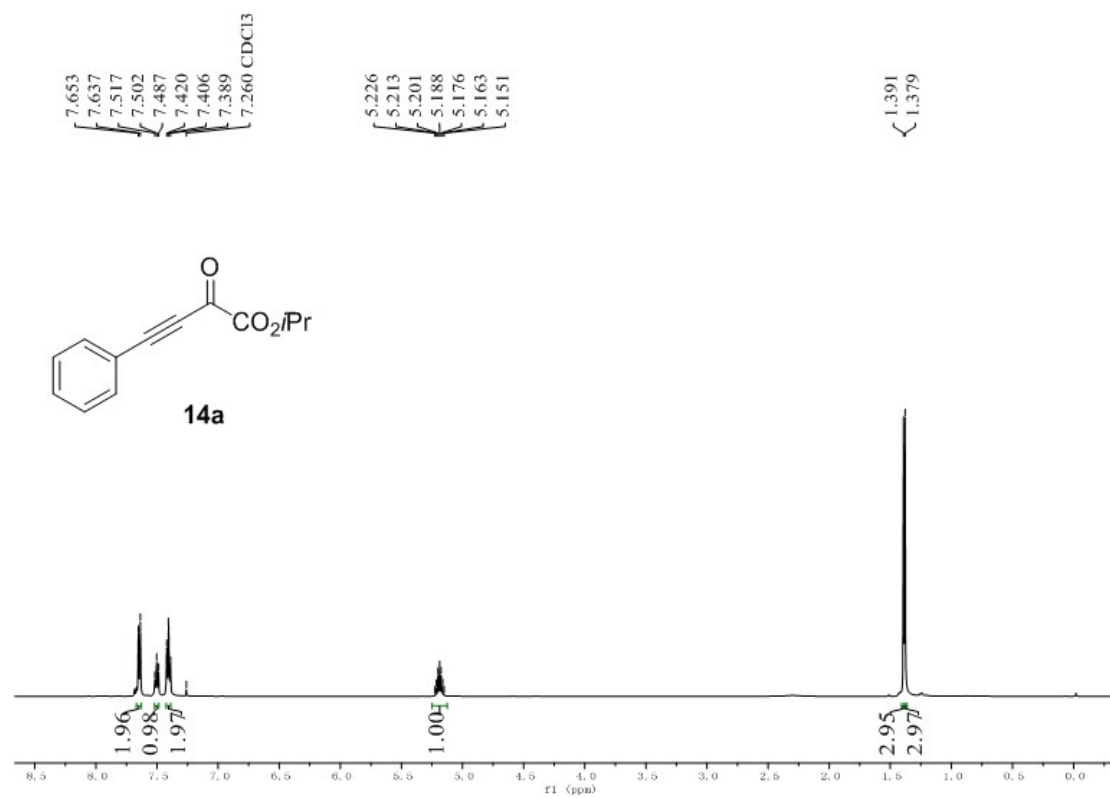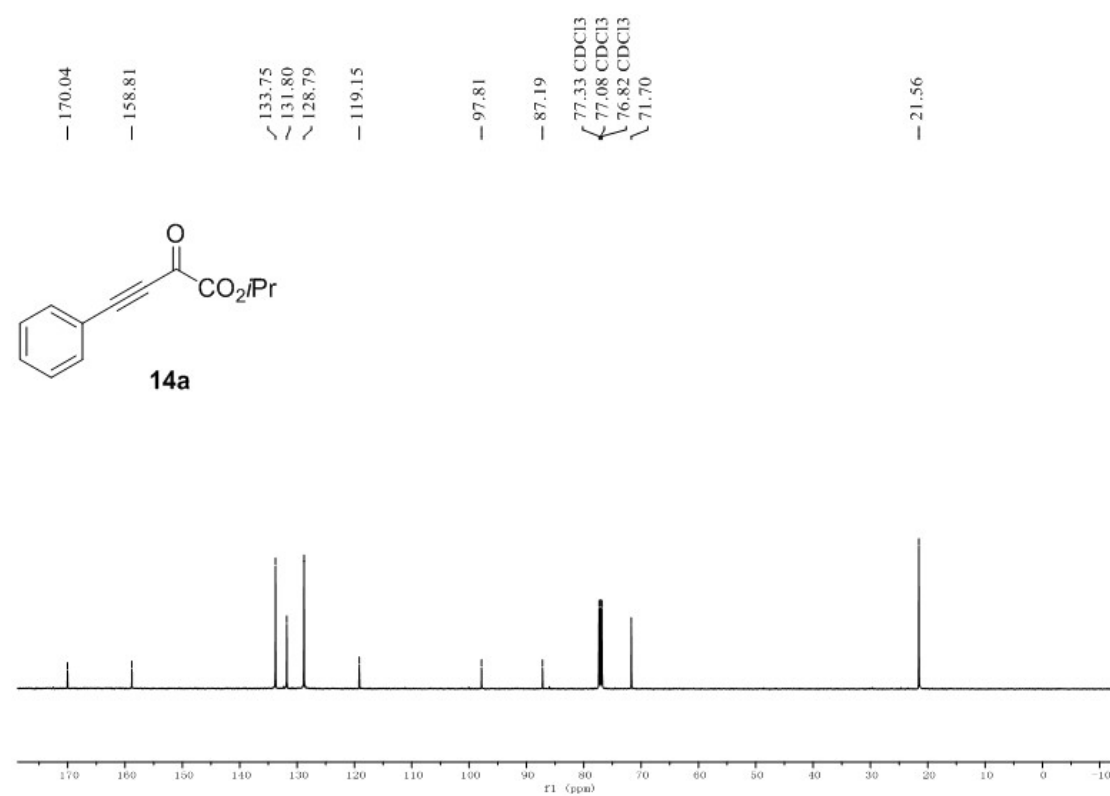

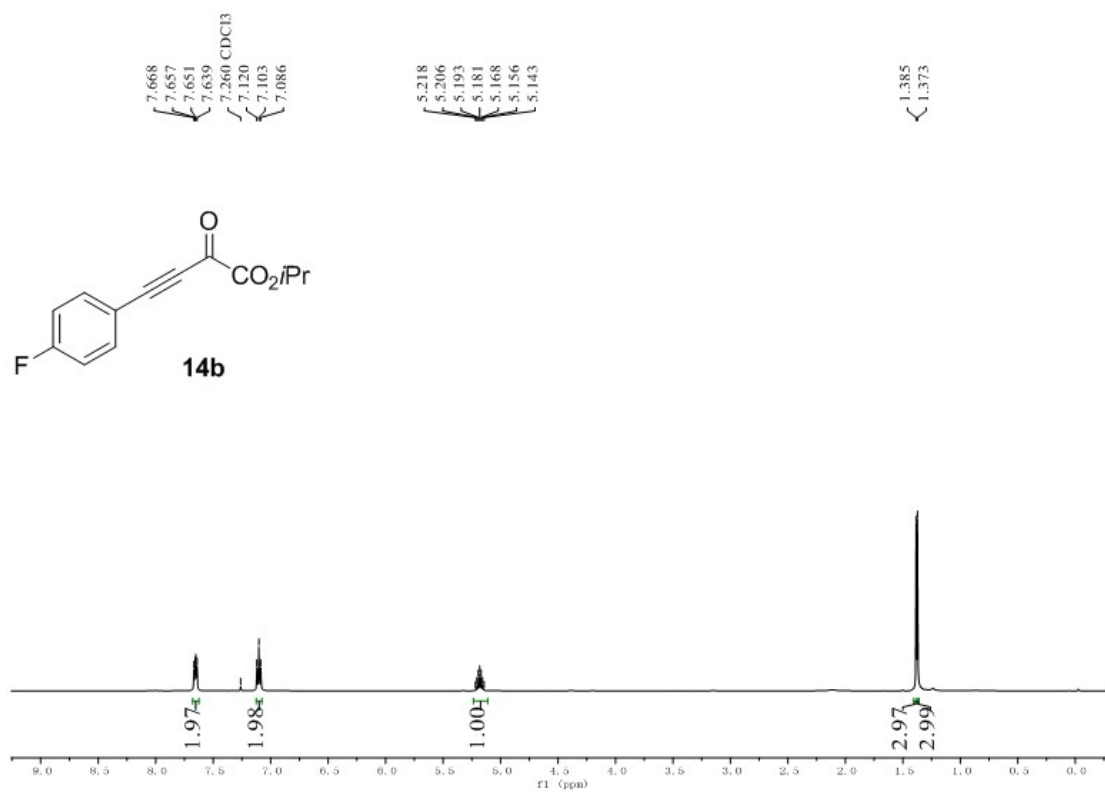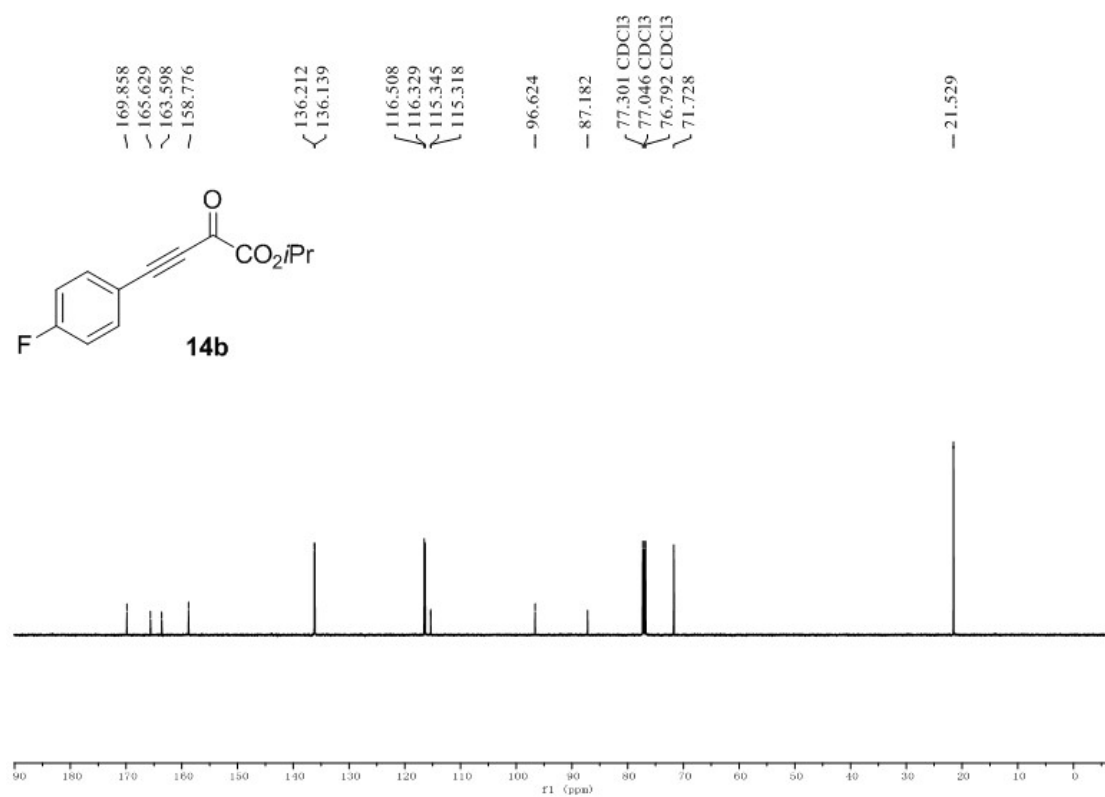

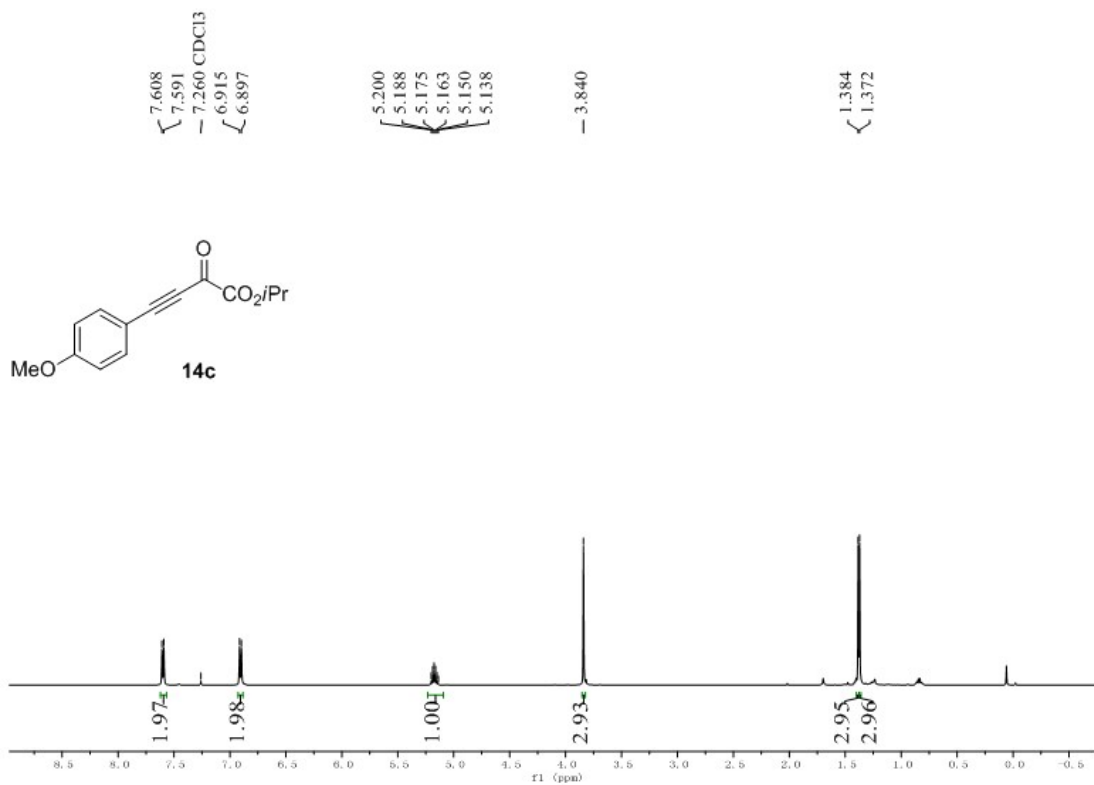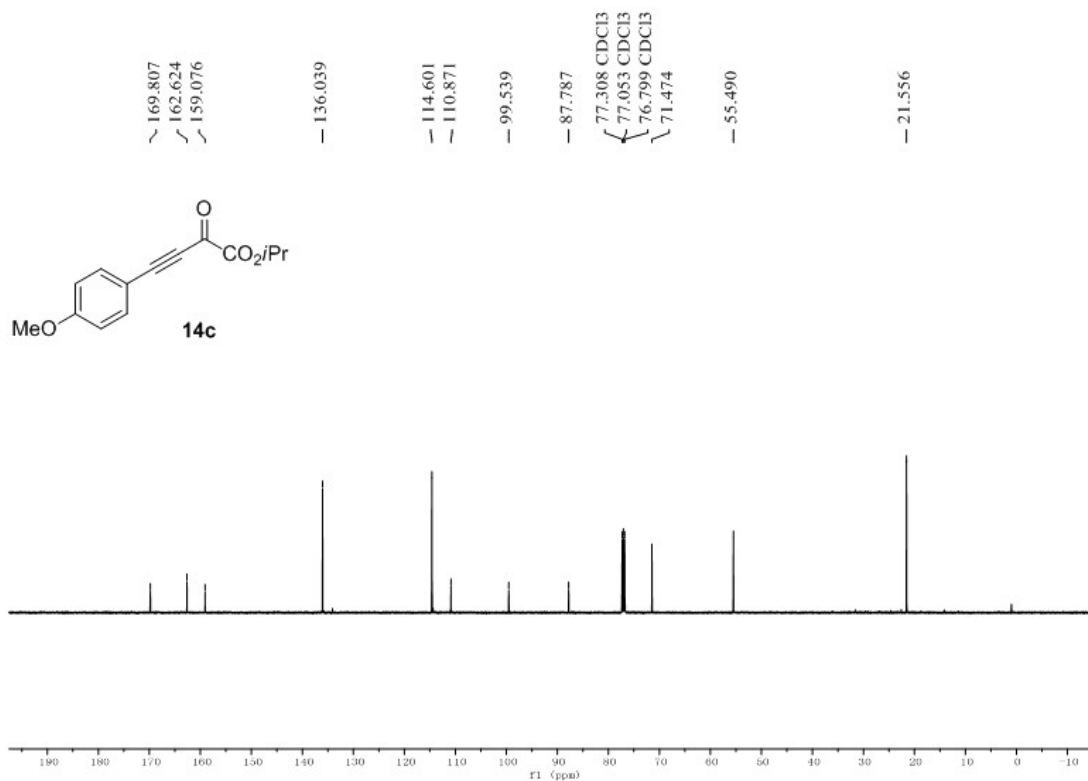

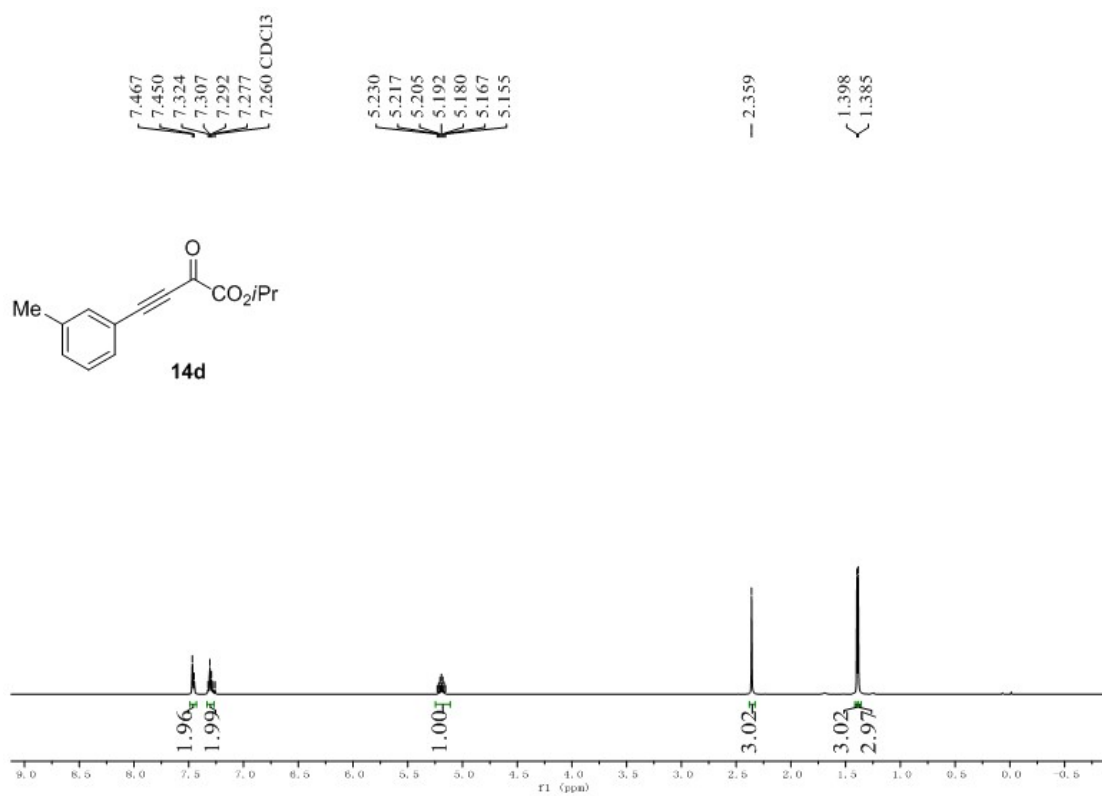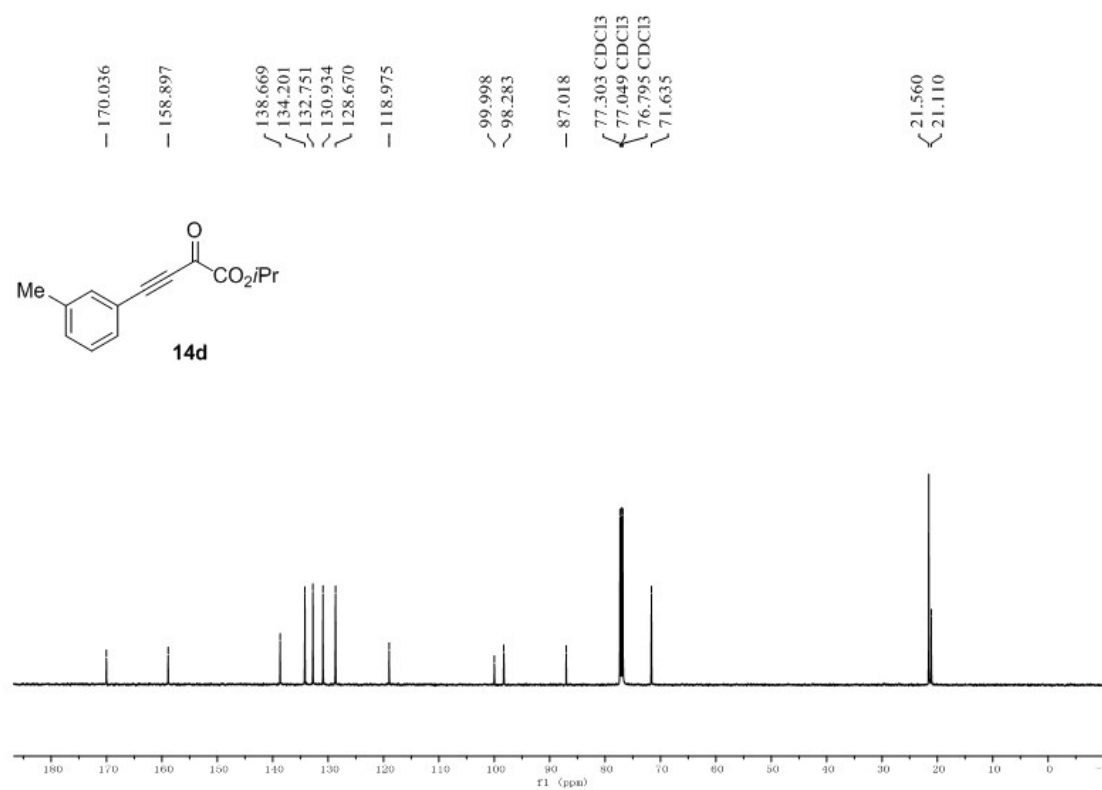



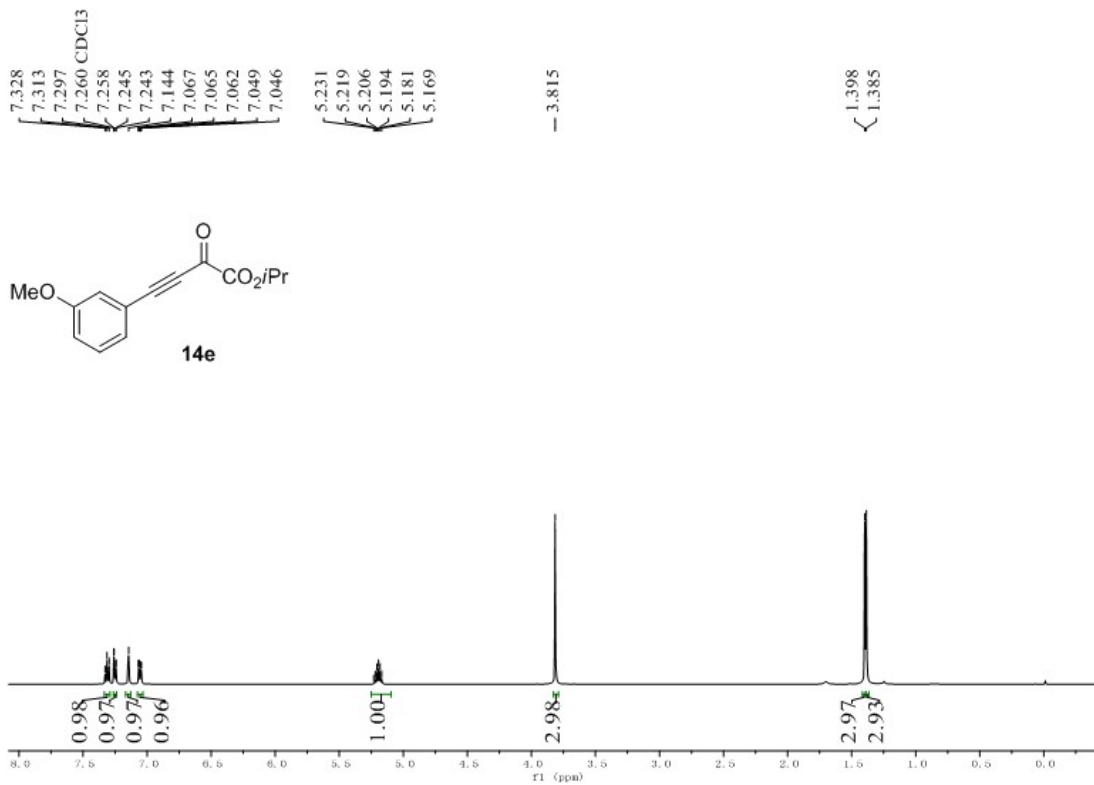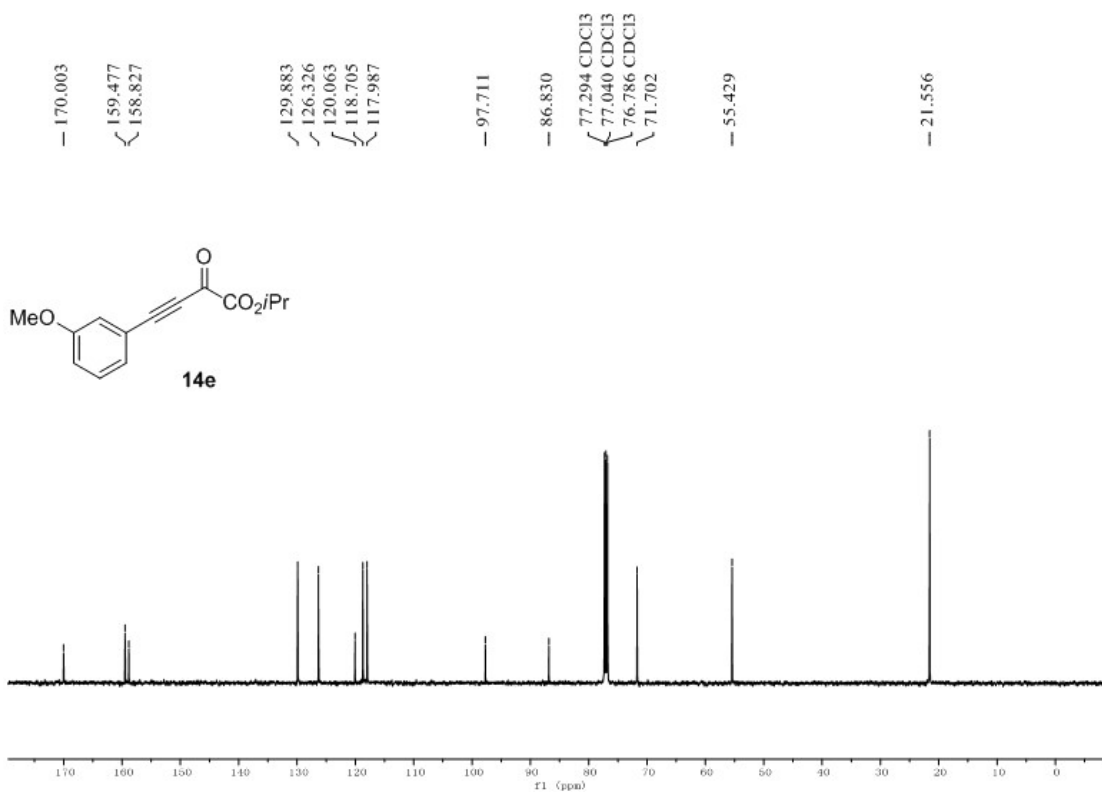

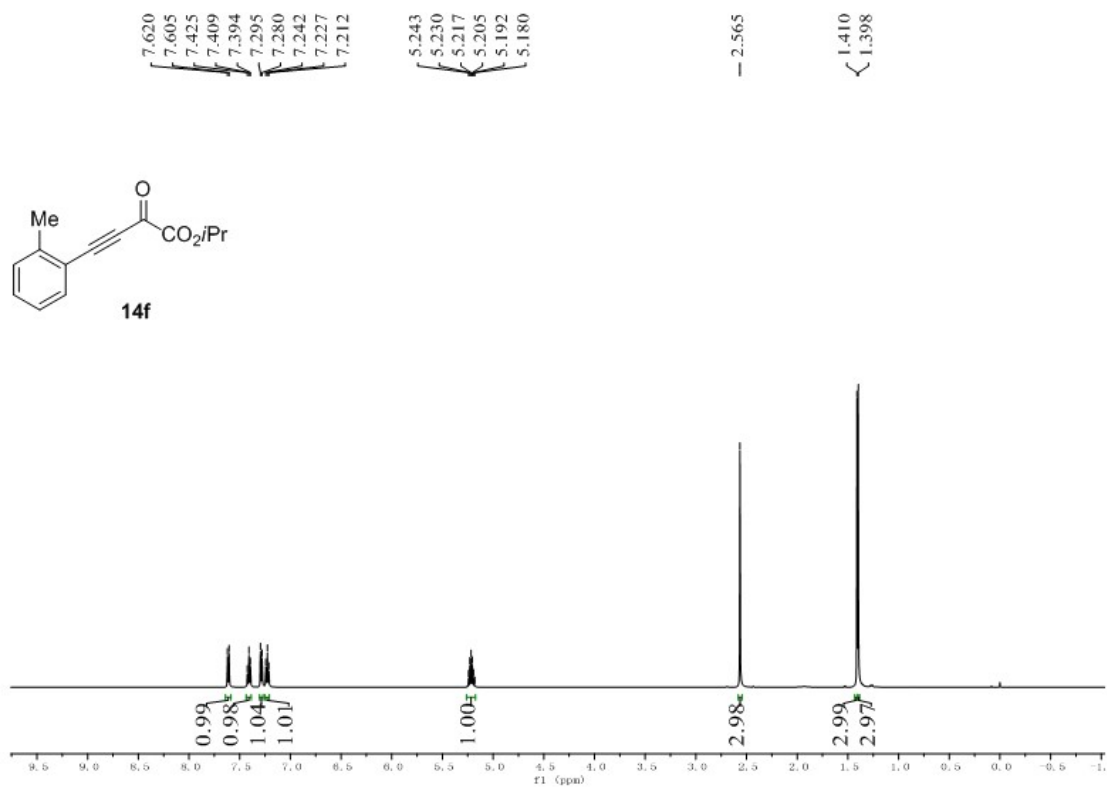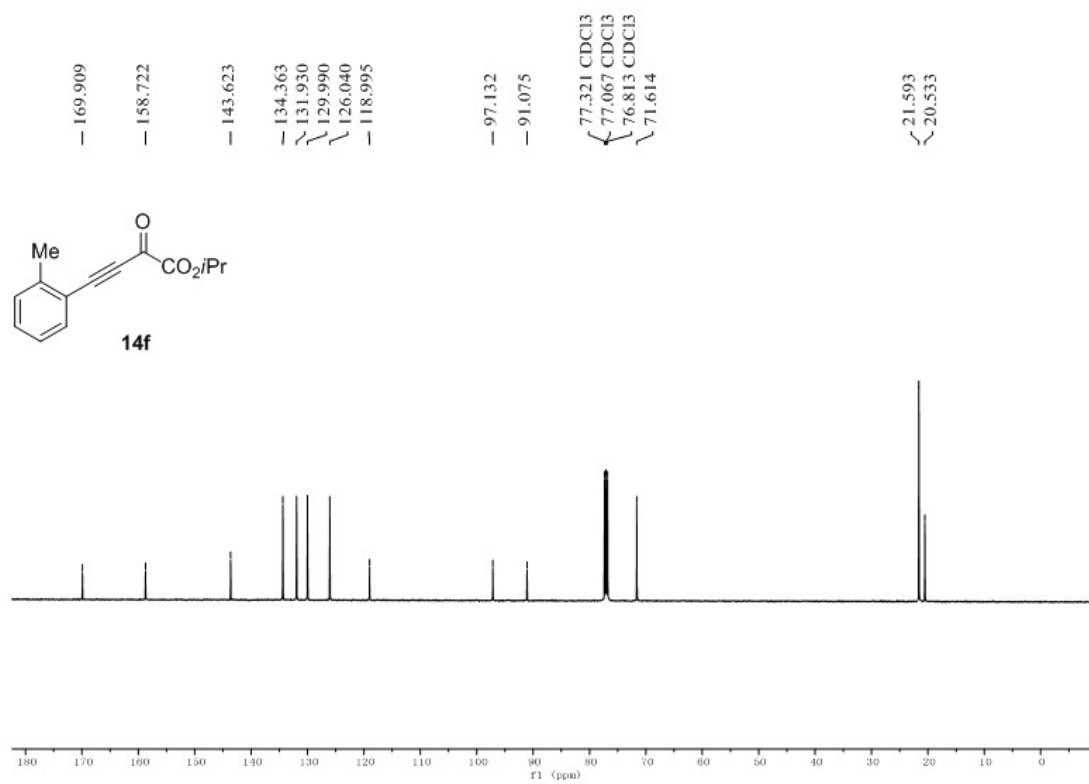

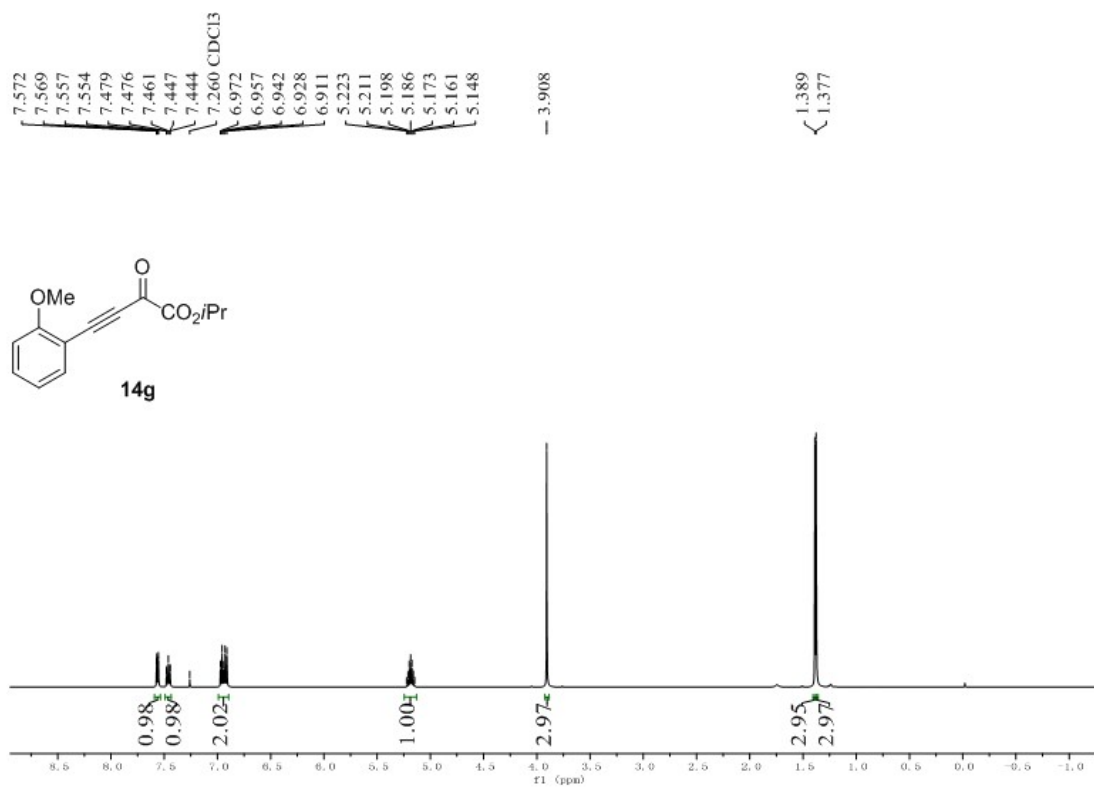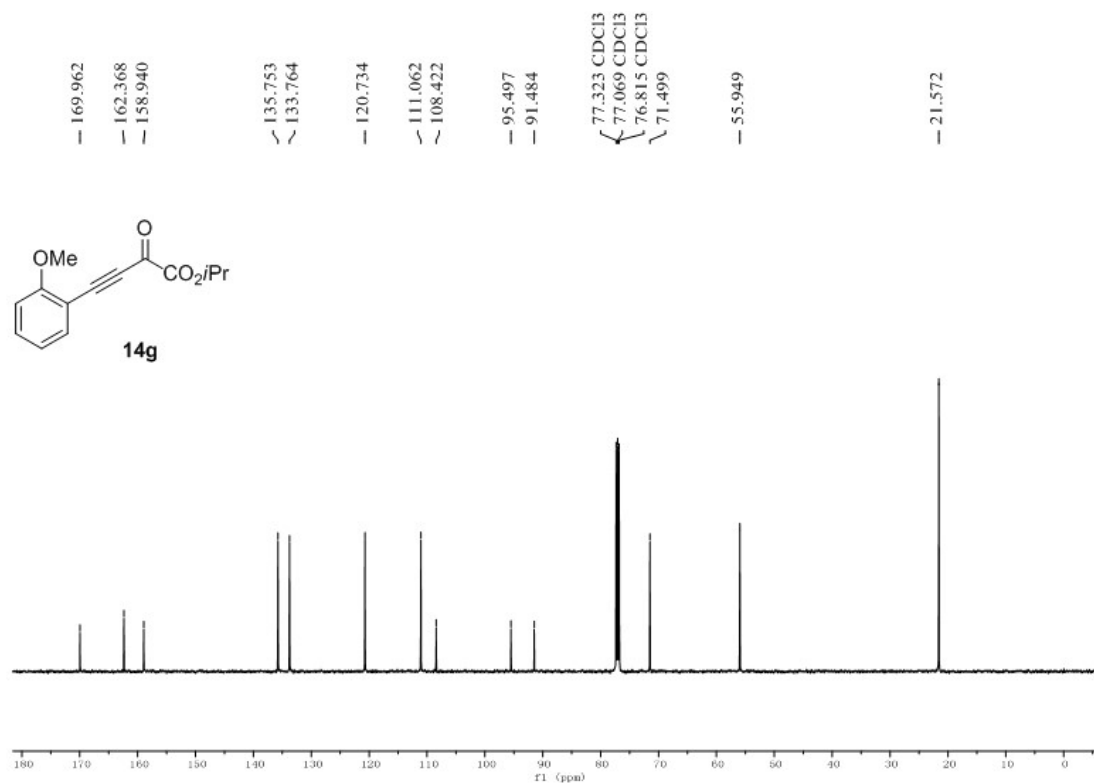

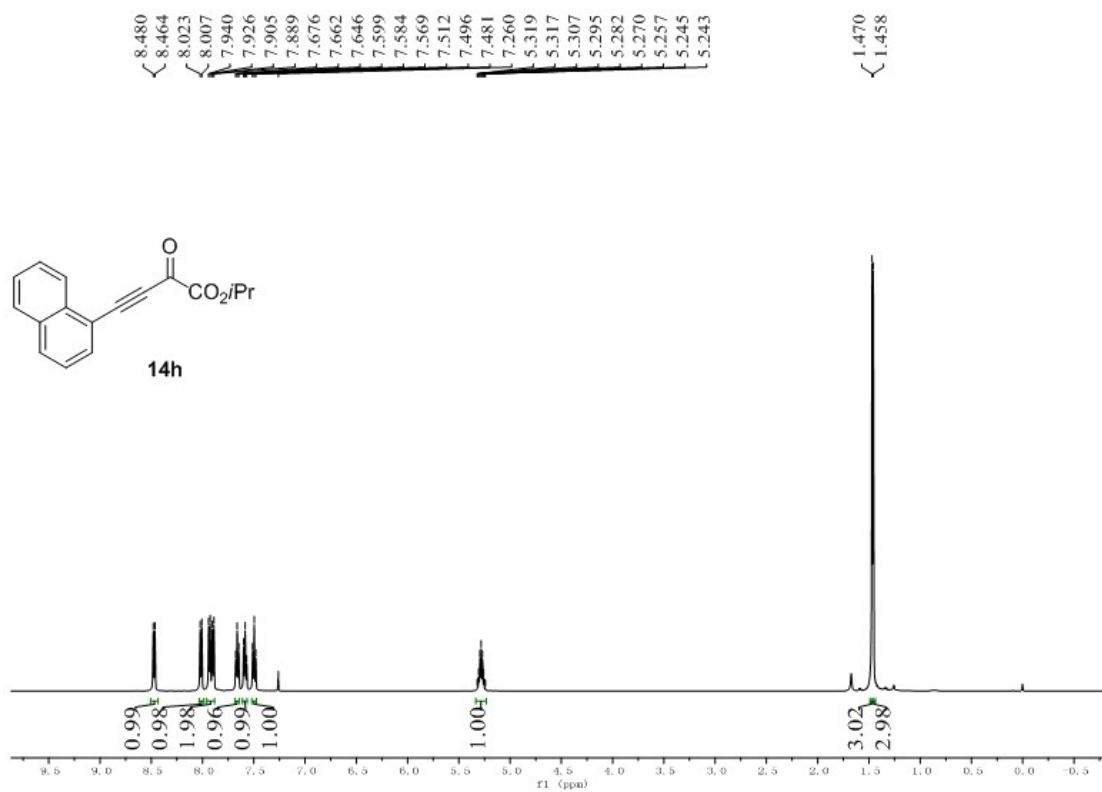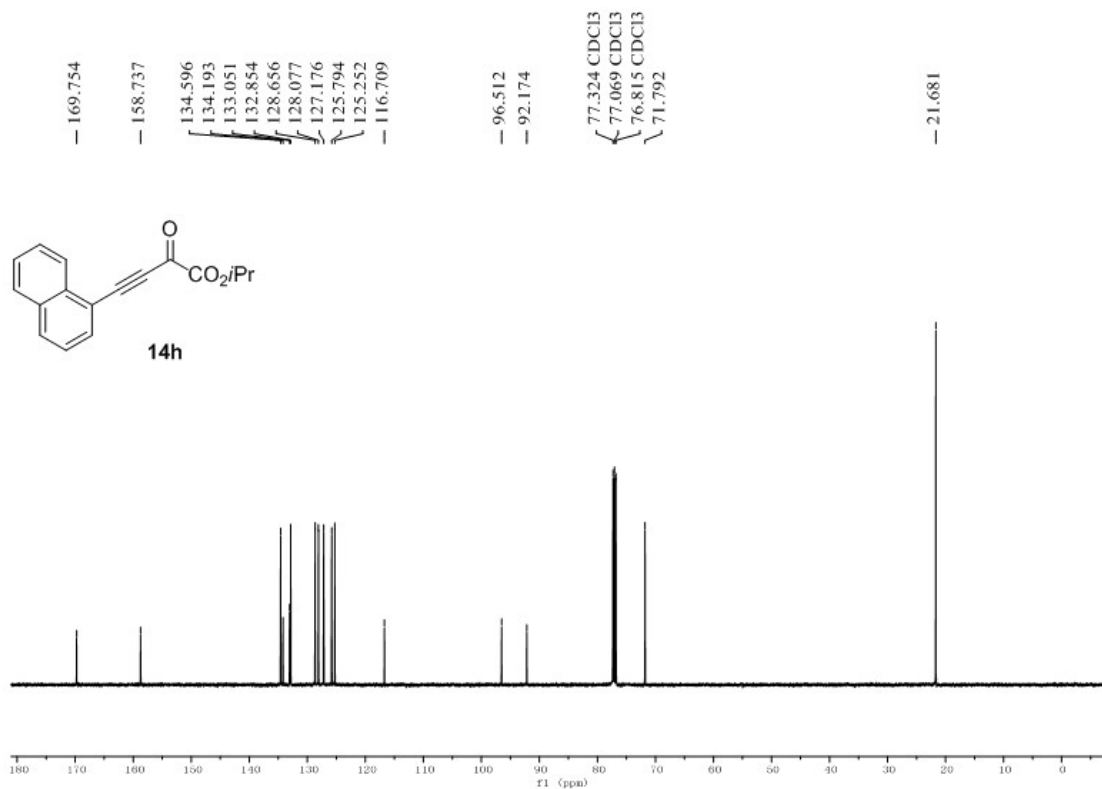

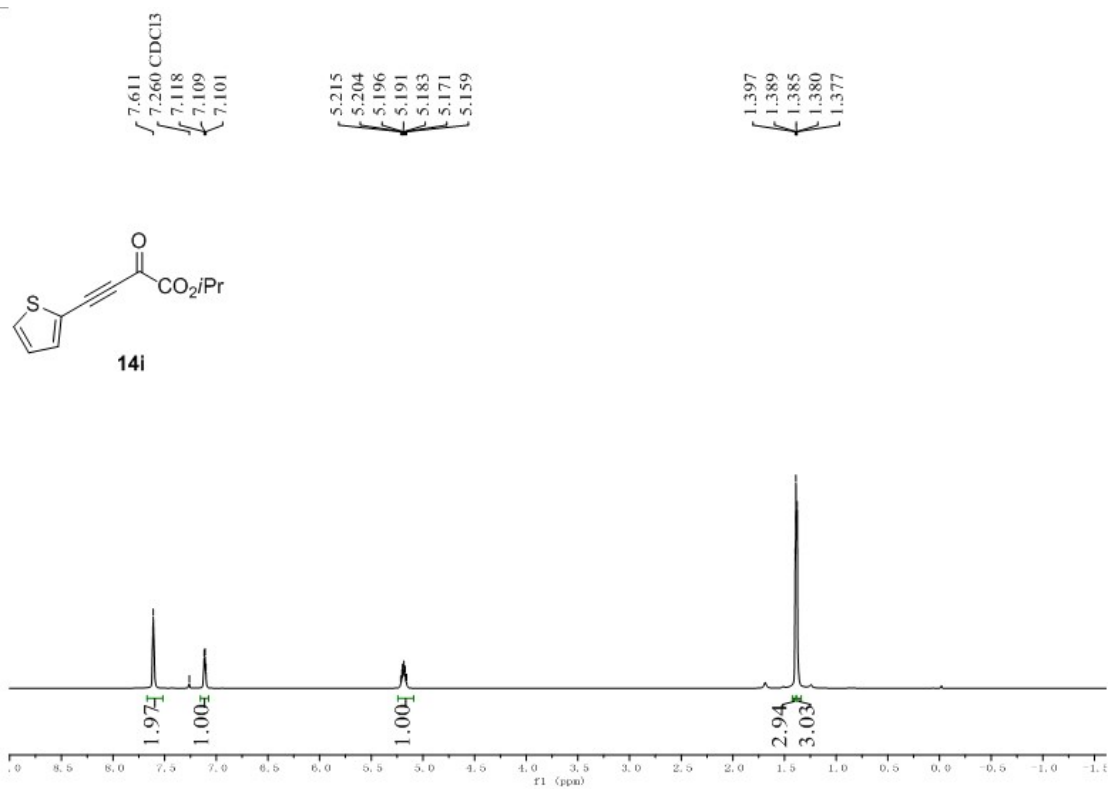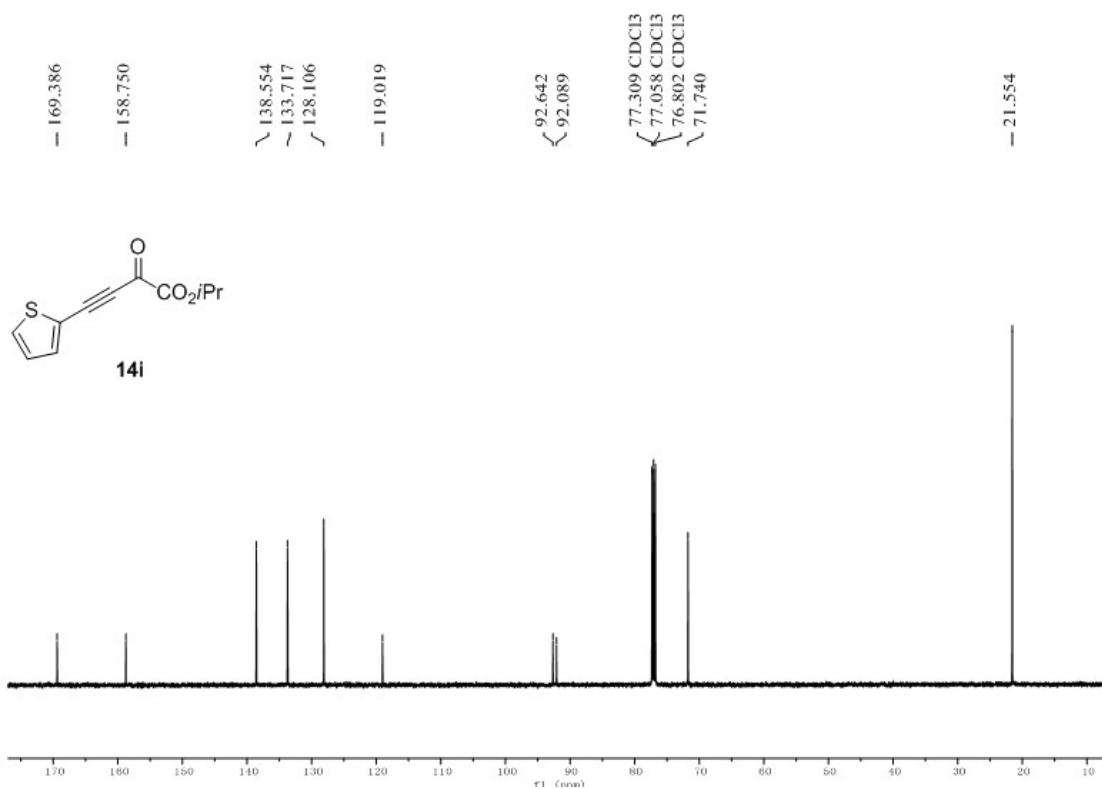

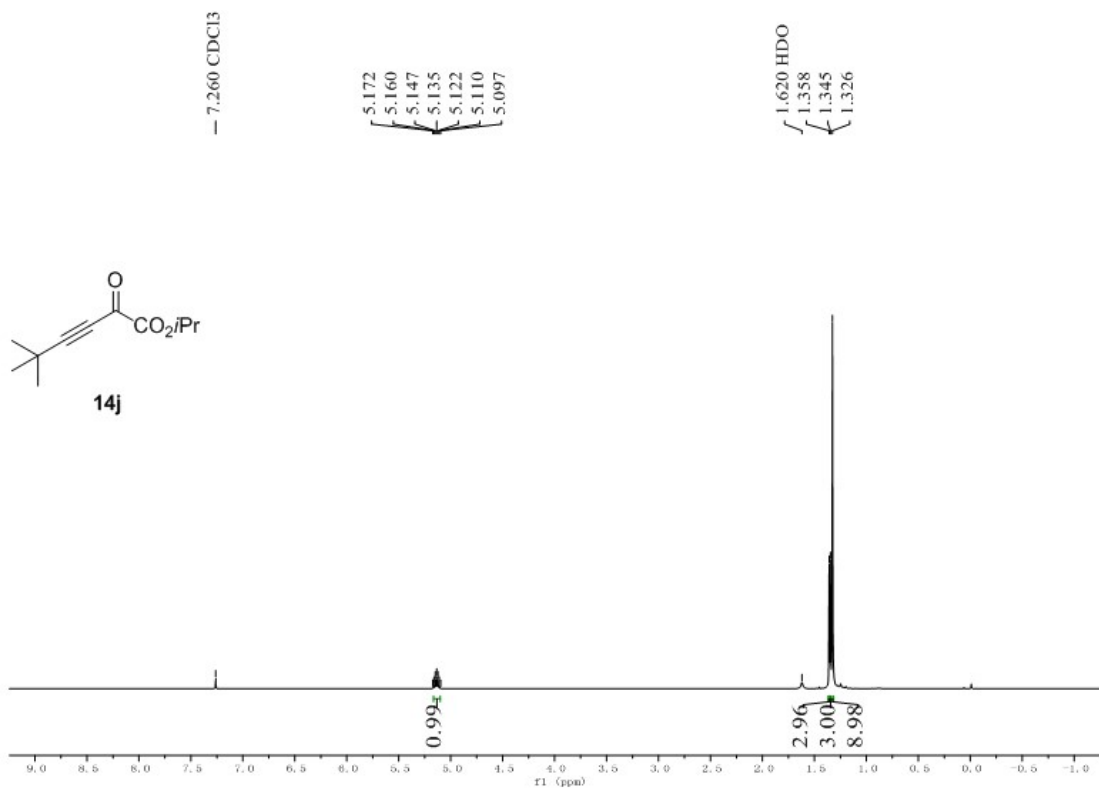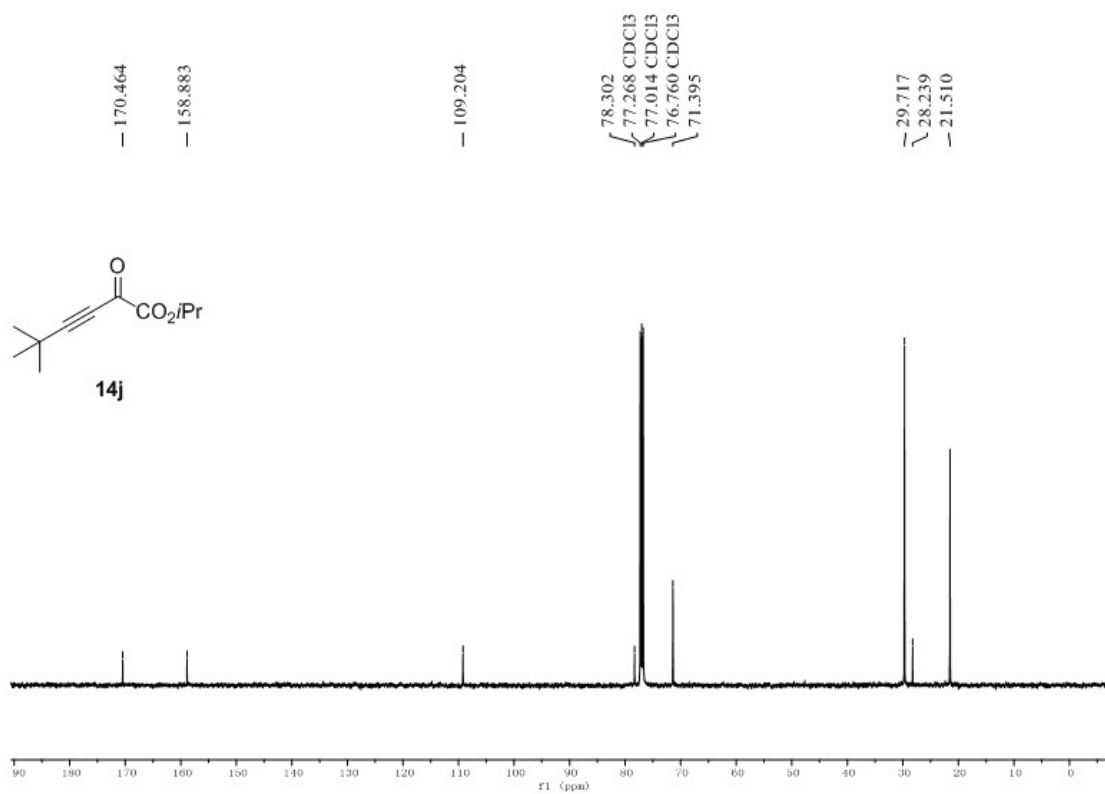

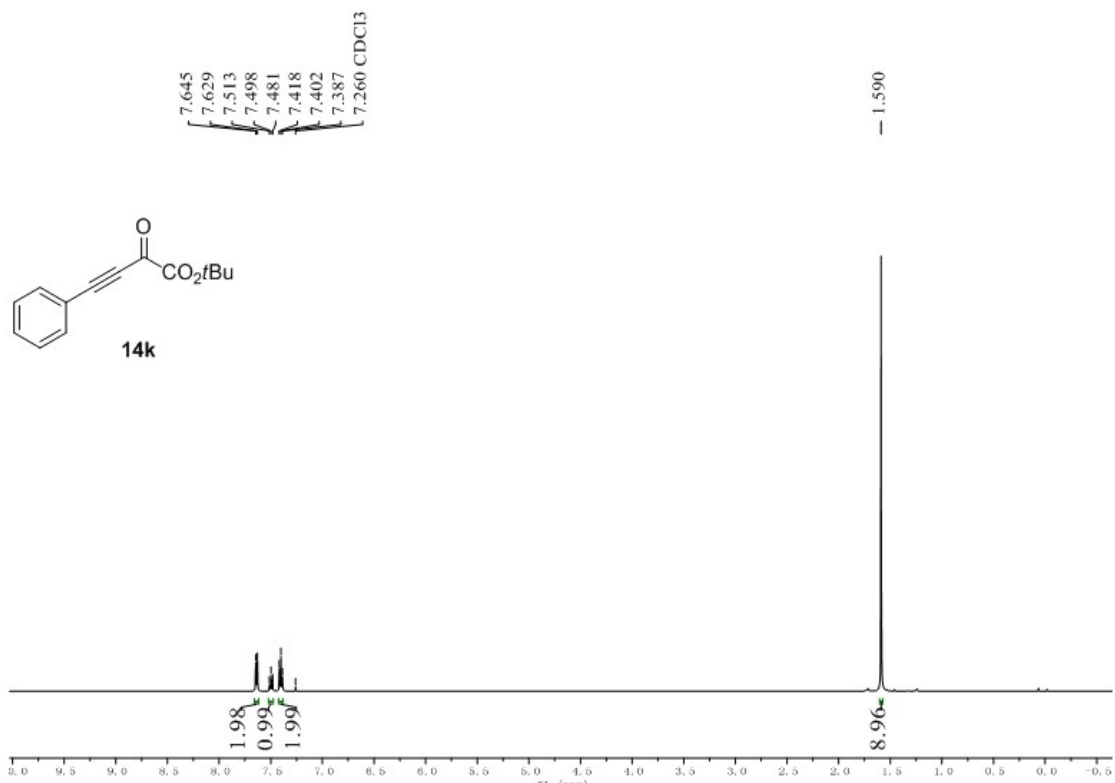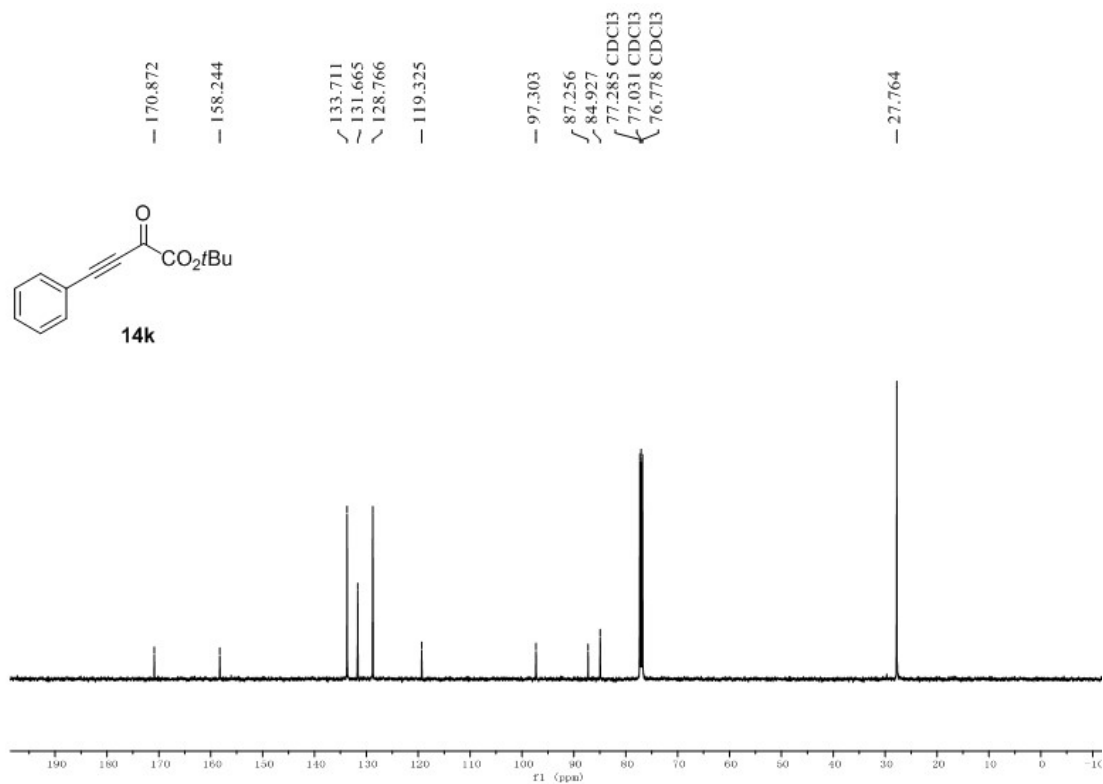

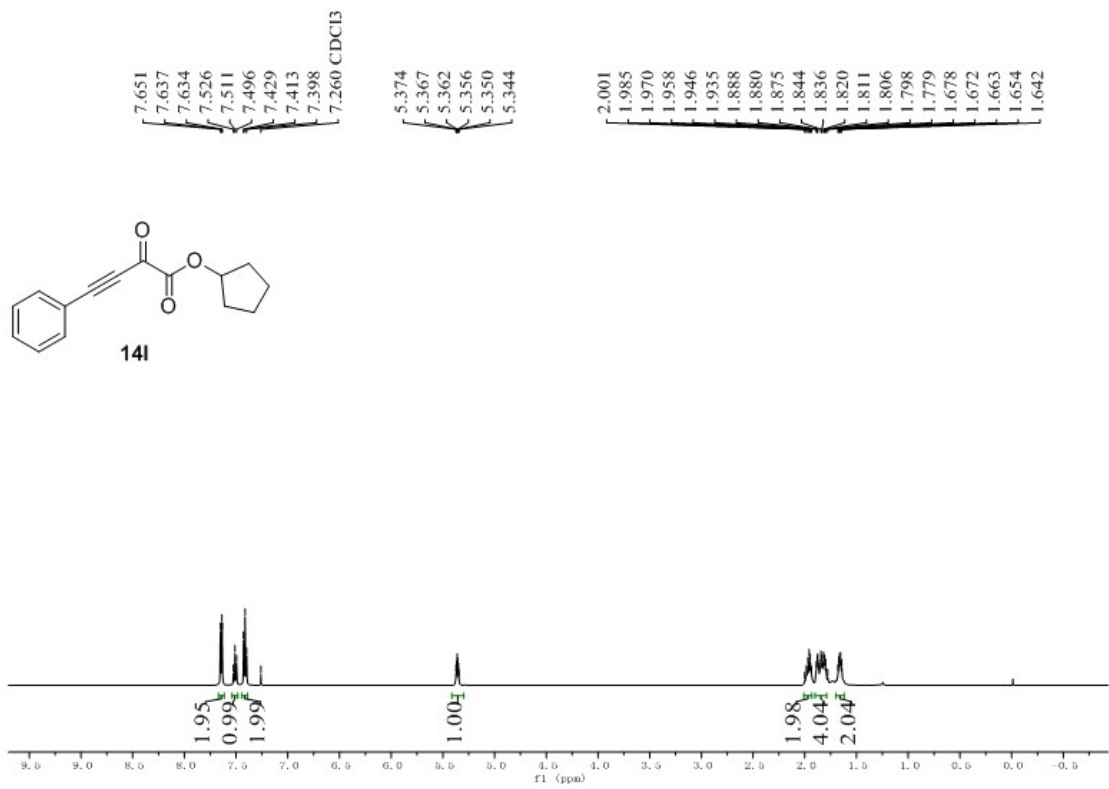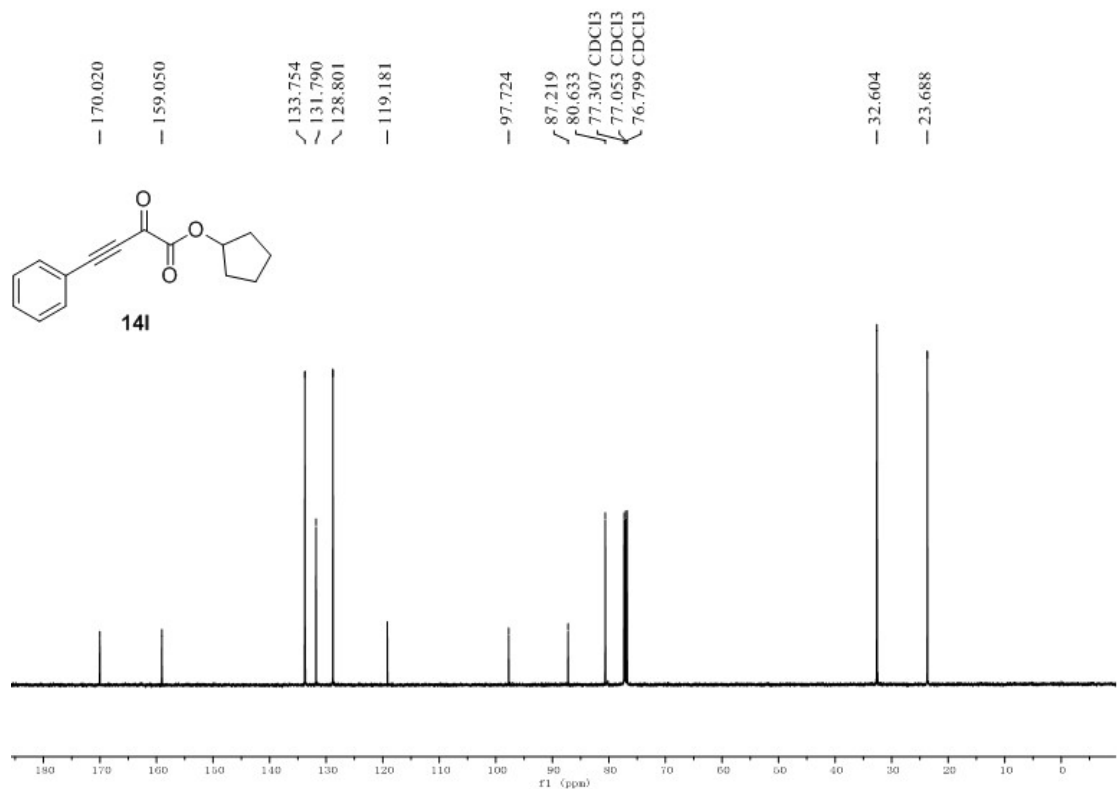



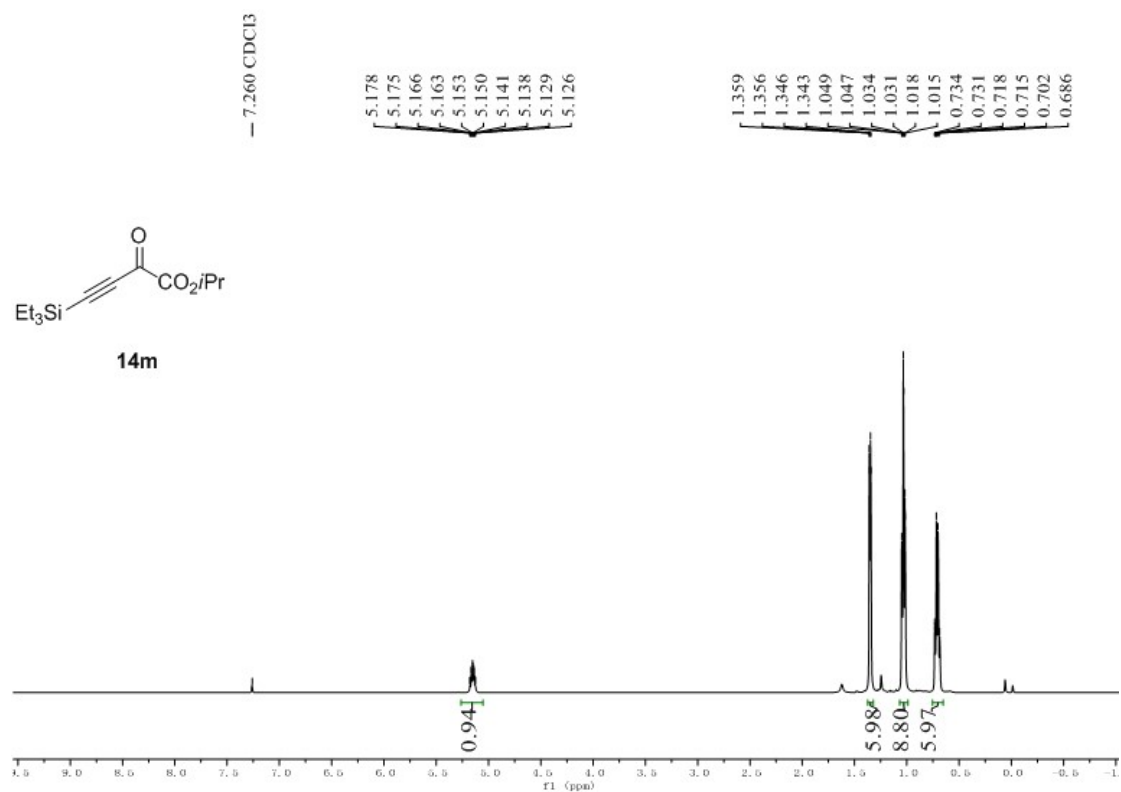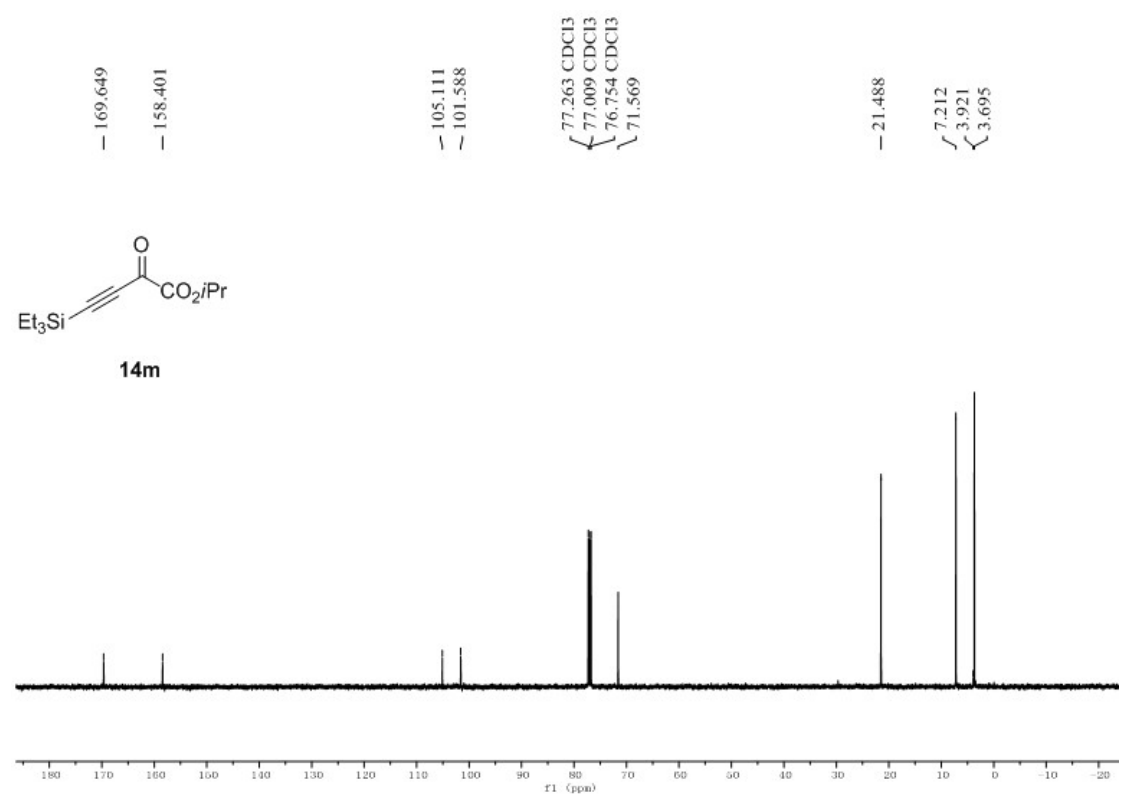

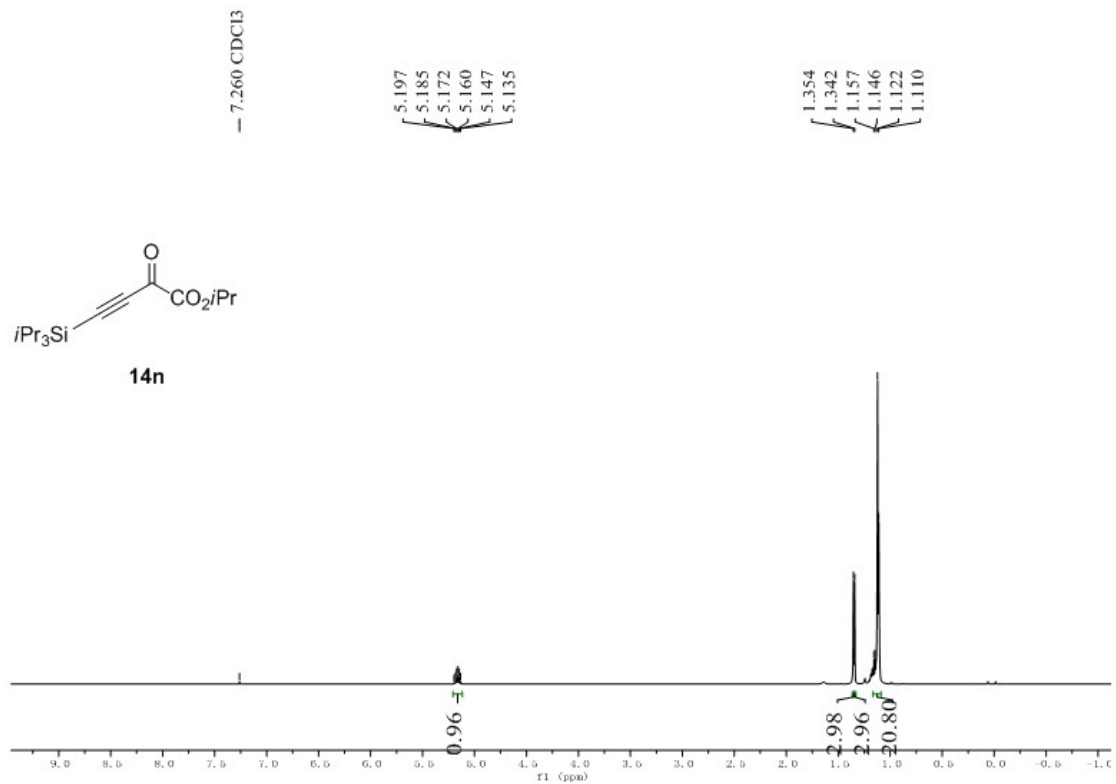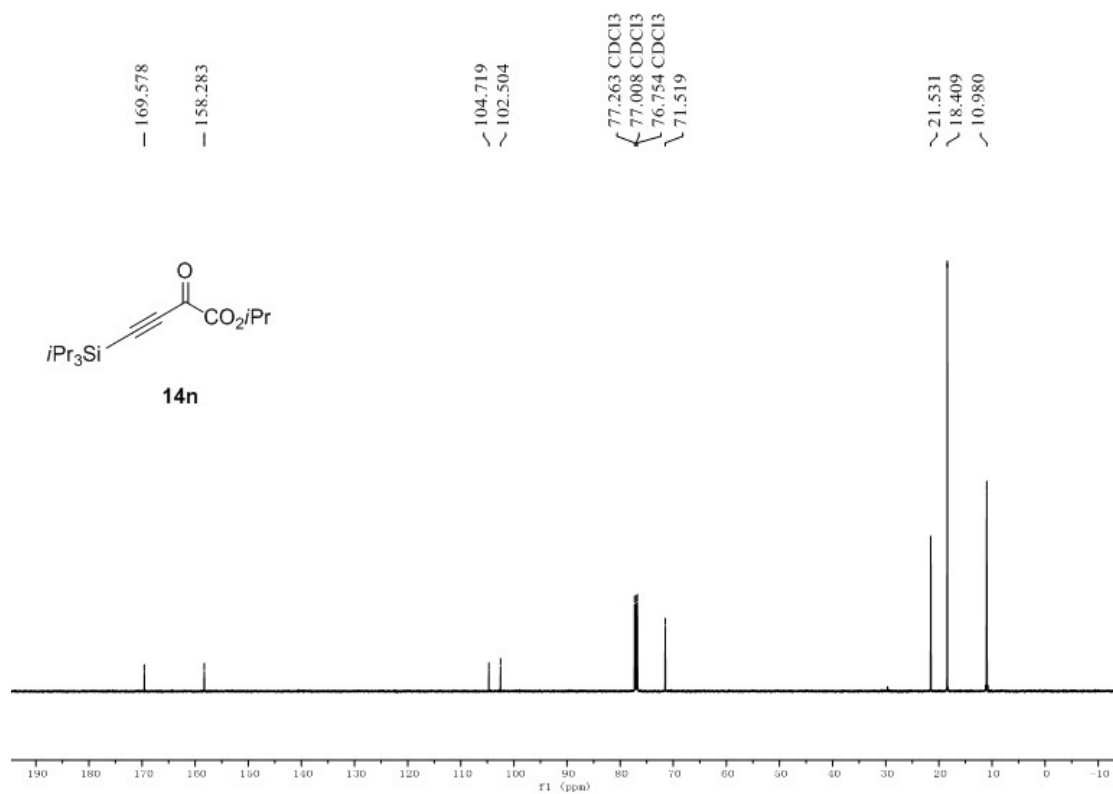

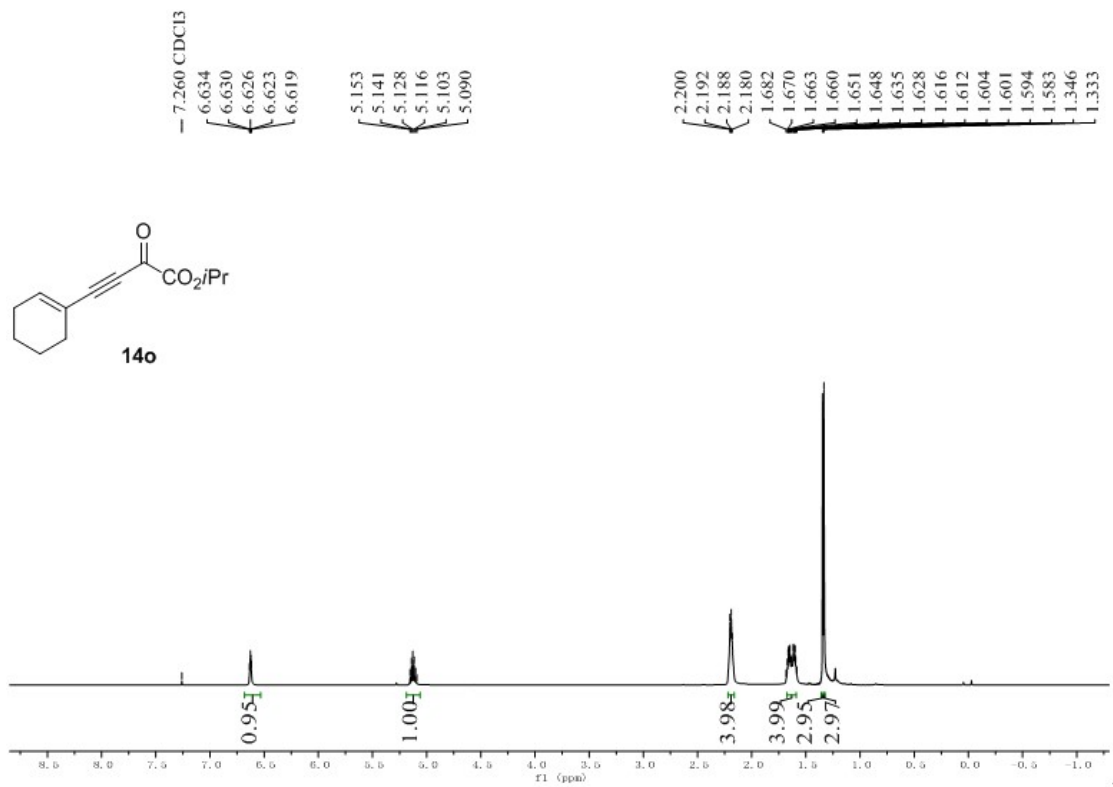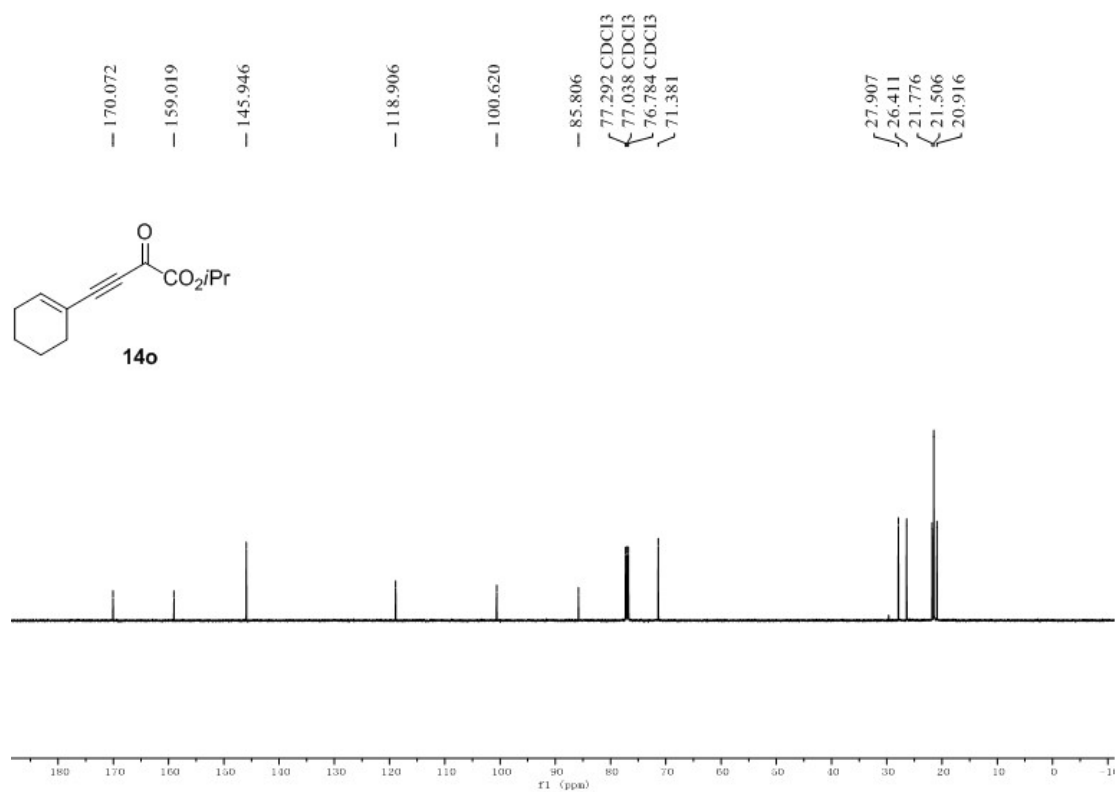

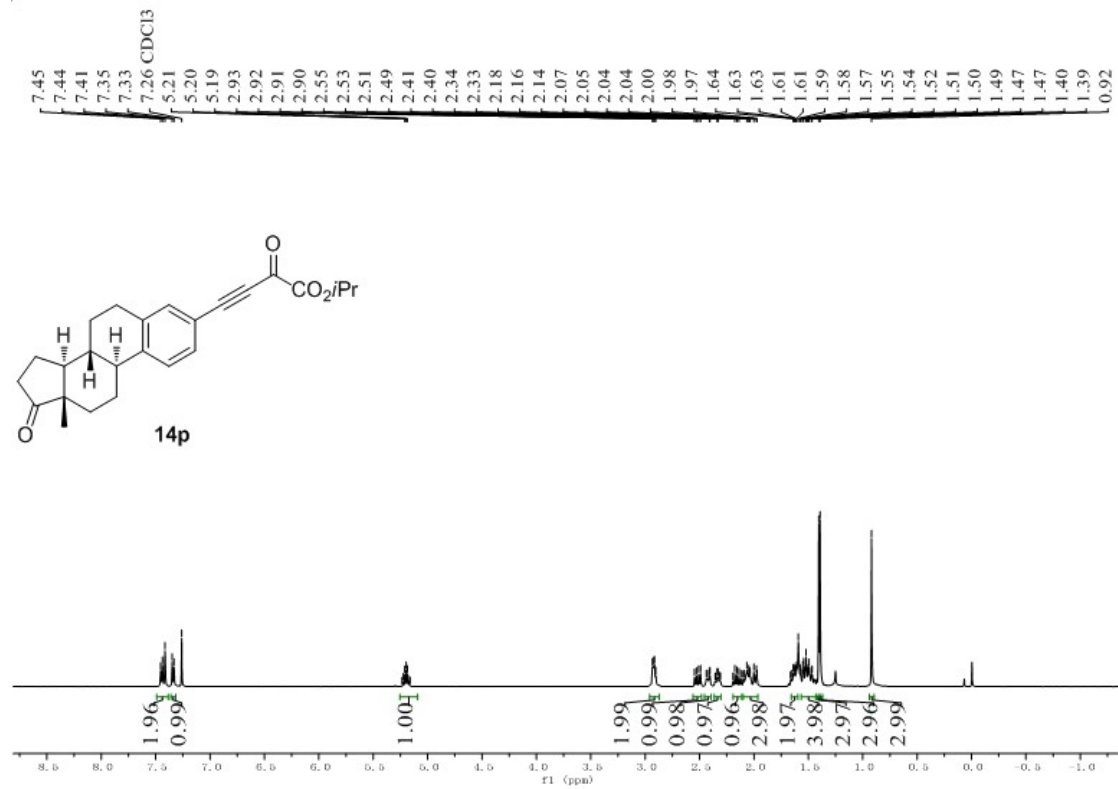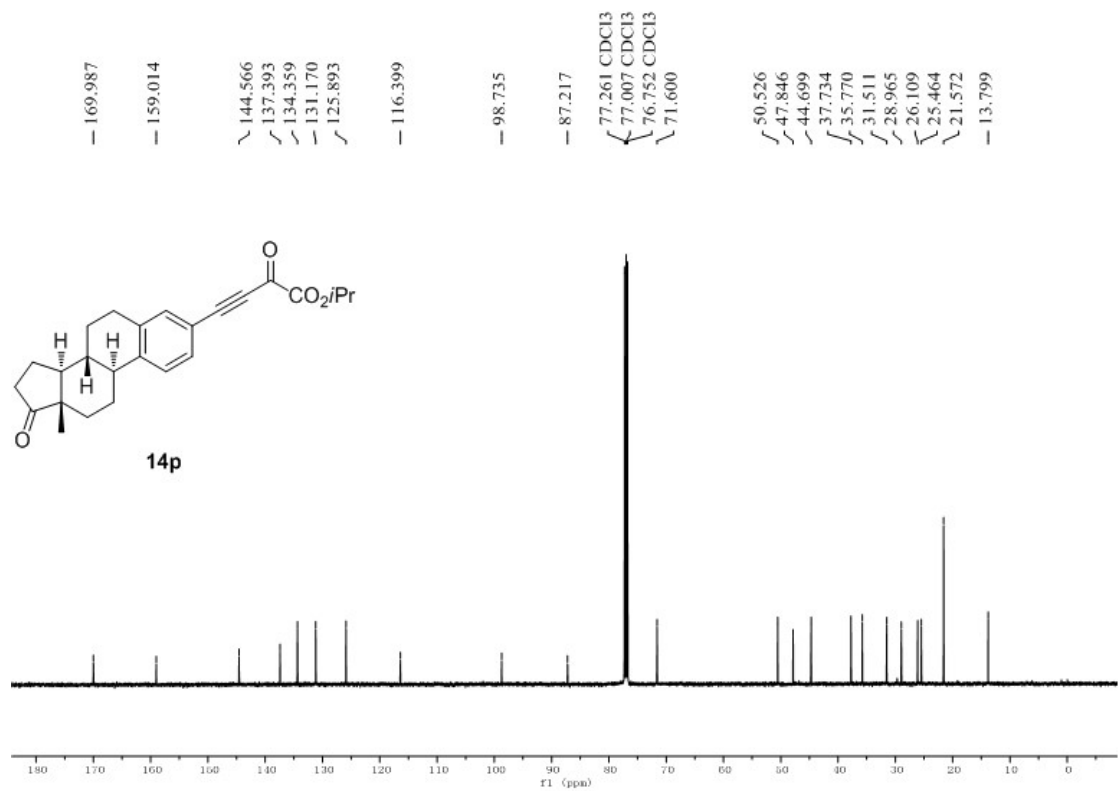

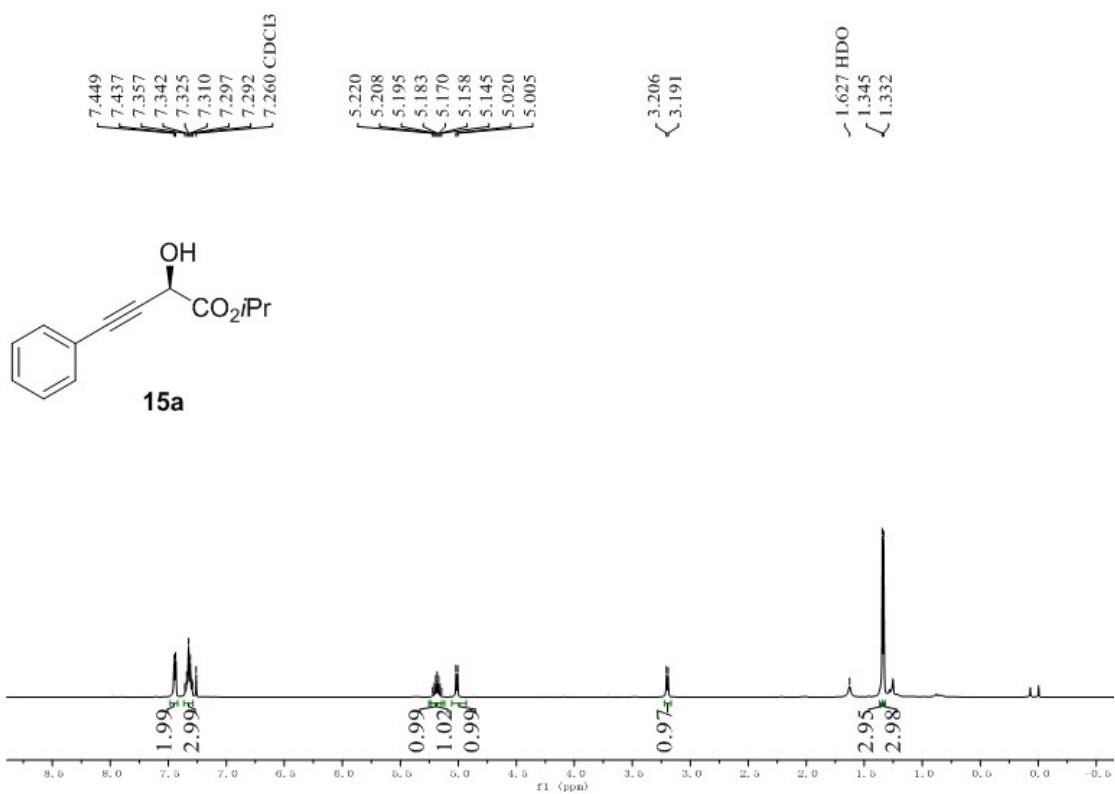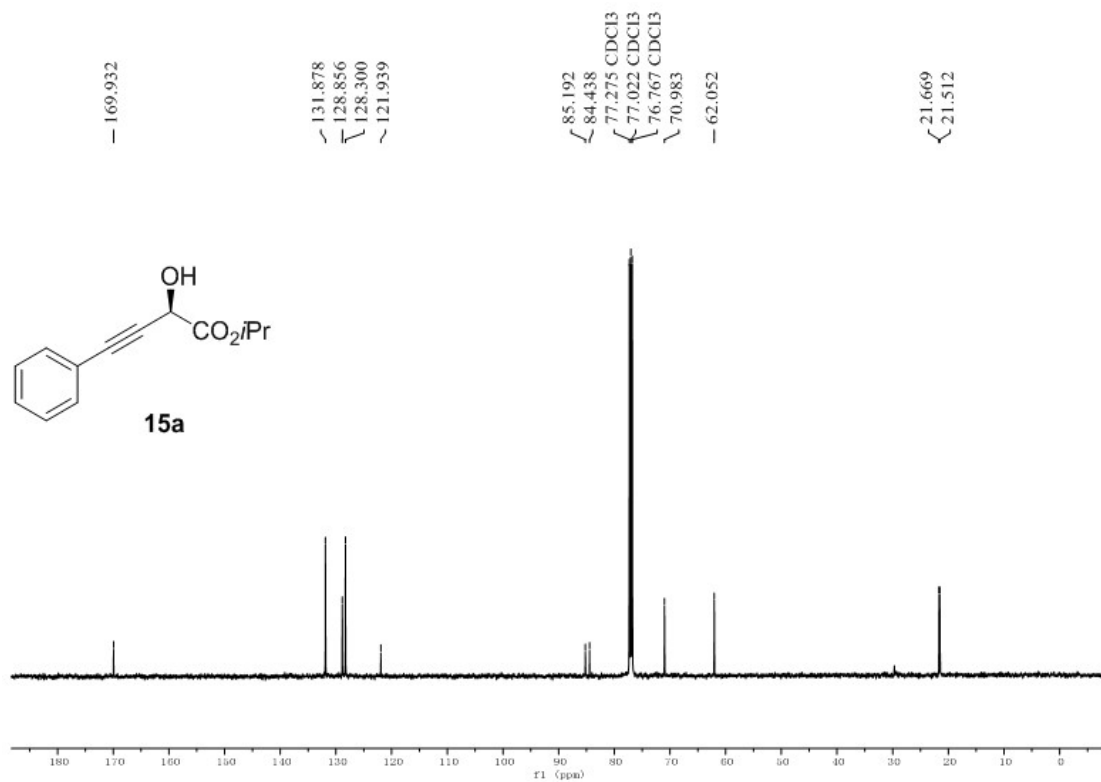

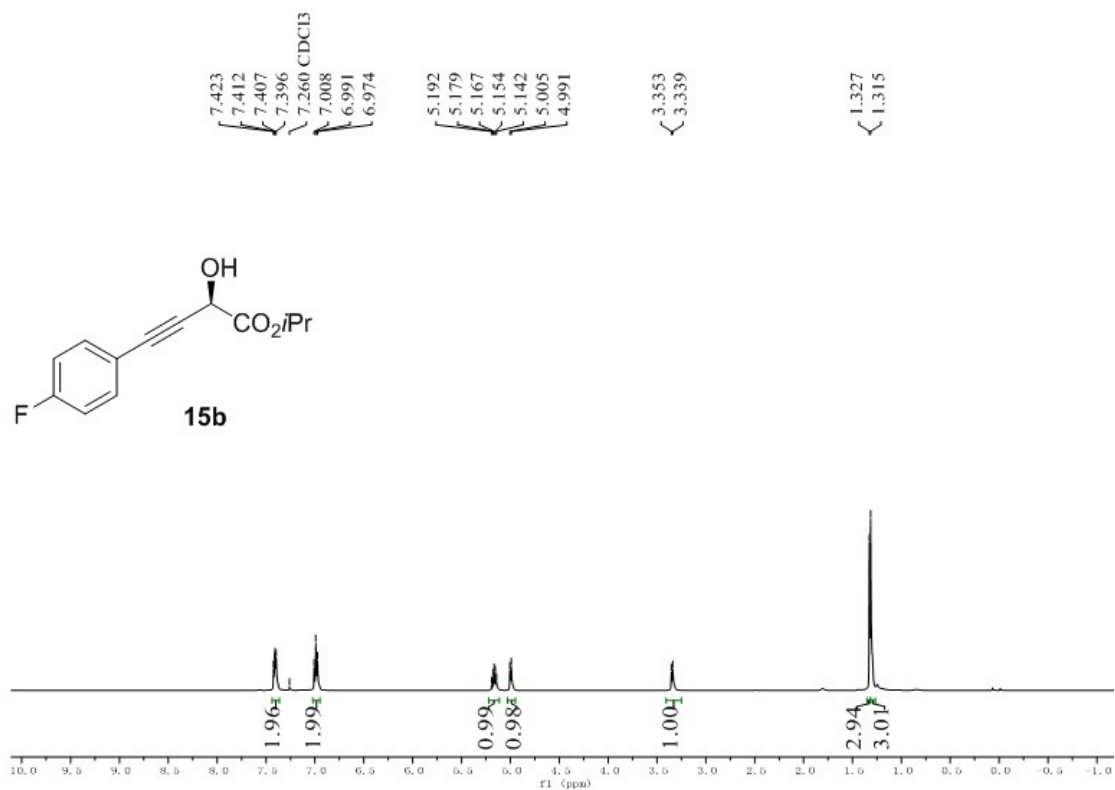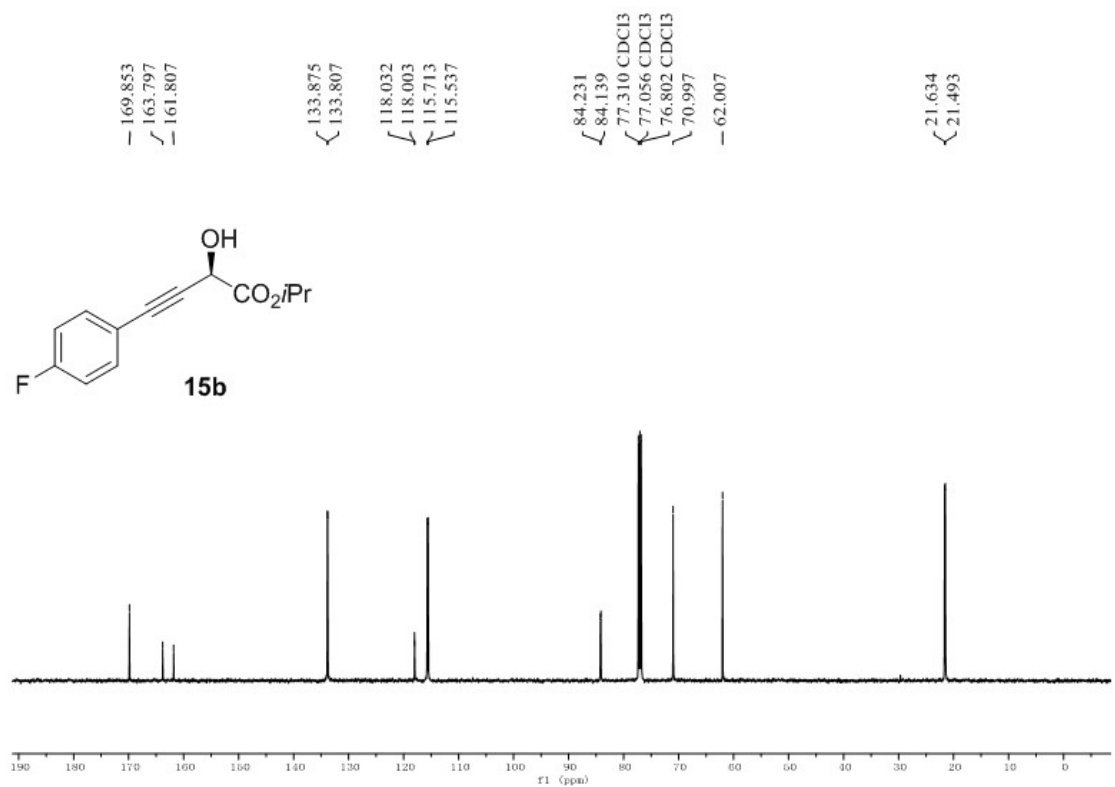

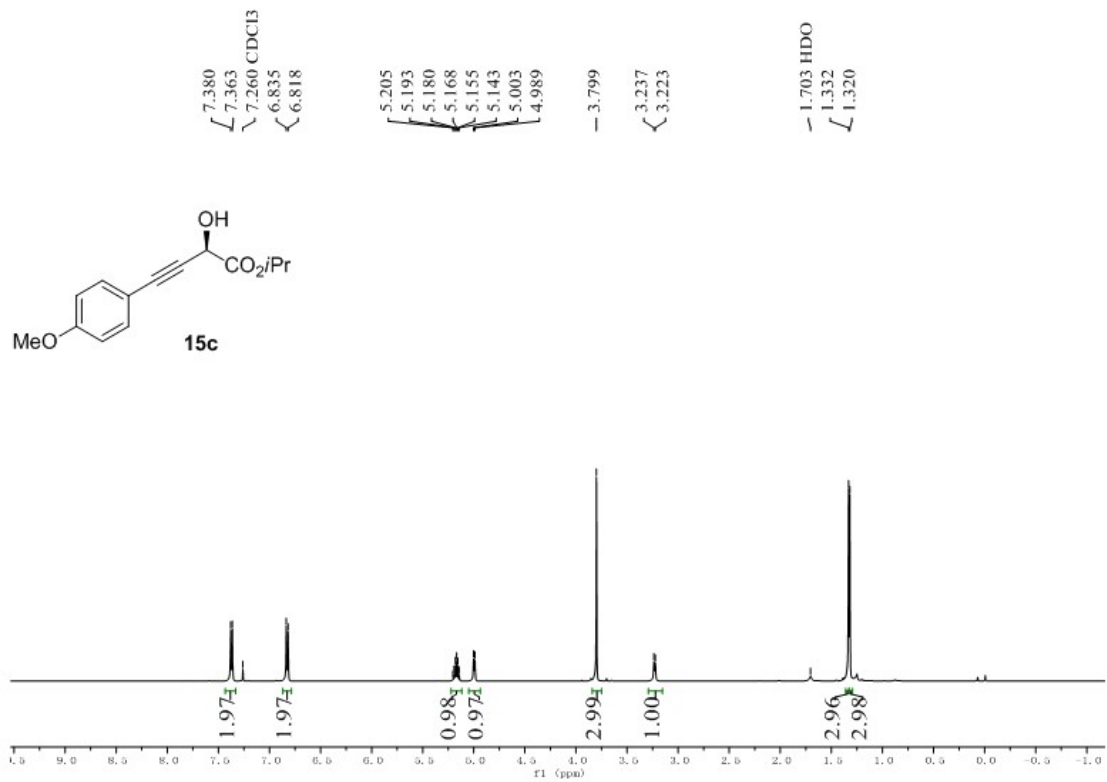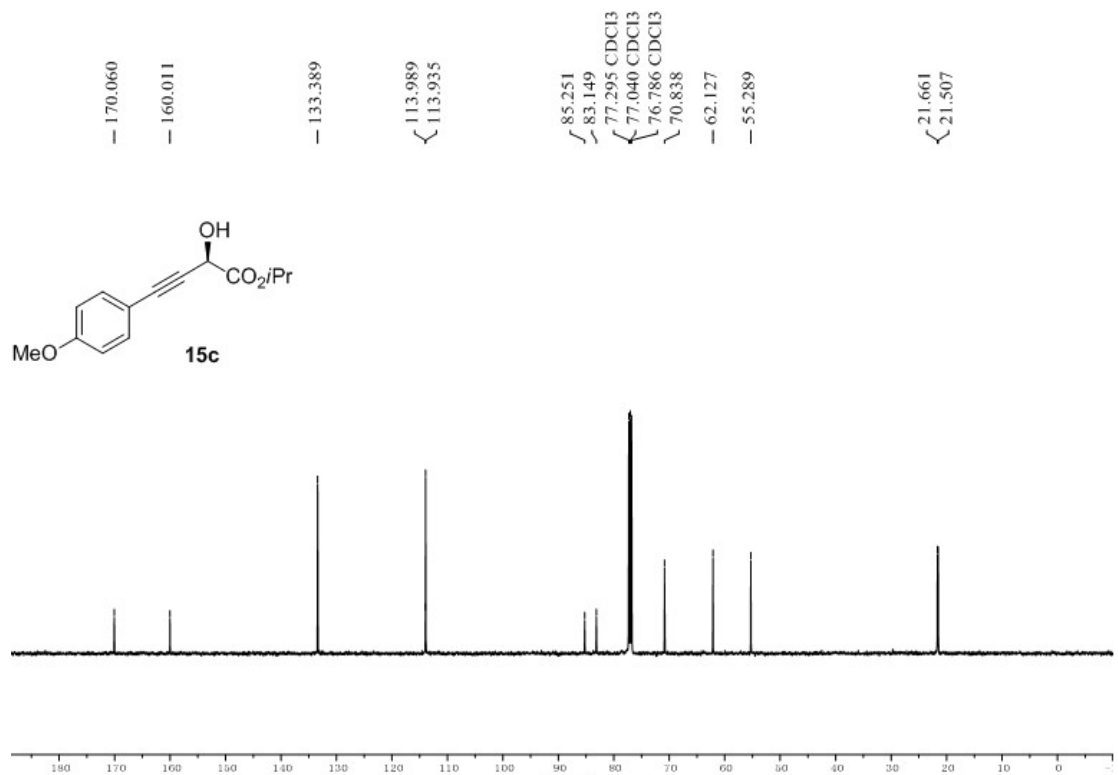

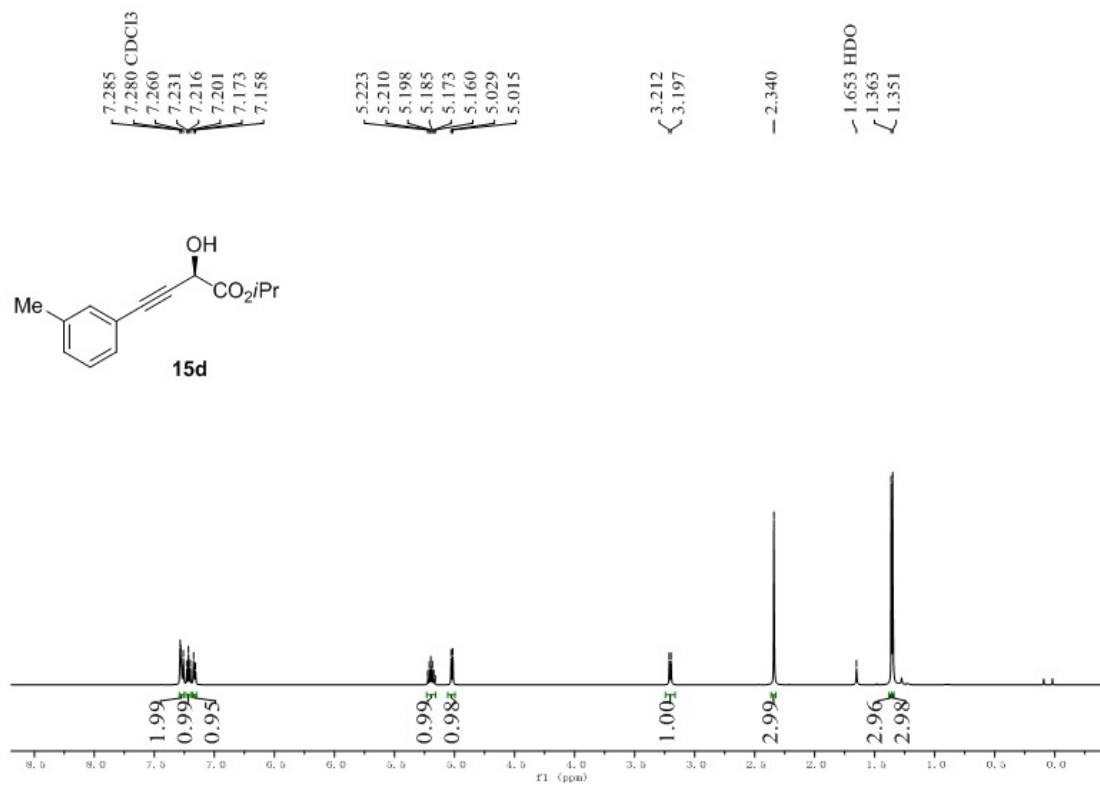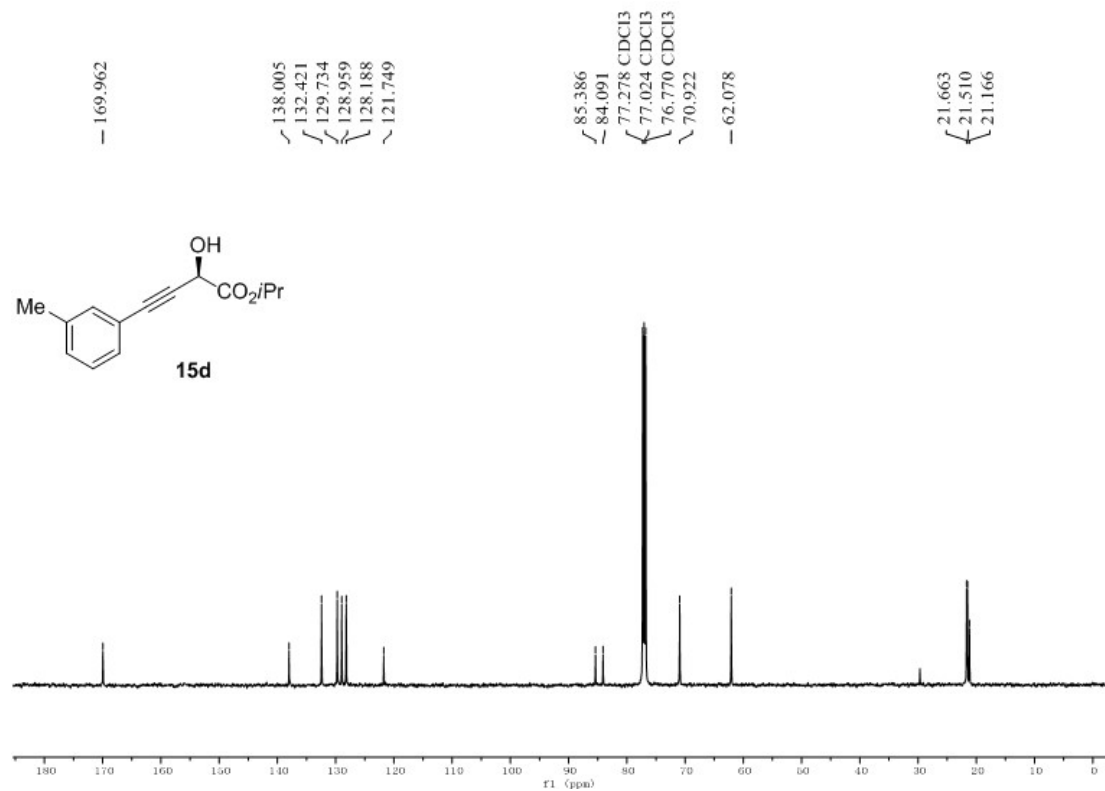



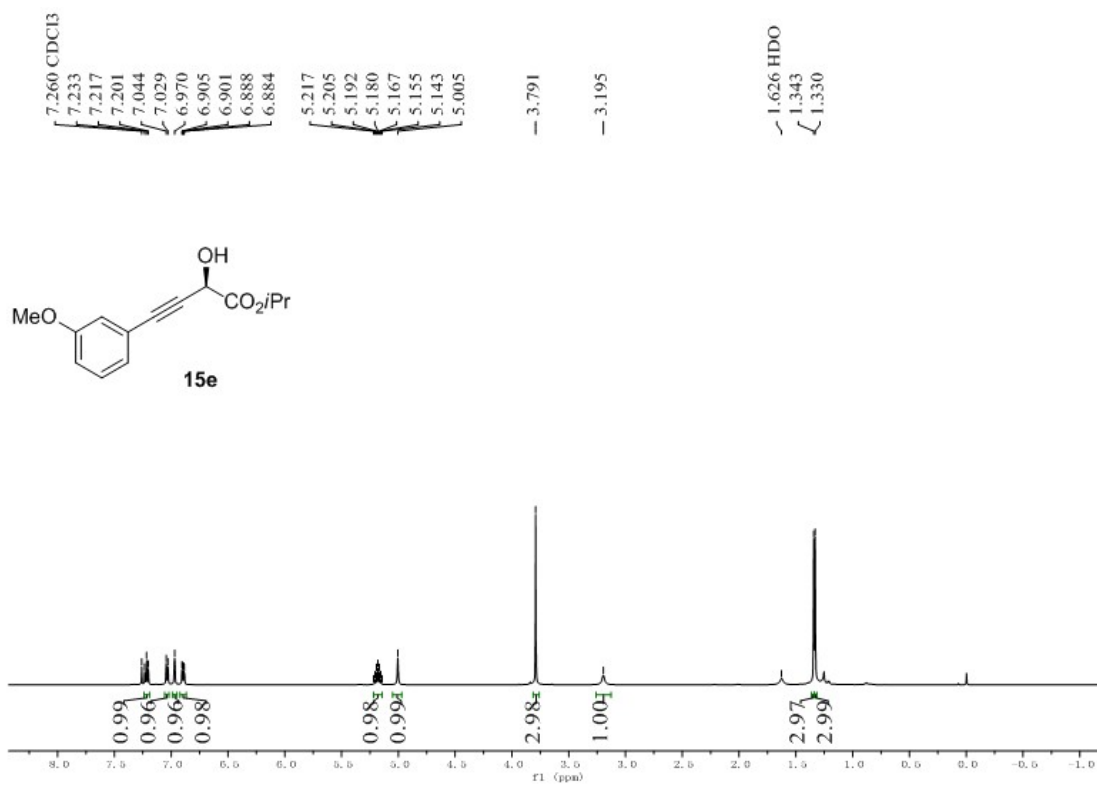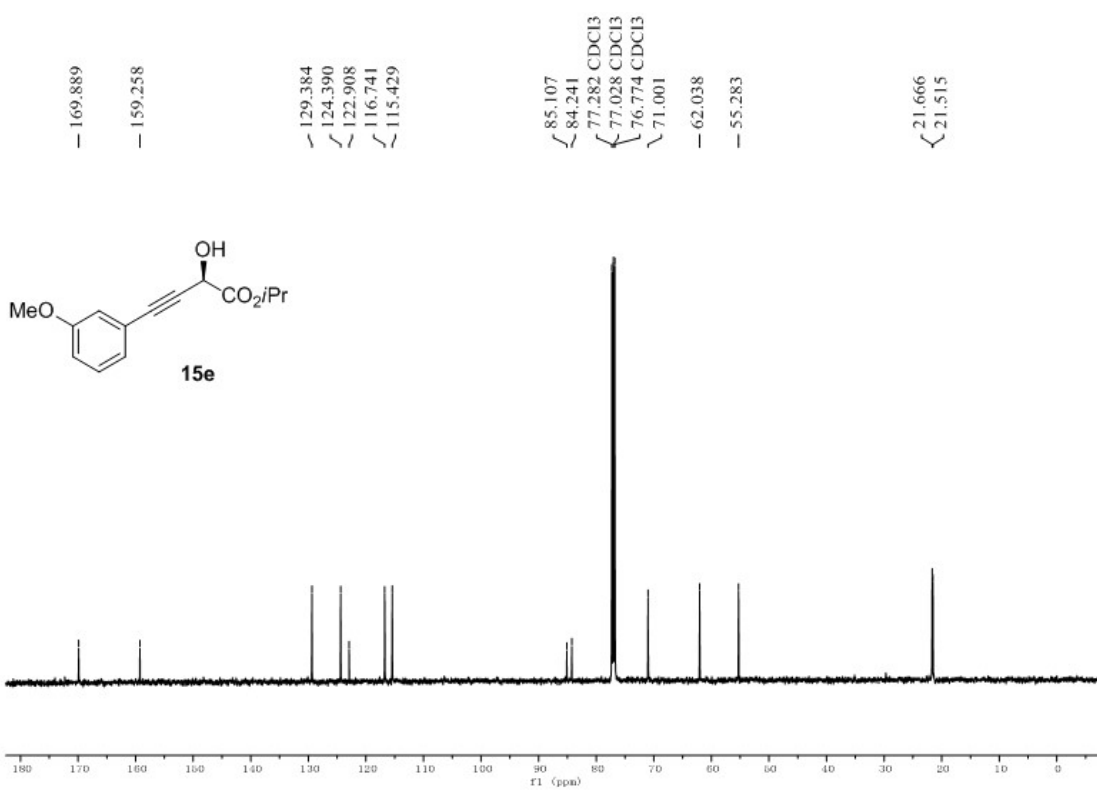

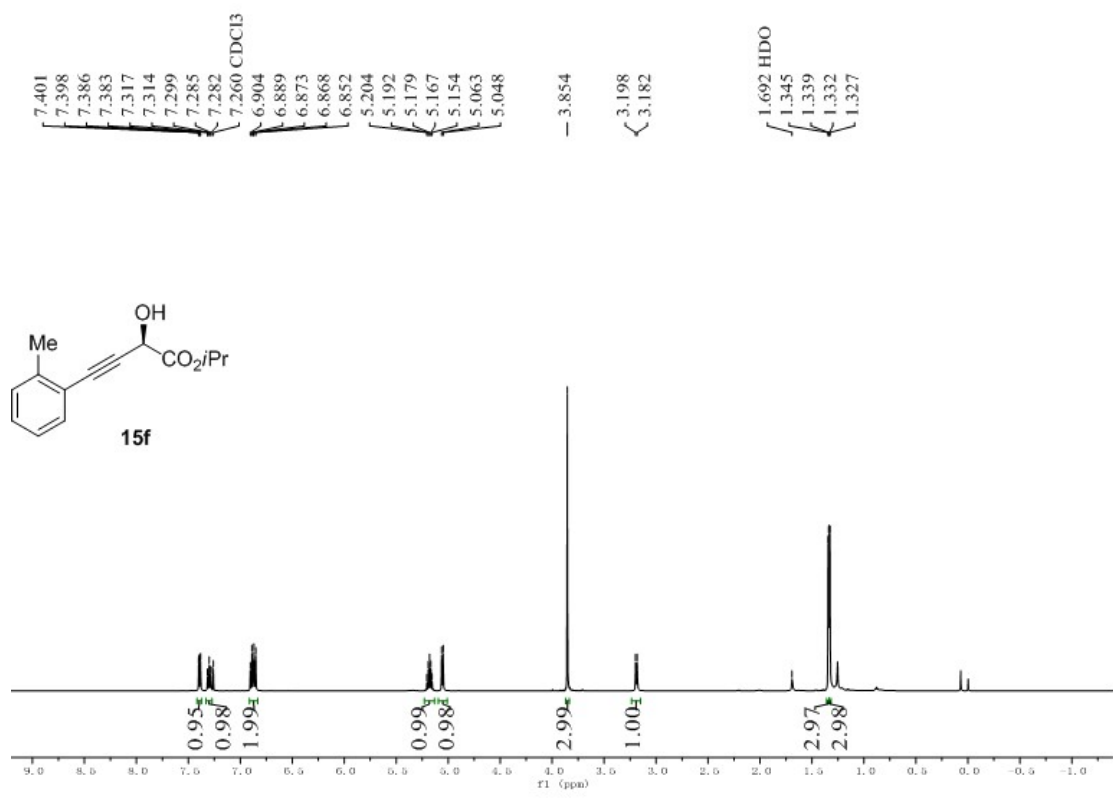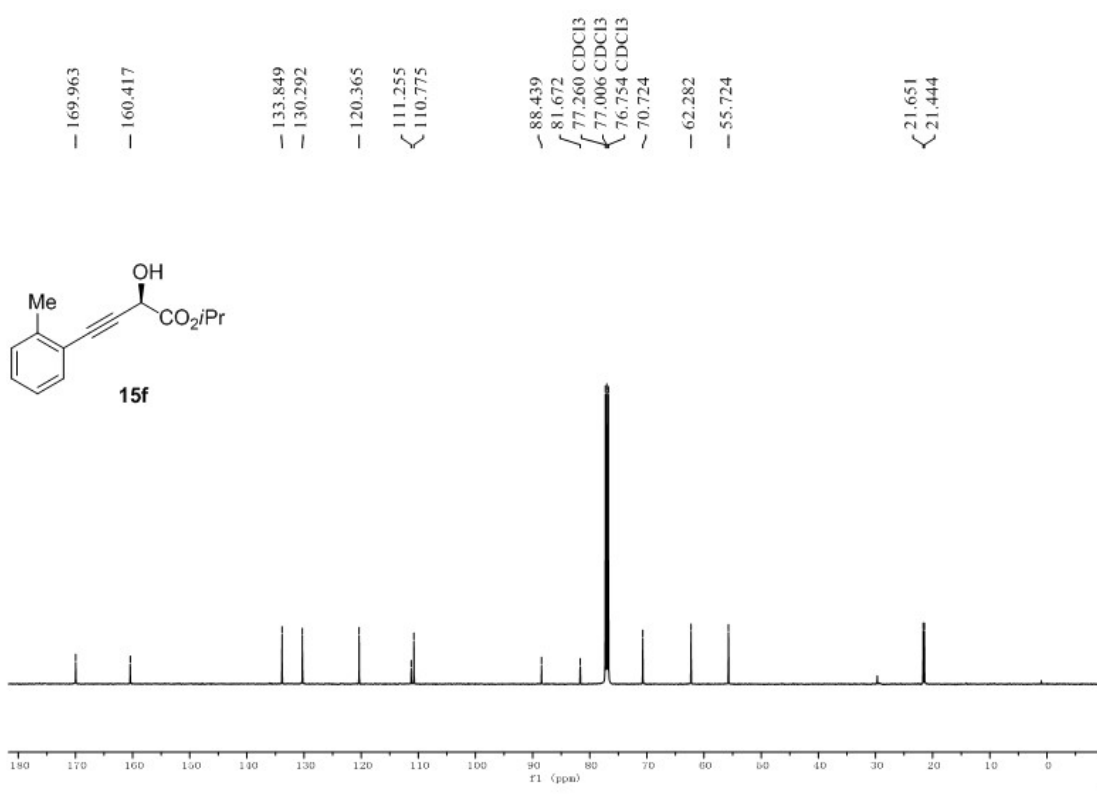

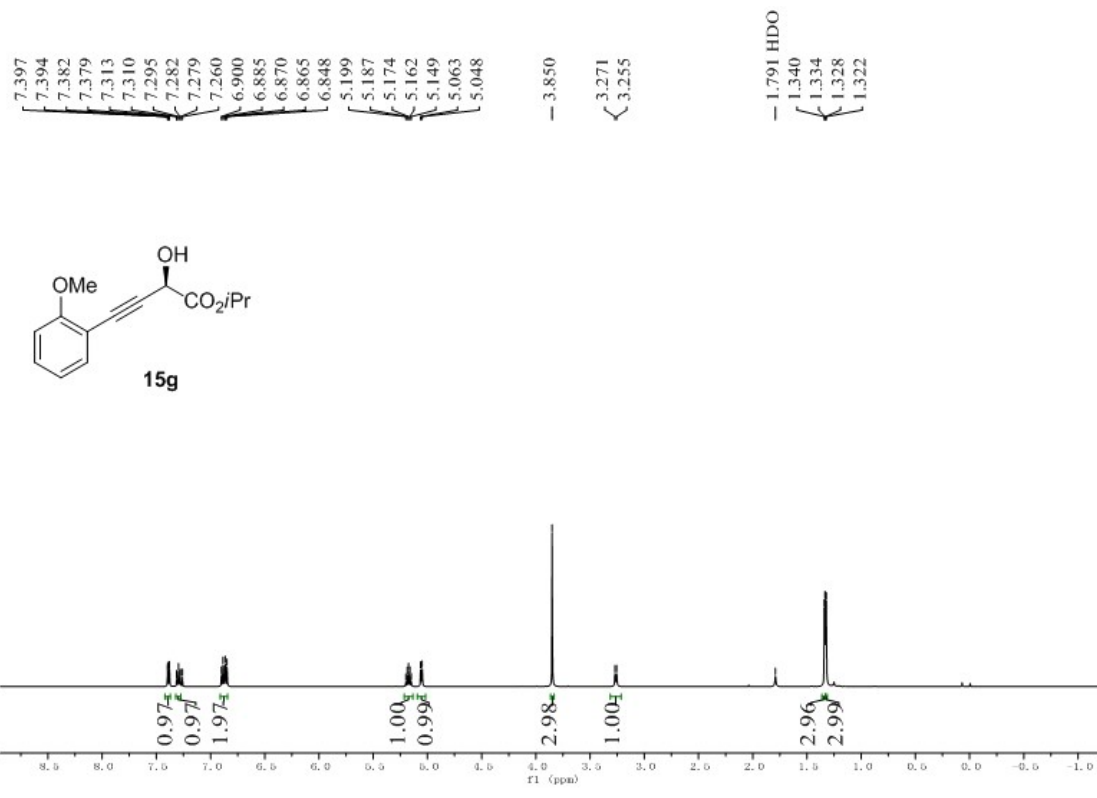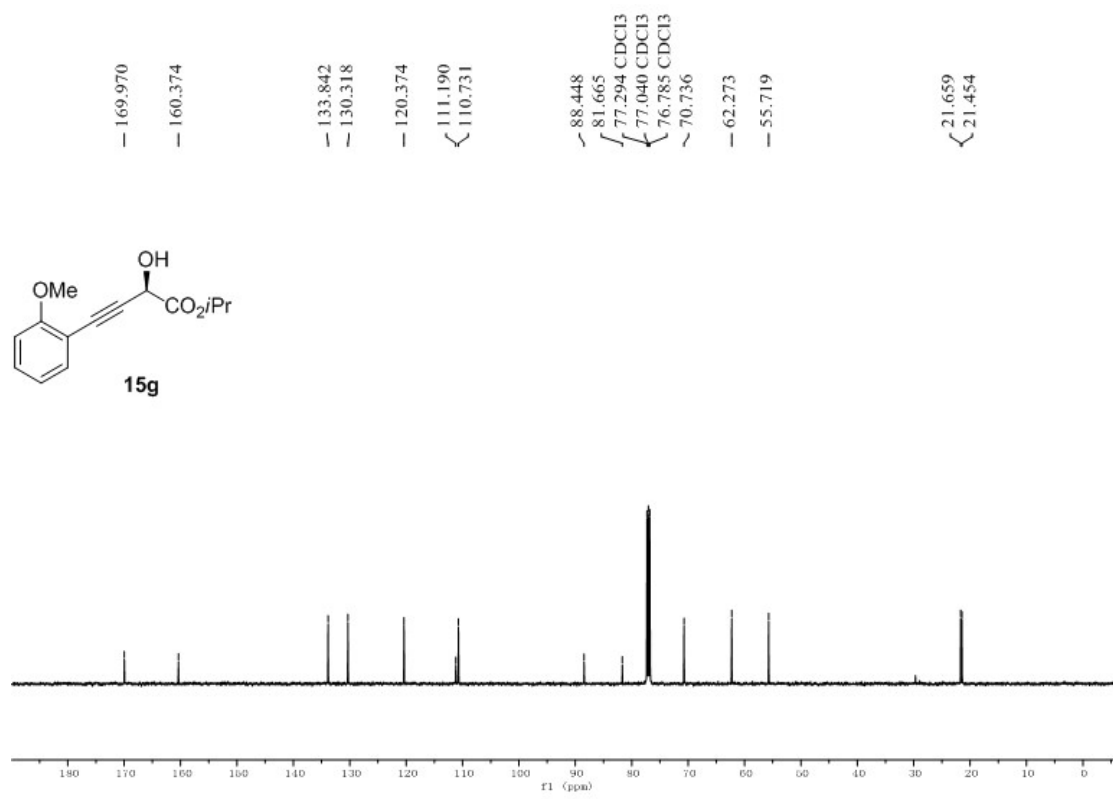

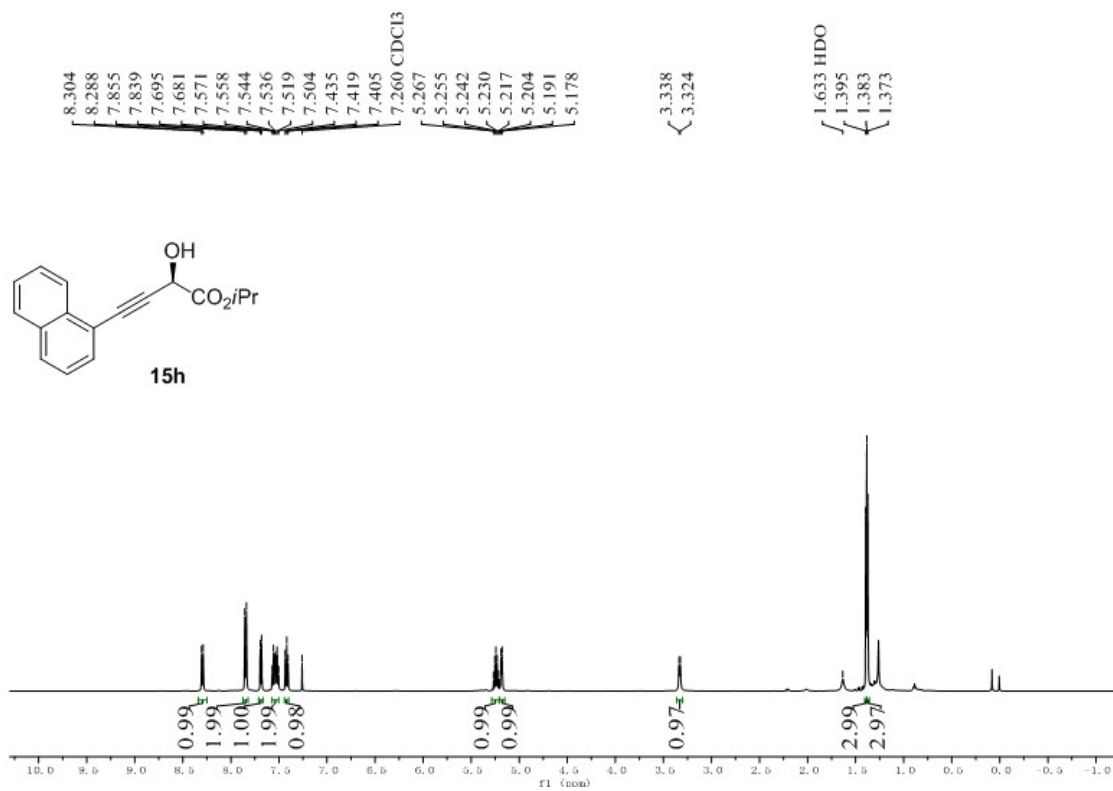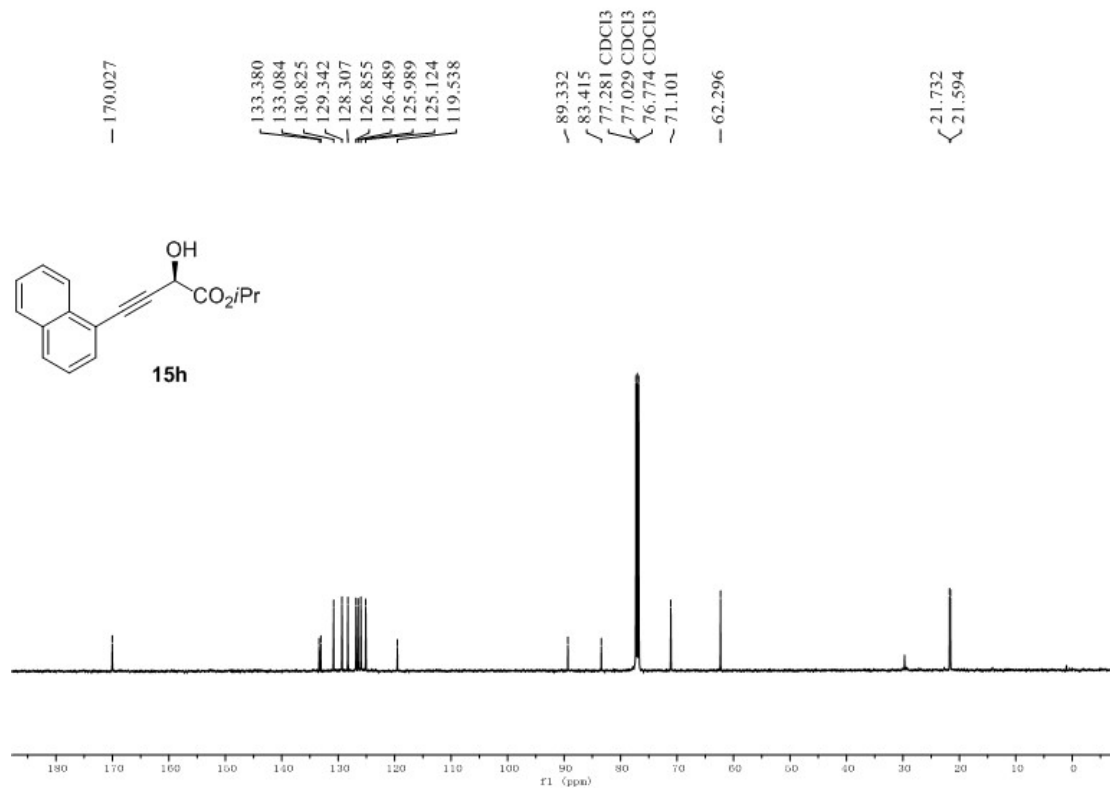

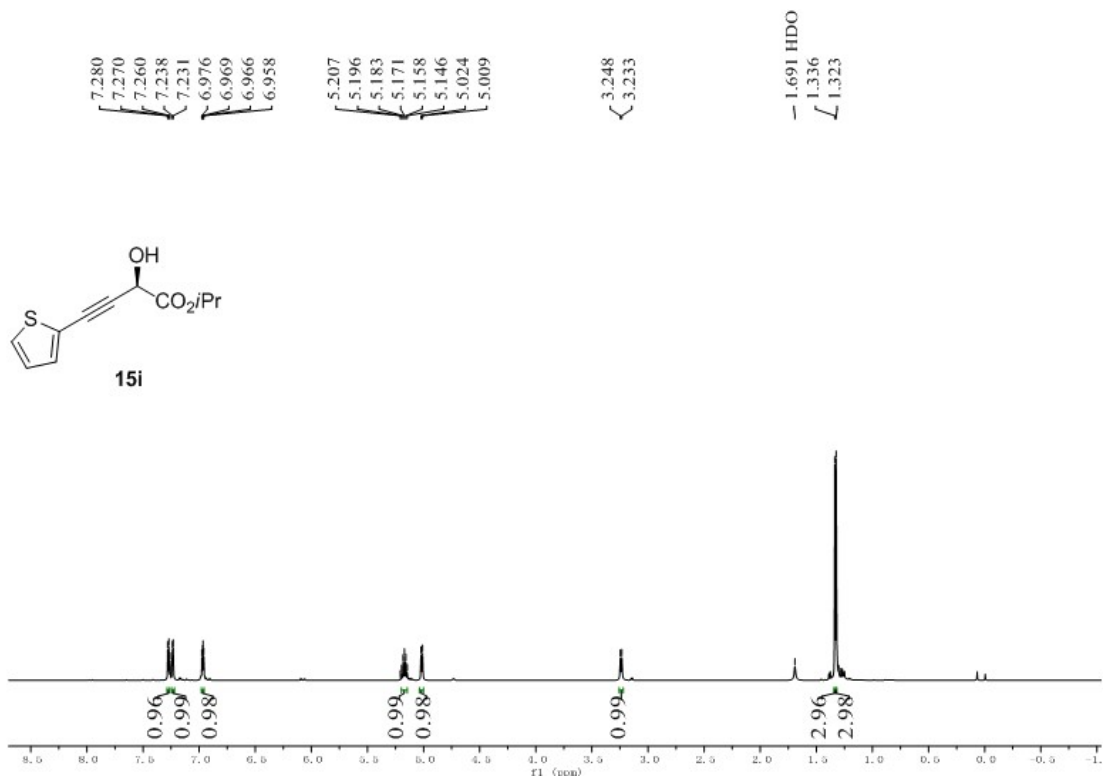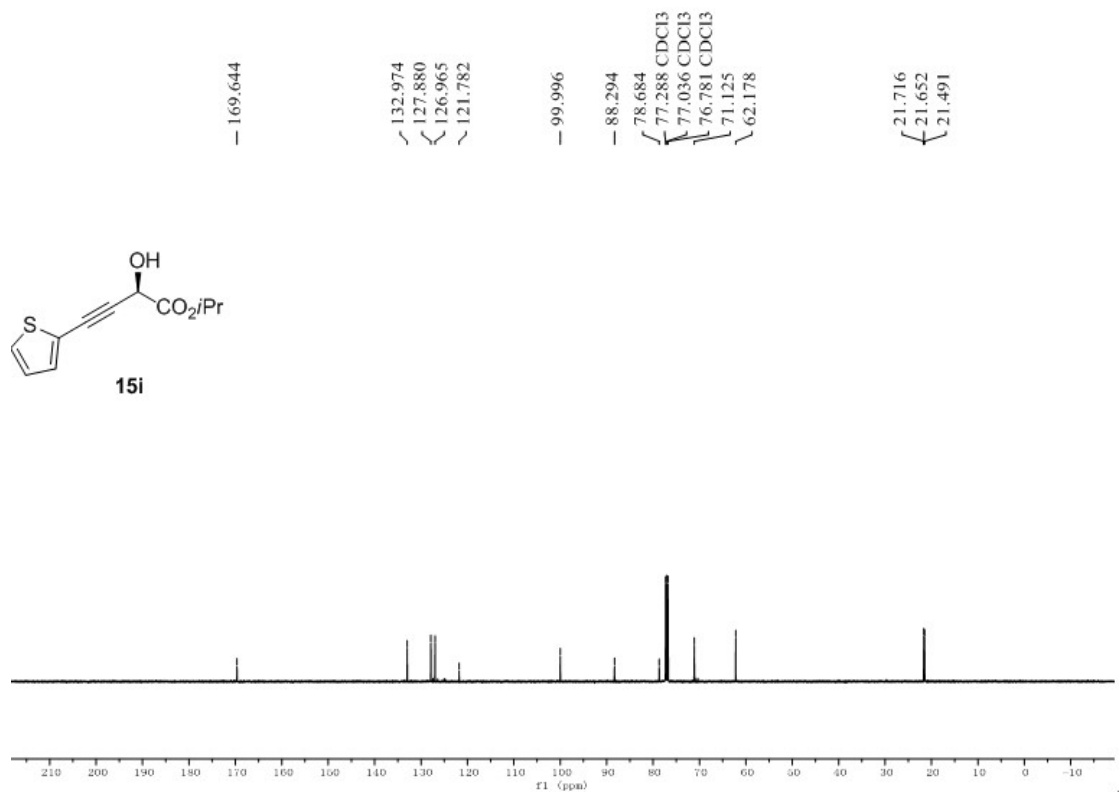

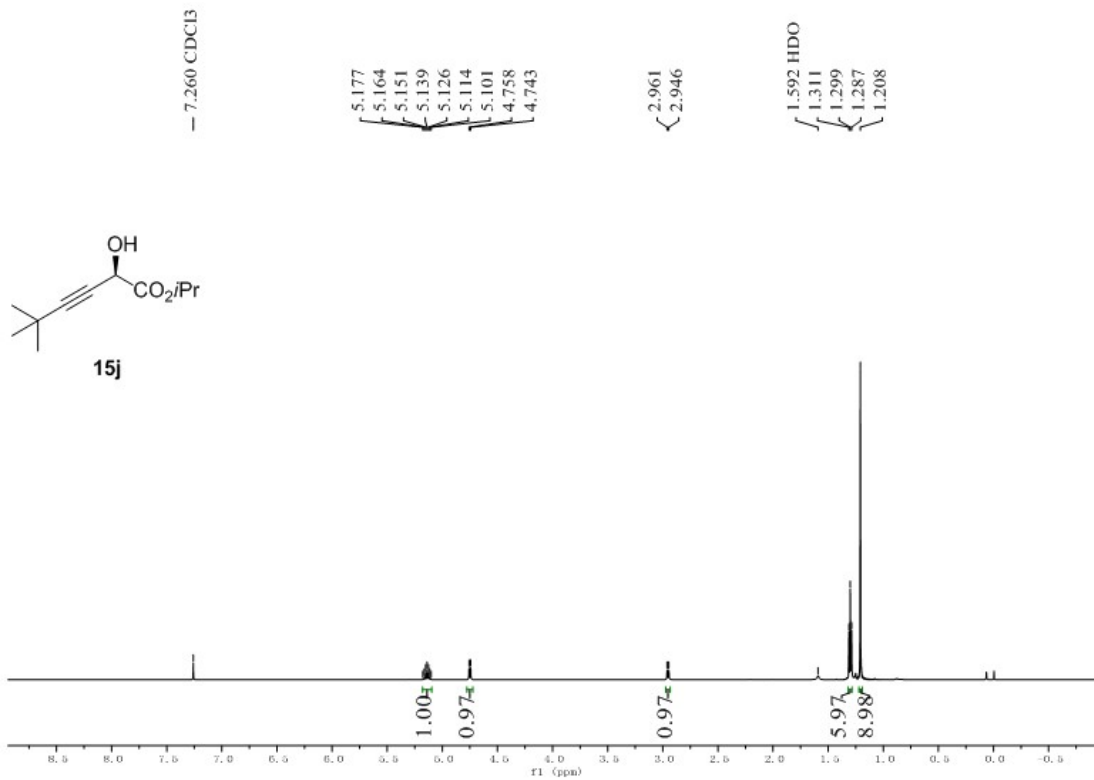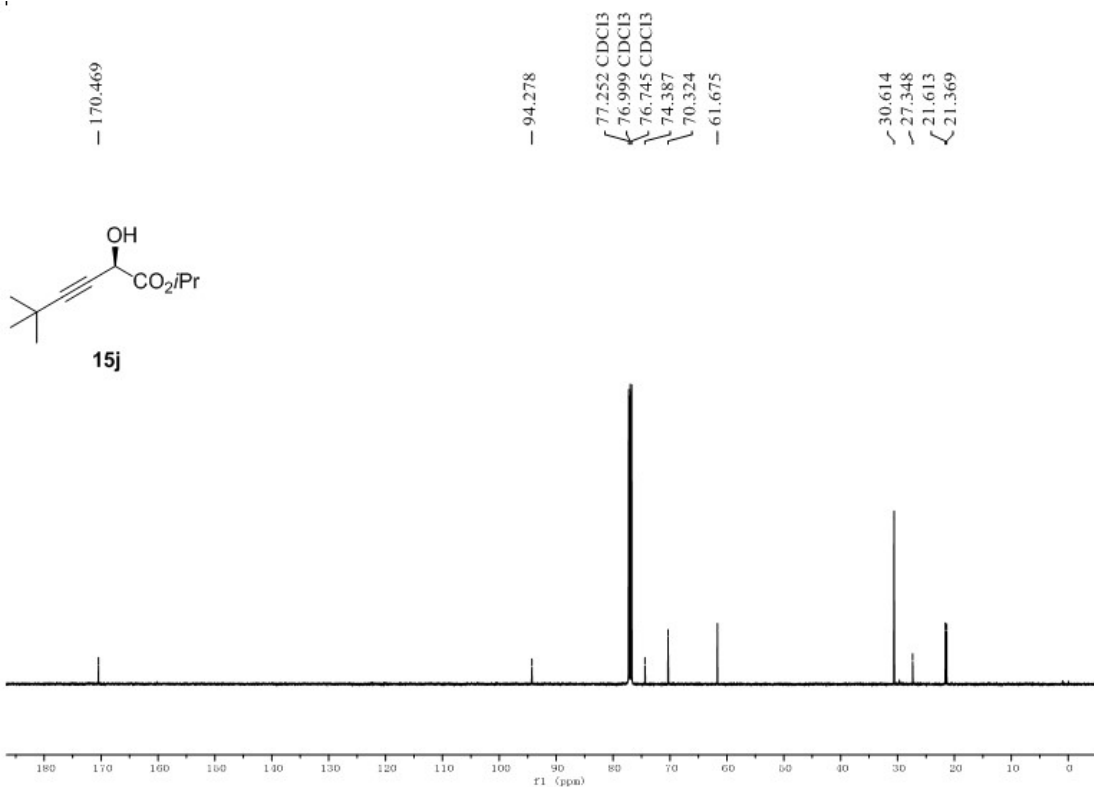

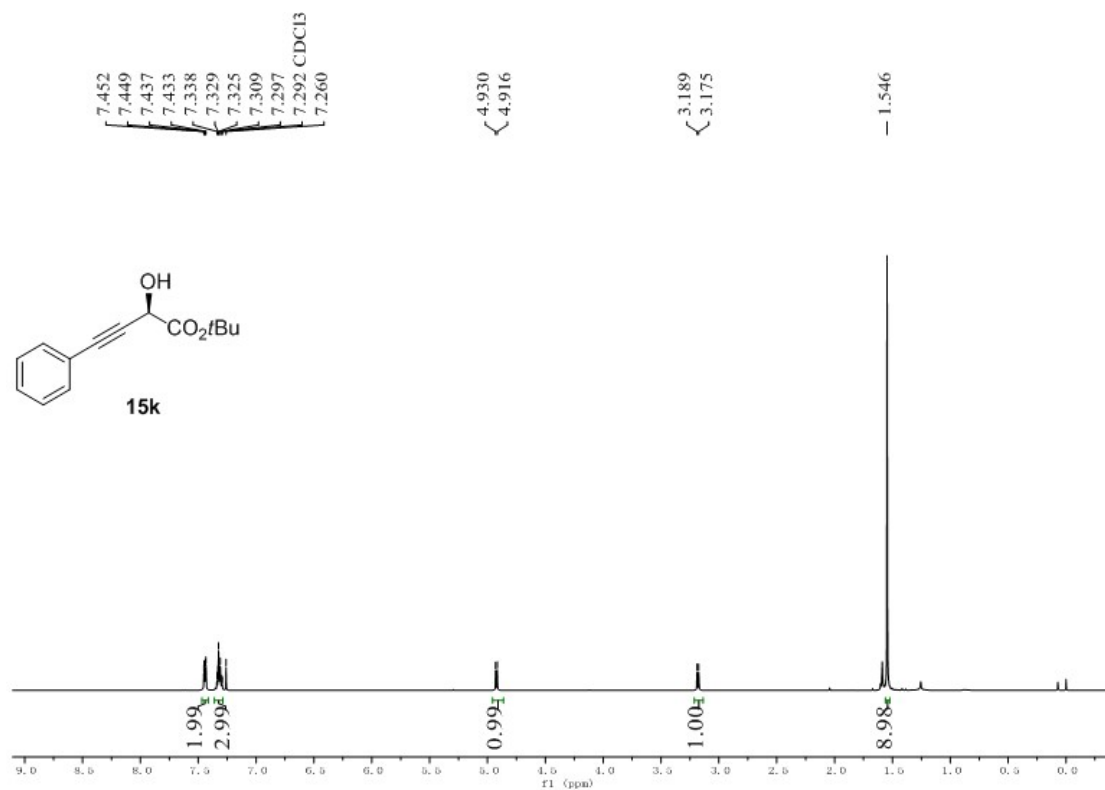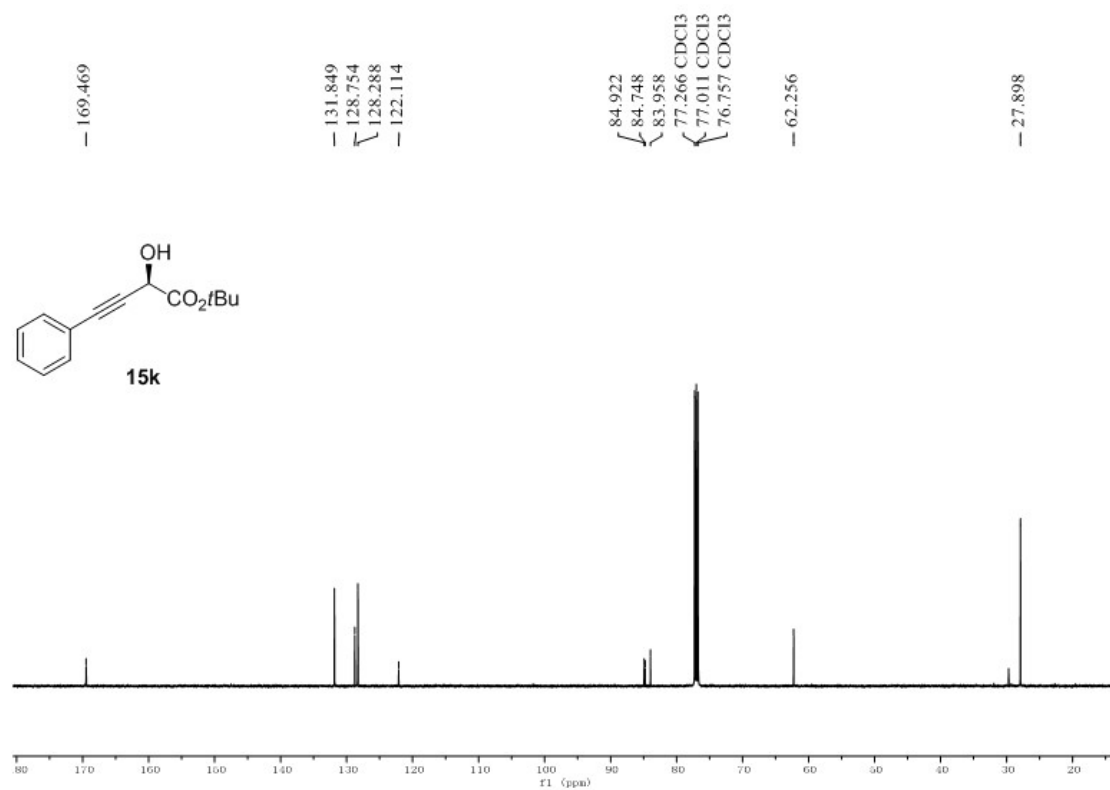

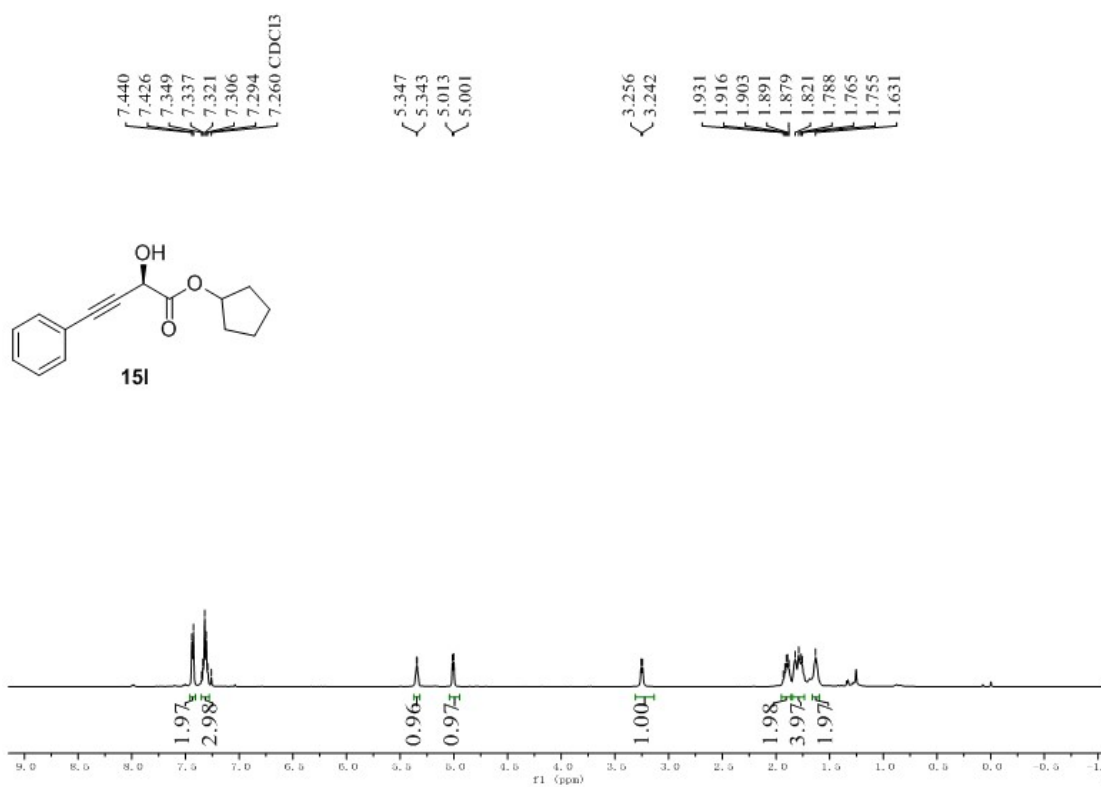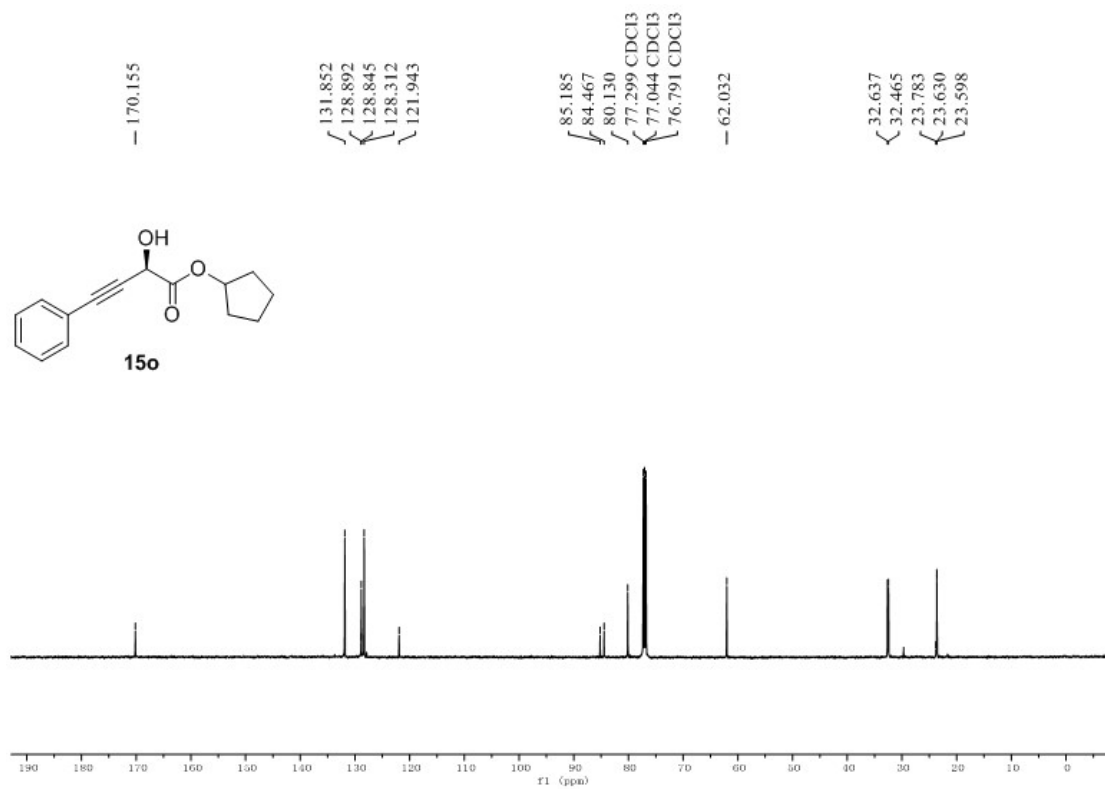



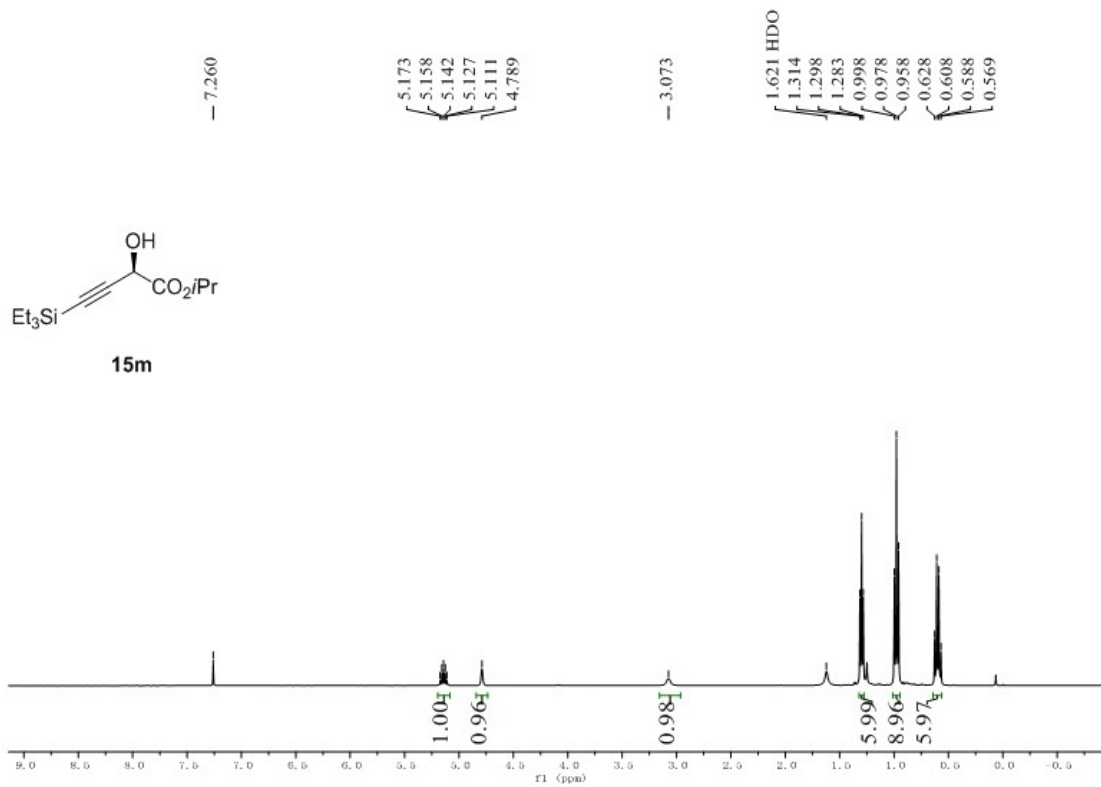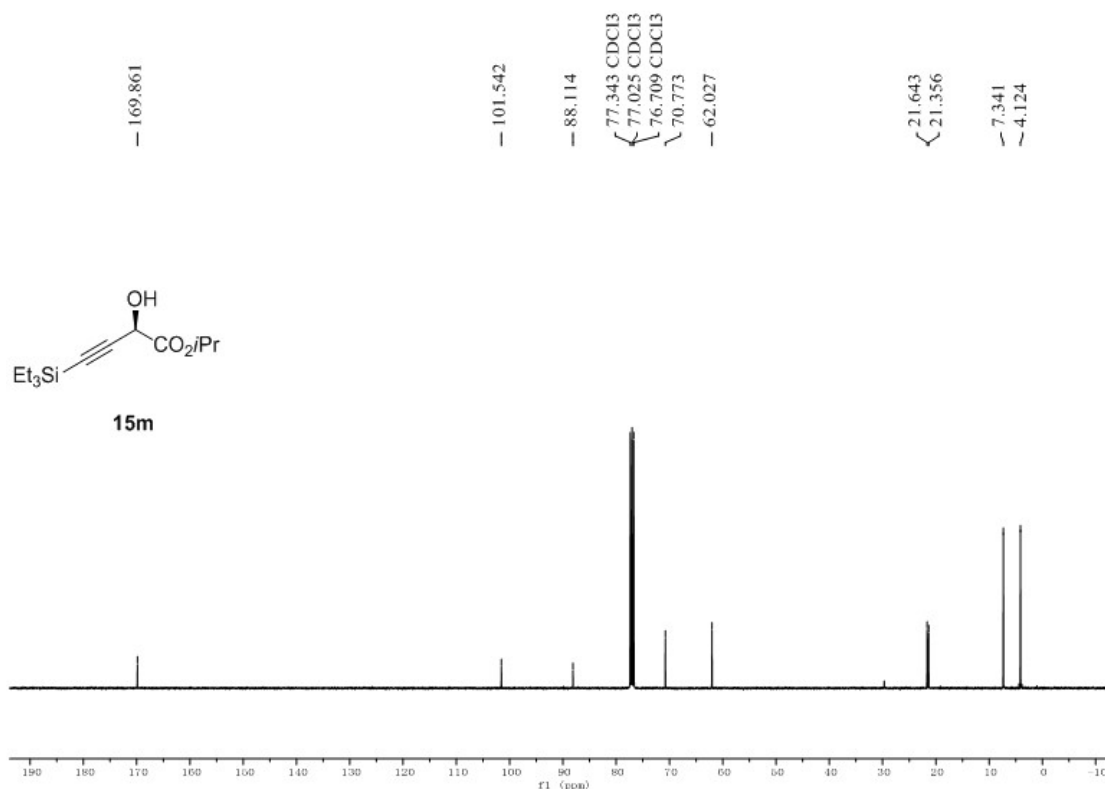

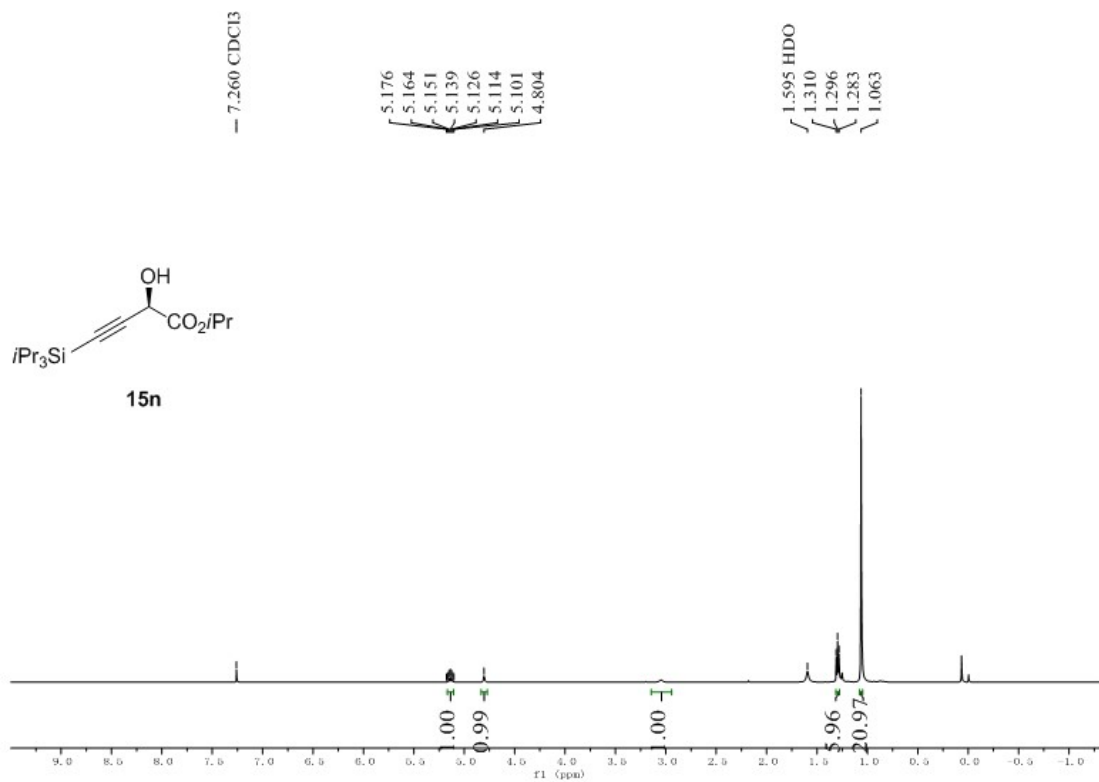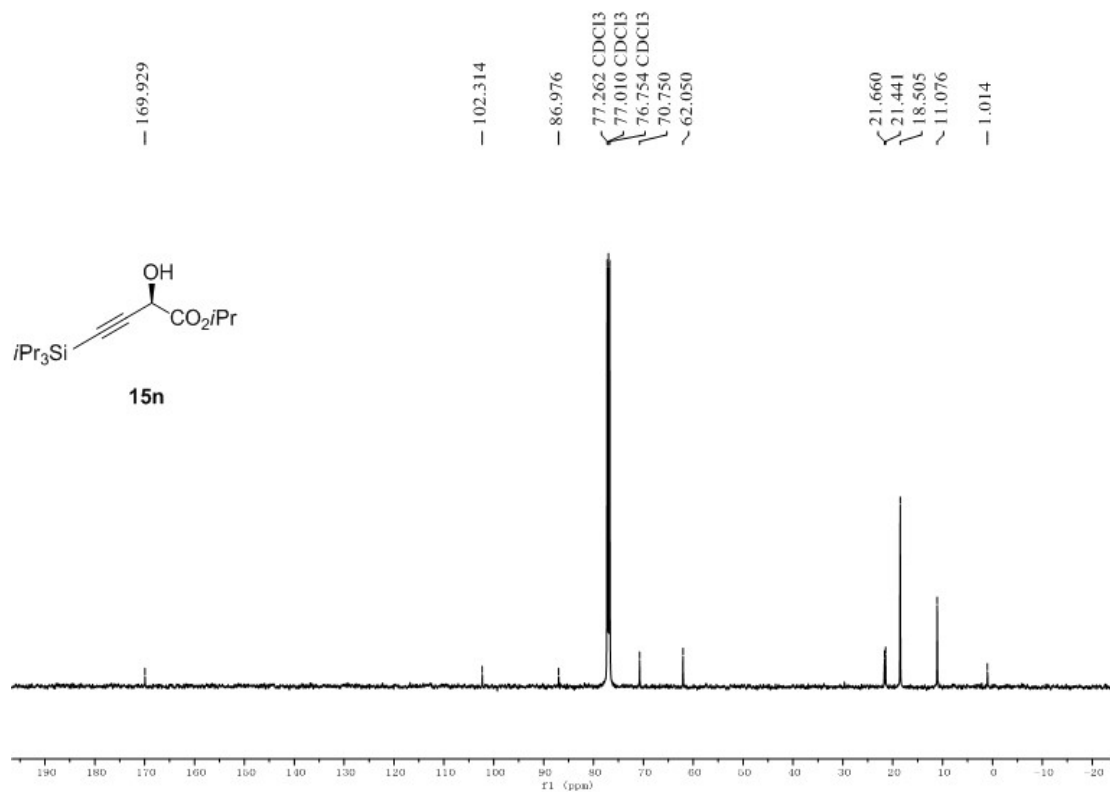

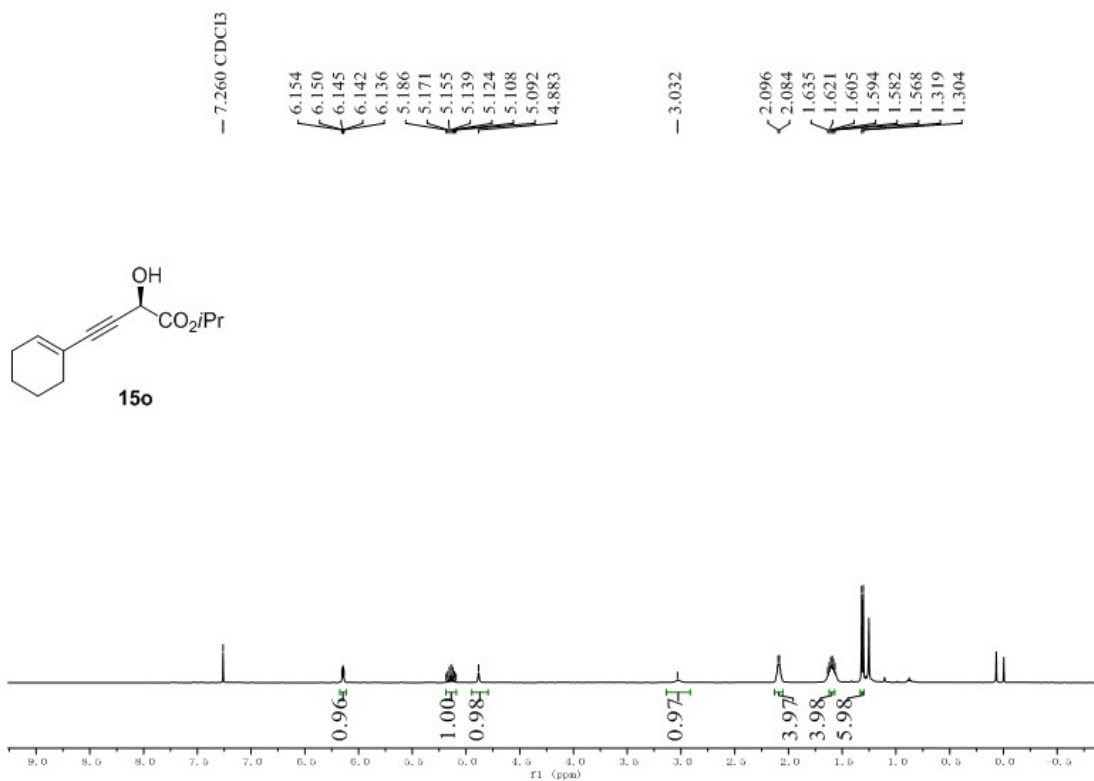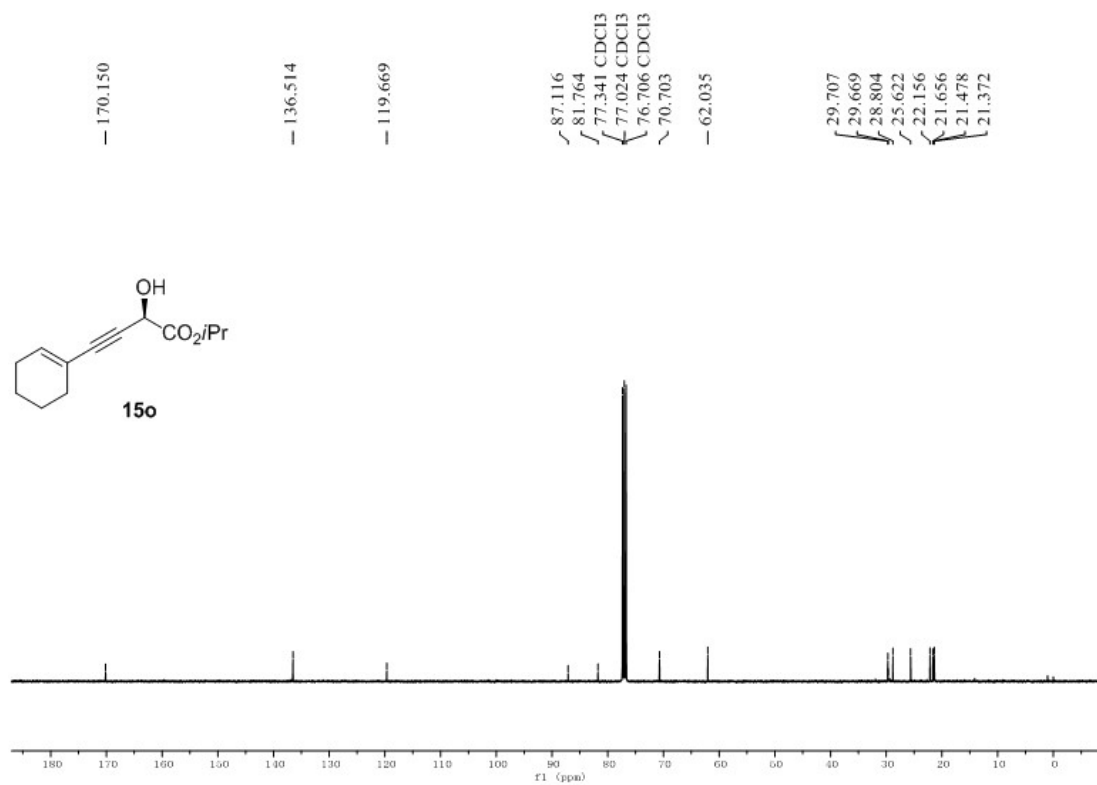

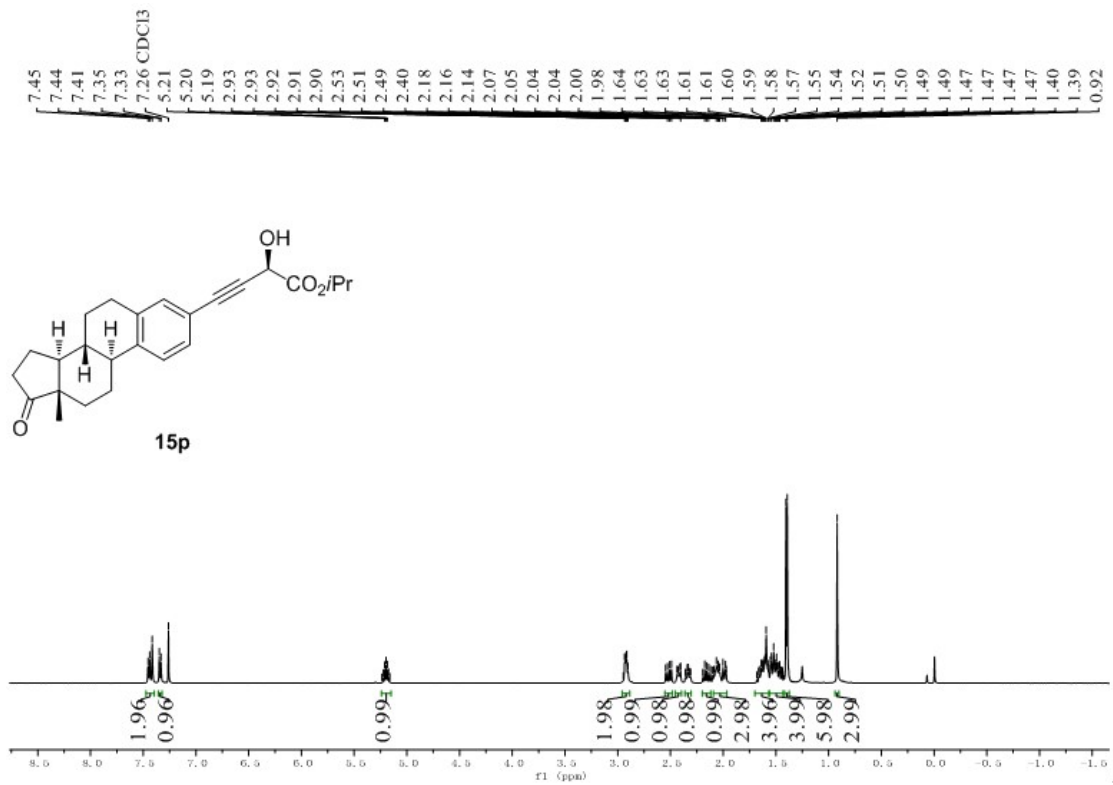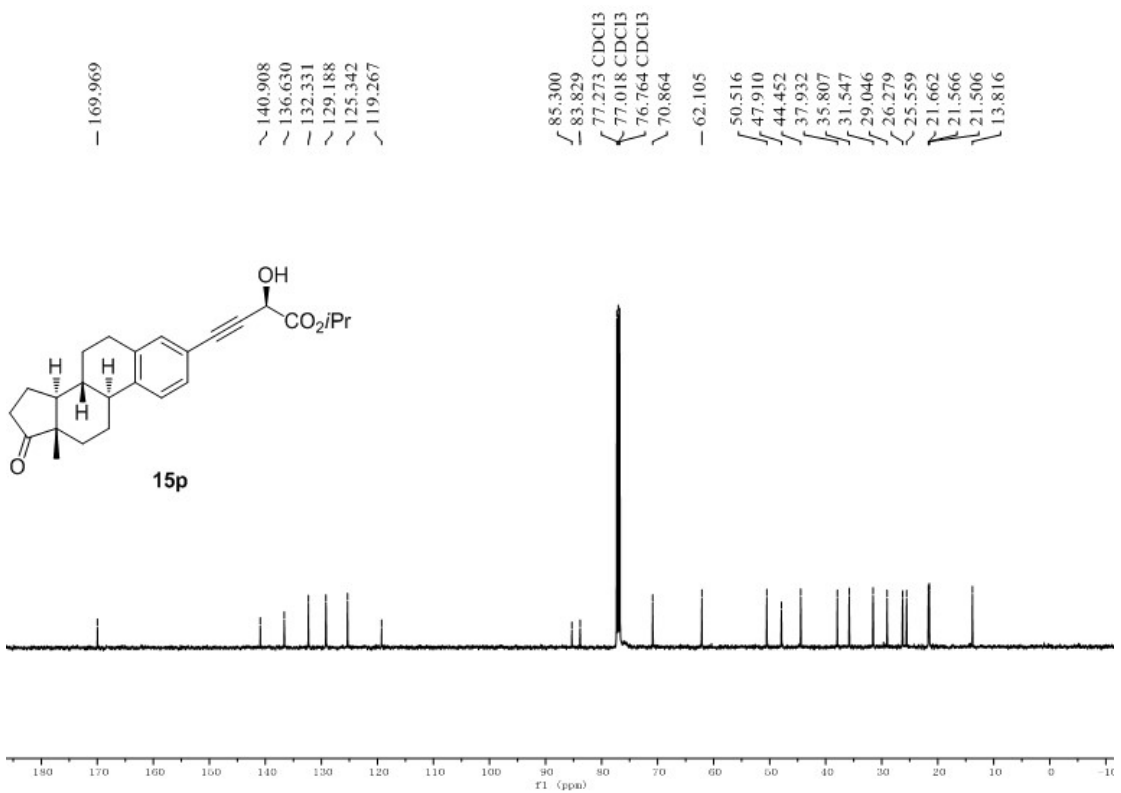

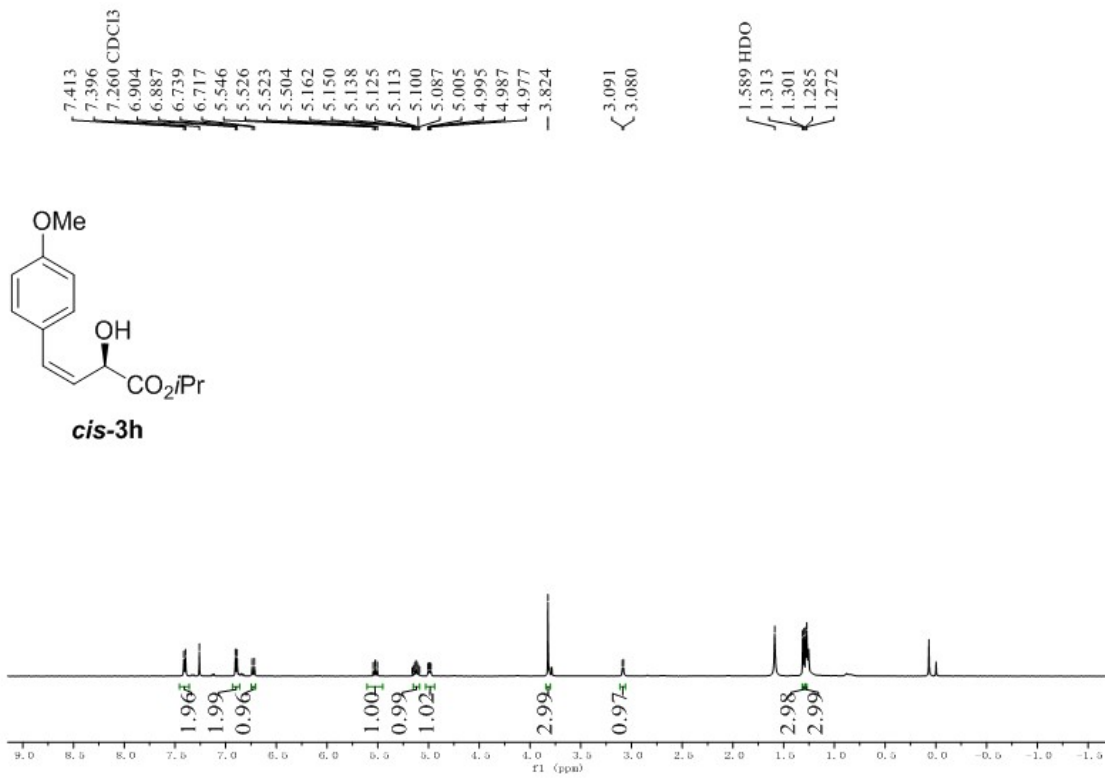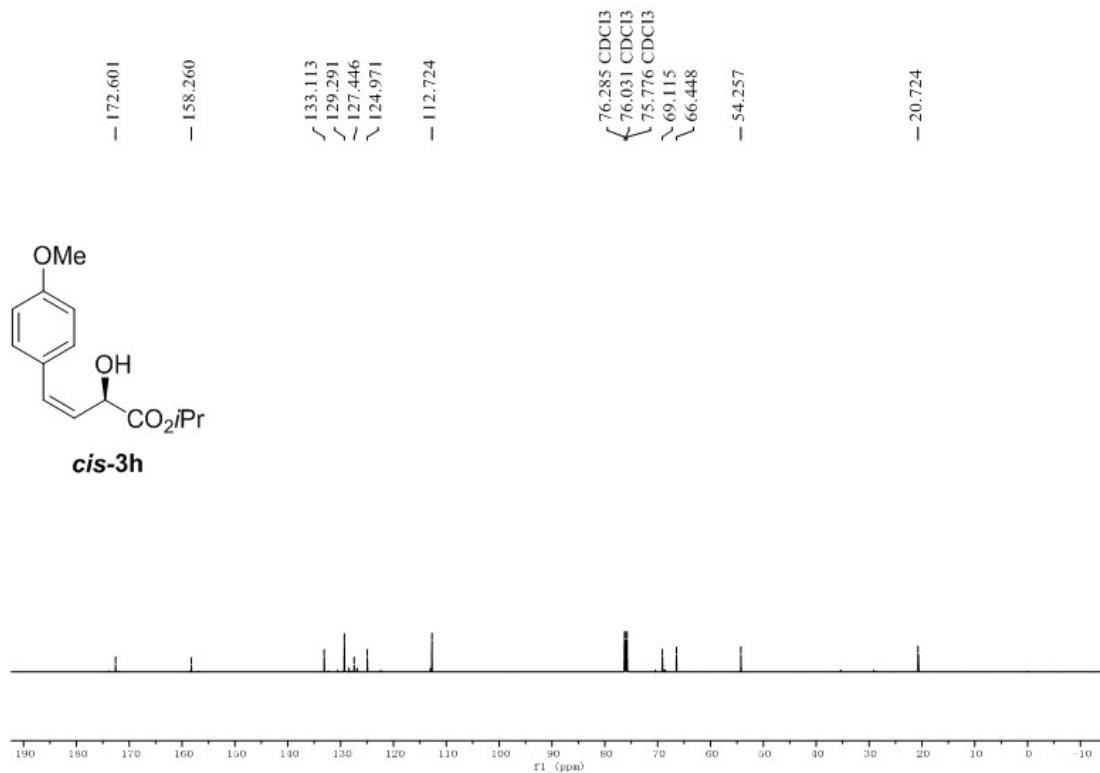

## IX. HPLC Data

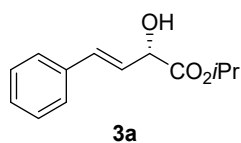

*Chiral HPLC spectrum of racemic 3a*

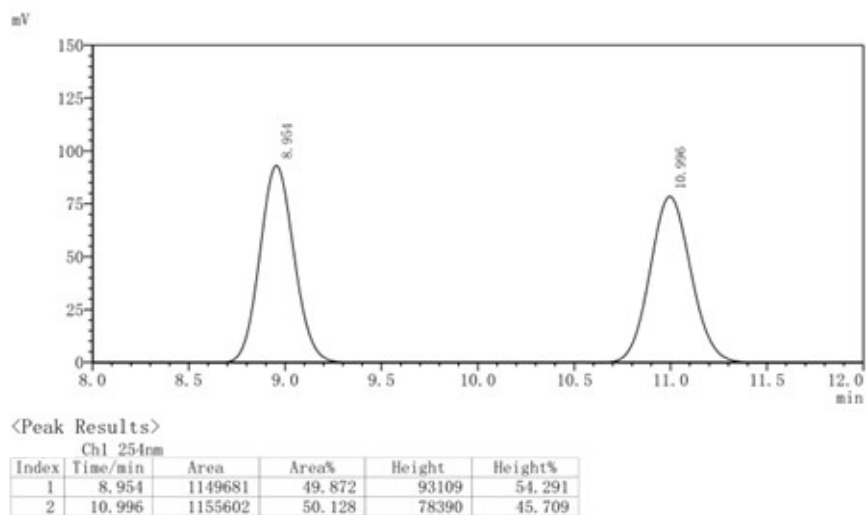

*Chiral HPLC spectrum of (S)-3a*

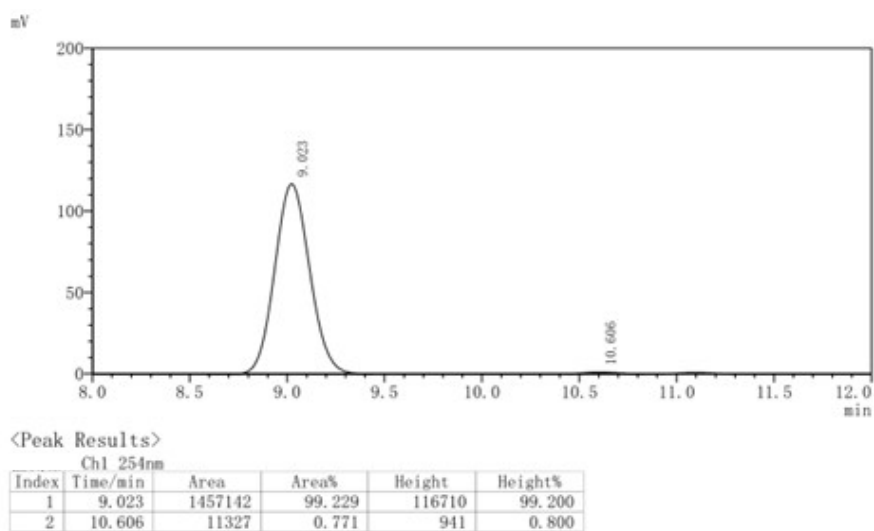

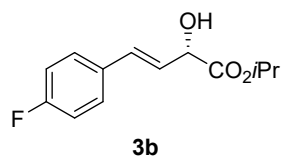

*Chiral HPLC spectrum of racemic 3b*

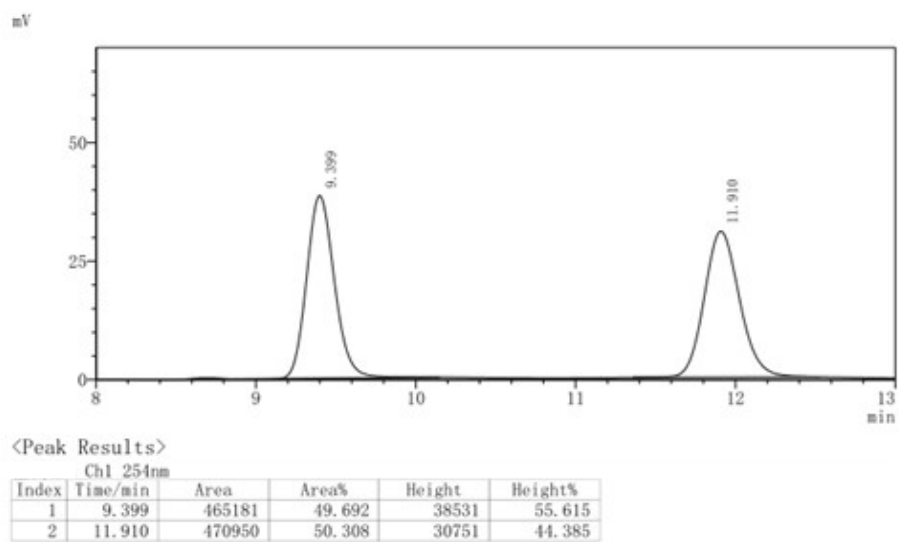

*Chiral HPLC spectrum of chiral (S)-3b*

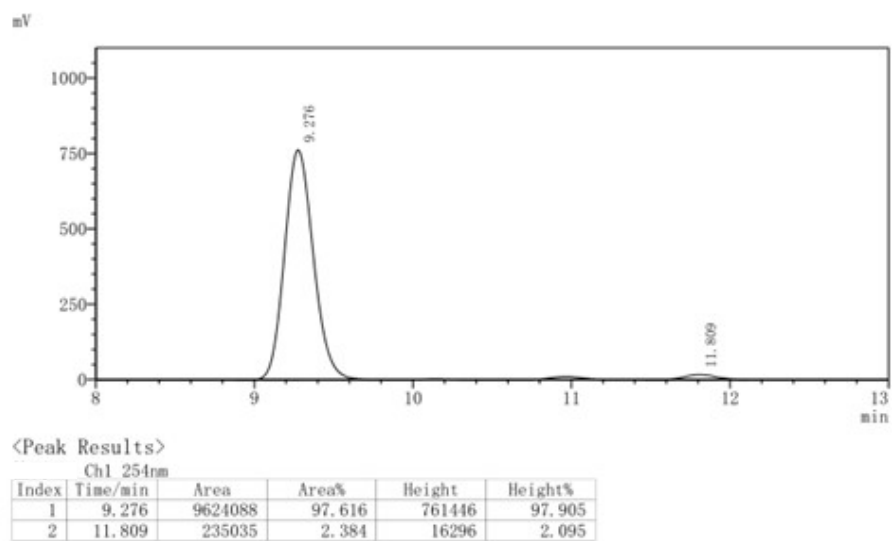

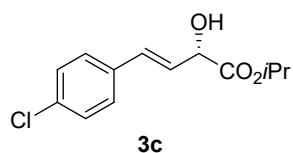

*Chiral HPLC spectrum of racemic 3c*

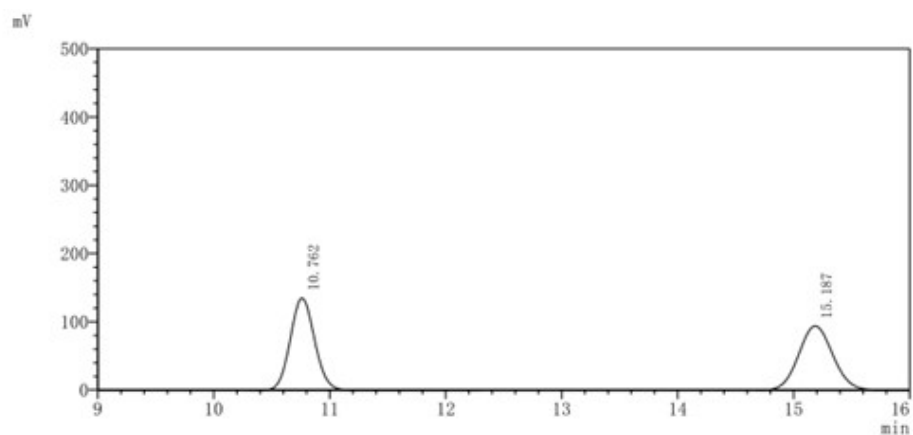

<Peak Results>

| Ch1 254nm |          |         |        |        |         |
|-----------|----------|---------|--------|--------|---------|
| Index     | Time/min | Area    | Area%  | Height | Height% |
| 1         | 10.762   | 1979703 | 50.472 | 134867 | 58.892  |
| 2         | 15.187   | 1942652 | 49.528 | 94142  | 41.108  |

*Chiral HPLC spectrum of chiral (S)-3c*

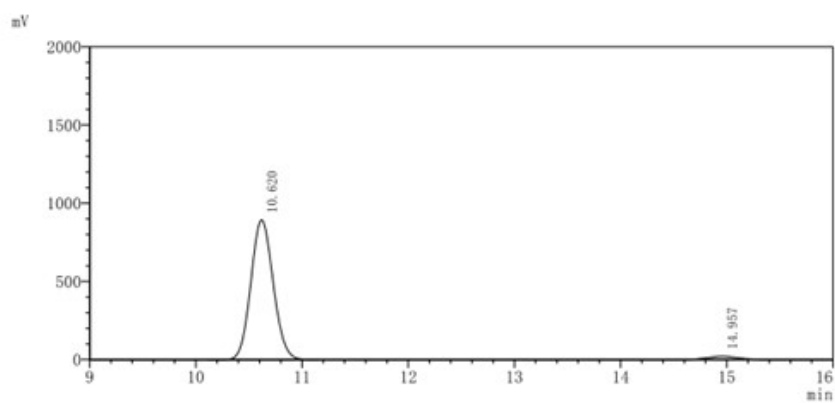

<Peak Results>

| Ch1 254nm |          |          |        |        |         |
|-----------|----------|----------|--------|--------|---------|
| Index     | Time/min | Area     | Area%  | Height | Height% |
| 1         | 10.620   | 13084016 | 97.732 | 892906 | 98.020  |
| 2         | 14.957   | 303603   | 2.268  | 18039  | 1.980   |



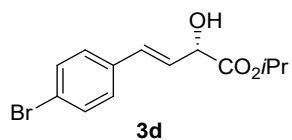

*Chiral HPLC spectrum of racemic 3d*

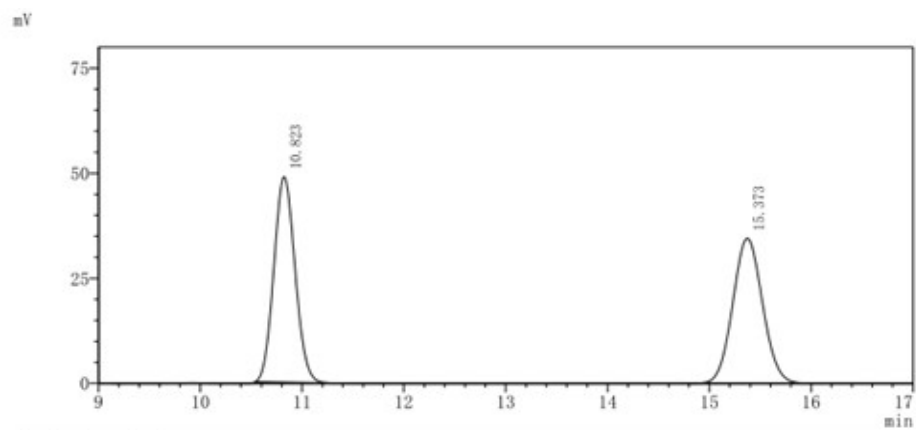

<Peak Results>

| Ch1 254nm |          |        |        |        |         |
|-----------|----------|--------|--------|--------|---------|
| Index     | Time/min | Area   | Area%  | Height | Height% |
| 1         | 10.823   | 707918 | 50.230 | 48850  | 58.623  |
| 2         | 15.373   | 701446 | 49.770 | 34479  | 41.377  |

*Chiral HPLC spectrum of chiral (S)-3d*

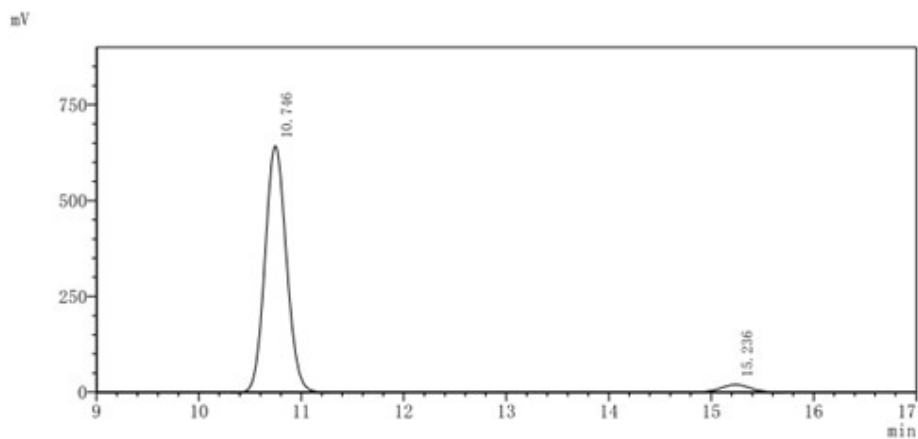

<Peak Results>

| Ch1 254nm |          |         |        |        |         |
|-----------|----------|---------|--------|--------|---------|
| Index     | Time/min | Area    | Area%  | Height | Height% |
| 1         | 10.746   | 9322537 | 96.136 | 641806 | 97.121  |
| 2         | 15.236   | 374720  | 3.864  | 19027  | 2.879   |

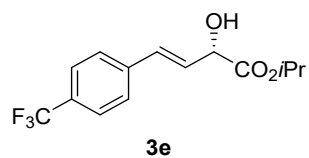

Chiral HPLC spectrum of racemic **3e**

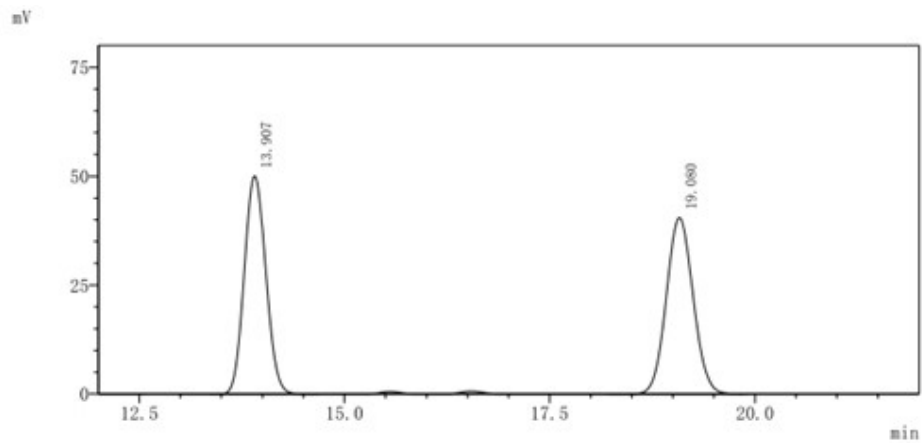

<Peak Results>  
Chl 254nm

| Index | Time/min | Area   | Area%  | Height | Height% |
|-------|----------|--------|--------|--------|---------|
| 1     | 13.907   | 910622 | 49.744 | 50062  | 55.307  |
| 2     | 19.080   | 920000 | 50.256 | 40455  | 44.693  |

Chiral HPLC spectrum of chiral (*S*)-**3e**

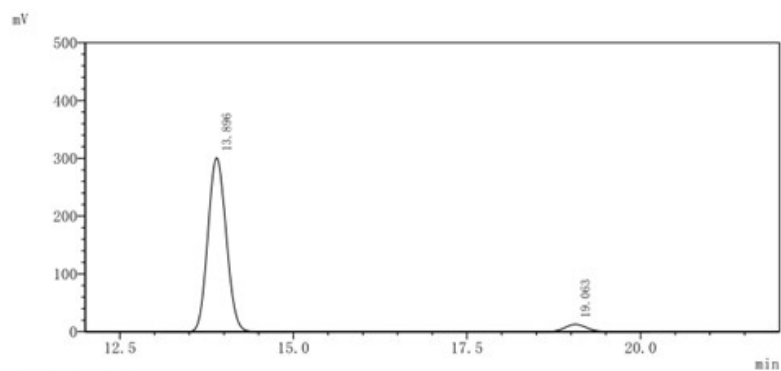

<Peak Results>  
Chl 254nm

| Index | Time/min | Area    | Area%  | Height | Height% |
|-------|----------|---------|--------|--------|---------|
| 1     | 13.896   | 5496963 | 95.017 | 300833 | 95.912  |
| 2     | 19.063   | 288257  | 4.983  | 12824  | 4.088   |

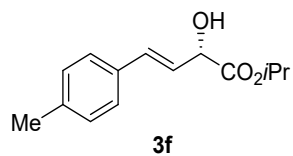

Chiral HPLC spectrum of racemic **3f**

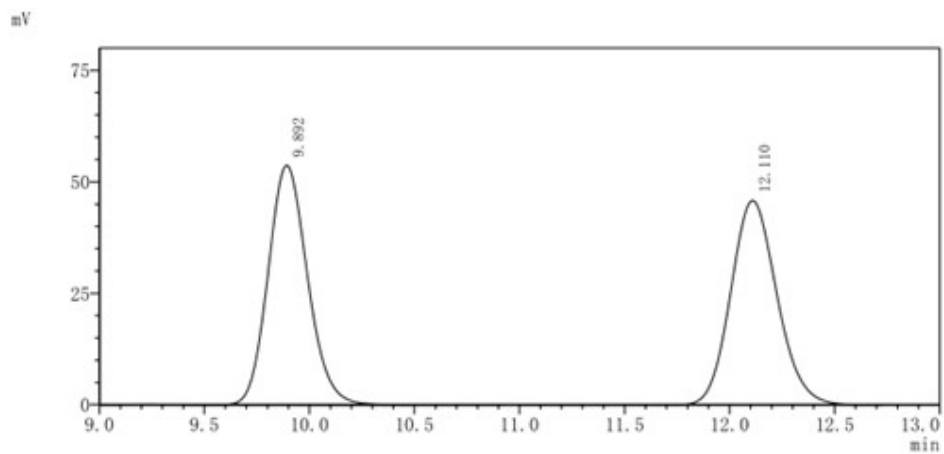

<Peak Results>

Ch1 254nm

| Index | Time/min | Area   | Area%  | Height | Height% |
|-------|----------|--------|--------|--------|---------|
| 1     | 9.892    | 698919 | 49.853 | 53672  | 53.916  |
| 2     | 12.110   | 703042 | 50.147 | 45875  | 46.084  |

Chiral HPLC spectrum of chiral (*S*)-**3f**

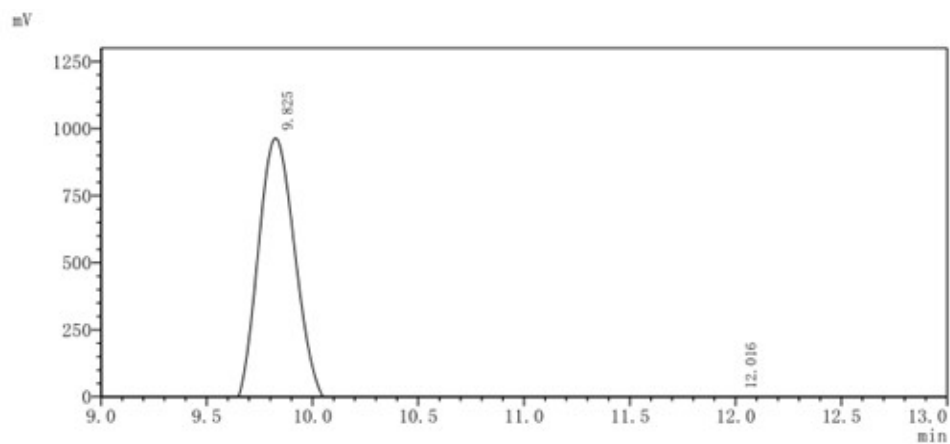

<Peak Results>

Ch1 254nm

| Index | Time/min | Area     | Area%  | Height  | Height% |
|-------|----------|----------|--------|---------|---------|
| 1     | 9.825    | 13565170 | 99.120 | 1045216 | 99.241  |
| 2     | 12.016   | 120431   | 0.880  | 7995    | 0.759   |

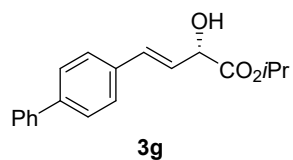

Chiral HPLC spectrum of racemic **3g**

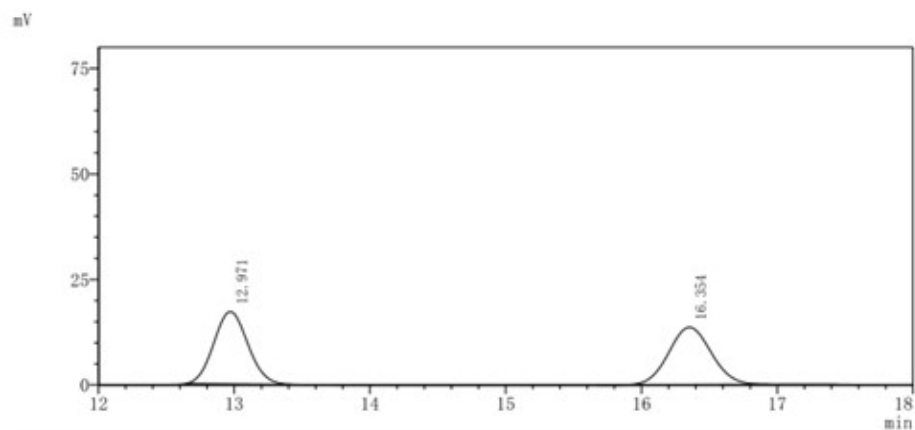

<Peak Results>

| Ch1 254nm |          |        |        |        |         |
|-----------|----------|--------|--------|--------|---------|
| Index     | Time/min | Area   | Area%  | Height | Height% |
| 1         | 12.971   | 300491 | 50.254 | 17150  | 55.808  |
| 2         | 16.354   | 297456 | 49.746 | 13580  | 44.192  |

Chiral HPLC spectrum of chiral (*S*)-**3g**

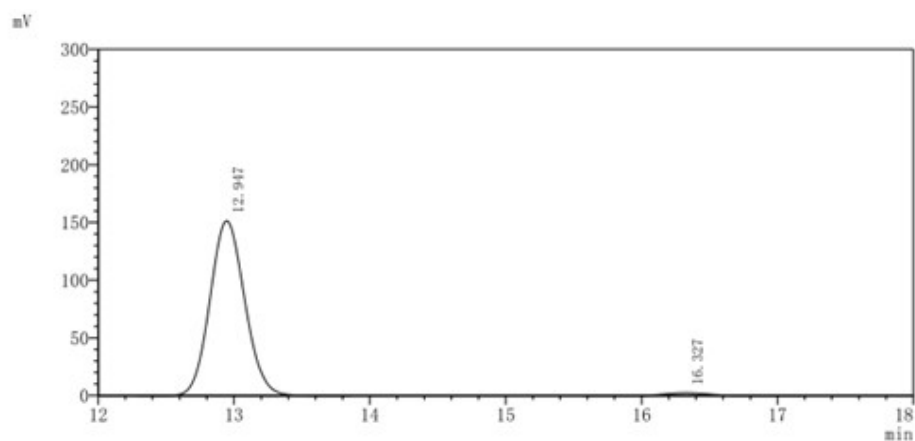

<Peak Results>

| Ch1 254nm |          |         |        |        |         |
|-----------|----------|---------|--------|--------|---------|
| Index     | Time/min | Area    | Area%  | Height | Height% |
| 1         | 12.947   | 2695250 | 98.086 | 151367 | 98.433  |
| 2         | 16.327   | 52603   | 1.914  | 2410   | 1.567   |

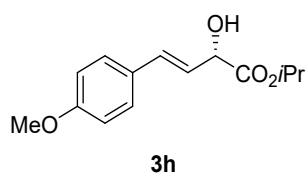

Chiral HPLC spectrum of racemic **3h**

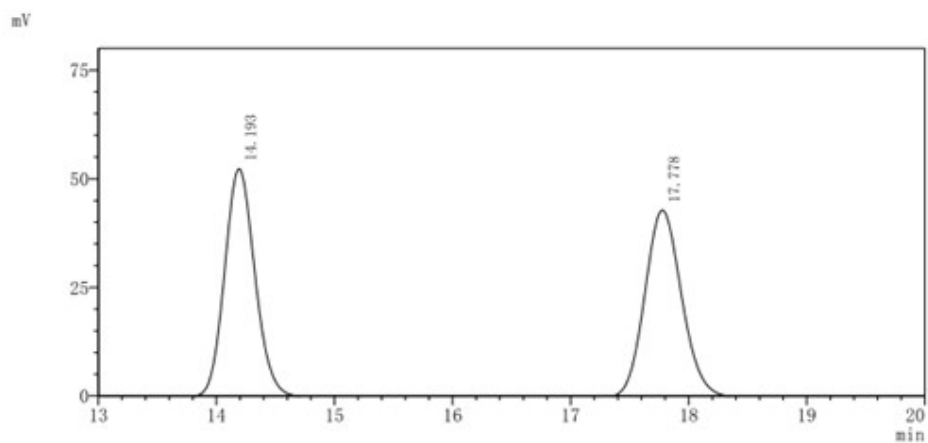

<Peak Results>

| Ch1 254nm |          |        |        |        |         |
|-----------|----------|--------|--------|--------|---------|
| Index     | Time/min | Area   | Area%  | Height | Height% |
| 1         | 14.193   | 938481 | 50.135 | 52492  | 54.955  |
| 2         | 17.778   | 933438 | 49.865 | 43025  | 45.045  |

Chiral HPLC spectrum of chiral (*S*)-**3h**

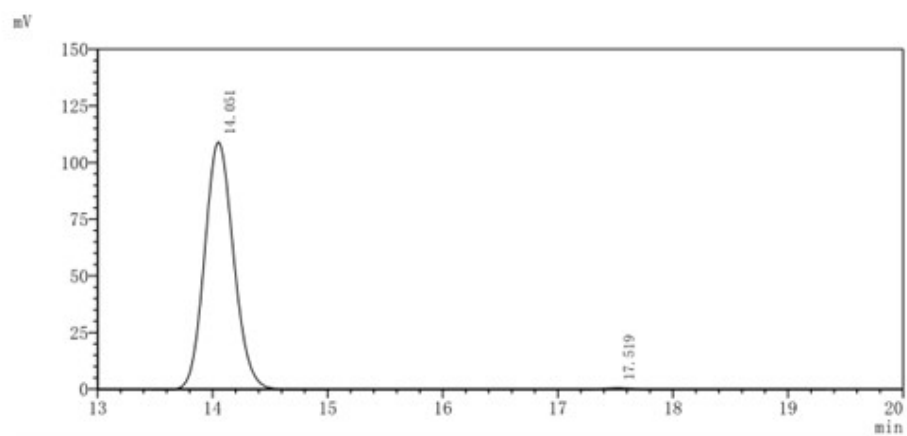

<Peak Results>

| Ch1 254nm |          |         |        |        |         |
|-----------|----------|---------|--------|--------|---------|
| Index     | Time/min | Area    | Area%  | Height | Height% |
| 1         | 14.051   | 1907943 | 99.452 | 109022 | 99.524  |
| 2         | 17.519   | 10516   | 0.548  | 522    | 0.476   |

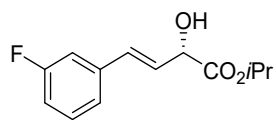

**3i**

*Chiral HPLC spectrum of racemic 3i*

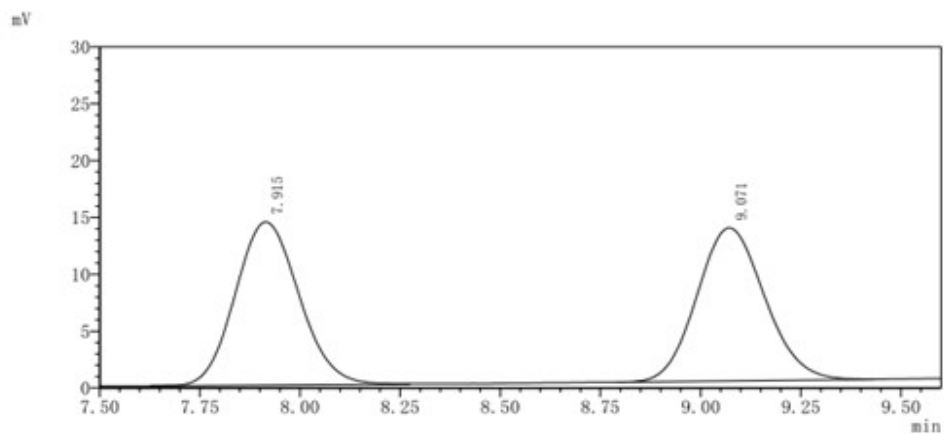

<Peak Results>

| Chl 254nm |          |        |        |        |         |
|-----------|----------|--------|--------|--------|---------|
| Index     | Time/min | Area   | Area%  | Height | Height% |
| 1         | 7.915    | 159387 | 50.044 | 14350  | 51.603  |
| 2         | 9.071    | 159107 | 49.956 | 13459  | 48.397  |

*Chiral HPLC spectrum of chiral (S)-3i*

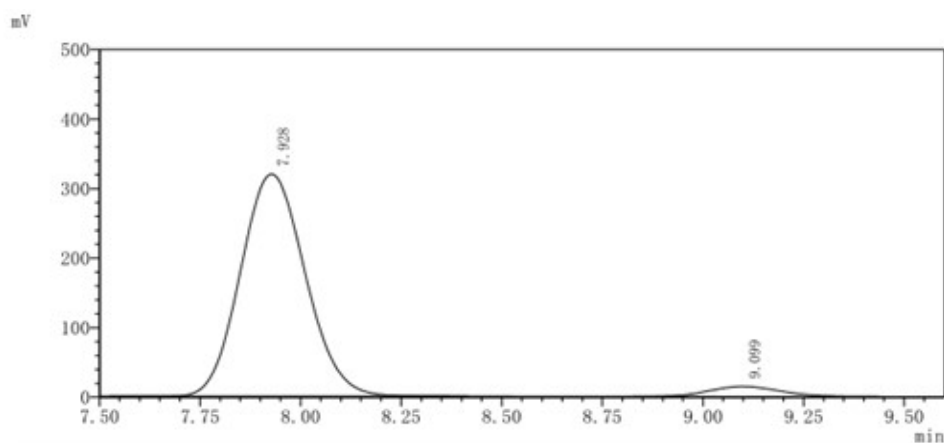

<Peak Results>

| Chl 254nm |          |         |        |        |         |
|-----------|----------|---------|--------|--------|---------|
| Index     | Time/min | Area    | Area%  | Height | Height% |
| 1         | 7.928    | 3588009 | 95.227 | 319724 | 95.666  |
| 2         | 9.099    | 179858  | 4.773  | 14485  | 4.334   |

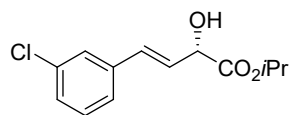

**3j**

*Chiral HPLC spectrum of racemic 3j*

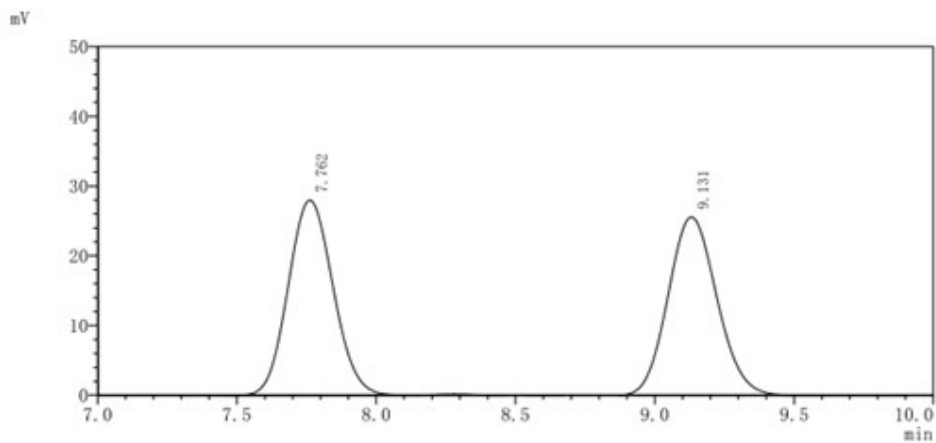

<Peak Results>

| Chl 254nm |          |        |        |        |         |
|-----------|----------|--------|--------|--------|---------|
| Index     | Time/min | Area   | Area%  | Height | Height% |
| 1         | 7.762    | 312928 | 49.984 | 27946  | 52.180  |
| 2         | 9.131    | 313122 | 50.016 | 25611  | 47.820  |

*Chiral HPLC spectrum of chiral (S)-3j*

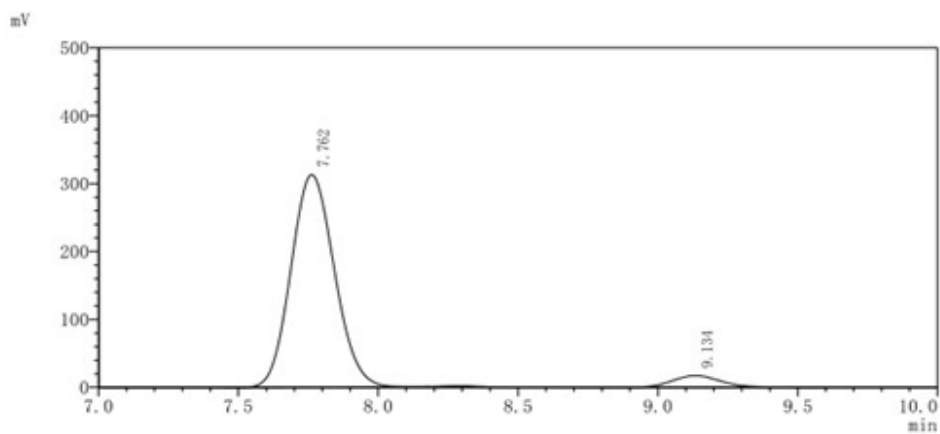

<Peak Results>

| Chl 254nm |          |         |        |        |         |
|-----------|----------|---------|--------|--------|---------|
| Index     | Time/min | Area    | Area%  | Height | Height% |
| 1         | 7.762    | 3380033 | 94.420 | 312579 | 94.849  |
| 2         | 9.134    | 199755  | 5.580  | 16974  | 5.151   |

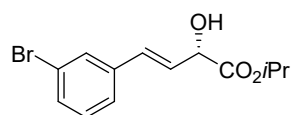

**3k**

*Chiral HPLC spectrum of racemic 3k*

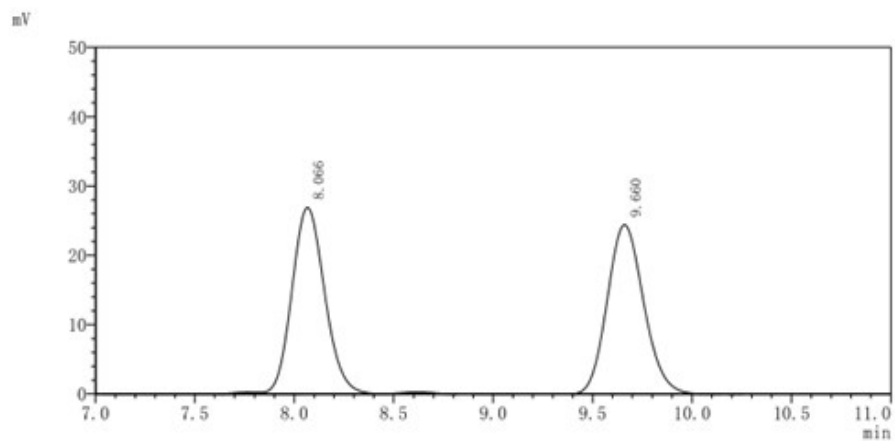

<Peak Results>

| Chl 254nm |          |        |        |        |         |
|-----------|----------|--------|--------|--------|---------|
| Index     | Time/min | Area   | Area%  | Height | Height% |
| 1         | 8.066    | 309966 | 49.789 | 26880  | 52.372  |
| 2         | 9.660    | 312595 | 50.211 | 24445  | 47.628  |

*Chiral HPLC spectrum of chiral (S)-3k*

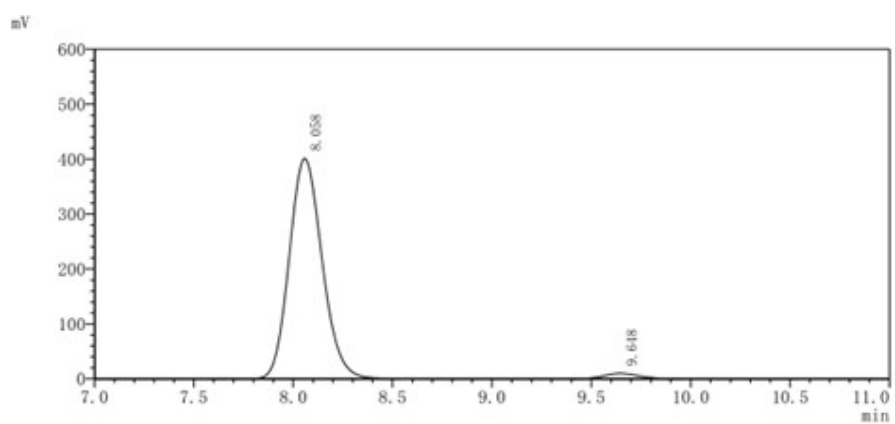

<Peak Results>

| Chl 254nm |          |         |        |        |         |
|-----------|----------|---------|--------|--------|---------|
| Index     | Time/min | Area    | Area%  | Height | Height% |
| 1         | 8.058    | 4617426 | 97.393 | 401298 | 97.607  |
| 2         | 9.648    | 123597  | 2.607  | 9837   | 2.393   |



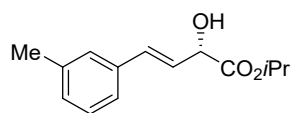

**3I**

*Chiral HPLC spectrum of racemic 3I*

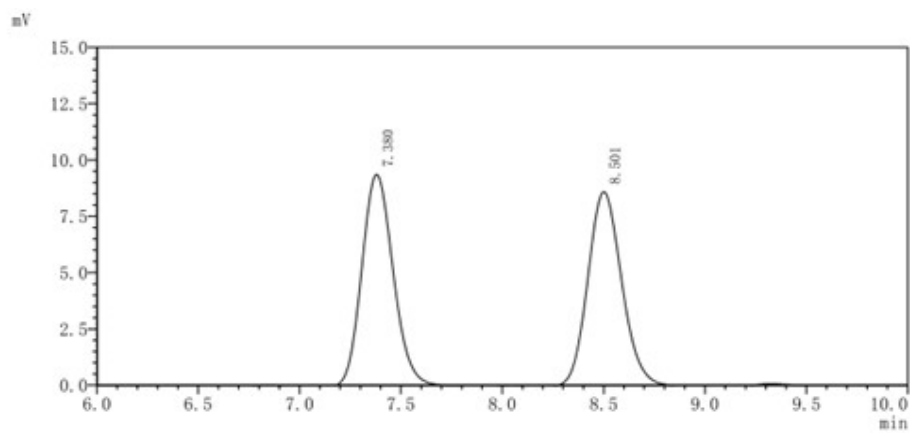

<Peak Results>

| Chl 254nm |          |        |        |        |         |
|-----------|----------|--------|--------|--------|---------|
| Index     | Time/min | Area   | Area%  | Height | Height% |
| 1         | 7.380    | 101102 | 50.193 | 9380   | 52.111  |
| 2         | 8.501    | 100327 | 49.807 | 8620   | 47.889  |

*Chiral HPLC spectrum of chiral (S)-3I*

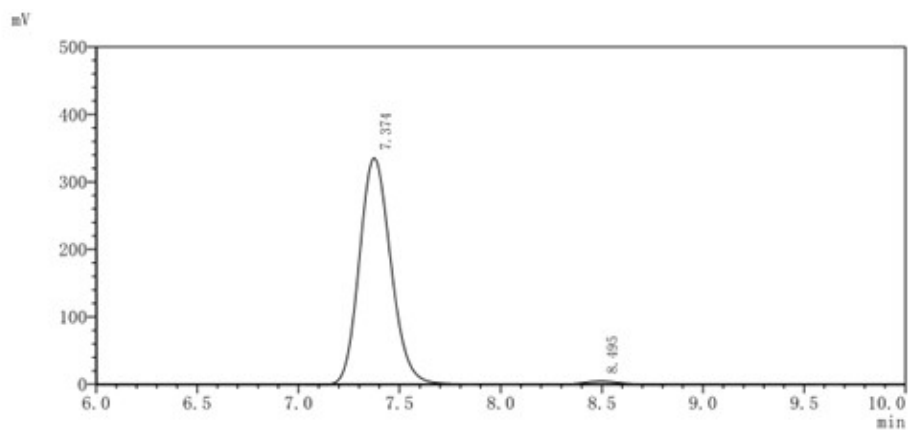

<Peak Results>

| Chl 254nm |          |         |        |        |         |
|-----------|----------|---------|--------|--------|---------|
| Index     | Time/min | Area    | Area%  | Height | Height% |
| 1         | 7.374    | 3618468 | 98.625 | 335505 | 98.671  |
| 2         | 8.495    | 50458   | 1.375  | 4520   | 1.329   |

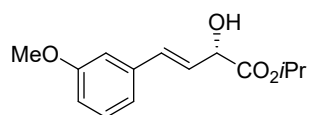

**3m**

*Chiral HPLC spectrum of racemic 3m*

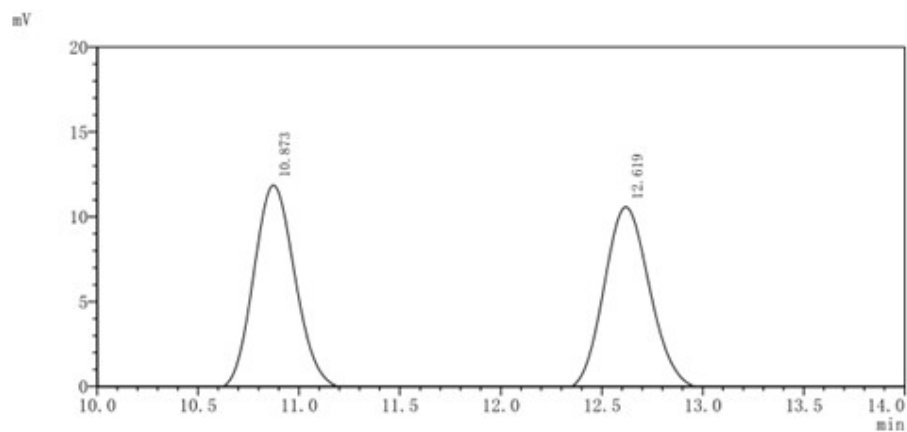

<Peak Results>

| Ch1 254nm |          |        |        |        |         |
|-----------|----------|--------|--------|--------|---------|
| Index     | Time/min | Area   | Area%  | Height | Height% |
| 1         | 10.873   | 175334 | 50.198 | 12097  | 52.777  |
| 2         | 12.619   | 173951 | 49.802 | 10824  | 47.223  |

*Chiral HPLC spectrum of chiral (S)-3m*

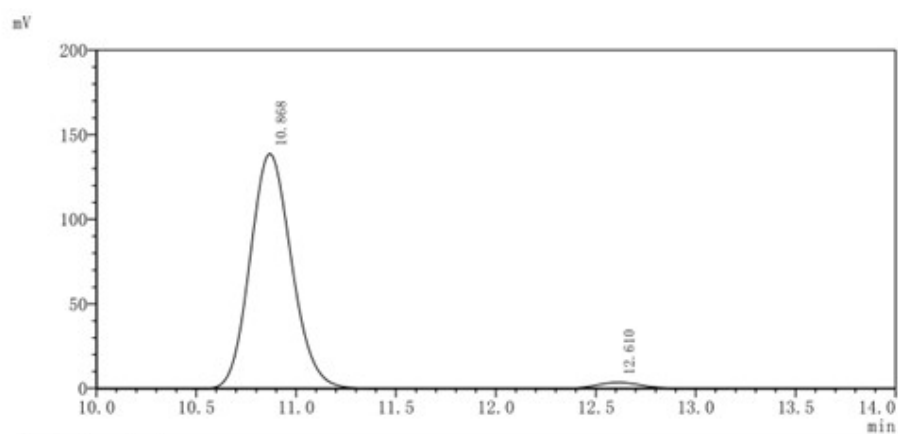

<Peak Results>

| Ch1 254nm |          |         |        |        |         |
|-----------|----------|---------|--------|--------|---------|
| Index     | Time/min | Area    | Area%  | Height | Height% |
| 1         | 10.868   | 2002339 | 97.150 | 138824 | 97.414  |
| 2         | 12.610   | 58748   | 2.850  | 3685   | 2.586   |

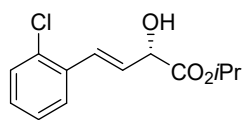

**3n**

*Chiral HPLC spectrum of racemic 3n*

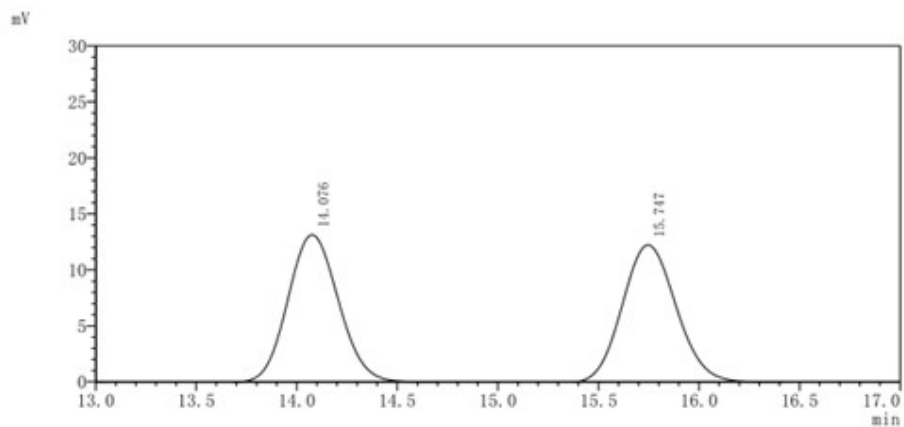

<Peak Results>

| Ch1 254nm |          |        |        |        |         |
|-----------|----------|--------|--------|--------|---------|
| Index     | Time/min | Area   | Area%  | Height | Height% |
| 1         | 14.076   | 235219 | 50.407 | 13206  | 51.789  |
| 2         | 15.747   | 231416 | 49.593 | 12293  | 48.211  |

*Chiral HPLC spectrum of chiral (S)-3n*

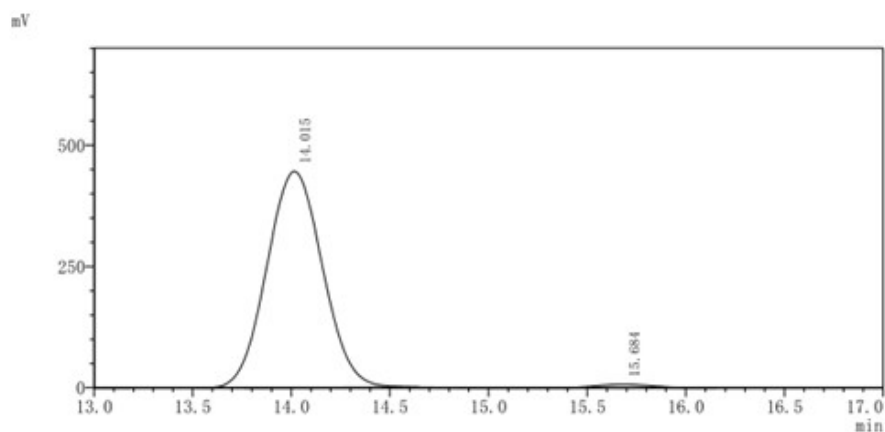

<Peak Results>

| Ch1 254nm |          |         |        |        |         |
|-----------|----------|---------|--------|--------|---------|
| Index     | Time/min | Area    | Area%  | Height | Height% |
| 1         | 14.015   | 8778561 | 98.337 | 445672 | 98.336  |
| 2         | 15.684   | 148485  | 1.663  | 7544   | 1.664   |

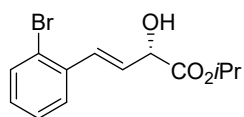

**3o**

*Chiral HPLC spectrum of racemic 3o*

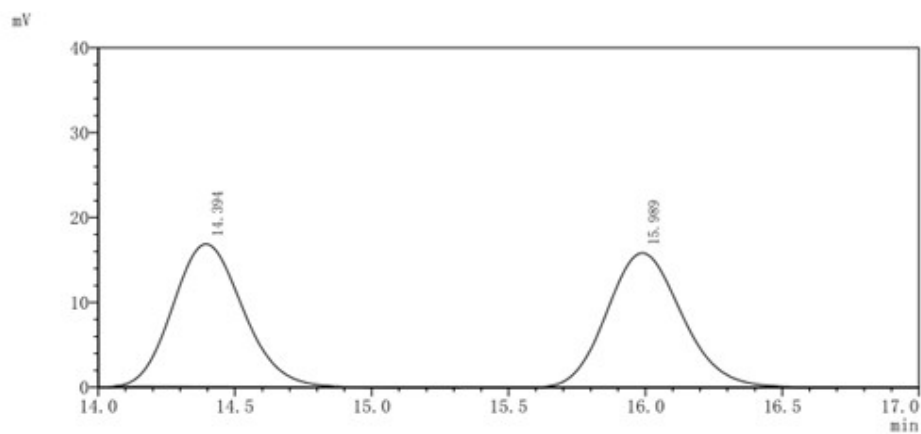

<Peak Results>

| Chl 254nm |          |        |        |        |         |
|-----------|----------|--------|--------|--------|---------|
| Index     | Time/min | Area   | Area%  | Height | Height% |
| 1         | 14.394   | 300689 | 49.641 | 16799  | 51.464  |
| 2         | 15.989   | 305034 | 50.359 | 15843  | 48.536  |

*Chiral HPLC spectrum of chiral (S)-3o*

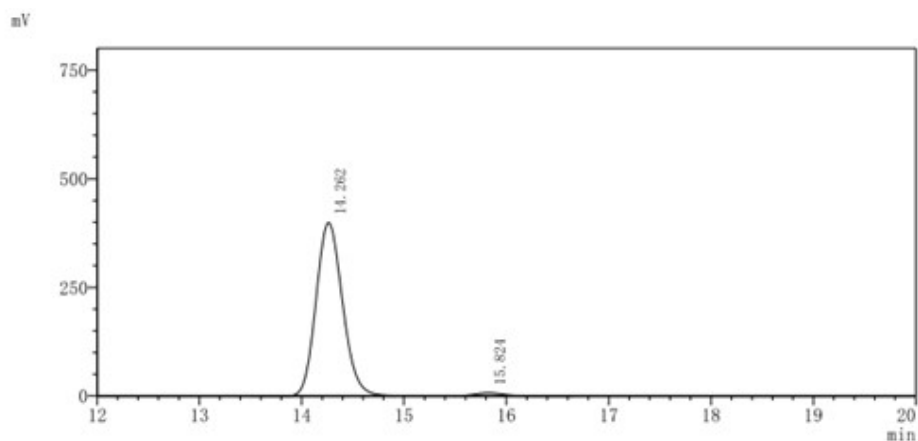

<Peak Results>

| Chl 254nm |          |         |        |        |         |
|-----------|----------|---------|--------|--------|---------|
| Index     | Time/min | Area    | Area%  | Height | Height% |
| 1         | 14.262   | 7152880 | 98.265 | 398367 | 98.302  |
| 2         | 15.821   | 126278  | 1.735  | 6882   | 1.698   |

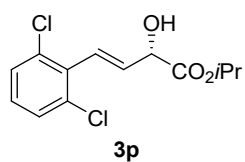

*Chiral HPLC spectrum of racemic 3p*

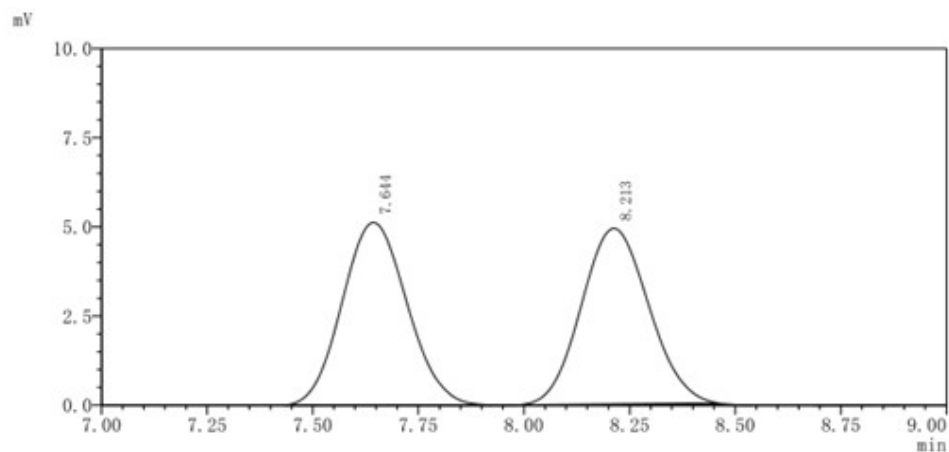

<Peak Results>

| Chl 254nm |          |       |        |        |         |
|-----------|----------|-------|--------|--------|---------|
| Index     | Time/min | Area  | Area%  | Height | Height% |
| 1         | 7.644    | 54897 | 50.123 | 5125   | 51.017  |
| 2         | 8.213    | 54628 | 49.877 | 4920   | 48.983  |

*Chiral HPLC spectrum of chiral (S)-3p*

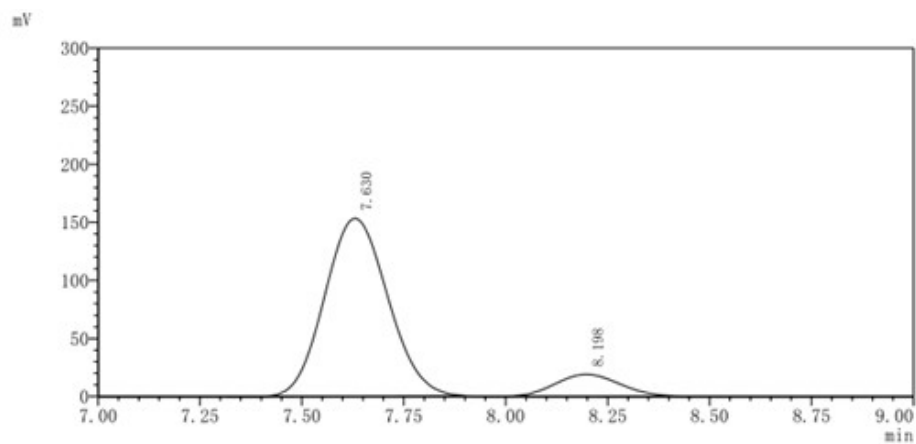

<Peak Results>

| Chl 254nm |          |         |        |        |         |
|-----------|----------|---------|--------|--------|---------|
| Index     | Time/min | Area    | Area%  | Height | Height% |
| 1         | 7.630    | 1652133 | 88.756 | 153016 | 88.987  |
| 2         | 8.198    | 209289  | 11.244 | 18938  | 11.013  |

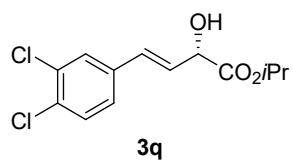

*Chiral HPLC spectrum of racemic 3q*

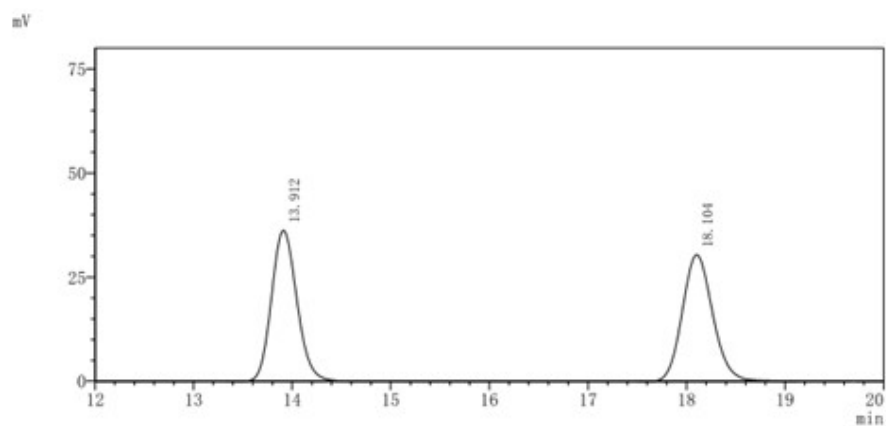

<Peak Results>

| Ch1 254nm |          |        |        |        |         |
|-----------|----------|--------|--------|--------|---------|
| Index     | Time/min | Area   | Area%  | Height | Height% |
| 1         | 13.912   | 644977 | 49.646 | 36183  | 54.351  |
| 2         | 18.104   | 654176 | 50.354 | 30390  | 45.649  |

*Chiral HPLC spectrum of chiral (S)-3q*

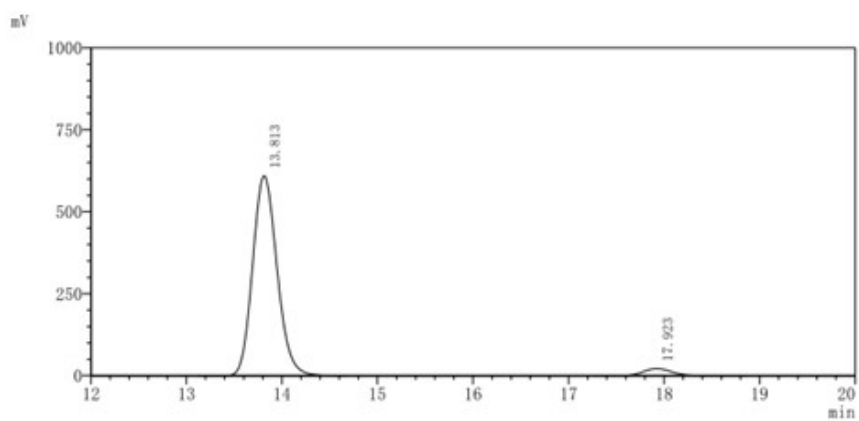

<Peak Results>

| Ch1 254nm |          |          |        |        |         |
|-----------|----------|----------|--------|--------|---------|
| Index     | Time/min | Area     | Area%  | Height | Height% |
| 1         | 13.813   | 10831604 | 95.902 | 609344 | 96.552  |
| 2         | 17.923   | 462902   | 4.098  | 21759  | 3.448   |



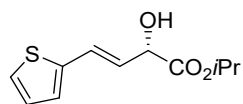

**3s**

*Chiral HPLC spectrum of racemic 3s*

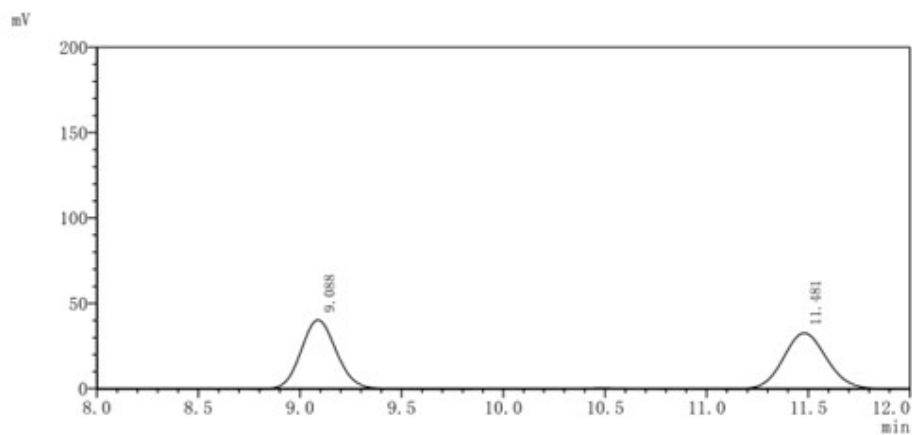

<Peak Results>

| Chl 254nm |          |        |        |        |         |
|-----------|----------|--------|--------|--------|---------|
| Index     | Time/min | Area   | Area%  | Height | Height% |
| 1         | 9.088    | 487785 | 50.380 | 40267  | 55.228  |
| 2         | 11.481   | 480428 | 49.620 | 32643  | 44.772  |

*Chiral HPLC spectrum of chiral (S)-3s*

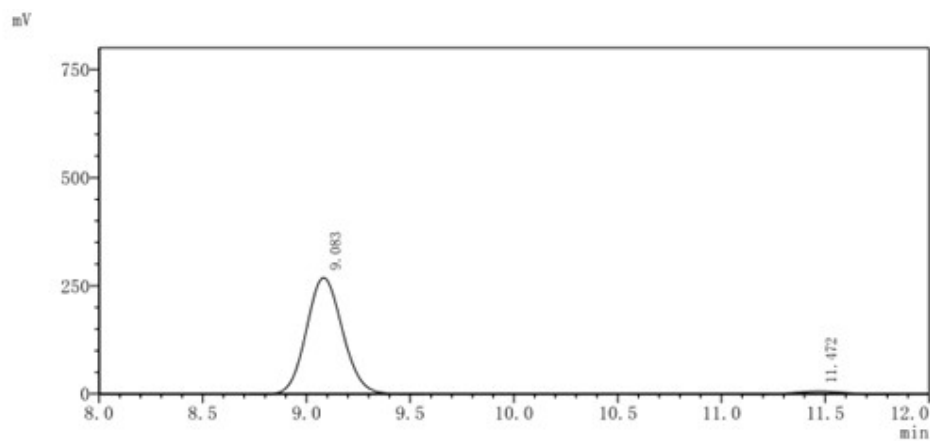

<Peak Results>

| Chl 254nm |          |         |        |        |         |
|-----------|----------|---------|--------|--------|---------|
| Index     | Time/min | Area    | Area%  | Height | Height% |
| 1         | 9.083    | 3243801 | 97.346 | 268946 | 97.845  |
| 2         | 11.472   | 88431   | 2.654  | 5924   | 2.155   |



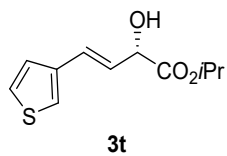

Chiral HPLC spectrum of racemic **3t**

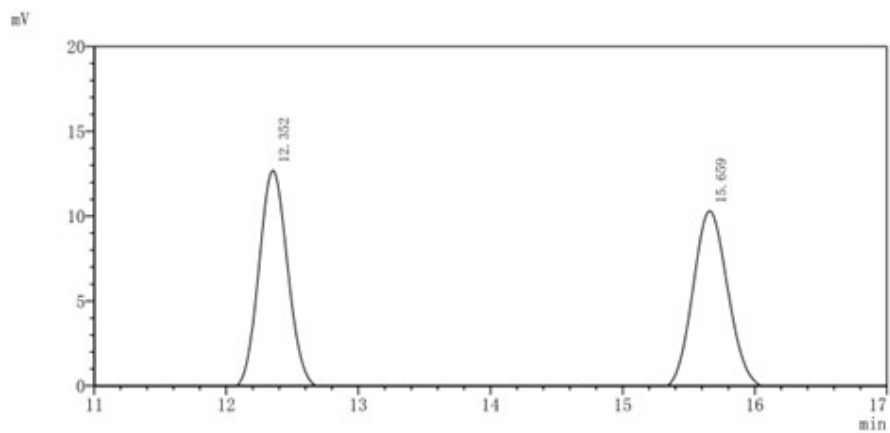

<Peak Results>

| Ch1 254nm |          |        |        |        |         |
|-----------|----------|--------|--------|--------|---------|
| Index     | Time/min | Area   | Area%  | Height | Height% |
| 1         | 12.352   | 196577 | 50.114 | 12880  | 55.080  |
| 2         | 15.659   | 195683 | 49.886 | 10504  | 44.920  |

Chiral HPLC spectrum of chiral (*S*)-**3t**

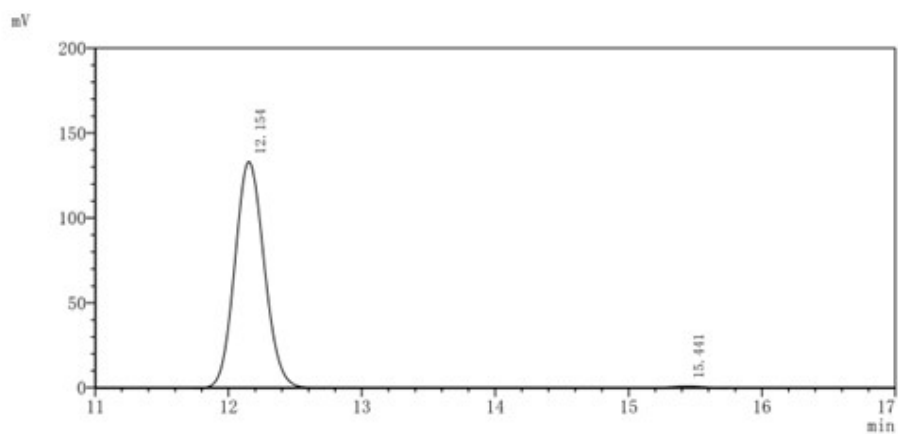

<Peak Results>

| Ch1 254nm |          |         |        |        |         |
|-----------|----------|---------|--------|--------|---------|
| Index     | Time/min | Area    | Area%  | Height | Height% |
| 1         | 12.154   | 2026368 | 99.352 | 133029 | 99.375  |
| 2         | 15.441   | 13220   | 0.648  | 836    | 0.625   |

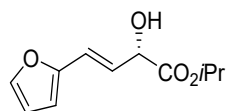

**3u**

*Chiral HPLC spectrum of racemic 3u*

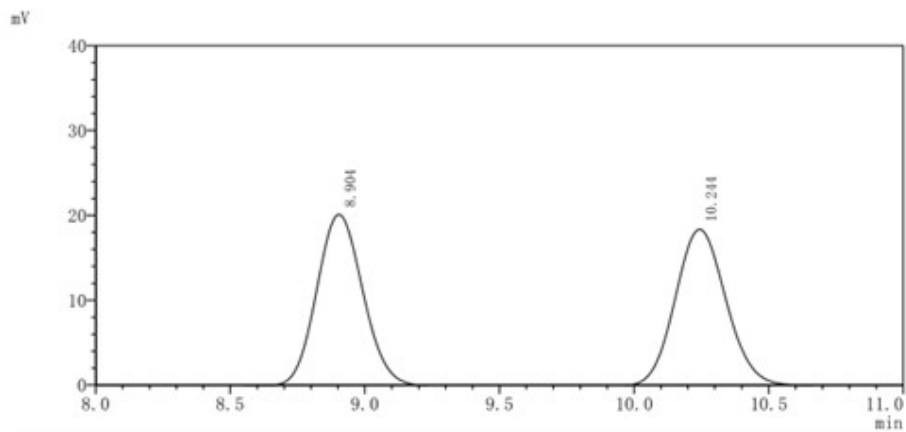

<Peak Results>

| Chl 254nm |          |        |        |        |         |
|-----------|----------|--------|--------|--------|---------|
| Index     | Time/min | Area   | Area%  | Height | Height% |
| 1         | 8.904    | 242264 | 49.791 | 20184  | 52.235  |
| 2         | 10.244   | 244297 | 50.209 | 18457  | 47.765  |

*Chiral HPLC spectrum of chiral (S)-3u*

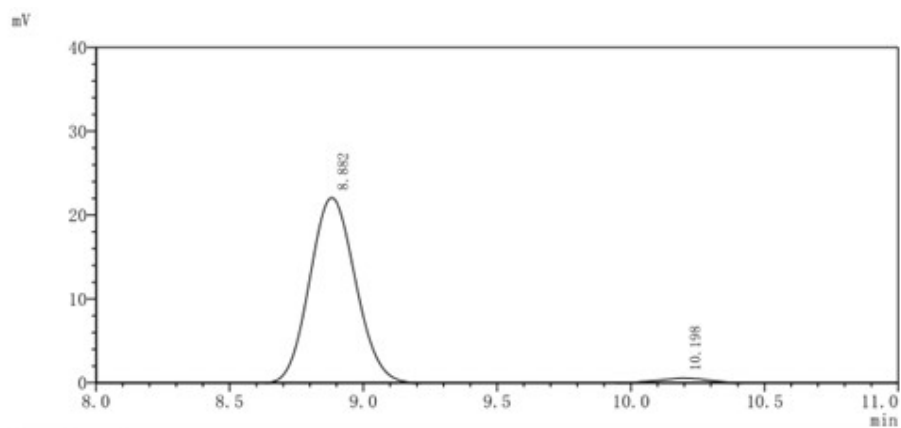

<Peak Results>

| Chl 254nm |          |        |        |        |         |
|-----------|----------|--------|--------|--------|---------|
| Index     | Time/min | Area   | Area%  | Height | Height% |
| 1         | 8.882    | 265058 | 96.574 | 22173  | 97.257  |
| 2         | 10.198   | 9403   | 3.426  | 625    | 2.743   |

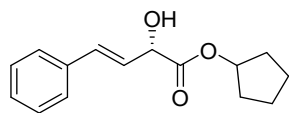

**3v**

*Chiral HPLC spectrum of racemic 3v*

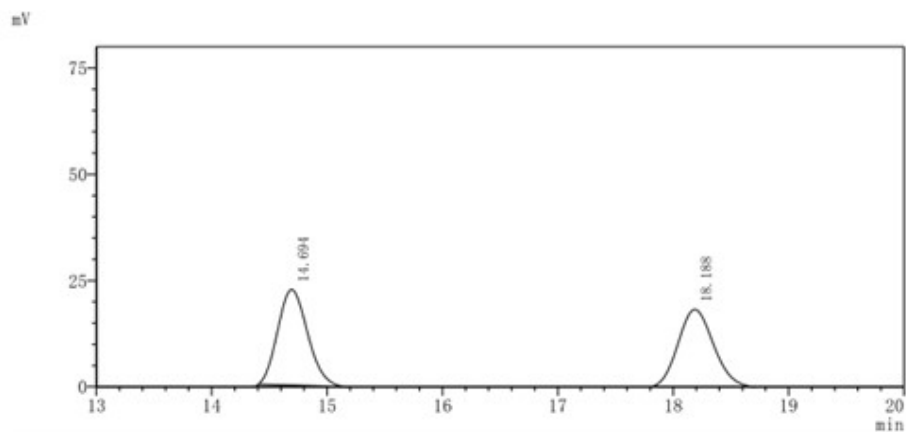

<Peak Results>

| Ch1 254nm |          |        |        |        |         |
|-----------|----------|--------|--------|--------|---------|
| Index     | Time/min | Area   | Area%  | Height | Height% |
| 1         | 14.694   | 406075 | 50.290 | 22509  | 54.974  |
| 2         | 18.188   | 401395 | 49.710 | 18436  | 45.026  |

*Chiral HPLC spectrum of chiral (S)-3v*

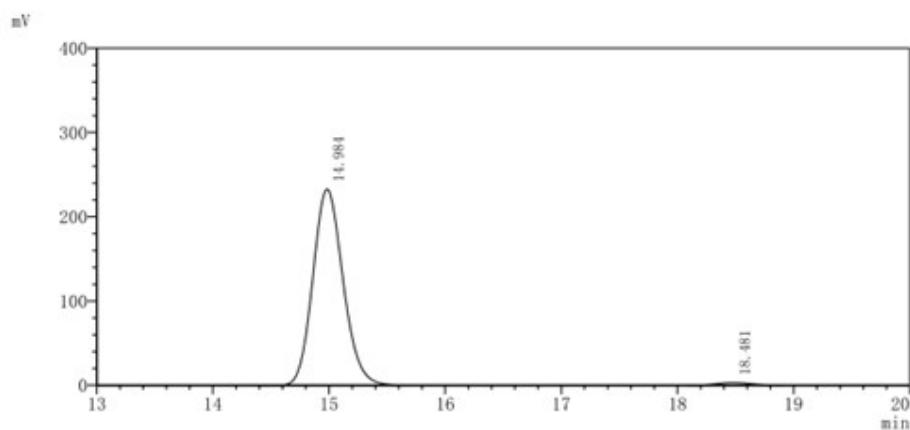

<Peak Results>

| Ch1 254nm |          |         |        |        |         |
|-----------|----------|---------|--------|--------|---------|
| Index     | Time/min | Area    | Area%  | Height | Height% |
| 1         | 14.984   | 4207399 | 98.426 | 232690 | 98.622  |
| 2         | 18.481   | 67273   | 1.574  | 3252   | 1.378   |

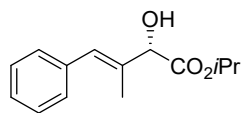

**5a**

*Chiral HPLC spectrum of racemic 5a*

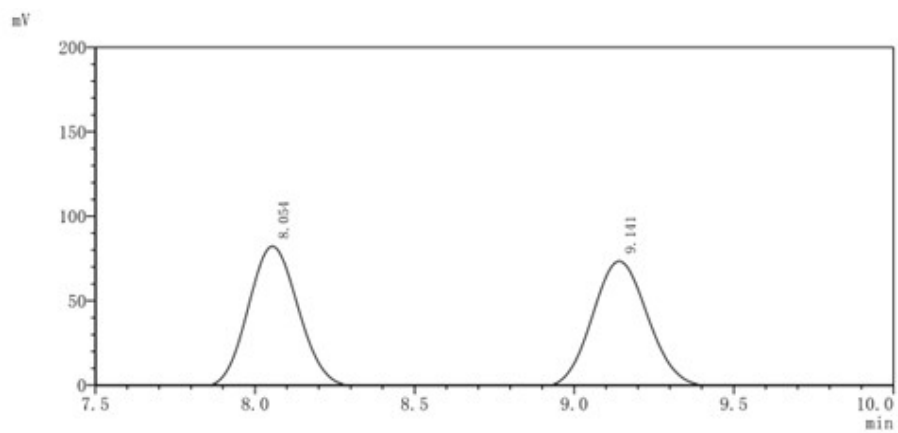

<Peak Results>

| Chl 254nm |          |        |        |        |         |
|-----------|----------|--------|--------|--------|---------|
| Index     | Time/min | Area   | Area%  | Height | Height% |
| 1         | 8.054    | 932578 | 49.992 | 83814  | 52.719  |
| 2         | 9.141    | 932875 | 50.008 | 75169  | 47.281  |

*Chiral HPLC spectrum of chiral (S)-5a*

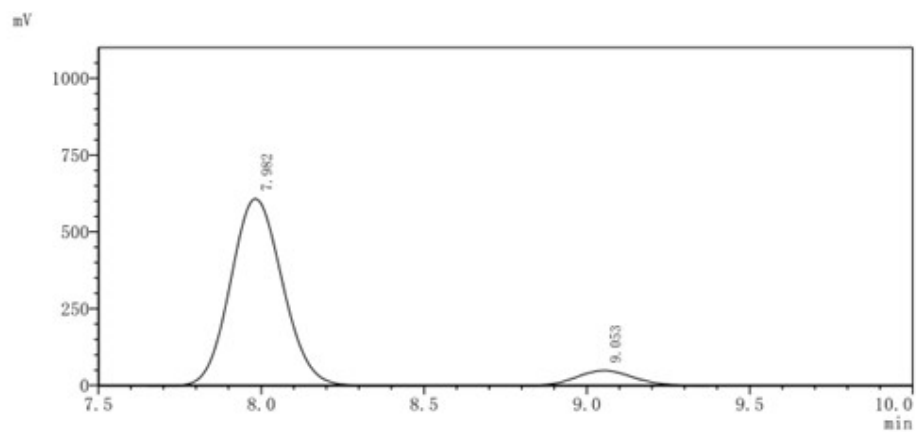

<Peak Results>

| Chl 254nm |          |         |        |        |         |
|-----------|----------|---------|--------|--------|---------|
| Index     | Time/min | Area    | Area%  | Height | Height% |
| 1         | 7.982    | 6735226 | 91.846 | 608648 | 92.573  |
| 2         | 9.053    | 597952  | 8.154  | 48831  | 7.427   |

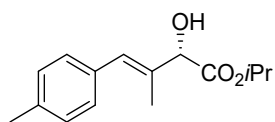

**5b**

*Chiral HPLC spectrum of racemic 5b*

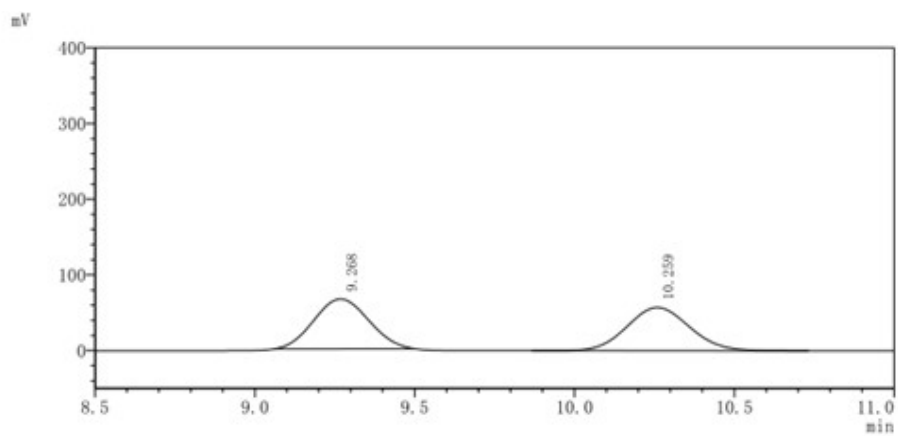

<Peak Results>

| Chl 254nm |          |        |        |        |         |
|-----------|----------|--------|--------|--------|---------|
| Index     | Time/min | Area   | Area%  | Height | Height% |
| 1         | 9.268    | 789848 | 50.333 | 65973  | 53.648  |
| 2         | 10.259   | 779391 | 49.667 | 57001  | 46.352  |

*Chiral HPLC spectrum of chiral (S)-5b*

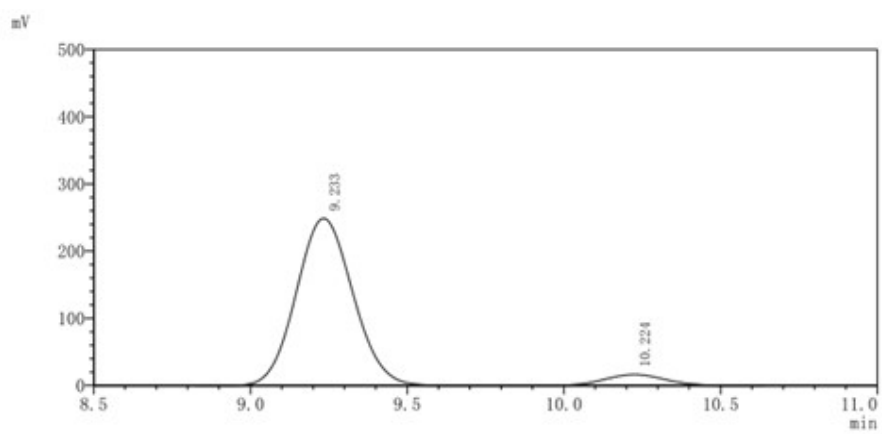

<Peak Results>

| Chl 254nm |          |         |        |        |         |
|-----------|----------|---------|--------|--------|---------|
| Index     | Time/min | Area    | Area%  | Height | Height% |
| 1         | 9.233    | 3144689 | 93.306 | 249009 | 93.784  |
| 2         | 10.224   | 225592  | 6.694  | 16503  | 6.216   |

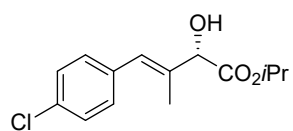

**5c**

*Chiral HPLC spectrum of racemic 5c*

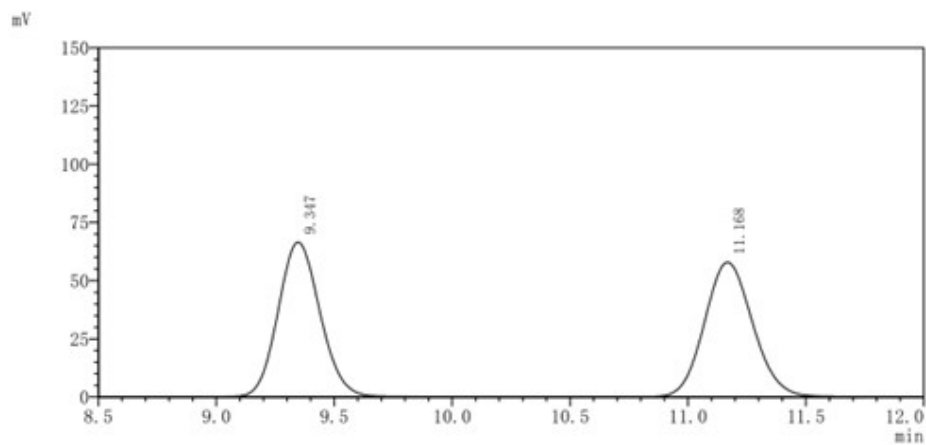

<Peak Results>

| Ch1 254nm |          |        |        |        |         |
|-----------|----------|--------|--------|--------|---------|
| Index     | Time/min | Area   | Area%  | Height | Height% |
| 1         | 9.347    | 818813 | 49.918 | 66295  | 53.451  |
| 2         | 11.168   | 821499 | 50.082 | 57735  | 46.549  |

*Chiral HPLC spectrum of chiral (S)-5c*

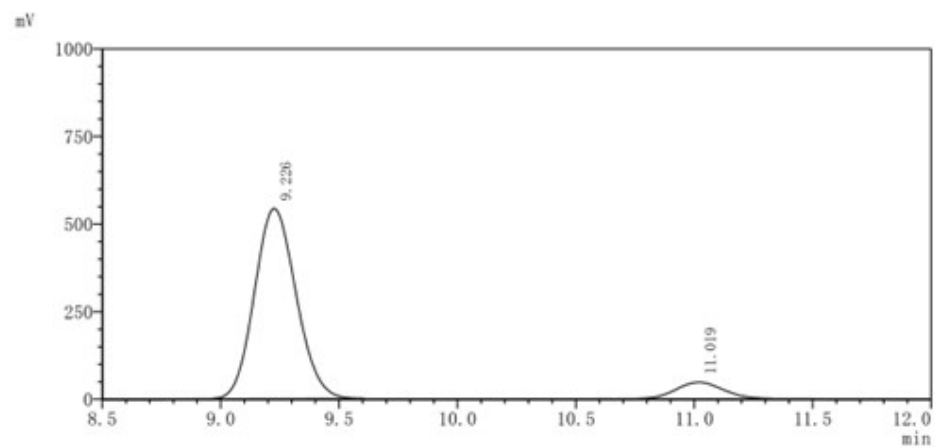

<Peak Results>

| Ch1 254nm |          |         |        |        |         |
|-----------|----------|---------|--------|--------|---------|
| Index     | Time/min | Area    | Area%  | Height | Height% |
| 1         | 9.226    | 6661893 | 90.831 | 543499 | 91.949  |
| 2         | 11.019   | 672513  | 9.169  | 47589  | 8.051   |

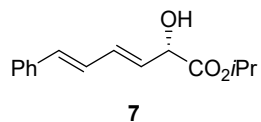

*Chiral HPLC spectrum of racemic 7*

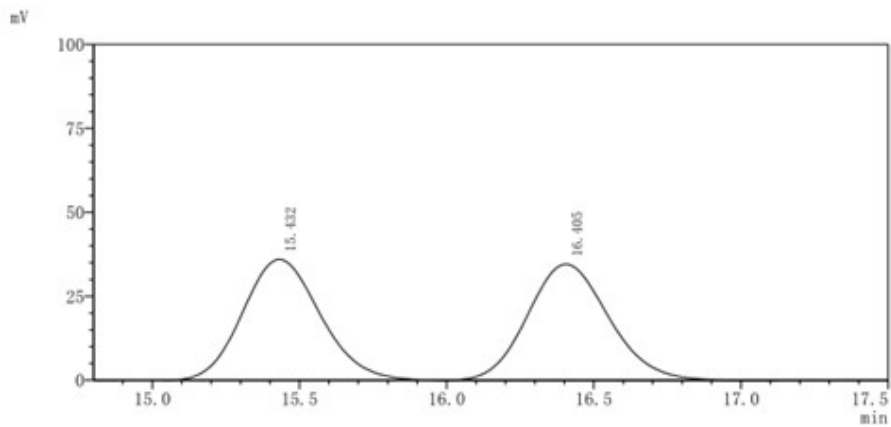

<Peak Results>

| Ch1 254nm |          |        |        |        |         |
|-----------|----------|--------|--------|--------|---------|
| Index     | Time/min | Area   | Area%  | Height | Height% |
| 1         | 15.432   | 663624 | 49.992 | 36035  | 51.059  |
| 2         | 16.405   | 663836 | 50.008 | 34541  | 48.941  |

*Chiral HPLC spectrum of chiral (S)-7*

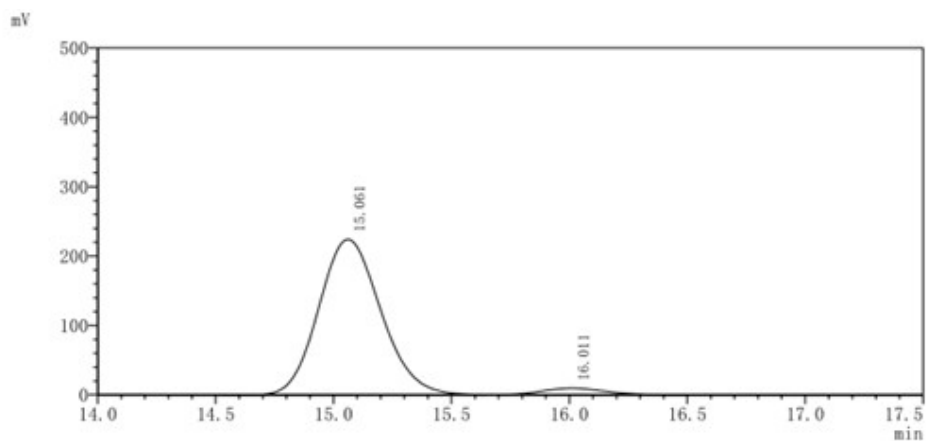

<Peak Results>

| Ch1 254nm |          |         |        |        |         |
|-----------|----------|---------|--------|--------|---------|
| Index     | Time/min | Area    | Area%  | Height | Height% |
| 1         | 15.061   | 4104927 | 96.047 | 224051 | 96.019  |
| 2         | 16.011   | 168927  | 3.953  | 9290   | 3.981   |

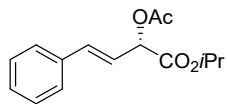

8

Chiral HPLC spectrum of racemic **8**

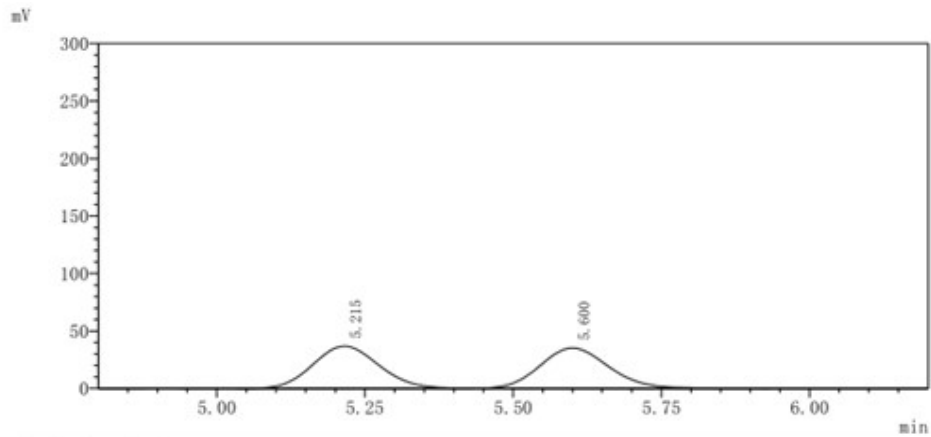

<Peak Results>

| Chl 254nm |          |        |        |        |         |
|-----------|----------|--------|--------|--------|---------|
| Index     | Time/min | Area   | Area%  | Height | Height% |
| 1         | 5.215    | 285579 | 50.458 | 36792  | 51.274  |
| 2         | 5.600    | 280399 | 49.542 | 34964  | 48.726  |

Chiral HPLC spectrum of chiral (*S*)-**8**

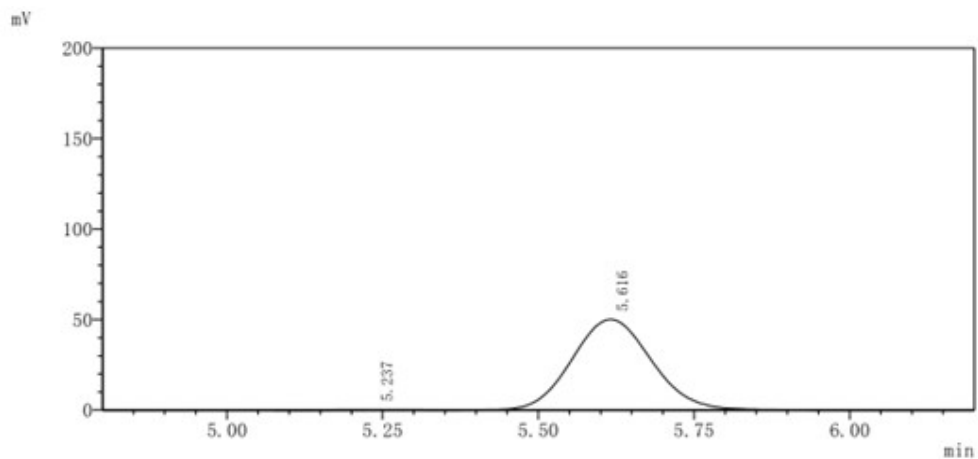

<Peak Results>

| Chl 254nm |          |        |        |        |         |
|-----------|----------|--------|--------|--------|---------|
| Index     | Time/min | Area   | Area%  | Height | Height% |
| 1         | 5.237    | 2095   | 0.473  | 243    | 0.484   |
| 2         | 5.616    | 440590 | 99.527 | 49976  | 99.516  |



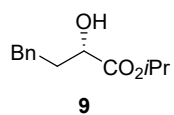

*Chiral HPLC spectrum of racemic 9*

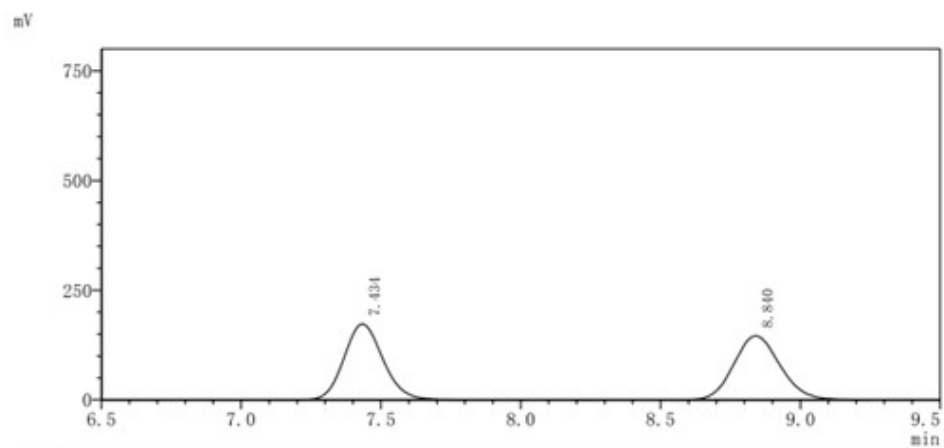

<Peak Results>  
Chl 254nm

| Index | Time/min | Area    | Area%  | Height | Height% |
|-------|----------|---------|--------|--------|---------|
| 1     | 7.434    | 1664380 | 49.961 | 172527 | 54.243  |
| 2     | 8.840    | 1666984 | 50.039 | 145538 | 45.757  |

*Chiral HPLC spectrum of chiral (S)-9*

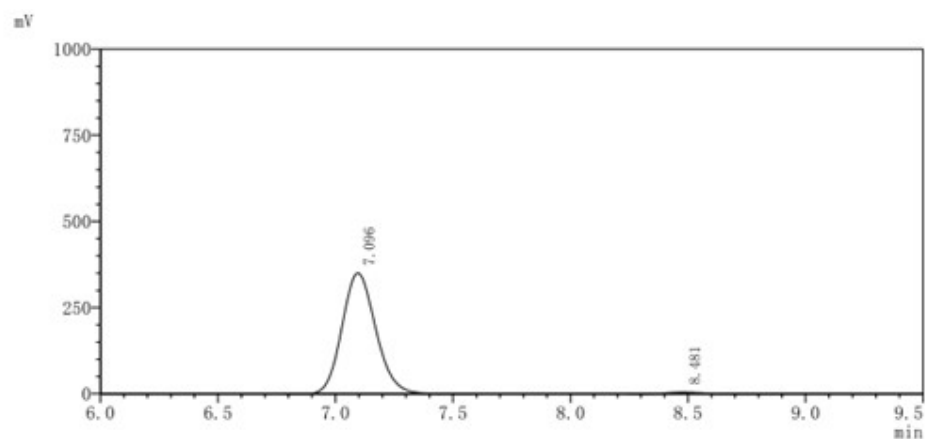

<Peak Results>  
Chl 254nm

| Index | Time/min | Area    | Area%  | Height | Height% |
|-------|----------|---------|--------|--------|---------|
| 1     | 7.096    | 3514277 | 98.592 | 350251 | 98.761  |
| 2     | 8.481    | 50195   | 1.408  | 4395   | 1.239   |

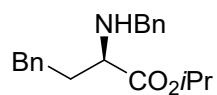

**10**

*Chiral HPLC spectrum of racemic 10*

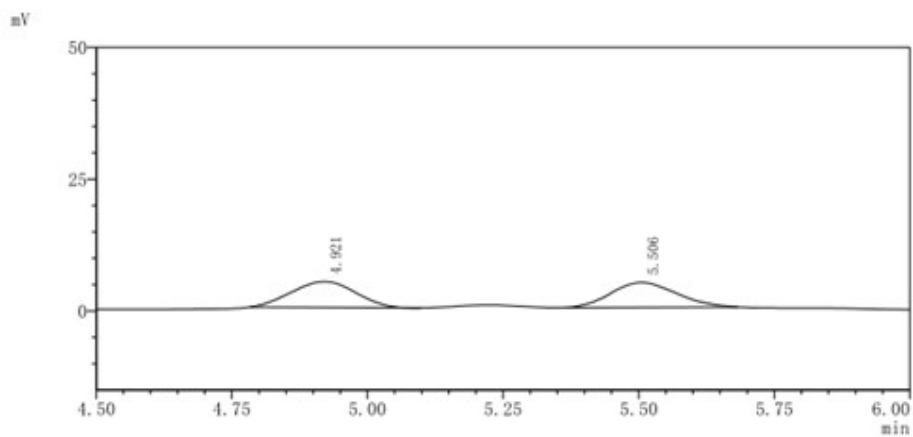

<Peak Results>  
Ch1 254nm

| Index | Time/min | Area  | Area%  | Height | Height% |
|-------|----------|-------|--------|--------|---------|
| 1     | 4.921    | 40350 | 50.261 | 4900   | 50.998  |
| 2     | 5.506    | 39932 | 49.739 | 4708   | 49.002  |

*Chiral HPLC spectrum of chiral (R)-10*

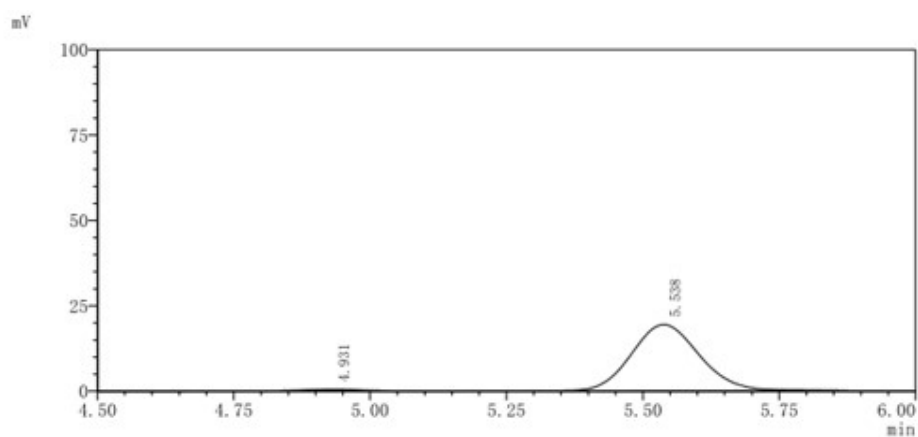

<Peak Results>  
Ch1 254nm

| Index | Time/min | Area   | Area%  | Height | Height% |
|-------|----------|--------|--------|--------|---------|
| 1     | 4.931    | 2596   | 1.530  | 395    | 2.004   |
| 2     | 5.538    | 167057 | 98.470 | 19327  | 97.996  |

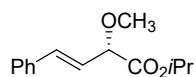

11

*Chiral HPLC spectrum of racemic 11*

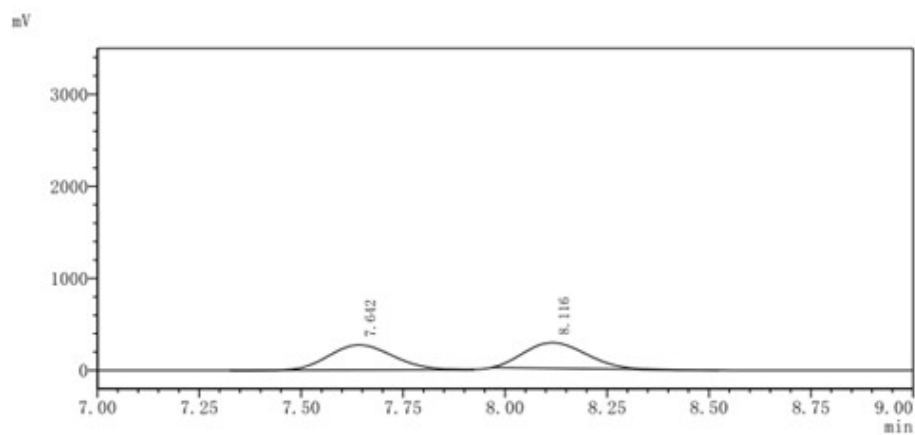

<Peak Results>  
Chl 254nm

| Index | Time/min | Area    | Area%  | Height | Height% |
|-------|----------|---------|--------|--------|---------|
| 1     | 7.642    | 2963930 | 50.316 | 272553 | 49.424  |
| 2     | 8.116    | 2926698 | 49.684 | 278902 | 50.576  |

*Chiral HPLC spectrum of chiral (S)-11*

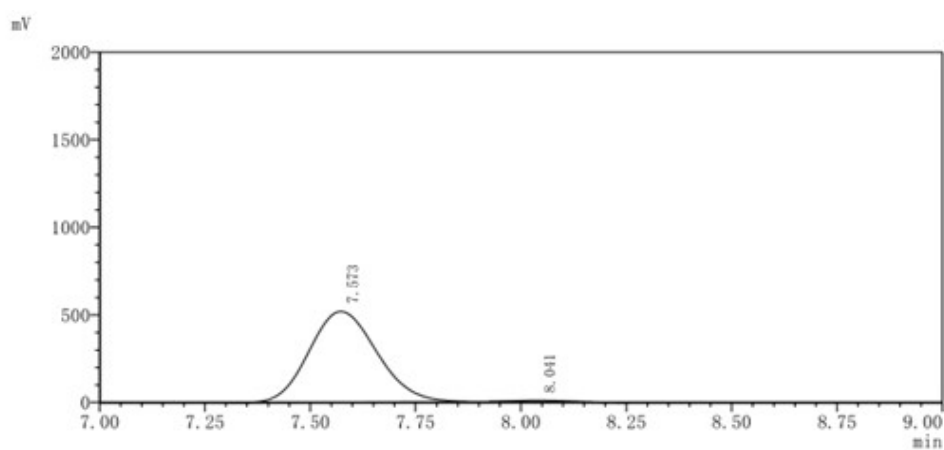

<Peak Results>  
Chl 254nm

| Index | Time/min | Area    | Area%  | Height | Height% |
|-------|----------|---------|--------|--------|---------|
| 1     | 7.573    | 5799534 | 98.608 | 517617 | 98.342  |
| 2     | 8.041    | 81863   | 1.392  | 8729   | 1.658   |

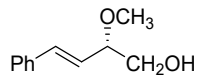

12

Chiral HPLC spectrum of racemic 12

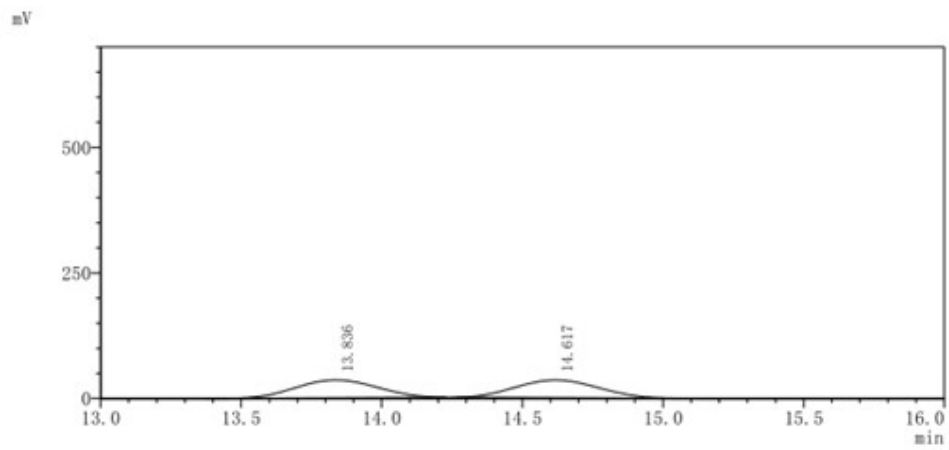

<Peak Results>

| Chl 254nm |          |        |        |        |         |
|-----------|----------|--------|--------|--------|---------|
| Index     | Time/min | Area   | Area%  | Height | Height% |
| 1         | 13.836   | 725834 | 49.937 | 35600  | 50.216  |
| 2         | 14.617   | 727651 | 50.063 | 35294  | 49.784  |

Chiral HPLC spectrum of chiral (S)-12

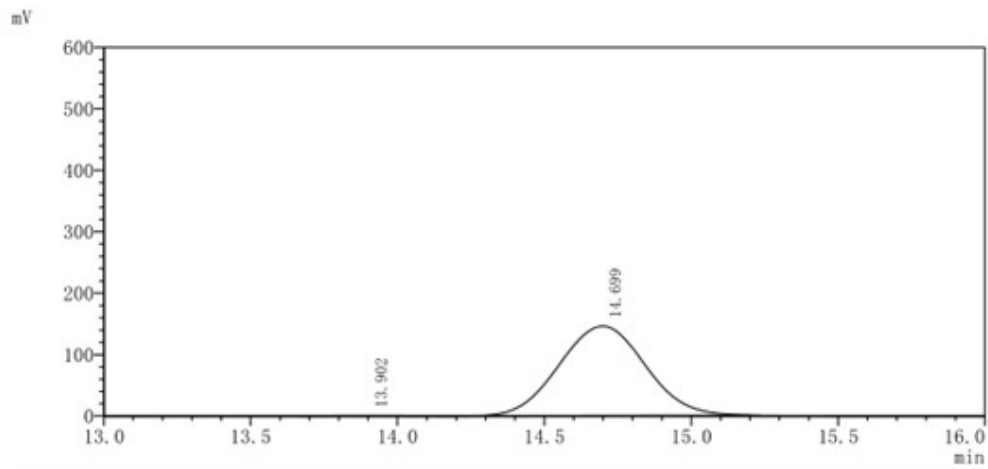

<Peak Results>

| Chl 254nm |          |         |        |        |         |
|-----------|----------|---------|--------|--------|---------|
| Index     | Time/min | Area    | Area%  | Height | Height% |
| 1         | 13.902   | 13706   | 0.458  | 799    | 0.546   |
| 2         | 14.699   | 2978318 | 99.542 | 145431 | 99.454  |

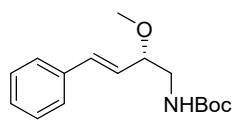

**13**

*Chiral HPLC spectrum of racemic 13*

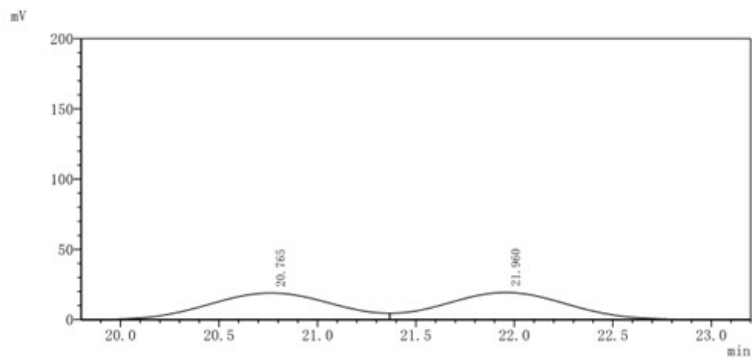

<Peak Results>

| Ch1 254nm |          |        |        |        |         |
|-----------|----------|--------|--------|--------|---------|
| Index     | Time/min | Area   | Area%  | Height | Height% |
| 1         | 20.765   | 845900 | 49.993 | 19024  | 49.514  |
| 2         | 21.960   | 846128 | 50.007 | 19398  | 50.486  |

*Chiral HPLC spectrum of chiral (S)-13*

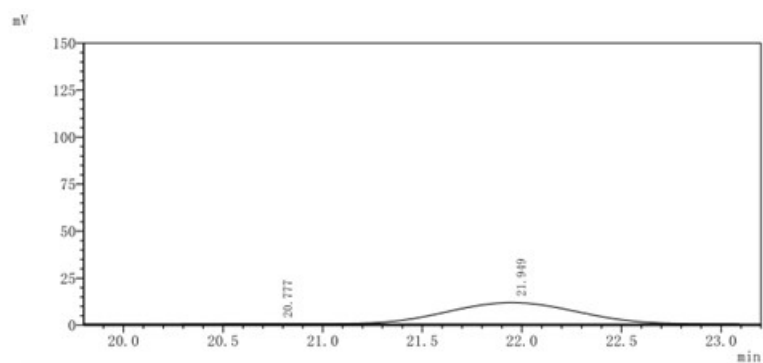

<Peak Results>

| Ch1 254nm |          |        |        |        |         |
|-----------|----------|--------|--------|--------|---------|
| Index     | Time/min | Area   | Area%  | Height | Height% |
| 1         | 20.777   | 3096   | 0.586  | 142    | 1.234   |
| 2         | 21.949   | 525089 | 99.414 | 11393  | 98.766  |

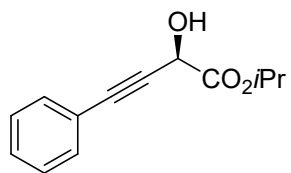

**15a**

*Chiral HPLC spectrum of racemic 15a*

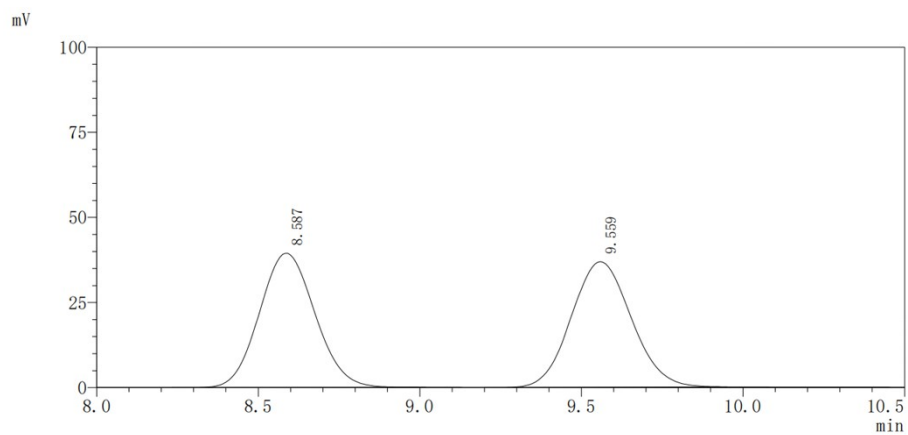

<Peak Results>

| Index | Time/min | Area   | Area%  | Height | Height% |
|-------|----------|--------|--------|--------|---------|
| 1     | 8.587    | 471469 | 49.778 | 39430  | 51.663  |
| 2     | 9.559    | 475674 | 50.222 | 36892  | 48.337  |

*Chiral HPLC spectrum of chiral (R)-15a*

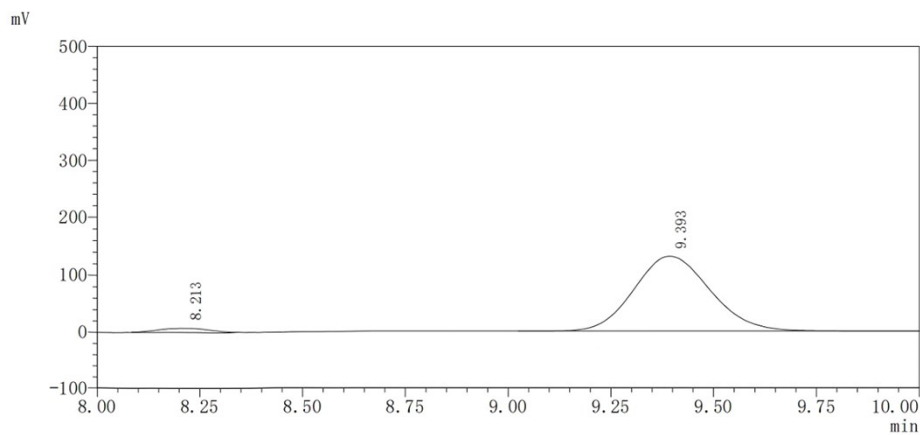

<Peak Results>

| Index | Time/min | Area    | Area%  | Height | Height% |
|-------|----------|---------|--------|--------|---------|
| 1     | 8.213    | 65751   | 3.718  | 7391   | 5.324   |
| 2     | 9.393    | 1702875 | 96.282 | 131420 | 94.676  |

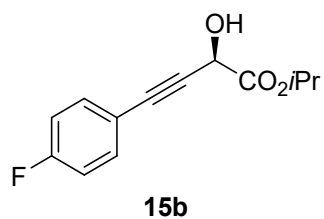

*Chiral HPLC spectrum of racemic 15b*

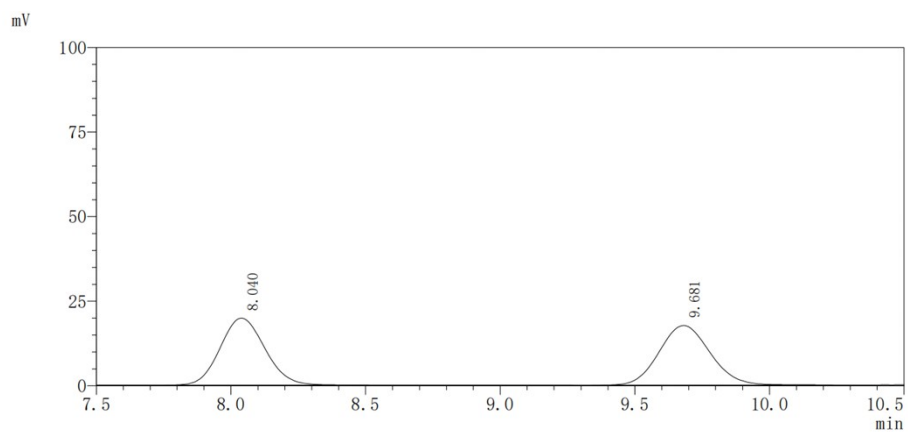

<Peak Results>

| Index | Time/min | Area   | Area%  | Height | Height% |
|-------|----------|--------|--------|--------|---------|
| 1     | 8.040    | 228563 | 49.568 | 19822  | 52.926  |
| 2     | 9.681    | 232544 | 50.432 | 17631  | 47.074  |

*Chiral HPLC spectrum of chiral (R)-15b*

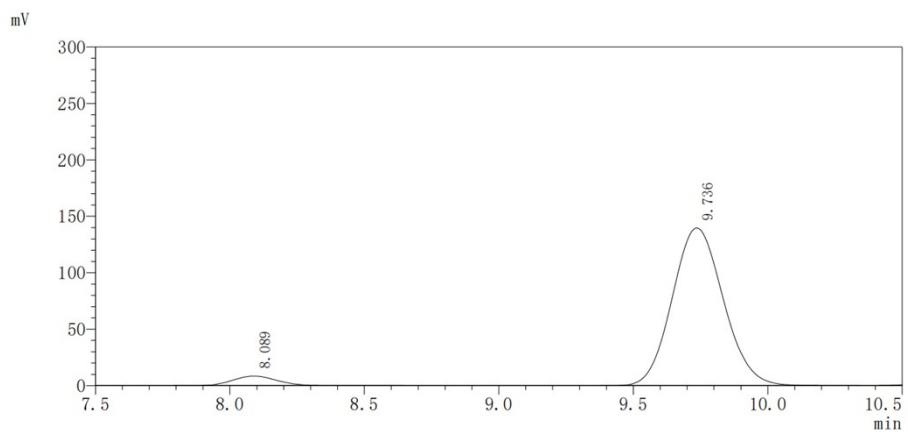

<Peak Results>

| Index | Time/min | Area    | Area%  | Height | Height% |
|-------|----------|---------|--------|--------|---------|
| 1     | 8.089    | 98516   | 5.054  | 8477   | 5.719   |
| 2     | 9.736    | 1850916 | 94.946 | 139743 | 94.281  |

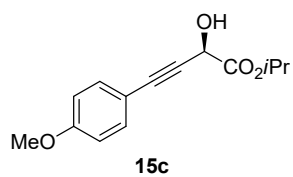

*Chiral HPLC spectrum of racemic 15c*

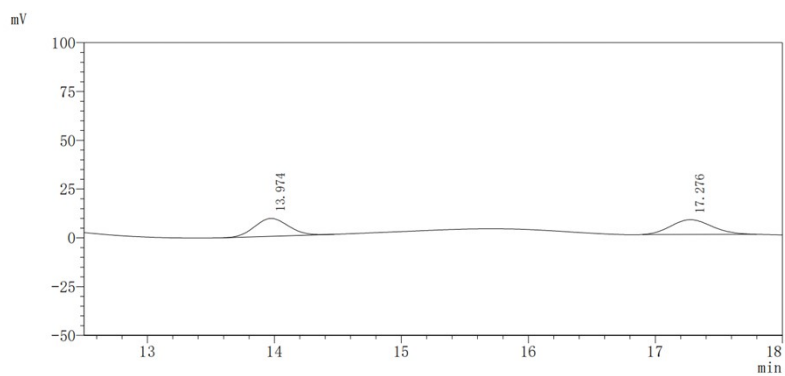

<Peak Results>

| Index | Time/min | Area   | Area%  | Height | Height% |
|-------|----------|--------|--------|--------|---------|
| 1     | 13.974   | 169587 | 50.125 | 9141   | 54.821  |
| 2     | 17.276   | 168744 | 49.875 | 7533   | 45.179  |

*Chiral HPLC spectrum of chiral (R)-15c*

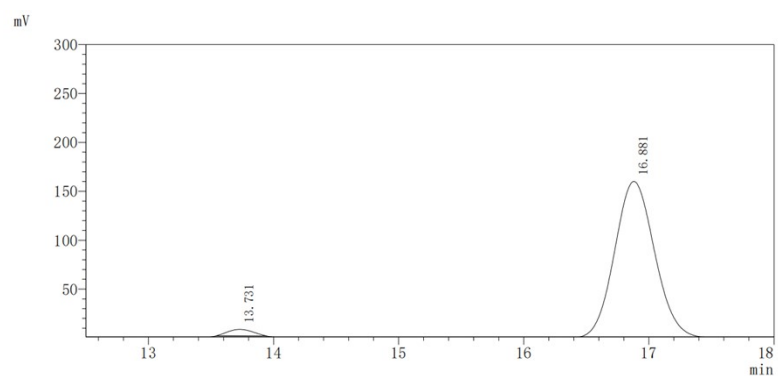

<Peak Results>

| Index | Time/min | Area    | Area%  | Height | Height% |
|-------|----------|---------|--------|--------|---------|
| 1     | 13.731   | 90495   | 2.468  | 6583   | 3.947   |
| 2     | 16.881   | 3576019 | 97.532 | 160184 | 96.053  |



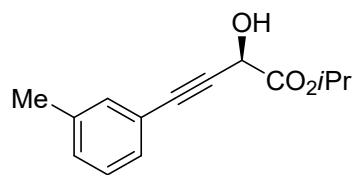

**15d**

*Chiral HPLC spectrum of racemic 15d*

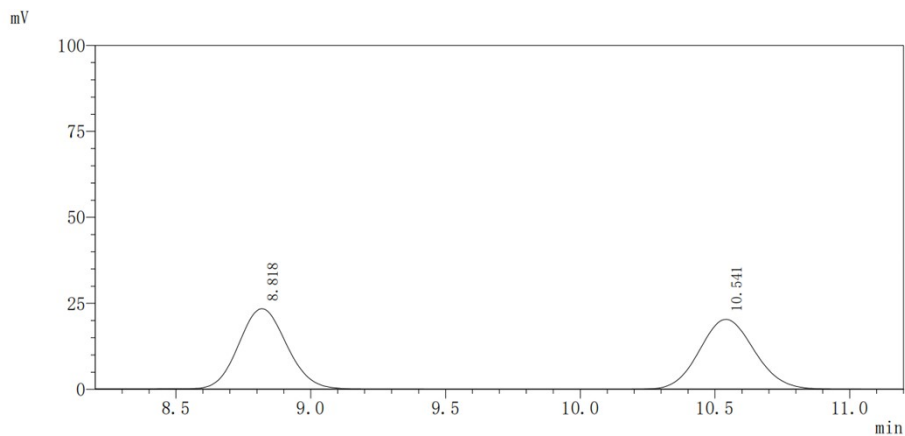

<Peak Results>

| Index | Time/min | Area   | Area%  | Height | Height% |
|-------|----------|--------|--------|--------|---------|
| 1     | 8.818    | 296540 | 50.426 | 23497  | 53.519  |
| 2     | 10.541   | 291533 | 49.574 | 20407  | 46.481  |

*Chiral HPLC spectrum of chiral (R)-15d*

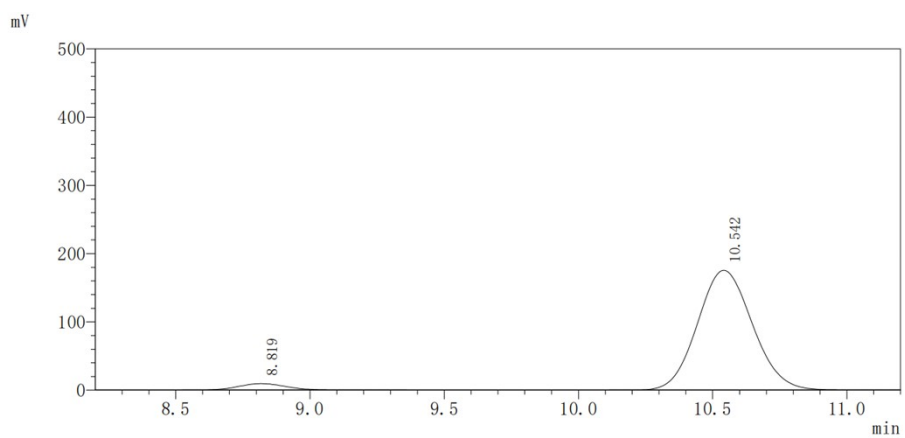

<Peak Results>

| Index | Time/min | Area    | Area%  | Height | Height% |
|-------|----------|---------|--------|--------|---------|
| 1     | 8.819    | 119742  | 4.556  | 9590   | 5.172   |
| 2     | 10.542   | 2508500 | 95.444 | 175823 | 94.828  |

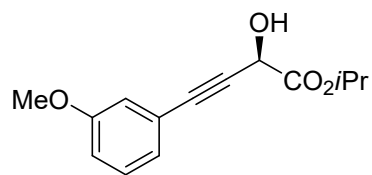

**15e**

*Chiral HPLC spectrum of racemic 15e*

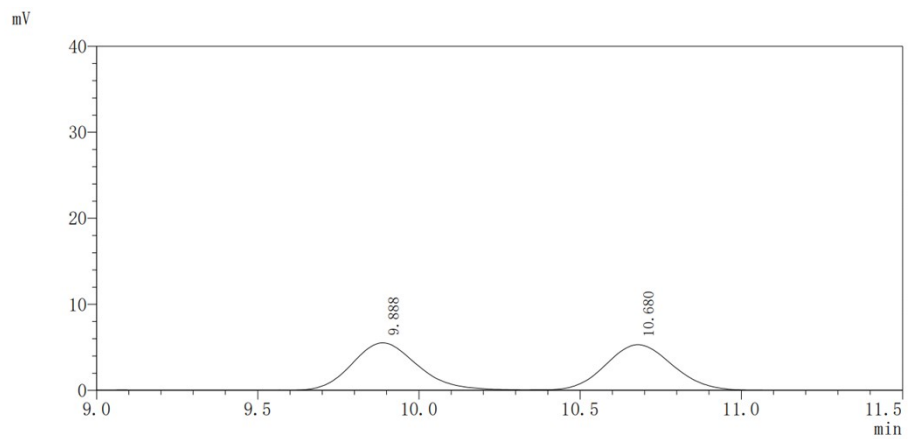

<Peak Results>

| Index | Time/min | Area  | Area%  | Height | Height% |
|-------|----------|-------|--------|--------|---------|
| 1     | 9.888    | 79834 | 50.201 | 5540   | 50.860  |
| 2     | 10.680   | 79196 | 49.799 | 5352   | 49.140  |

*Chiral HPLC spectrum of chiral (R)-15e*

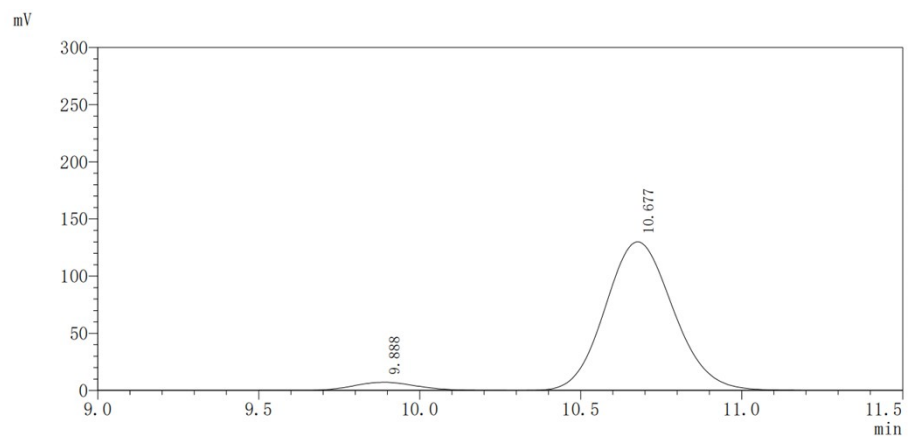

<Peak Results>

| Index | Time/min | Area    | Area%  | Height | Height% |
|-------|----------|---------|--------|--------|---------|
| 1     | 9.888    | 100059  | 4.964  | 7211   | 5.256   |
| 2     | 10.677   | 1915740 | 95.036 | 129968 | 94.744  |

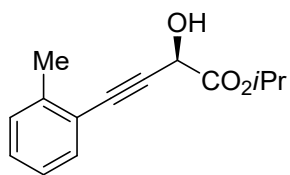

**15f**

*Chiral HPLC spectrum of racemic 15f*

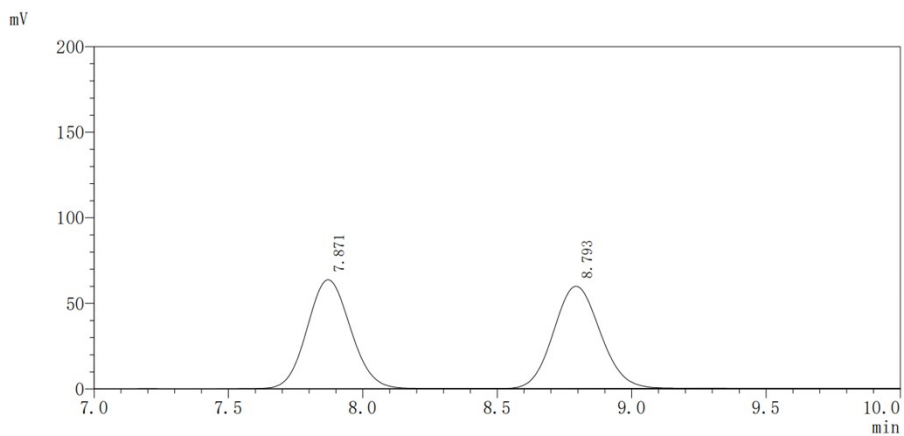

<Peak Results>

| Index | Time/min | Area   | Area%  | Height | Height% |
|-------|----------|--------|--------|--------|---------|
| 1     | 7.871    | 719590 | 49.961 | 63681  | 51.594  |
| 2     | 8.793    | 720725 | 50.039 | 59747  | 48.406  |

*Chiral HPLC spectrum of chiral (R)-15f*

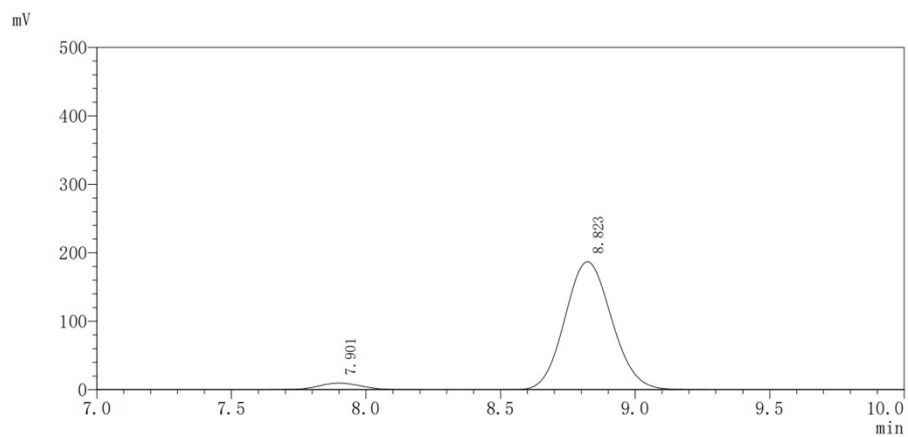

<Peak Results>

| Index | Time/min | Area    | Area%  | Height | Height% |
|-------|----------|---------|--------|--------|---------|
| 1     | 7.901    | 105248  | 4.447  | 9576   | 4.868   |
| 2     | 8.823    | 2261330 | 95.553 | 187135 | 95.132  |

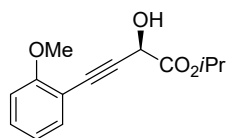

**15g**

*Chiral HPLC spectrum of racemic 15g*

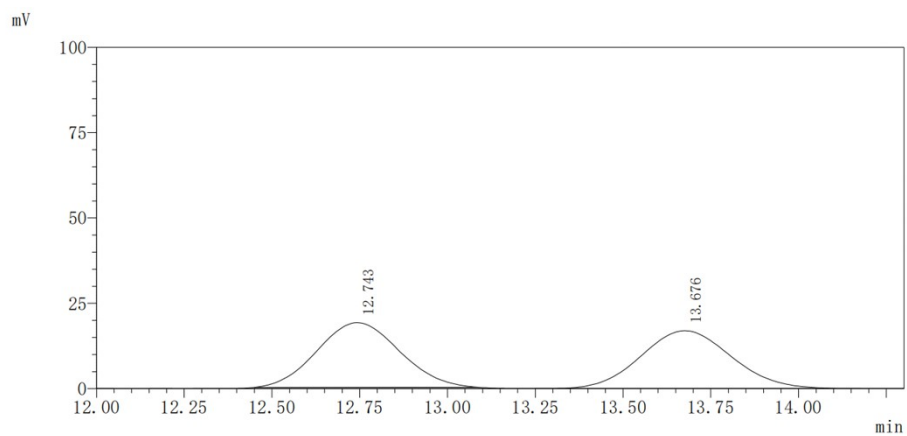

<Peak Results>

| Index | Time/min | Area   | Area%  | Height | Height% |
|-------|----------|--------|--------|--------|---------|
| 1     | 12.743   | 308749 | 50.178 | 18947  | 52.715  |
| 2     | 13.676   | 306559 | 49.822 | 16996  | 47.285  |

*Chiral HPLC spectrum of chiral (R)-15g*

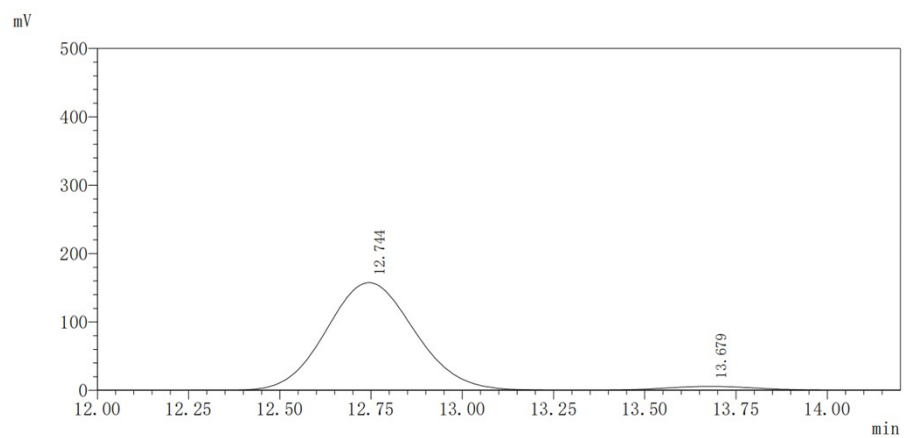

<Peak Results>

| Index | Time/min | Area    | Area%  | Height | Height% |
|-------|----------|---------|--------|--------|---------|
| 1     | 12.744   | 2674330 | 96.101 | 157671 | 96.386  |
| 2     | 13.679   | 108504  | 3.899  | 5912   | 3.614   |

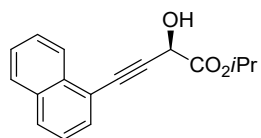

**15h**

*Chiral HPLC spectrum of racemic 15h*

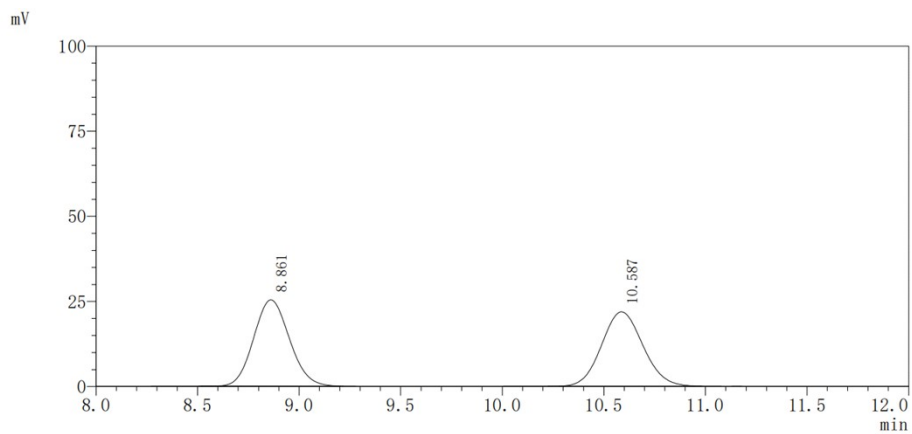

<Peak Results>

| Index | Time/min | Area   | Area%  | Height | Height% |
|-------|----------|--------|--------|--------|---------|
| 1     | 8.861    | 311138 | 50.101 | 25348  | 53.676  |
| 2     | 10.587   | 309879 | 49.899 | 21876  | 46.324  |

*Chiral HPLC spectrum of chiral (R)-15h*

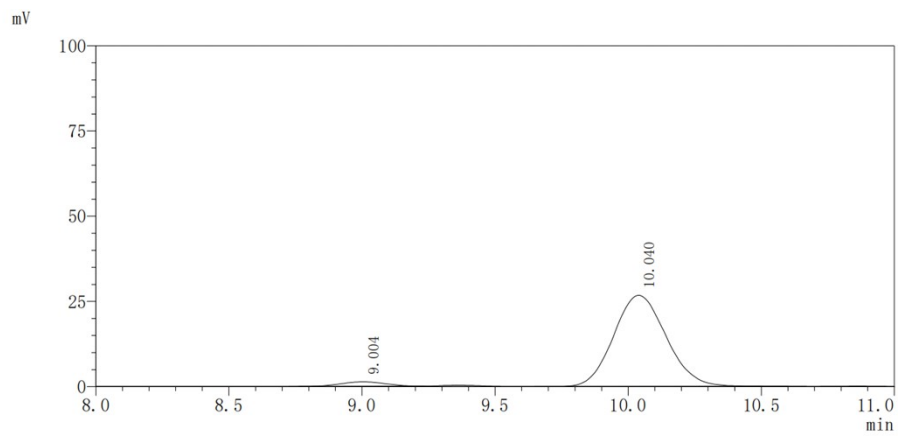

<Peak Results>

| Index | Time/min | Area   | Area%  | Height | Height% |
|-------|----------|--------|--------|--------|---------|
| 1     | 9.004    | 15477  | 4.016  | 1311   | 4.661   |
| 2     | 10.040   | 369871 | 95.984 | 26815  | 95.339  |

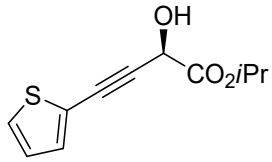

**15i**

*Chiral HPLC spectrum of racemic 15i*

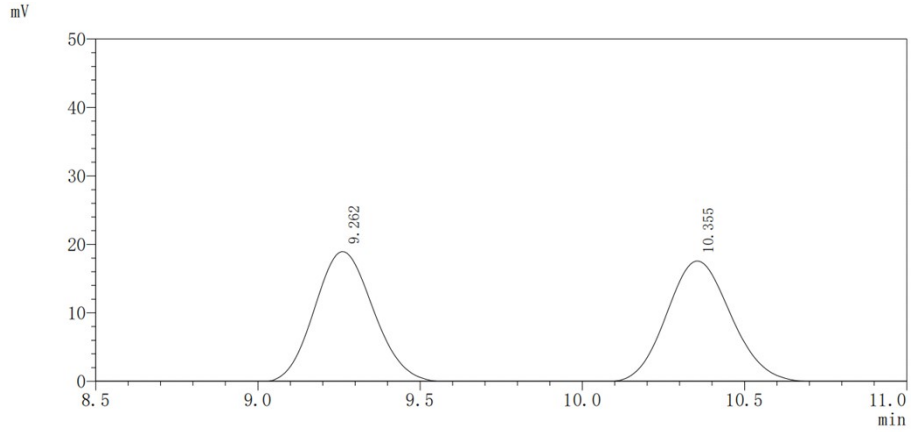

<Peak Results>

| Index | Time/min | Area   | Area%  | Height | Height% |
|-------|----------|--------|--------|--------|---------|
| 1     | 9.262    | 248118 | 49.681 | 19234  | 51.908  |
| 2     | 10.355   | 251307 | 50.319 | 17820  | 48.092  |

*Chiral HPLC spectrum of chiral (R)-15i*

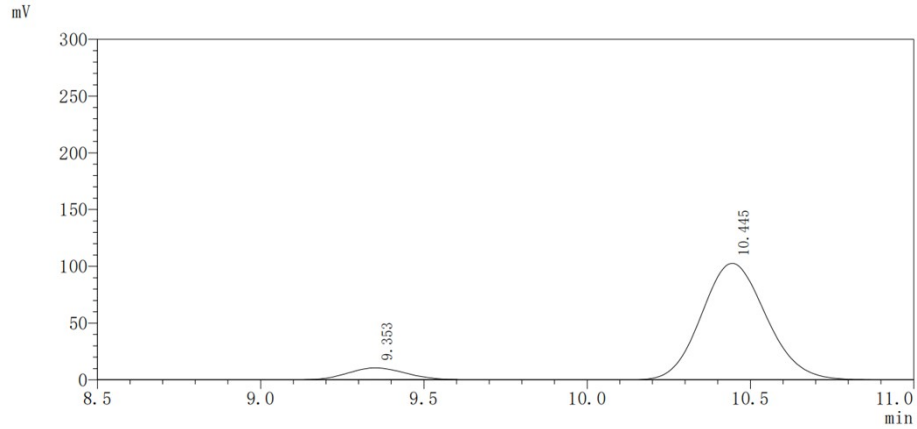

<Peak Results>

| Index | Time/min | Area    | Area%  | Height | Height% |
|-------|----------|---------|--------|--------|---------|
| 1     | 9.353    | 125912  | 8.183  | 10389  | 9.199   |
| 2     | 10.445   | 1412872 | 91.817 | 102547 | 90.801  |

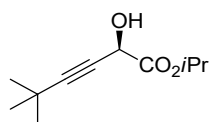

**15j**

*Chiral HPLC spectrum of racemic 15j*

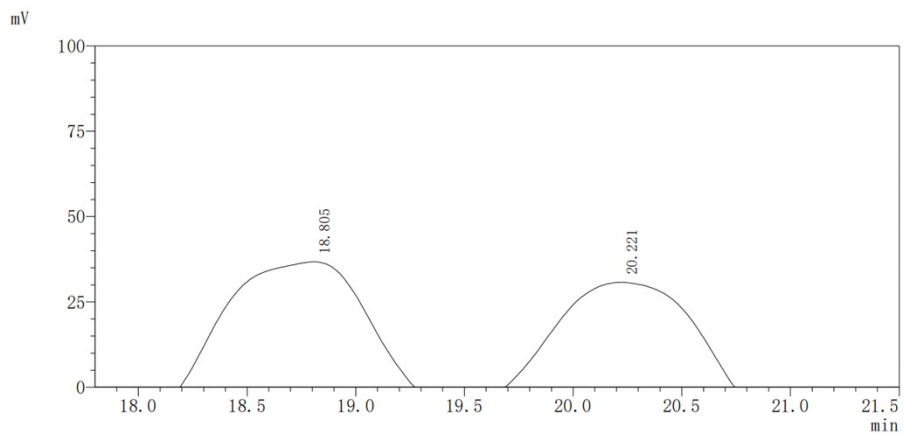

<Peak Results>

| Index | Time/min | Area    | Area%  | Height | Height% |
|-------|----------|---------|--------|--------|---------|
| 1     | 18.805   | 1917649 | 49.649 | 42164  | 51.205  |
| 2     | 20.221   | 1944768 | 50.351 | 40178  | 48.795  |

*Chiral HPLC spectrum of chiral (R)-15j*

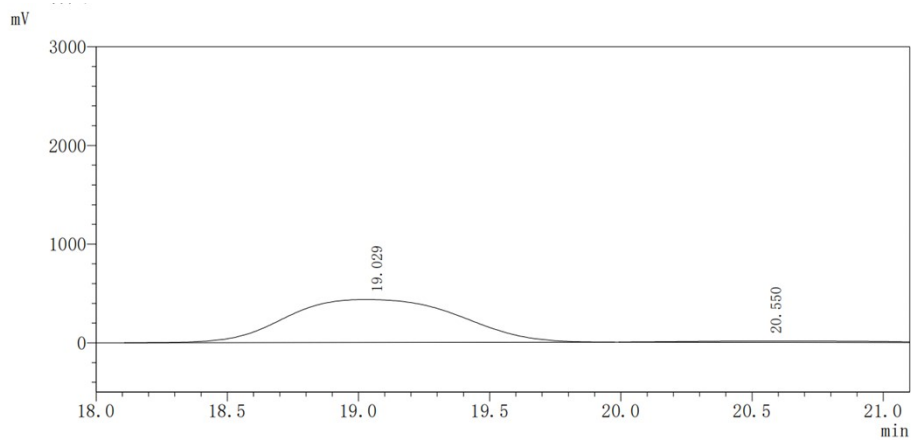

<Peak Results>

| Index | Time/min | Area     | Area%  | Height | Height% |
|-------|----------|----------|--------|--------|---------|
| 1     | 19.029   | 19623474 | 96.791 | 435368 | 97.038  |
| 2     | 20.550   | 650582   | 3.209  | 13291  | 2.962   |

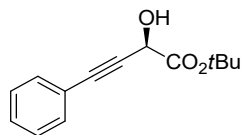

**15k**

*Chiral HPLC spectrum of racemic 15k*

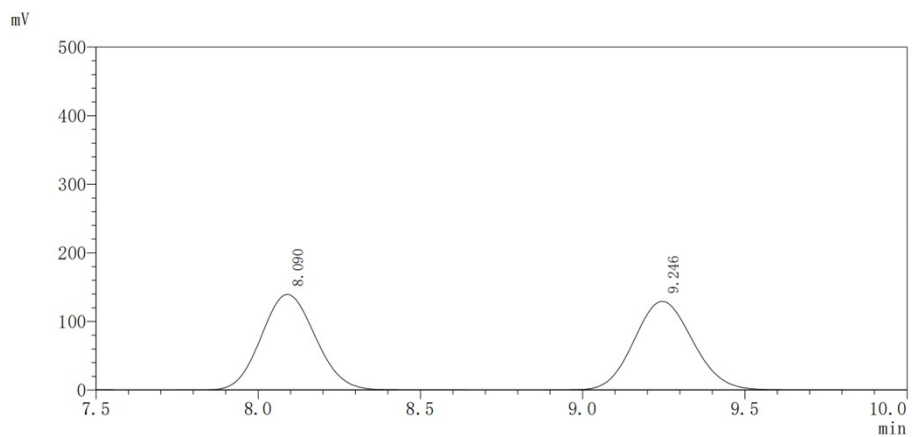

<Peak Results>

| Index | Time/min | Area    | Area%  | Height | Height% |
|-------|----------|---------|--------|--------|---------|
| 1     | 8.090    | 1618813 | 49.753 | 139377 | 51.905  |
| 2     | 9.246    | 1634909 | 50.247 | 129146 | 48.095  |

*Chiral HPLC spectrum of chiral (R)-15k*

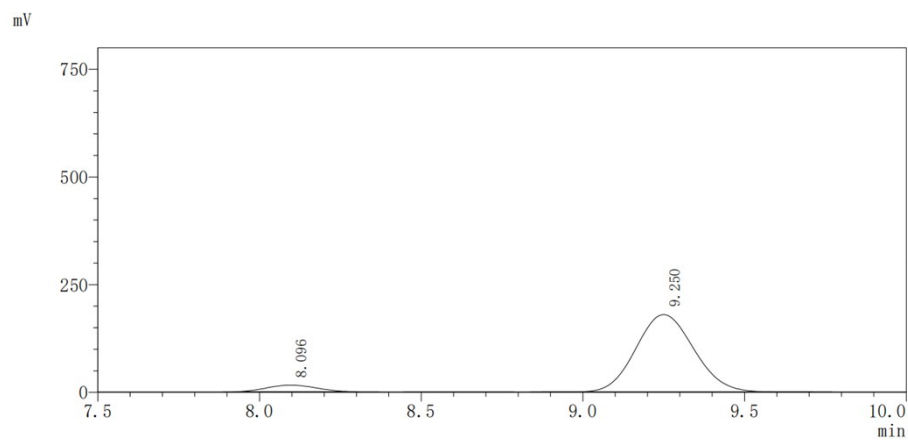

<Peak Results>

| Index | Time/min | Area    | Area%  | Height | Height% |
|-------|----------|---------|--------|--------|---------|
| 1     | 8.096    | 160848  | 6.642  | 15269  | 7.813   |
| 2     | 9.250    | 2260752 | 93.358 | 180164 | 92.187  |



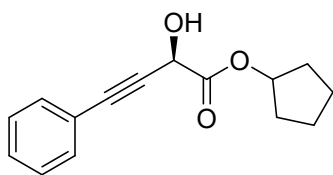

**15I**

*Chiral HPLC spectrum of racemic 15I*

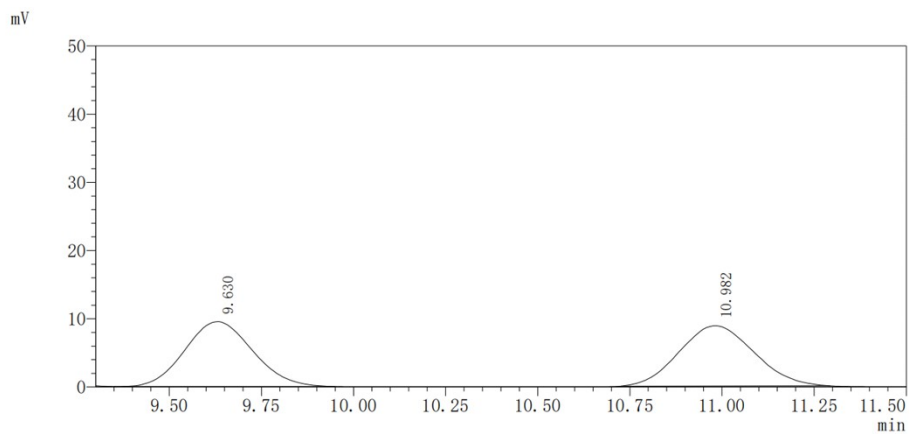

<Peak Results>

| Index | Time/min | Area   | Area%  | Height | Height% |
|-------|----------|--------|--------|--------|---------|
| 1     | 9.630    | 121995 | 49.515 | 9518   | 51.893  |
| 2     | 10.982   | 124386 | 50.485 | 8823   | 48.107  |

*Chiral HPLC spectrum of chiral (R)-15I*

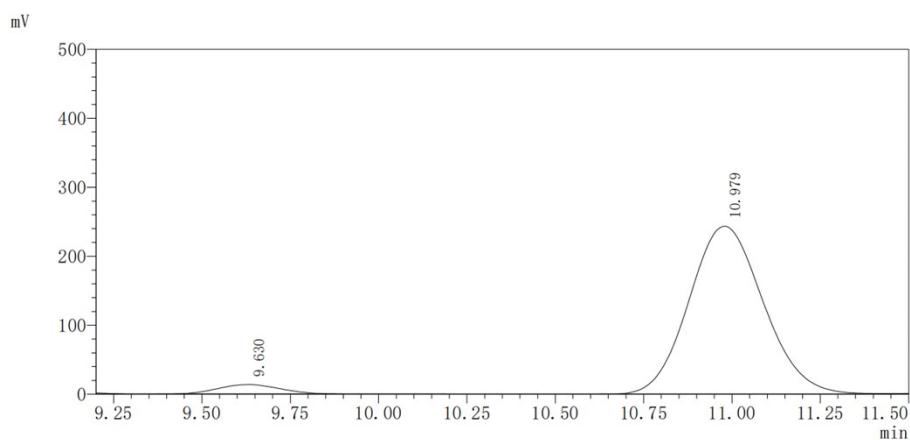

<Peak Results>

| Index | Time/min | Area    | Area%  | Height | Height% |
|-------|----------|---------|--------|--------|---------|
| 1     | 9.630    | 174866  | 4.640  | 13942  | 5.408   |
| 2     | 10.979   | 3593516 | 95.360 | 243866 | 94.592  |

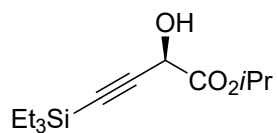

**15m**

*Chiral HPLC spectrum of racemic 15m*

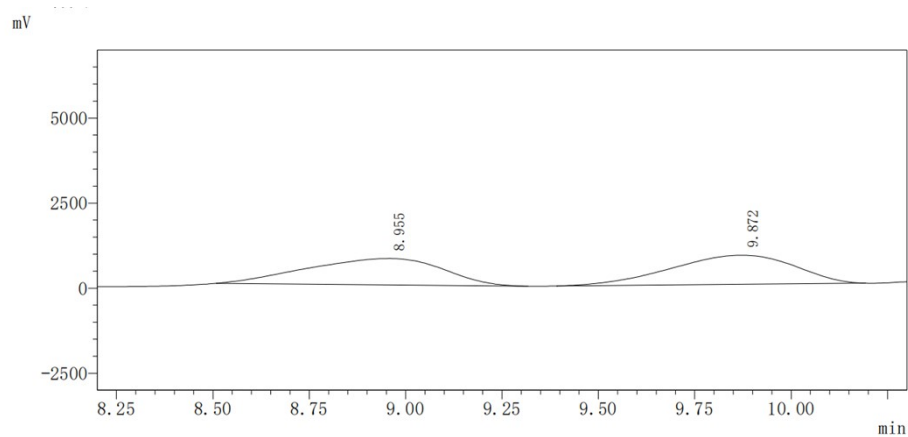

<Peak Results>

| Index | Time/min | Area     | Area%  | Height | Height% |
|-------|----------|----------|--------|--------|---------|
| 1     | 8.955    | 18957347 | 49.844 | 776118 | 47.561  |
| 2     | 9.872    | 19075766 | 50.156 | 855733 | 52.439  |

*Chiral HPLC spectrum of chiral (R)-15m*

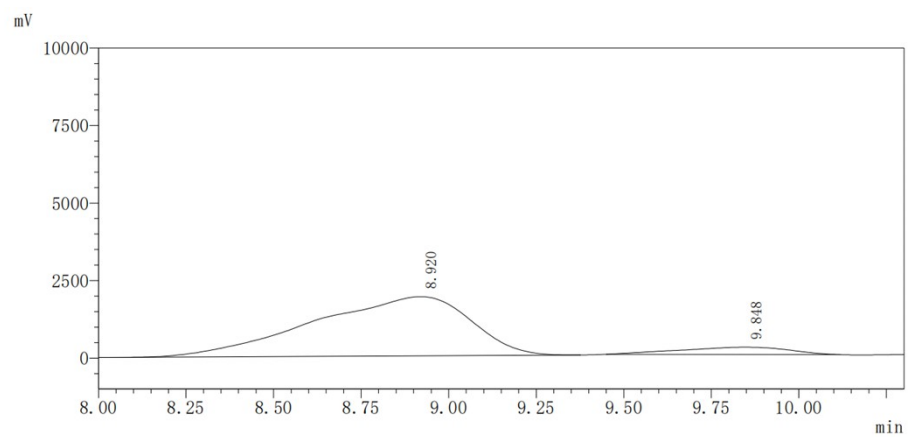

<Peak Results>

| Index | Time/min | Area     | Area%  | Height  | Height% |
|-------|----------|----------|--------|---------|---------|
| 1     | 8.920    | 59746685 | 92.188 | 1909460 | 89.041  |
| 2     | 9.848    | 5062808  | 7.812  | 235023  | 10.959  |

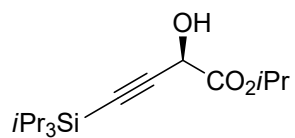

**15n**

*Chiral HPLC spectrum of racemic 15n*

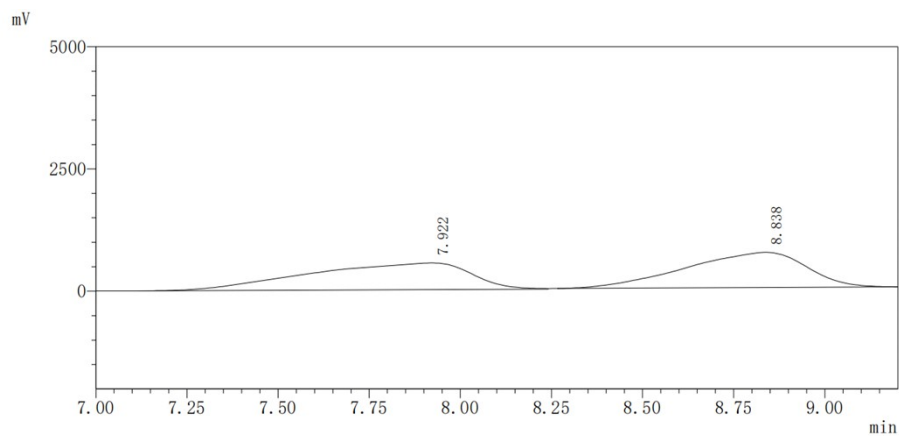

<Peak Results>

| Index | Time/min | Area     | Area%  | Height | Height% |
|-------|----------|----------|--------|--------|---------|
| 1     | 7.922    | 16901803 | 50.421 | 545086 | 43.162  |
| 2     | 8.838    | 16619743 | 49.579 | 717790 | 56.838  |

*Chiral HPLC spectrum of chiral (R)-15n*

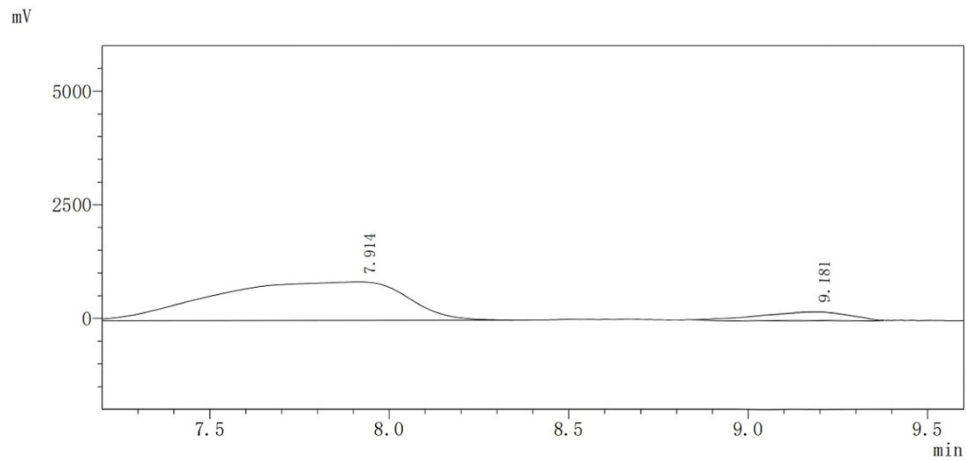

<Peak Results>

| Index | Time/min | Area     | Area%  | Height | Height% |
|-------|----------|----------|--------|--------|---------|
| 1     | 7.914    | 31488987 | 91.397 | 844779 | 84.098  |
| 2     | 9.181    | 2963952  | 8.603  | 159736 | 15.902  |

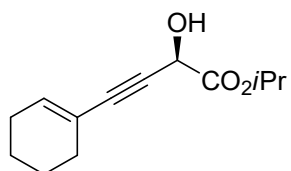

**15o**

*Chiral HPLC spectrum of racemic 15o*

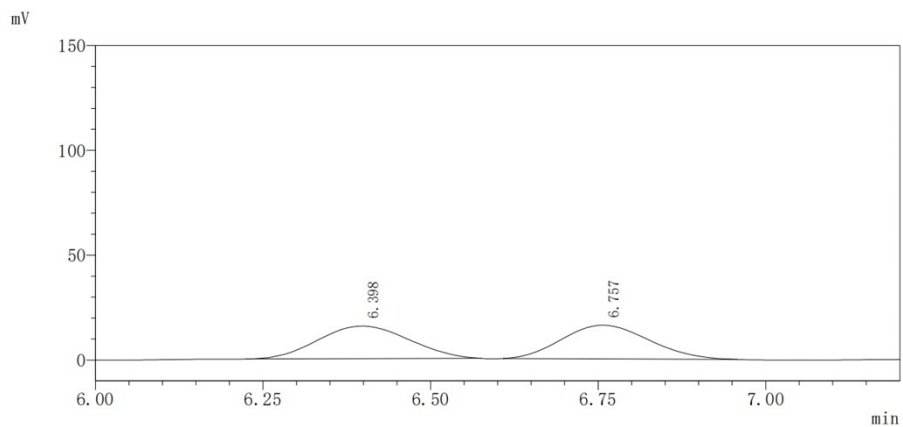

<Peak Results>

| Index | Time/min | Area   | Area%  | Height | Height% |
|-------|----------|--------|--------|--------|---------|
| 1     | 6.398    | 147565 | 50.311 | 15602  | 49.219  |
| 2     | 6.757    | 145739 | 49.689 | 16098  | 50.781  |

*Chiral HPLC spectrum of chiral (R)-15o*

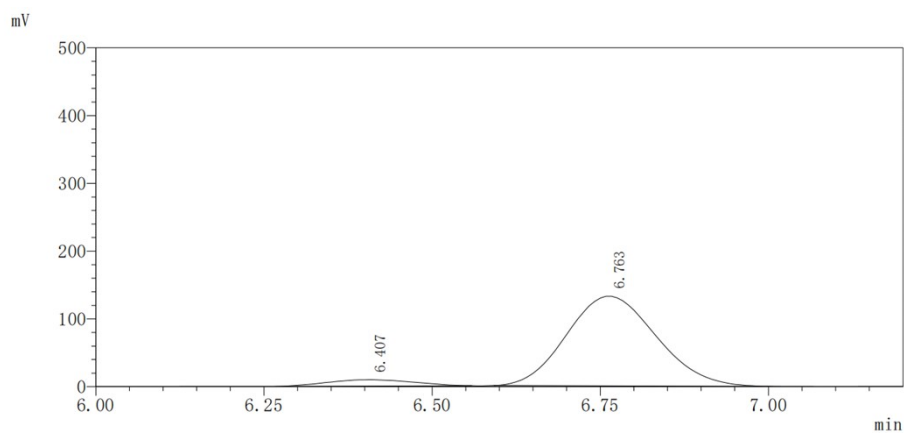

<Peak Results>

| Index | Time/min | Area    | Area%  | Height | Height% |
|-------|----------|---------|--------|--------|---------|
| 1     | 6.407    | 84579   | 6.416  | 9418   | 6.644   |
| 2     | 6.763    | 1233584 | 93.584 | 132333 | 93.356  |

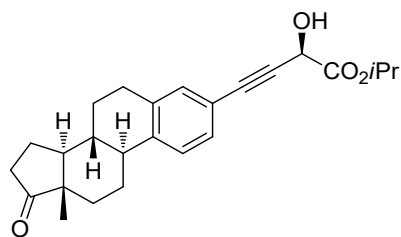

**15p**

*Chiral HPLC spectrum of racemic 15p*

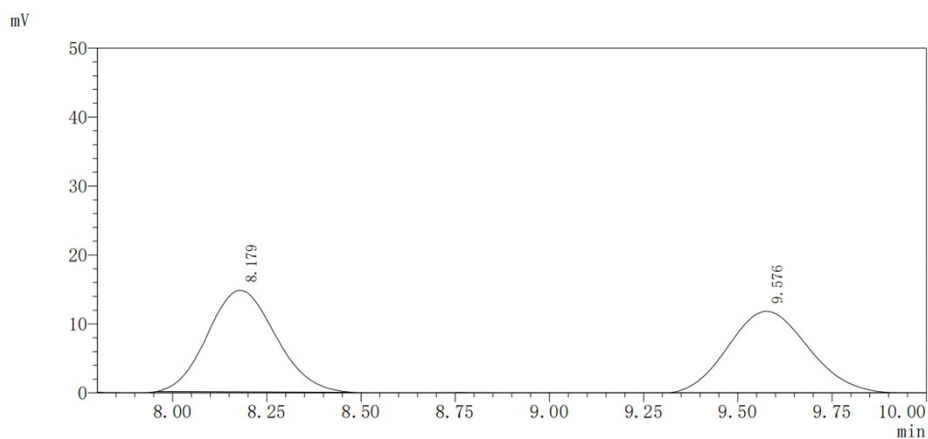

<Peak Results>

| Index | Time/min | Area   | Area%  | Height | Height% |
|-------|----------|--------|--------|--------|---------|
| 1     | 8.179    | 184520 | 50.363 | 14702  | 55.040  |
| 2     | 9.576    | 181862 | 49.637 | 12010  | 44.960  |

*Chiral HPLC spectrum of chiral (R)-15p*

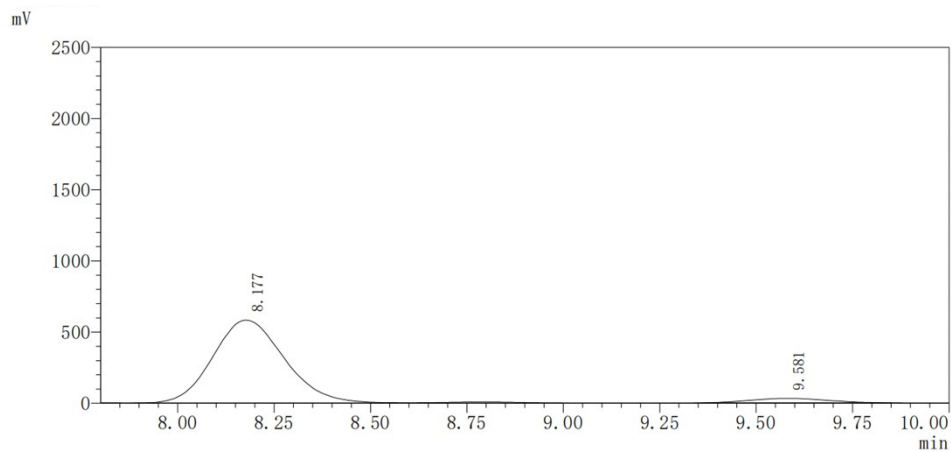

<Peak Results>

| Index | Time/min | Area    | Area%  | Height | Height% |
|-------|----------|---------|--------|--------|---------|
| 1     | 8.177    | 7590954 | 94.426 | 583730 | 94.826  |
| 2     | 9.581    | 448101  | 5.574  | 31853  | 5.174   |

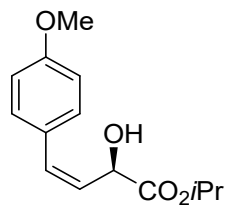

**cis-3h**

*Chiral HPLC spectrum of racemic cis-3h*

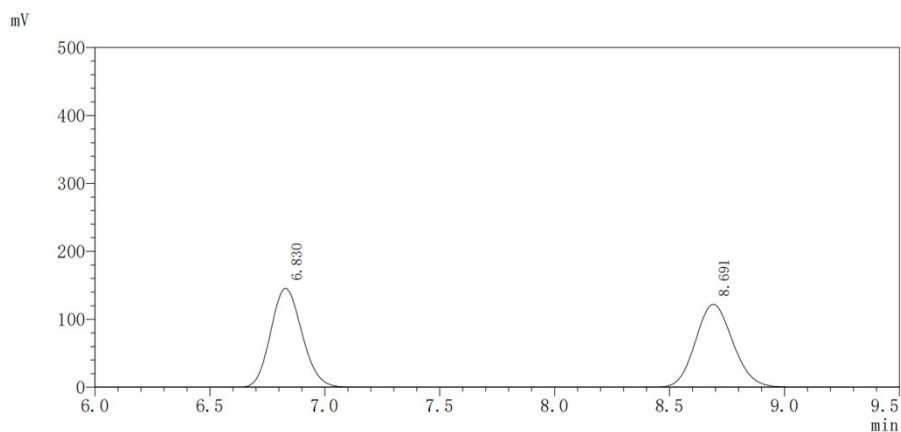

<Peak Results>

| Index | Time/min | Area    | Area%  | Height | Height% |
|-------|----------|---------|--------|--------|---------|
| 1     | 6.830    | 1384645 | 50.043 | 145749 | 54.415  |
| 2     | 8.691    | 1382243 | 49.957 | 122100 | 45.585  |

*Chiral HPLC spectrum of chiral cis-(R)-3h*

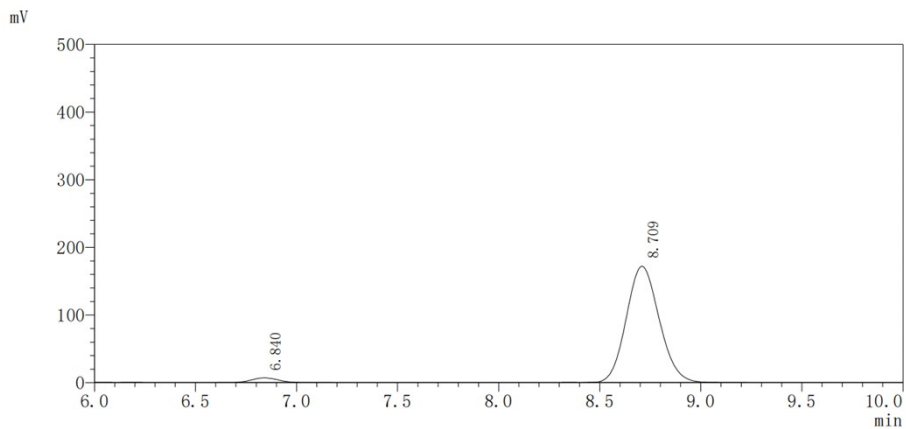

<Peak Results>

| Index | Time/min | Area    | Area%  | Height | Height% |
|-------|----------|---------|--------|--------|---------|
| 1     | 6.840    | 68895   | 3.412  | 7154   | 3.995   |
| 2     | 8.709    | 1950040 | 96.588 | 171909 | 96.005  |

## X. Reference

1. A. D. Becke, *J. Chem. Phys.* 1993, **98**, 5648-5652.
2. C. Lee, W. Yang, R. G. Parr, *Phys. Rev. B*, 1988, **37**, 785-789.
3. L. E. Roy, P. J. Hay, R. L. Parr, *J. Chem. Theory Comput.* 2008, **4**, 1029-1031.
4. R. Peverati, D. G. Truhlar, *J. Phys. Chem. Lett.* 2011, **2**, 2810-2817.
5. A. V. Marenich, C. J. Cramer, D. G. Truhlar, *J. Phys. Chem. B*, 2009, **113**, 6378-6396.
